# Supplementary material for: Integrative Analysis of Nanopore and Illumina Sequencing Reveals Alternative Splicing Complexity in Pig Longissimus Dorsi Muscle
Source: Front Genet. 2022 Apr 11;13:877646. doi: 10.3389/fgene.2022.877646 (PMC9035893; doi:10.3389/fgene.2022.877646)
Supplement: Supplementary file 1 [file Table2.XLSX]

## Sheet: Supplementary Table S2
Supplementary Table S2 Numbers and percentages of FL reads
SampleID	Number of clean reads (except rRNA)	Number of full-length reads	Full-Length Percentage (FL%)
H02	5946489	4876569	0.8201
H10	4717060	3578437	0.7586
H12	5310759	4268146	0.8037
H14	5566793	4461520	0.8015
H16	5178610	4162994	0.8039
H17	5753186	4625167	0.8039
H18	6765794	5486065	0.8109
H21	7067869	5754507	0.8142
H22	5976685	4556755	0.7624
H24	6502202	4991173	0.7676
H25	7450556	5838140	0.7836
H26	6673126	5334137	0.7993
H27	5255738	4168435	0.7931
H28	5683672	4585021	0.8067
H29	5363436	4189224	0.7811
L04	4875547	4005746	0.8216
L06	10653179	8780910	0.8243
L09	5693745	4609472	0.8096
L15	5724305	4702689	0.8215
L16	6128511	4976327	0.812
L19	4692252	3682020	0.7847
L21	9825566	7721174	0.7858
L22	5057818	4102372	0.8111
L23	12159347	9733737	0.8005
L24	5090751	4085810	0.8026
L25	8326721	6608752	0.7937
L26	6008172	4828024	0.8036
L27	5786412	4524576	0.7819
L28	6175611	4760569	0.7709
L31	5816485	4455277	0.766
