# Supplementary material for: Integrative Analysis of Nanopore and Illumina Sequencing Reveals Alternative Splicing Complexity in Pig Longissimus Dorsi Muscle
Source: Front Genet. 2022 Apr 11;13:877646. doi: 10.3389/fgene.2022.877646 (PMC9035893; doi:10.3389/fgene.2022.877646)
Supplement: Supplementary file 2 [file Table3.XLSX]

## Sheet: Supplementary Table S3
Supplementary Table S3 All new transcripts annotation results
TranscriptID	COG_class	COG_class_annotation	GO_annotation	KEGG_annotation	KEGG_pathway_annotation	KOG_class	KOG_class_annotation	Pfam_annotation	Swiss-Prot_annotation	NR_annotation
ONT.2.1	[O]	Posttranslational modification, protein turnover, chaperones	Molecular Function: threonine-type endopeptidase activity (GO:0004298);; Cellular Component: nucleus (GO:0005634);; Cellular Component: cytoplasm (GO:0005737);; Cellular Component: proteasome core complex (GO:0005839);; Biological Process: proteolysis involved in cellular protein catabolic process (GO:0051603);; Cellular Component: extracellular exosome (GO:0070062);;	K02732|5.6732e-97|bom:102283073|K02732 20S proteasome subunit beta 6 [EC:3.4.25.1] | (RefSeq) PSMB1; proteasome subunit beta 1	Proteasome (ko03050)	[O]	Posttranslational modification, protein turnover, chaperones	Proteasome subunit	Proteasome subunit beta type-1 OS=Bos taurus OX=9913 GN=PSMB1 PE=1 SV=1	PREDICTED: proteasome subunit beta type-1 [Eptesicus fuscus]
ONT.2.2	[O]	Posttranslational modification, protein turnover, chaperones	Molecular Function: threonine-type endopeptidase activity (GO:0004298);; Cellular Component: nucleus (GO:0005634);; Cellular Component: cytoplasm (GO:0005737);; Cellular Component: proteasome core complex (GO:0005839);; Biological Process: proteolysis involved in cellular protein catabolic process (GO:0051603);; Cellular Component: extracellular exosome (GO:0070062);;	K02732|4.36611e-139|ssc:100621969|K02732 20S proteasome subunit beta 6 [EC:3.4.25.1] | (RefSeq) PSMB1; proteasome subunit beta 1	Proteasome (ko03050)	[O]	Posttranslational modification, protein turnover, chaperones	Proteasome subunit	Proteasome subunit beta type-1 OS=Bos taurus OX=9913 GN=PSMB1 PE=1 SV=1	proteasome subunit beta type-1 [Sus scrofa]
ONT.2.4	--	--	Molecular Function: endopeptidase activity (GO:0004175);; Cellular Component: proteasome core complex (GO:0005839);; Biological Process: proteolysis (GO:0006508);; Cellular Component: membrane-bounded organelle (GO:0043227);;	K02732|1.31321e-65|ssc:100621969|K02732 20S proteasome subunit beta 6 [EC:3.4.25.1] | (RefSeq) PSMB1; proteasome subunit beta 1	Proteasome (ko03050)	[O]	Posttranslational modification, protein turnover, chaperones	Proteasome subunit	Proteasome subunit beta type-1 OS=Bos taurus OX=9913 GN=PSMB1 PE=1 SV=1	proteasome subunit beta type-1 [Physeter catodon]
ONT.2.5	--	--	Molecular Function: endopeptidase activity (GO:0004175);; Cellular Component: proteasome core complex (GO:0005839);; Biological Process: proteolysis (GO:0006508);; Cellular Component: membrane-bounded organelle (GO:0043227);;	K02732|5.79561e-75|ssc:100621969|K02732 20S proteasome subunit beta 6 [EC:3.4.25.1] | (RefSeq) PSMB1; proteasome subunit beta 1	Proteasome (ko03050)	[O]	Posttranslational modification, protein turnover, chaperones	--	Proteasome subunit beta type-1 OS=Bos taurus OX=9913 GN=PSMB1 PE=1 SV=1	proteasome subunit beta type-1 [Sus scrofa]
ONT.2.8	--	--	Cellular Component: proteasome complex (GO:0000502);; Molecular Function: peptidase activity (GO:0008233);;	K02732|2.85085e-37|rno:94198|K02732 20S proteasome subunit beta 6 [EC:3.4.25.1] | (RefSeq) Psmb1; proteasome subunit beta 1	Proteasome (ko03050)	[O]	Posttranslational modification, protein turnover, chaperones	Proteasome subunit	Proteasome subunit beta type-1 OS=Bos taurus OX=9913 GN=PSMB1 PE=1 SV=1	PSMB1 [Cervus elaphus hippelaphus]
ONT.2.9	--	--	Molecular Function: hydrolase activity (GO:0016787);; Cellular Component: intracellular part (GO:0044424);;	K02732|7.71267e-16|myb:102259848|K02732 20S proteasome subunit beta 6 [EC:3.4.25.1] | (RefSeq) proteasome subunit beta type-1	Proteasome (ko03050)	[O]	Posttranslational modification, protein turnover, chaperones	--	Proteasome subunit beta type-1 OS=Bos taurus OX=9913 GN=PSMB1 PE=1 SV=1	Proteasome subunit beta type-1 [Myotis brandtii]
ONT.5.1	--	--	--	--	--	--	--	--	--	--
ONT.6.1	--	--	--	--	--	--	--	--	--	--
ONT.7.1	--	--	--	--	--	--	--	--	--	--
ONT.8.2	--	--	--	--	--	--	--	--	Endoplasmic reticulum membrane-associated RNA degradation protein (Fragment) OS=Macaca fascicularis OX=9541 GN=ERMARD PE=2 SV=2	endoplasmic reticulum membrane-associated RNA degradation protein isoform X6 [Sus scrofa]
ONT.9.2	--	--	Cellular Component: integral component of membrane (GO:0016021);;	--	--	--	--	--	Endoplasmic reticulum membrane-associated RNA degradation protein (Fragment) OS=Macaca fascicularis OX=9541 GN=ERMARD PE=2 SV=2	endoplasmic reticulum membrane-associated RNA degradation protein isoform X2 [Sus scrofa]
ONT.9.3	--	--	--	--	--	--	--	--	Endoplasmic reticulum membrane-associated RNA degradation protein (Fragment) OS=Macaca fascicularis OX=9541 GN=ERMARD PE=2 SV=2	endoplasmic reticulum membrane-associated RNA degradation protein isoform X3 [Sus scrofa]
ONT.9.8	--	--	Cellular Component: membrane (GO:0016020);;	--	--	--	--	--	Endoplasmic reticulum membrane-associated RNA degradation protein (Fragment) OS=Macaca fascicularis OX=9541 GN=ERMARD PE=2 SV=2	endoplasmic reticulum membrane-associated RNA degradation protein isoform X4 [Sus scrofa]
ONT.9.9	--	--	--	--	--	--	--	--	Endoplasmic reticulum membrane-associated RNA degradation protein (Fragment) OS=Macaca fascicularis OX=9541 GN=ERMARD PE=2 SV=2	endoplasmic reticulum membrane-associated RNA degradation protein isoform X2 [Sus scrofa]
ONT.9.10	--	--	Cellular Component: integral component of membrane (GO:0016021);;	--	--	--	--	--	Endoplasmic reticulum membrane-associated RNA degradation protein (Fragment) OS=Macaca fascicularis OX=9541 GN=ERMARD PE=2 SV=2	endoplasmic reticulum membrane-associated RNA degradation protein isoform X1 [Sus scrofa]
ONT.10.1	--	--	--	--	--	[R]	General function prediction only	--	PHD finger protein 10 OS=Bos taurus OX=9913 GN=PHF10 PE=2 SV=1	PHD finger protein 10 isoform X1 [Physeter catodon]
ONT.10.2	--	--	--	--	--	[R]	General function prediction only	--	PHD finger protein 10 OS=Bos taurus OX=9913 GN=PHF10 PE=2 SV=1	PHD finger protein 10 isoform X2 [Sus scrofa]
ONT.10.3	--	--	--	--	--	[R]	General function prediction only	--	PHD finger protein 10 OS=Bos taurus OX=9913 GN=PHF10 PE=2 SV=1	PHD finger protein 10 isoform X2 [Sus scrofa]
ONT.10.4	--	--	Cellular Component: nucleus (GO:0005634);; Molecular Function: zinc ion binding (GO:0008270);;	--	--	[R]	General function prediction only	PHD-finger	PHD finger protein 10 OS=Bos taurus OX=9913 GN=PHF10 PE=2 SV=1	PHD finger protein 10 isoform X3 [Sus scrofa]
ONT.10.5	--	--	--	--	--	--	--	--	--	--
ONT.11.3	--	--	--	--	--	--	--	Putative cytokine, C6ORF120	UPF0669 protein C6orf120 homolog OS=Macaca fascicularis OX=9541 GN=QflA-14362 PE=2 SV=2	PREDICTED: UPF0669 protein C6orf120 homolog [Tursiops truncatus]
ONT.11.4	--	--	--	--	--	--	--	Putative cytokine, C6ORF120	UPF0669 protein C6orf120 homolog OS=Bos taurus OX=9913 PE=2 SV=1	UPF0669 protein C6orf120 homolog [Sus scrofa]
ONT.11.5	--	--	--	--	--	--	--	Putative cytokine, C6ORF120;; Putative cytokine, C6ORF120	UPF0669 protein C6orf120 homolog OS=Bos taurus OX=9913 PE=2 SV=1	UPF0669 protein C6orf120 homolog [Sus scrofa]
ONT.13.1	--	--	--	--	--	--	--	--	--	--
ONT.13.2	--	--	--	--	--	--	--	--	--	--
ONT.13.3	--	--	--	--	--	--	--	--	--	--
ONT.16.1	--	--	--	K05702|3.03456e-31|ssc:100514741|K05702 afadin | (RefSeq) AFDN, MLLT4; afadin, adherens junction formation factor	Ras signaling pathway (ko04014);; Rap1 signaling pathway (ko04015);; cAMP signaling pathway (ko04024);; Adherens junction (ko04520);; Tight junction (ko04530);; Leukocyte transendothelial migration (ko04670)	--	--	--	--	afadin isoform X15 [Sus scrofa]
ONT.18.1	--	--	Biological Process: regulation of cellular process (GO:0050794);;	K16546|1.51956e-57|ssc:100153548|K16546 FGFR1 oncogene partner | (RefSeq) FGFR1OP; FGFR1 oncogene partner	--	--	--	FOP N terminal dimerisation domain	FGFR1 oncogene partner OS=Bos taurus OX=9913 GN=FGFR1OP PE=2 SV=1	FGFR1 oncogene partner isoform X2 [Sus scrofa]
ONT.19.1	--	--	Molecular Function: RNA binding (GO:0003723);; Cellular Component: extracellular space (GO:0005615);; Cellular Component: endoplasmic reticulum lumen (GO:0005788);; Biological Process: RNA catabolic process (GO:0006401);; Molecular Function: ribonuclease T2 activity (GO:0033897);; Cellular Component: lysosomal lumen (GO:0043202);; Biological Process: RNA phosphodiester bond hydrolysis, endonucleo…	K01166|9.91395e-85|ssc:100157985|K01166 ribonuclease T2 [EC:3.1.27.1] | (RefSeq) RNASET2; ribonuclease T2	--	[A]	RNA processing and modification	Ribonuclease T2 family;; Ribonuclease T2 family	Ribonuclease T2 OS=Sus scrofa OX=9823 GN=RNASET2 PE=1 SV=1	ribonuclease T2 [Sus scrofa]
ONT.20.1	--	--	--	--	--	--	--	--	--	--
ONT.21.1	--	--	--	--	--	--	--	--	--	--
ONT.23.1	--	--	Cellular Component: mitochondrial inner membrane (GO:0005743);; Cellular Component: integral component of membrane (GO:0016021);; Molecular Function: pyruvate transmembrane transporter activity (GO:0050833);; Biological Process: mitochondrial acetyl-CoA biosynthetic process from pyruvate (GO:0061732);; Biological Process: mitochondrial pyruvate transmembrane transport (GO:1902361);;	--	--	[S]	Function unknown	Uncharacterised protein family (UPF0041)	Mitochondrial pyruvate carrier 1 OS=Bos taurus OX=9913 GN=MPC1 PE=1 SV=1	PREDICTED: mitochondrial pyruvate carrier 1 [Camelus dromedarius]
ONT.23.2	--	--	Cellular Component: mitochondrial inner membrane (GO:0005743);; Cellular Component: integral component of membrane (GO:0016021);; Molecular Function: pyruvate transmembrane transporter activity (GO:0050833);; Biological Process: mitochondrial acetyl-CoA biosynthetic process from pyruvate (GO:0061732);; Biological Process: mitochondrial pyruvate transmembrane transport (GO:1902361);;	--	--	[S]	Function unknown	Uncharacterised protein family (UPF0041)	Mitochondrial pyruvate carrier 1 OS=Bos taurus OX=9913 GN=MPC1 PE=1 SV=1	mitochondrial pyruvate carrier 1 isoform X2 [Sus scrofa]
ONT.23.3	--	--	--	--	--	--	--	--	--	--
ONT.23.4	--	--	Cellular Component: mitochondrial inner membrane (GO:0005743);; Biological Process: mitochondrial pyruvate transport (GO:0006850);; Cellular Component: integral component of membrane (GO:0016021);; Biological Process: vesicle-mediated transport (GO:0016192);;	--	--	[S]	Function unknown	Uncharacterised protein family (UPF0041)	Mitochondrial pyruvate carrier 1 OS=Bos taurus OX=9913 GN=MPC1 PE=1 SV=1	mitochondrial pyruvate carrier 1 isoform X1 [Trichechus manatus latirostris]
ONT.23.5	--	--	--	--	--	--	--	--	--	--
ONT.24.1	--	--	--	--	--	[U]	Intracellular trafficking, secretion, and vesicular transport	Got1/Sft2-like family	--	vesicle transport protein SFT2A [Sus scrofa]
ONT.24.2	--	--	--	--	--	[U]	Intracellular trafficking, secretion, and vesicular transport	Got1/Sft2-like family;; Got1/Sft2-like family	--	vesicle transport protein SFT2A [Sus scrofa]
ONT.24.3	--	--	Cellular Component: integral component of membrane (GO:0016021);; Biological Process: vesicle-mediated transport (GO:0016192);;	--	--	[U]	Intracellular trafficking, secretion, and vesicular transport	Got1/Sft2-like family	--	PREDICTED: vesicle transport protein SFT2A-like isoform X1 [Pantholops hodgsonii]
ONT.24.4	--	--	--	--	--	[U]	Intracellular trafficking, secretion, and vesicular transport	Got1/Sft2-like family	--	vesicle transport protein SFT2A [Sus scrofa]
ONT.24.5	--	--	--	--	--	[U]	Intracellular trafficking, secretion, and vesicular transport	Got1/Sft2-like family	--	PREDICTED: vesicle transport protein SFT2A-like isoform X1 [Pantholops hodgsonii]
ONT.24.6	--	--	Biological Process: transport (GO:0006810);; Cellular Component: membrane (GO:0016020);;	--	--	[U]	Intracellular trafficking, secretion, and vesicular transport	--	--	vesicle transport protein SFT2A [Sus scrofa]
ONT.24.7	--	--	Molecular Function: protein kinase activity (GO:0004672);; Molecular Function: ATP binding (GO:0005524);; Cellular Component: mitochondrial inner membrane (GO:0005743);; Biological Process: protein phosphorylation (GO:0006468);; Biological Process: mitochondrial pyruvate transport (GO:0006850);; Cellular Component: integral component of membrane (GO:0016021);; Biological Process: vesicle-mediated…	--	--	[U]	Intracellular trafficking, secretion, and vesicular transport	Got1/Sft2-like family	--	PREDICTED: vesicle transport protein SFT2A [Bison bison bison]
ONT.24.8	--	--	--	--	--	[U]	Intracellular trafficking, secretion, and vesicular transport	Got1/Sft2-like family	--	PREDICTED: vesicle transport protein SFT2A [Mustela putorius furo]
ONT.24.10	--	--	--	--	--	[U]	Intracellular trafficking, secretion, and vesicular transport	--	--	vesicle transport protein SFT2A [Sus scrofa]
ONT.24.11	--	--	--	--	--	[U]	Intracellular trafficking, secretion, and vesicular transport	Got1/Sft2-like family	--	vesicle transport protein SFT2A [Sus scrofa]
ONT.24.12	--	--	Biological Process: transport (GO:0006810);; Cellular Component: membrane (GO:0016020);;	--	--	[U]	Intracellular trafficking, secretion, and vesicular transport	Got1/Sft2-like family	--	PREDICTED: vesicle transport protein SFT2A [Ailuropoda melanoleuca]
ONT.24.13	--	--	--	--	--	--	--	--	--	--
ONT.24.15	--	--	Biological Process: transport (GO:0006810);; Cellular Component: membrane (GO:0016020);;	--	--	[U]	Intracellular trafficking, secretion, and vesicular transport	Got1/Sft2-like family;; Got1/Sft2-like family	--	vesicle transport protein SFT2A [Sus scrofa]
ONT.24.16	--	--	Cellular Component: integral component of membrane (GO:0016021);; Biological Process: vesicle-mediated transport (GO:0016192);;	--	--	[U]	Intracellular trafficking, secretion, and vesicular transport	Got1/Sft2-like family	--	vesicle transport protein SFT2A [Sus scrofa]
ONT.24.17	--	--	--	--	--	[U]	Intracellular trafficking, secretion, and vesicular transport	Got1/Sft2-like family	--	vesicle transport protein SFT2A [Sus scrofa]
ONT.24.18	--	--	--	--	--	[U]	Intracellular trafficking, secretion, and vesicular transport	--	--	PREDICTED: vesicle transport protein SFT2A [Rhinolophus sinicus]
ONT.24.20	--	--	--	--	--	[U]	Intracellular trafficking, secretion, and vesicular transport	Got1/Sft2-like family	--	vesicle transport protein SFT2A [Sus scrofa]
ONT.24.21	--	--	Cellular Component: integral component of membrane (GO:0016021);; Biological Process: vesicle-mediated transport (GO:0016192);;	--	--	[U]	Intracellular trafficking, secretion, and vesicular transport	Got1/Sft2-like family	--	PREDICTED: vesicle transport protein SFT2A-like isoform X1 [Pantholops hodgsonii]
ONT.24.22	--	--	Cellular Component: integral component of membrane (GO:0016021);; Biological Process: vesicle-mediated transport (GO:0016192);;	--	--	[U]	Intracellular trafficking, secretion, and vesicular transport	Got1/Sft2-like family	--	vesicle transport protein SFT2A [Sus scrofa]
ONT.24.26	--	--	--	--	--	[U]	Intracellular trafficking, secretion, and vesicular transport	Got1/Sft2-like family	--	vesicle transport protein SFT2A [Sus scrofa]
ONT.24.30	--	--	Cellular Component: integral component of membrane (GO:0016021);; Biological Process: vesicle-mediated transport (GO:0016192);;	--	--	[U]	Intracellular trafficking, secretion, and vesicular transport	Got1/Sft2-like family	--	vesicle transport protein SFT2A [Sus scrofa]
ONT.24.32	--	--	--	--	--	--	--	--	--	--
ONT.25.1	--	--	--	--	--	--	--	--	--	--
ONT.26.1	--	--	--	--	--	--	--	--	--	--
ONT.28.1	--	--	--	--	--	--	--	--	--	--
ONT.29.2	--	--	--	--	--	--	--	--	--	--
ONT.30.1	--	--	--	--	--	--	--	--	--	--
ONT.31.1	--	--	--	--	--	--	--	--	--	--
ONT.31.2	--	--	--	--	--	--	--	--	--	--
ONT.31.3	--	--	--	--	--	--	--	--	--	--
ONT.31.4	--	--	--	--	--	--	--	--	--	--
ONT.32.1	--	--	--	--	--	--	--	--	--	--
ONT.33.1	--	--	--	--	--	--	--	--	--	--
ONT.35.1	--	--	--	--	--	--	--	--	--	--
ONT.36.1	--	--	--	--	--	--	--	--	--	--
ONT.37.1	--	--	Biological Process: cell morphogenesis (GO:0000902);; Cellular Component: nucleus (GO:0005634);; Cellular Component: lysosome (GO:0005764);; Biological Process: organelle organization (GO:0006996);; Biological Process: tissue development (GO:0009888);; Cellular Component: endomembrane system (GO:0012505);; Biological Process: regulation of cell projection organization (GO:0031344);; Cellular Comp…	K20042|6.98935e-07|ssc:100738219|K20042 F-BAR domain only protein | (RefSeq) F-BAR domain only protein 2-like	--	--	--	--	--	cullin-7 isoform X1 [Sus scrofa]
ONT.38.1	--	--	--	--	--	--	--	--	--	--
ONT.40.1	--	--	Molecular Function: 1-acylglycerol-3-phosphate O-acyltransferase activity (GO:0003841);; Cellular Component: integral component of membrane (GO:0016021);; Biological Process: CDP-diacylglycerol biosynthetic process (GO:0016024);;	K13523|2.13146e-76|ssc:100156632|K13523 lysophosphatidic acid acyltransferase / lysophosphatidylinositol acyltransferase [EC:2.3.1.51 2.3.1.-] | (RefSeq) AGPAT4; 1-acylglycerol-3-phosphate O-acyltransferase 4	Glycerolipid metabolism (ko00561);; Glycerophospholipid metabolism (ko00564);; Phospholipase D signaling pathway (ko04072)	[I]	Lipid transport and metabolism	--	1-acyl-sn-glycerol-3-phosphate acyltransferase delta OS=Bos taurus OX=9913 GN=AGPAT4 PE=2 SV=1	PREDICTED: 1-acyl-sn-glycerol-3-phosphate acyltransferase delta [Odobenus rosmarus divergens]
ONT.40.2	--	--	Biological Process: metabolic process (GO:0008152);; Cellular Component: integral component of membrane (GO:0016021);; Molecular Function: transferase activity, transferring acyl groups (GO:0016746);;	K13523|8.17896e-52|ssc:100156632|K13523 lysophosphatidic acid acyltransferase / lysophosphatidylinositol acyltransferase [EC:2.3.1.51 2.3.1.-] | (RefSeq) AGPAT4; 1-acylglycerol-3-phosphate O-acyltransferase 4	Glycerolipid metabolism (ko00561);; Glycerophospholipid metabolism (ko00564);; Phospholipase D signaling pathway (ko04072)	[I]	Lipid transport and metabolism	Acyltransferase C-terminus	1-acyl-sn-glycerol-3-phosphate acyltransferase delta OS=Bos taurus OX=9913 GN=AGPAT4 PE=2 SV=1	1-acyl-sn-glycerol-3-phosphate acyltransferase delta isoform X2 [Sus scrofa]
ONT.40.3	--	--	--	--	--	--	--	--	--	--
ONT.41.1	--	--	--	K13523|4.71586e-07|pale:102879252|K13523 lysophosphatidic acid acyltransferase / lysophosphatidylinositol acyltransferase [EC:2.3.1.51 2.3.1.-] | (RefSeq) AGPAT4; 1-acylglycerol-3-phosphate O-acyltransferase 4	Glycerolipid metabolism (ko00561);; Glycerophospholipid metabolism (ko00564);; Phospholipase D signaling pathway (ko04072)	[I]	Lipid transport and metabolism	--	1-acyl-sn-glycerol-3-phosphate acyltransferase delta OS=Bos taurus OX=9913 GN=AGPAT4 PE=2 SV=1	PREDICTED: 1-acyl-sn-glycerol-3-phosphate acyltransferase delta [Pteropus alecto]
ONT.42.1	[T]	Signal transduction mechanisms	Molecular Function: signal transducer, downstream of receptor, with serine/threonine kinase activity (GO:0004702);; Cellular Component: cytoplasm (GO:0005737);; Biological Process: positive regulation of MAPK cascade (GO:0043410);; Biological Process: single-organism developmental process (GO:0044767);; Biological Process: anatomical structure development (GO:0048856);; Biological Process: positi…	K04428|1.54204e-61|ssc:100154202|K04428 mitogen-activated protein kinase kinase kinase 4 [EC:2.7.11.25] | (RefSeq) mitogen-activated protein kinase kinase kinase 4	MAPK signaling pathway (ko04010);; GnRH signaling pathway (ko04912)	[T]	Signal transduction mechanisms	Protein kinase domain;; Protein tyrosine kinase	Serine/threonine-protein kinase PAK 3 OS=Pongo pygmaeus OX=9600 GN=PAK3 PE=2 SV=1	mitogen-activated protein kinase kinase kinase 4-like isoform X2 [Odocoileus virginianus texanus]
ONT.43.1	--	--	--	--	--	--	--	--	--	--
ONT.44.2	--	--	--	--	--	--	--	--	--	--
ONT.45.1	--	--	--	--	--	--	--	--	--	cullin-7 isoform X1 [Sus scrofa]
ONT.46.1	--	--	Molecular Function: RNA binding (GO:0003723);; Molecular Function: structural constituent of ribosome (GO:0003735);; Cellular Component: mitochondrial inner membrane (GO:0005743);; Cellular Component: ribosome (GO:0005840);; Biological Process: transport (GO:0006810);; Biological Process: mitochondrial translational initiation (GO:0070124);; Biological Process: mitochondrial translational elongat…	K02881|6.53382e-45|ssc:100156324|K02881 large subunit ribosomal protein L18 | (RefSeq) MRPL18; mitochondrial ribosomal protein L18	Ribosome (ko03010)	[J]	Translation, ribosomal structure and biogenesis	--	39S ribosomal protein L18, mitochondrial OS=Bos taurus OX=9913 GN=MRPL18 PE=2 SV=1	39S ribosomal protein L18, mitochondrial [Tupaia chinensis]
ONT.46.3	[J]	Translation, ribosomal structure and biogenesis	Molecular Function: structural constituent of ribosome (GO:0003735);; Cellular Component: mitochondrion (GO:0005739);; Cellular Component: ribosome (GO:0005840);; Biological Process: translation (GO:0006412);; Molecular Function: 5S rRNA binding (GO:0008097);;	K02881|1.6605e-83|ssc:100156324|K02881 large subunit ribosomal protein L18 | (RefSeq) MRPL18; mitochondrial ribosomal protein L18	Ribosome (ko03010)	[J]	Translation, ribosomal structure and biogenesis	--	39S ribosomal protein L18, mitochondrial OS=Bos taurus OX=9913 GN=MRPL18 PE=2 SV=1	39S ribosomal protein L18, mitochondrial isoform X2 [Sus scrofa]
ONT.46.4	--	--	Molecular Function: structural constituent of ribosome (GO:0003735);; Cellular Component: ribosome (GO:0005840);; Biological Process: translation (GO:0006412);;	K02881|1.81264e-38|ssc:100156324|K02881 large subunit ribosomal protein L18 | (RefSeq) MRPL18; mitochondrial ribosomal protein L18	Ribosome (ko03010)	[J]	Translation, ribosomal structure and biogenesis	--	39S ribosomal protein L18, mitochondrial OS=Bos taurus OX=9913 GN=MRPL18 PE=2 SV=1	39S ribosomal protein L18, mitochondrial isoform X2 [Sus scrofa]
ONT.46.6	--	--	--	--	--	--	--	--	--	--
ONT.46.7	[J]	Translation, ribosomal structure and biogenesis	Molecular Function: structural constituent of ribosome (GO:0003735);; Cellular Component: extracellular space (GO:0005615);; Cellular Component: mitochondrion (GO:0005739);; Cellular Component: ribosome (GO:0005840);; Biological Process: translation (GO:0006412);; Molecular Function: 5S rRNA binding (GO:0008097);; Biological Process: rRNA import into mitochondrion (GO:0035928);;	K02881|9.33574e-64|ssc:100156324|K02881 large subunit ribosomal protein L18 | (RefSeq) MRPL18; mitochondrial ribosomal protein L18	Ribosome (ko03010)	[J]	Translation, ribosomal structure and biogenesis	Ribosomal L18 of archaea, bacteria, mitoch. and chloroplast	39S ribosomal protein L18, mitochondrial OS=Bos taurus OX=9913 GN=MRPL18 PE=2 SV=1	PREDICTED: 39S ribosomal protein L18, mitochondrial isoform X4 [Ursus maritimus]
ONT.46.9	--	--	Molecular Function: structural constituent of ribosome (GO:0003735);; Cellular Component: ribosome (GO:0005840);; Biological Process: translation (GO:0006412);;	K02881|1.44372e-39|ssc:100156324|K02881 large subunit ribosomal protein L18 | (RefSeq) MRPL18; mitochondrial ribosomal protein L18	Ribosome (ko03010)	[J]	Translation, ribosomal structure and biogenesis	--	39S ribosomal protein L18, mitochondrial OS=Bos taurus OX=9913 GN=MRPL18 PE=2 SV=1	39S ribosomal protein L18, mitochondrial isoform X1 [Sus scrofa]
ONT.47.1	[O]	Posttranslational modification, protein turnover, chaperones	Cellular Component: pericentriolar material (GO:0000242);; Cellular Component: acrosomal vesicle (GO:0001669);; Cellular Component: zona pellucida receptor complex (GO:0002199);; Molecular Function: ATP binding (GO:0005524);; Cellular Component: nuclear heterochromatin (GO:0005720);; Cellular Component: Golgi apparatus (GO:0005794);; Cellular Component: chaperonin-containing T-complex (GO:0005832…	K09493|4.65247e-103|umr:103660832|K09493 T-complex protein 1 subunit alpha | (RefSeq) TCP1; t-complex 1	--	[O]	Posttranslational modification, protein turnover, chaperones	TCP-1/cpn60 chaperonin family;; TCP-1/cpn60 chaperonin family	T-complex protein 1 subunit alpha OS=Macaca fascicularis OX=9541 GN=TCP1 PE=2 SV=1	PREDICTED: T-complex protein 1 subunit alpha [Ursus maritimus]
ONT.47.2	[O]	Posttranslational modification, protein turnover, chaperones	Cellular Component: pericentriolar material (GO:0000242);; Cellular Component: acrosomal vesicle (GO:0001669);; Cellular Component: zona pellucida receptor complex (GO:0002199);; Molecular Function: ATP binding (GO:0005524);; Cellular Component: nuclear heterochromatin (GO:0005720);; Cellular Component: Golgi apparatus (GO:0005794);; Cellular Component: chaperonin-containing T-complex (GO:0005832…	K09493|0|ssc:100153485|K09493 T-complex protein 1 subunit alpha | (RefSeq) TCP1; t-complex 1	--	[O]	Posttranslational modification, protein turnover, chaperones	TCP-1/cpn60 chaperonin family;; TCP-1/cpn60 chaperonin family	T-complex protein 1 subunit alpha OS=Bos taurus OX=9913 GN=TCP1 PE=1 SV=1	T-complex protein 1 subunit alpha [Sus scrofa]
ONT.47.3	[O]	Posttranslational modification, protein turnover, chaperones	Molecular Function: binding (GO:0005488);; Cellular Component: cytoplasm (GO:0005737);; Cellular Component: intracellular non-membrane-bounded organelle (GO:0043232);; Cellular Component: intracellular organelle part (GO:0044446);;	K09493|1.12052e-79|xtr:100487607|K09493 T-complex protein 1 subunit alpha | (RefSeq) tcp1, cct-alpha, ccta, tcp1a, tcp1alpha; t-complex 1	--	[O]	Posttranslational modification, protein turnover, chaperones	--	T-complex protein 1 subunit alpha OS=Bos taurus OX=9913 GN=TCP1 PE=1 SV=1	T-complex protein 1 subunit alpha isoform X1 [Trichechus manatus latirostris]
ONT.47.5	[O]	Posttranslational modification, protein turnover, chaperones	Cellular Component: microtubule organizing center (GO:0005815);; Cellular Component: chaperonin-containing T-complex (GO:0005832);; Biological Process: cellular process (GO:0009987);; Cellular Component: membrane-bounded organelle (GO:0043227);; Molecular Function: organic cyclic compound binding (GO:0097159);; Molecular Function: heterocyclic compound binding (GO:1901363);;	K09493|0|ssc:100153485|K09493 T-complex protein 1 subunit alpha | (RefSeq) TCP1; t-complex 1	--	[O]	Posttranslational modification, protein turnover, chaperones	TCP-1/cpn60 chaperonin family;; TCP-1/cpn60 chaperonin family;; TCP-1/cpn60 chaperonin family;; TCP-1/cpn60 chaperonin family	T-complex protein 1 subunit alpha OS=Bos taurus OX=9913 GN=TCP1 PE=1 SV=1	T-complex protein 1 subunit alpha [Sus scrofa]
ONT.47.7	[O]	Posttranslational modification, protein turnover, chaperones	Cellular Component: pericentriolar material (GO:0000242);; Cellular Component: acrosomal vesicle (GO:0001669);; Cellular Component: zona pellucida receptor complex (GO:0002199);; Molecular Function: ATP binding (GO:0005524);; Cellular Component: nuclear heterochromatin (GO:0005720);; Cellular Component: Golgi apparatus (GO:0005794);; Cellular Component: chaperonin-containing T-complex (GO:0005832…	K09493|1.03829e-67|ngi:103734797|K09493 T-complex protein 1 subunit alpha | (RefSeq) Tcp1; t-complex 1	--	[O]	Posttranslational modification, protein turnover, chaperones	TCP-1/cpn60 chaperonin family	T-complex protein 1 subunit alpha OS=Monodelphis domestica OX=13616 GN=TCP1 PE=2 SV=1	T-complex protein 1 subunit alpha [Monodelphis domestica]
ONT.47.8	[O]	Posttranslational modification, protein turnover, chaperones	Cellular Component: pericentriolar material (GO:0000242);; Cellular Component: acrosomal vesicle (GO:0001669);; Cellular Component: zona pellucida receptor complex (GO:0002199);; Molecular Function: ATP binding (GO:0005524);; Cellular Component: nuclear heterochromatin (GO:0005720);; Cellular Component: Golgi apparatus (GO:0005794);; Cellular Component: chaperonin-containing T-complex (GO:0005832…	K09493|1.03388e-125|oas:100135437|K09493 T-complex protein 1 subunit alpha | (RefSeq) TCP1; t-complex 1	--	[O]	Posttranslational modification, protein turnover, chaperones	TCP-1/cpn60 chaperonin family;; TCP-1/cpn60 chaperonin family	T-complex protein 1 subunit alpha OS=Bos taurus OX=9913 GN=TCP1 PE=1 SV=1	PREDICTED: T-complex protein 1 subunit alpha [Ovis aries]
ONT.47.9	[O]	Posttranslational modification, protein turnover, chaperones	Cellular Component: intracellular organelle (GO:0043229);;	K09493|1.81467e-83|umr:103660832|K09493 T-complex protein 1 subunit alpha | (RefSeq) TCP1; t-complex 1	--	[O]	Posttranslational modification, protein turnover, chaperones	TCP-1/cpn60 chaperonin family	T-complex protein 1 subunit alpha OS=Bos taurus OX=9913 GN=TCP1 PE=1 SV=1	T-complex protein 1 subunit alpha isoform 1 [Camelus ferus]
ONT.47.14	[O]	Posttranslational modification, protein turnover, chaperones	Cellular Component: microtubule organizing center (GO:0005815);; Biological Process: cellular process (GO:0009987);; Cellular Component: macromolecular complex (GO:0032991);; Cellular Component: membrane-bounded organelle (GO:0043227);; Cellular Component: cytoplasmic part (GO:0044444);; Molecular Function: organic cyclic compound binding (GO:0097159);; Molecular Function: heterocyclic compound b…	K09493|4.33175e-115|ssc:100153485|K09493 T-complex protein 1 subunit alpha | (RefSeq) TCP1; t-complex 1	--	[O]	Posttranslational modification, protein turnover, chaperones	TCP-1/cpn60 chaperonin family;; TCP-1/cpn60 chaperonin family	T-complex protein 1 subunit alpha OS=Bos taurus OX=9913 GN=TCP1 PE=1 SV=1	LOW QUALITY PROTEIN: T-complex protein 1 subunit alpha [Dasypus novemcinctus]
ONT.47.16	[O]	Posttranslational modification, protein turnover, chaperones	Molecular Function: nucleotide binding (GO:0000166);; Molecular Function: protein binding (GO:0005515);; Cellular Component: centrosome (GO:0005813);; Biological Process: transport (GO:0006810);; Cellular Component: endomembrane system (GO:0012505);; Cellular Component: vesicle (GO:0031982);; Cellular Component: intracellular membrane-bounded organelle (GO:0043231);; Cellular Component: protein c…	K09493|1.00558e-89|lve:103071317|K09493 T-complex protein 1 subunit alpha | (RefSeq) T-complex protein 1 subunit alpha-like	--	[O]	Posttranslational modification, protein turnover, chaperones	TCP-1/cpn60 chaperonin family;; TCP-1/cpn60 chaperonin family	T-complex protein 1 subunit alpha OS=Bos taurus OX=9913 GN=TCP1 PE=1 SV=1	T-complex protein 1 subunit alpha-like protein, partial [Equus caballus]
ONT.47.17	[O]	Posttranslational modification, protein turnover, chaperones	Cellular Component: microtubule organizing center (GO:0005815);; Biological Process: cellular process (GO:0009987);; Cellular Component: macromolecular complex (GO:0032991);; Cellular Component: membrane-bounded organelle (GO:0043227);; Cellular Component: cytoplasmic part (GO:0044444);; Molecular Function: organic cyclic compound binding (GO:0097159);; Molecular Function: heterocyclic compound b…	K09493|1.45912e-99|lve:103071317|K09493 T-complex protein 1 subunit alpha | (RefSeq) T-complex protein 1 subunit alpha-like	--	[O]	Posttranslational modification, protein turnover, chaperones	TCP-1/cpn60 chaperonin family;; TCP-1/cpn60 chaperonin family;; TCP-1/cpn60 chaperonin family	T-complex protein 1 subunit alpha OS=Bos taurus OX=9913 GN=TCP1 PE=1 SV=1	PREDICTED: T-complex protein 1 subunit alpha-like, partial [Lipotes vexillifer]
ONT.47.18	--	--	Molecular Function: binding (GO:0005488);; Cellular Component: cytoplasm (GO:0005737);; Cellular Component: intracellular non-membrane-bounded organelle (GO:0043232);; Cellular Component: intracellular organelle part (GO:0044446);;	K09493|9.62911e-51|bfo:BRAFLDRAFT_62187|K09493 T-complex protein 1 subunit alpha | (RefSeq) hypothetical protein	--	[O]	Posttranslational modification, protein turnover, chaperones	--	T-complex protein 1 subunit alpha OS=Macaca fascicularis OX=9541 GN=TCP1 PE=2 SV=1	T-complex protein 1 subunit alpha-like [Physeter catodon]
ONT.47.19	[O]	Posttranslational modification, protein turnover, chaperones	Cellular Component: pericentriolar material (GO:0000242);; Cellular Component: acrosomal vesicle (GO:0001669);; Cellular Component: zona pellucida receptor complex (GO:0002199);; Molecular Function: ATP binding (GO:0005524);; Cellular Component: nuclear heterochromatin (GO:0005720);; Cellular Component: Golgi apparatus (GO:0005794);; Cellular Component: chaperonin-containing T-complex (GO:0005832…	K09493|5.5573e-96|mmu:21454|K09493 T-complex protein 1 subunit alpha | (RefSeq) Tcp1, AI528772, CCT, Cct1, Ccta, TRic, Tcp-1, Tp63, c-cpn, p63; t-complex protein 1	--	[O]	Posttranslational modification, protein turnover, chaperones	TCP-1/cpn60 chaperonin family	T-complex protein 1 subunit alpha OS=Bos taurus OX=9913 GN=TCP1 PE=1 SV=1	T-complex protein 1 subunit alpha-like protein, partial [Equus caballus]
ONT.47.20	[O]	Posttranslational modification, protein turnover, chaperones	Cellular Component: pericentriolar material (GO:0000242);; Cellular Component: acrosomal vesicle (GO:0001669);; Cellular Component: zona pellucida receptor complex (GO:0002199);; Molecular Function: ATP binding (GO:0005524);; Cellular Component: nuclear heterochromatin (GO:0005720);; Cellular Component: Golgi apparatus (GO:0005794);; Cellular Component: chaperonin-containing T-complex (GO:0005832…	K09493|3.40903e-39|lve:103071317|K09493 T-complex protein 1 subunit alpha | (RefSeq) T-complex protein 1 subunit alpha-like	--	[O]	Posttranslational modification, protein turnover, chaperones	TCP-1/cpn60 chaperonin family	T-complex protein 1 subunit alpha OS=Bos taurus OX=9913 GN=TCP1 PE=1 SV=1	T-complex protein 1 subunit alpha-like protein, partial [Equus caballus]
ONT.49.1	--	--	Biological Process: regulation of alternative mRNA splicing, via spliceosome (GO:0000381);; Cellular Component: nuclear speck (GO:0016607);; Molecular Function: transferase activity, transferring acyl groups other than amino-acyl groups (GO:0016747);; Cellular Component: nuclear membrane (GO:0031965);; Cellular Component: MIS complex (GO:0036396);; Biological Process: mRNA methylation (GO:0080009…	--	--	[A]	RNA processing and modification	--	--	pre-mRNA-splicing regulator WTAP isoform X1 [Sus scrofa]
ONT.49.2	--	--	Biological Process: regulation of alternative mRNA splicing, via spliceosome (GO:0000381);; Cellular Component: nuclear speck (GO:0016607);; Molecular Function: transferase activity (GO:0016740);; Cellular Component: nuclear membrane (GO:0031965);; Cellular Component: MIS complex (GO:0036396);; Biological Process: mRNA methylation (GO:0080009);;	--	--	[A]	RNA processing and modification	--	--	pre-mRNA-splicing regulator WTAP isoform 1 [Sus scrofa]
ONT.50.2	--	--	Biological Process: regulation of alternative mRNA splicing, via spliceosome (GO:0000381);; Cellular Component: nuclear part (GO:0044428);; Biological Process: mRNA methylation (GO:0080009);;	--	--	[A]	RNA processing and modification	WTAP/Mum2p family;; WTAP/Mum2p family	--	PREDICTED: pre-mRNA-splicing regulator WTAP isoform X1 [Manis javanica]
ONT.50.3	--	--	Biological Process: regulation of alternative mRNA splicing, via spliceosome (GO:0000381);; Cellular Component: nuclear speck (GO:0016607);; Molecular Function: transferase activity, transferring acyl groups other than amino-acyl groups (GO:0016747);; Cellular Component: nuclear membrane (GO:0031965);; Cellular Component: MIS complex (GO:0036396);; Biological Process: mRNA methylation (GO:0080009…	--	--	[A]	RNA processing and modification	--	--	pre-mRNA-splicing regulator WTAP isoform X2 [Dasypus novemcinctus]
ONT.51.1	--	--	--	--	--	--	--	--	--	uncharacterized protein LOC102157641 [Sus scrofa]
ONT.51.2	--	--	--	--	--	--	--	--	--	uncharacterized protein LOC102157641 [Sus scrofa]
ONT.52.1	[P]	Inorganic ion transport and metabolism	Biological Process: age-dependent response to reactive oxygen species (GO:0001315);; Molecular Function: superoxide dismutase activity (GO:0004784);; Cellular Component: mitochondrion (GO:0005739);; Biological Process: regulation of transcription from RNA polymerase II promoter (GO:0006357);; Biological Process: superoxide metabolic process (GO:0006801);; Biological Process: mitochondrion organiz…	K04564|3.71148e-53|phd:102326739|K04564 superoxide dismutase, Fe-Mn family [EC:1.15.1.1] | (RefSeq) SOD2; superoxide dismutase 2	FoxO signaling pathway (ko04068);; Peroxisome (ko04146);; Longevity regulating pathway (ko04211);; Longevity regulating pathway - multiple species (ko04213);; Huntington's disease (ko05016)	[P]	Inorganic ion transport and metabolism	Iron/manganese superoxide dismutases, C-terminal domain	Superoxide dismutase [Mn], mitochondrial OS=Macaca nemestrina OX=9545 GN=SOD2 PE=2 SV=1	PREDICTED: superoxide dismutase [Mn], mitochondrial [Odobenus rosmarus divergens]
ONT.52.2	[P]	Inorganic ion transport and metabolism	Biological Process: response to reactive oxygen species (GO:0000302);; Biological Process: multicellular organism development (GO:0007275);; Biological Process: single-organism cellular process (GO:0044763);; Biological Process: regulation of cellular process (GO:0050794);; Biological Process: regulation of biological quality (GO:0065008);; Biological Process: reactive oxygen species metabolic pr…	K04564|7.65259e-32|ssc:100154319|K04564 superoxide dismutase, Fe-Mn family [EC:1.15.1.1] | (RefSeq) SOD2; superoxide dismutase 2	FoxO signaling pathway (ko04068);; Peroxisome (ko04146);; Longevity regulating pathway (ko04211);; Longevity regulating pathway - multiple species (ko04213);; Huntington's disease (ko05016)	[P]	Inorganic ion transport and metabolism	--	Superoxide dismutase [Mn], mitochondrial OS=Bos taurus OX=9913 GN=SOD2 PE=2 SV=1	superoxide dismutase [Mn], mitochondrial [Sus scrofa]
ONT.52.4	[P]	Inorganic ion transport and metabolism	Biological Process: age-dependent response to reactive oxygen species (GO:0001315);; Molecular Function: superoxide dismutase activity (GO:0004784);; Cellular Component: mitochondrion (GO:0005739);; Biological Process: regulation of transcription from RNA polymerase II promoter (GO:0006357);; Biological Process: mitochondrion organization (GO:0007005);; Biological Process: blood circulation (GO:0…	K04564|1.8189e-58|ssc:100154319|K04564 superoxide dismutase, Fe-Mn family [EC:1.15.1.1] | (RefSeq) SOD2; superoxide dismutase 2	FoxO signaling pathway (ko04068);; Peroxisome (ko04146);; Longevity regulating pathway (ko04211);; Longevity regulating pathway - multiple species (ko04213);; Huntington's disease (ko05016)	[P]	Inorganic ion transport and metabolism	Iron/manganese superoxide dismutases, alpha-hairpin domain	Superoxide dismutase [Mn], mitochondrial OS=Bos taurus OX=9913 GN=SOD2 PE=2 SV=1	superoxide dismutase [Mn], mitochondrial [Sus scrofa]
ONT.52.5	[P]	Inorganic ion transport and metabolism	Biological Process: response to superoxide (GO:0000303);; Biological Process: age-dependent response to oxidative stress (GO:0001306);; Molecular Function: superoxide dismutase activity (GO:0004784);; Biological Process: superoxide metabolic process (GO:0006801);; Biological Process: regulation of blood pressure (GO:0008217);; Biological Process: apoptotic mitochondrial changes (GO:0008637);; Mol…	K04564|1.85053e-49|apla:101794928|K04564 superoxide dismutase, Fe-Mn family [EC:1.15.1.1] | (RefSeq) SOD2, SODMn; superoxide dismutase 2	FoxO signaling pathway (ko04068);; Peroxisome (ko04146)	[P]	Inorganic ion transport and metabolism	--	Superoxide dismutase [Mn], mitochondrial OS=Macaca mulatta OX=9544 GN=SOD2 PE=2 SV=2	PREDICTED: superoxide dismutase [Mn], mitochondrial, partial [Bubalus bubalis]
ONT.52.7	[P]	Inorganic ion transport and metabolism	Biological Process: response to reactive oxygen species (GO:0000302);; Biological Process: superoxide metabolic process (GO:0006801);; Biological Process: apoptotic process (GO:0006915);; Biological Process: cellular nitrogen compound metabolic process (GO:0034641);; Cellular Component: cell part (GO:0044464);; Biological Process: system development (GO:0048731);; Biological Process: regulation o…	K04564|1.23479e-47|ssc:100154319|K04564 superoxide dismutase, Fe-Mn family [EC:1.15.1.1] | (RefSeq) SOD2; superoxide dismutase 2	FoxO signaling pathway (ko04068);; Peroxisome (ko04146);; Longevity regulating pathway (ko04211);; Longevity regulating pathway - multiple species (ko04213);; Huntington's disease (ko05016)	[P]	Inorganic ion transport and metabolism	Iron/manganese superoxide dismutases, alpha-hairpin domain	Superoxide dismutase [Mn], mitochondrial OS=Macaca mulatta OX=9544 GN=SOD2 PE=2 SV=2	superoxide dismutase [Mn], mitochondrial [Sus scrofa]
ONT.52.8	[P]	Inorganic ion transport and metabolism	Biological Process: response to superoxide (GO:0000303);; Biological Process: age-dependent response to oxidative stress (GO:0001306);; Biological Process: superoxide metabolic process (GO:0006801);; Biological Process: regulation of blood pressure (GO:0008217);; Biological Process: apoptotic mitochondrial changes (GO:0008637);; Molecular Function: oxidoreductase activity (GO:0016491);; Biologica…	K04564|1.88886e-50|bom:102283124|K04564 superoxide dismutase, Fe-Mn family [EC:1.15.1.1] | (RefSeq) SOD2; superoxide dismutase 2	FoxO signaling pathway (ko04068);; Peroxisome (ko04146);; Longevity regulating pathway (ko04211);; Longevity regulating pathway - multiple species (ko04213);; Huntington's disease (ko05016)	[P]	Inorganic ion transport and metabolism	Iron/manganese superoxide dismutases, alpha-hairpin domain	Superoxide dismutase [Mn], mitochondrial OS=Macaca mulatta OX=9544 GN=SOD2 PE=2 SV=2	PREDICTED: superoxide dismutase [Mn], mitochondrial [Galeopterus variegatus]
ONT.52.10	[P]	Inorganic ion transport and metabolism	Biological Process: age-dependent response to oxidative stress (GO:0001306);; Biological Process: release of cytochrome c from mitochondria (GO:0001836);; Biological Process: liver development (GO:0001889);; Biological Process: detection of oxygen (GO:0003032);; Biological Process: acetylcholine-mediated vasodilation involved in regulation of systemic arterial blood pressure (GO:0003069);; Molecu…	K04564|4.30689e-47|ssc:100154319|K04564 superoxide dismutase, Fe-Mn family [EC:1.15.1.1] | (RefSeq) SOD2; superoxide dismutase 2	FoxO signaling pathway (ko04068);; Peroxisome (ko04146);; Longevity regulating pathway (ko04211);; Longevity regulating pathway - multiple species (ko04213);; Huntington's disease (ko05016)	[P]	Inorganic ion transport and metabolism	Iron/manganese superoxide dismutases, C-terminal domain;; Iron/manganese superoxide dismutases, alpha-hairpin domain;; Iron/manganese superoxide dismutases, alpha-hairpin domain	Superoxide dismutase [Mn], mitochondrial (Fragment) OS=Sus scrofa OX=9823 GN=SOD2 PE=2 SV=1	RecName: Full=Superoxide dismutase [Mn], mitochondrial
ONT.52.11	[P]	Inorganic ion transport and metabolism	Biological Process: response to reactive oxygen species (GO:0000302);; Biological Process: multicellular organismal process (GO:0032501);; Biological Process: cellular metabolic process (GO:0044237);; Biological Process: single-organism cellular process (GO:0044763);; Biological Process: single-organism developmental process (GO:0044767);; Biological Process: regulation of cellular process (GO:00…	K04564|1.38763e-23|ssc:100154319|K04564 superoxide dismutase, Fe-Mn family [EC:1.15.1.1] | (RefSeq) SOD2; superoxide dismutase 2	FoxO signaling pathway (ko04068);; Peroxisome (ko04146);; Longevity regulating pathway (ko04211);; Longevity regulating pathway - multiple species (ko04213);; Huntington's disease (ko05016)	[P]	Inorganic ion transport and metabolism	--	Superoxide dismutase [Mn], mitochondrial OS=Bos taurus OX=9913 GN=SOD2 PE=2 SV=1	superoxide dismutase [Mn], mitochondrial [Sus scrofa]
ONT.52.12	[P]	Inorganic ion transport and metabolism	Biological Process: response to reactive oxygen species (GO:0000302);; Biological Process: age-dependent response to oxidative stress (GO:0001306);; Cellular Component: mitochondrion (GO:0005739);; Biological Process: superoxide metabolic process (GO:0006801);; Biological Process: mitochondrion organization (GO:0007005);; Biological Process: blood circulation (GO:0008015);; Biological Process: re…	K04564|4.97097e-52|ssc:100154319|K04564 superoxide dismutase, Fe-Mn family [EC:1.15.1.1] | (RefSeq) SOD2; superoxide dismutase 2	FoxO signaling pathway (ko04068);; Peroxisome (ko04146);; Longevity regulating pathway (ko04211);; Longevity regulating pathway - multiple species (ko04213);; Huntington's disease (ko05016)	[P]	Inorganic ion transport and metabolism	--	Superoxide dismutase [Mn], mitochondrial OS=Bos taurus OX=9913 GN=SOD2 PE=2 SV=1	PREDICTED: superoxide dismutase [Mn], mitochondrial [Ochotona princeps]
ONT.52.13	[P]	Inorganic ion transport and metabolism	Biological Process: age-dependent response to oxidative stress (GO:0001306);; Biological Process: release of cytochrome c from mitochondria (GO:0001836);; Biological Process: liver development (GO:0001889);; Biological Process: detection of oxygen (GO:0003032);; Biological Process: acetylcholine-mediated vasodilation involved in regulation of systemic arterial blood pressure (GO:0003069);; Molecu…	K04564|6.5421e-49|cjc:100410185|K04564 superoxide dismutase, Fe-Mn family [EC:1.15.1.1] | (RefSeq) SOD2; superoxide dismutase 2, mitochondrial	FoxO signaling pathway (ko04068);; Peroxisome (ko04146);; Longevity regulating pathway (ko04211);; Longevity regulating pathway - multiple species (ko04213);; Huntington's disease (ko05016)	[P]	Inorganic ion transport and metabolism	Iron/manganese superoxide dismutases, C-terminal domain	Superoxide dismutase [Mn], mitochondrial OS=Sapajus apella OX=9515 GN=SOD2 PE=2 SV=2	PREDICTED: superoxide dismutase [Mn], mitochondrial [Ochotona princeps]
ONT.52.14	[P]	Inorganic ion transport and metabolism	Biological Process: response to superoxide (GO:0000303);; Biological Process: age-dependent response to reactive oxygen species (GO:0001315);; Molecular Function: superoxide dismutase activity (GO:0004784);; Biological Process: regulation of transcription from RNA polymerase II promoter (GO:0006357);; Biological Process: superoxide metabolic process (GO:0006801);; Biological Process: regulation o…	K04564|6.0259e-54|ssc:100154319|K04564 superoxide dismutase, Fe-Mn family [EC:1.15.1.1] | (RefSeq) SOD2; superoxide dismutase 2	FoxO signaling pathway (ko04068);; Peroxisome (ko04146);; Longevity regulating pathway (ko04211);; Longevity regulating pathway - multiple species (ko04213);; Huntington's disease (ko05016)	[P]	Inorganic ion transport and metabolism	Iron/manganese superoxide dismutases, alpha-hairpin domain	Superoxide dismutase [Mn], mitochondrial OS=Bos taurus OX=9913 GN=SOD2 PE=2 SV=1	superoxide dismutase [Mn], mitochondrial [Sus scrofa]
ONT.52.16	[P]	Inorganic ion transport and metabolism	Biological Process: response to reactive oxygen species (GO:0000302);; Biological Process: apoptotic process (GO:0006915);; Molecular Function: oxidoreductase activity (GO:0016491);; Cellular Component: cell part (GO:0044464);; Molecular Function: metal ion binding (GO:0046872);; Biological Process: system development (GO:0048731);; Biological Process: regulation of cellular process (GO:0050794);…	K04564|2.48425e-48|ptr:449634|K04564 superoxide dismutase, Fe-Mn family [EC:1.15.1.1] | (RefSeq) SOD2; superoxide dismutase 2	FoxO signaling pathway (ko04068);; Peroxisome (ko04146);; Longevity regulating pathway (ko04211);; Longevity regulating pathway - multiple species (ko04213);; Huntington's disease (ko05016)	[P]	Inorganic ion transport and metabolism	--	Superoxide dismutase [Mn], mitochondrial OS=Macaca mulatta OX=9544 GN=SOD2 PE=2 SV=2	PREDICTED: superoxide dismutase [Mn], mitochondrial [Vicugna pacos]
ONT.52.17	[P]	Inorganic ion transport and metabolism	Biological Process: age-dependent response to reactive oxygen species (GO:0001315);; Molecular Function: superoxide dismutase activity (GO:0004784);; Cellular Component: mitochondrion (GO:0005739);; Biological Process: regulation of transcription from RNA polymerase II promoter (GO:0006357);; Biological Process: superoxide metabolic process (GO:0006801);; Biological Process: mitochondrion organiz…	K04564|6.44232e-50|ssc:100154319|K04564 superoxide dismutase, Fe-Mn family [EC:1.15.1.1] | (RefSeq) SOD2; superoxide dismutase 2	FoxO signaling pathway (ko04068);; Peroxisome (ko04146);; Longevity regulating pathway (ko04211);; Longevity regulating pathway - multiple species (ko04213);; Huntington's disease (ko05016)	[P]	Inorganic ion transport and metabolism	--	Superoxide dismutase [Mn], mitochondrial OS=Bos taurus OX=9913 GN=SOD2 PE=2 SV=1	superoxide dismutase [Mn], mitochondrial [Sus scrofa]
ONT.52.19	[P]	Inorganic ion transport and metabolism	Biological Process: age-dependent response to reactive oxygen species (GO:0001315);; Molecular Function: superoxide dismutase activity (GO:0004784);; Cellular Component: mitochondrion (GO:0005739);; Biological Process: regulation of transcription from RNA polymerase II promoter (GO:0006357);; Biological Process: superoxide metabolic process (GO:0006801);; Biological Process: mitochondrion organiz…	K04564|5.04604e-35|mmu:20656|K04564 superoxide dismutase, Fe-Mn family [EC:1.15.1.1] | (RefSeq) Sod2, MnSOD, Sod-2; superoxide dismutase 2, mitochondrial	FoxO signaling pathway (ko04068);; Peroxisome (ko04146);; Longevity regulating pathway (ko04211);; Longevity regulating pathway - multiple species (ko04213);; Huntington's disease (ko05016)	[P]	Inorganic ion transport and metabolism	Iron/manganese superoxide dismutases, C-terminal domain	Superoxide dismutase [Mn], mitochondrial OS=Macaca nemestrina OX=9545 GN=SOD2 PE=2 SV=1	PREDICTED: superoxide dismutase [Mn], mitochondrial isoform X1 [Mustela putorius furo]
ONT.52.20	--	--	--	K04564|1.96915e-07|bom:102283124|K04564 superoxide dismutase, Fe-Mn family [EC:1.15.1.1] | (RefSeq) SOD2; superoxide dismutase 2	FoxO signaling pathway (ko04068);; Peroxisome (ko04146);; Longevity regulating pathway (ko04211);; Longevity regulating pathway - multiple species (ko04213);; Huntington's disease (ko05016)	[P]	Inorganic ion transport and metabolism	--	Superoxide dismutase [Mn], mitochondrial OS=Bos taurus OX=9913 GN=SOD2 PE=2 SV=1	PREDICTED: superoxide dismutase [Mn], mitochondrial isoform X1 [Bos mutus]
ONT.53.1	--	--	--	--	--	--	--	--	--	--
ONT.55.1	--	--	--	--	--	--	--	--	--	--
ONT.59.1	--	--	Molecular Function: calcium ion binding (GO:0005509);; Molecular Function: calcium-dependent phospholipid binding (GO:0005544);; Cellular Component: plasma membrane (GO:0005886);; Biological Process: vesicle fusion (GO:0006906);; Biological Process: regulation of calcium ion-dependent exocytosis (GO:0017158);; Molecular Function: syntaxin binding (GO:0019905);; Molecular Function: clathrin bindin…	K17598|9.88042e-27|ssc:100156434|K17598 synaptotagmin-like protein | (RefSeq) SYTL3; synaptotagmin like 3	--	[TU]	Signal transduction mechanisms;; Intracellular trafficking, secretion, and vesicular transport	--	--	synaptotagmin-like protein 3 [Sus scrofa]
ONT.60.1	--	--	Cellular Component: intracellular (GO:0005622);; Biological Process: intracellular transport of viral protein in host cell (GO:0019060);; Molecular Function: identical protein binding (GO:0042802);; Cellular Component: host cell (GO:0043657);;	K10420|3.40675e-77|ocu:100339491|K10420 dynein light chain Tctex-type 1 | (RefSeq) DYNLT1; dynein light chain Tctex-type 1	--	[N]	Cell motility	Tctex-1 family	Dynein light chain Tctex-type 1 OS=Bos taurus OX=9913 GN=DYNLT1 PE=1 SV=1	PREDICTED: dynein light chain Tctex-type 1 [Camelus bactrianus]
ONT.60.2	--	--	Biological Process: establishment of mitotic spindle orientation (GO:0000132);; Molecular Function: motor activity (GO:0003774);; Cellular Component: Golgi apparatus (GO:0005794);; Cellular Component: spindle (GO:0005819);; Cellular Component: cytoplasmic dynein complex (GO:0005868);; Cellular Component: microtubule (GO:0005874);; Biological Process: mitotic cell cycle (GO:0007067);; Biological P…	K10420|3.08069e-35|ocu:100339491|K10420 dynein light chain Tctex-type 1 | (RefSeq) DYNLT1; dynein light chain Tctex-type 1	--	[N]	Cell motility	Tctex-1 family	Dynein light chain Tctex-type 1 OS=Bos taurus OX=9913 GN=DYNLT1 PE=1 SV=1	PREDICTED: dynein light chain Tctex-type 1 [Camelus bactrianus]
ONT.60.3	--	--	Cellular Component: intracellular (GO:0005622);; Biological Process: intracellular transport of viral protein in host cell (GO:0019060);; Molecular Function: identical protein binding (GO:0042802);; Cellular Component: host cell (GO:0043657);;	K10420|1.19688e-26|ssc:100158053|K10420 dynein light chain Tctex-type 1 | (RefSeq) DYNLT1; dynein light chain Tctex-type 1	--	[N]	Cell motility	--	Dynein light chain Tctex-type 1 OS=Bos taurus OX=9913 GN=DYNLT1 PE=1 SV=1	PREDICTED: dynein light chain Tctex-type 1 isoform X1 [Eptesicus fuscus]
ONT.60.4	--	--	Biological Process: establishment of mitotic spindle orientation (GO:0000132);; Molecular Function: motor activity (GO:0003774);; Cellular Component: Golgi apparatus (GO:0005794);; Cellular Component: spindle (GO:0005819);; Cellular Component: cytoplasmic dynein complex (GO:0005868);; Cellular Component: microtubule (GO:0005874);; Biological Process: mitotic cell cycle (GO:0007067);; Biological P…	K10420|3.38098e-39|nle:100598597|K10420 dynein light chain Tctex-type 1 | (RefSeq) DYNLT1; dynein light chain Tctex-type 1	--	[N]	Cell motility	Tctex-1 family	Dynein light chain Tctex-type 1 OS=Bos taurus OX=9913 GN=DYNLT1 PE=1 SV=1	dynein light chain Tctex-type 1 [Sus scrofa]
ONT.60.6	--	--	--	K10420|9.72943e-25|oas:101110149|K10420 dynein light chain Tctex-type 1 | (RefSeq) DYNLT1; dynein light chain Tctex-type 1	--	[N]	Cell motility	--	Dynein light chain Tctex-type 1 OS=Bos taurus OX=9913 GN=DYNLT1 PE=1 SV=1	PREDICTED: dynein light chain Tctex-type 1 isoform X1 [Ovis aries]
ONT.60.7	--	--	--	K10420|1.68944e-13|myb:102246905|K10420 dynein light chain Tctex-type 1 | (RefSeq) dynein light chain Tctex-type 1	--	[N]	Cell motility	--	Dynein light chain Tctex-type 1 OS=Bos taurus OX=9913 GN=DYNLT1 PE=1 SV=1	PREDICTED: dynein light chain Tctex-type 1 [Myotis brandtii]
ONT.60.8	--	--	Cellular Component: intracellular (GO:0005622);; Biological Process: intracellular transport of viral protein in host cell (GO:0019060);; Molecular Function: identical protein binding (GO:0042802);; Cellular Component: host cell (GO:0043657);;	K10420|1.60989e-64|ssc:100158053|K10420 dynein light chain Tctex-type 1 | (RefSeq) DYNLT1; dynein light chain Tctex-type 1	--	[N]	Cell motility	Tctex-1 family	Dynein light chain Tctex-type 1 OS=Bos taurus OX=9913 GN=DYNLT1 PE=1 SV=1	PREDICTED: dynein light chain Tctex-type 1 [Camelus bactrianus]
ONT.60.10	--	--	--	K10420|9.7489e-11|ecb:100059508|K10420 dynein light chain Tctex-type 1 | (RefSeq) DYNLT1; dynein light chain Tctex-type 1	--	[N]	Cell motility	Tctex-1 family	Dynein light chain Tctex-type 1 OS=Bos taurus OX=9913 GN=DYNLT1 PE=1 SV=1	PREDICTED: dynein light chain Tctex-type 1 [Camelus bactrianus]
ONT.60.11	--	--	Cellular Component: intracellular (GO:0005622);; Biological Process: intracellular transport of viral protein in host cell (GO:0019060);; Molecular Function: identical protein binding (GO:0042802);; Cellular Component: host cell (GO:0043657);;	K10420|1.19292e-37|lve:103090823|K10420 dynein light chain Tctex-type 1 | (RefSeq) dynein light chain Tctex-type 1-like	--	[N]	Cell motility	Tctex-1 family	Dynein light chain Tctex-type 1 OS=Bos taurus OX=9913 GN=DYNLT1 PE=1 SV=1	PREDICTED: dynein light chain Tctex-type 1-like [Lipotes vexillifer]
ONT.60.12	--	--	Cellular Component: intracellular (GO:0005622);; Biological Process: intracellular transport of viral protein in host cell (GO:0019060);; Molecular Function: identical protein binding (GO:0042802);; Cellular Component: host cell (GO:0043657);;	K10420|1.4143e-37|ssc:100158053|K10420 dynein light chain Tctex-type 1 | (RefSeq) DYNLT1; dynein light chain Tctex-type 1	--	[N]	Cell motility	--	Dynein light chain Tctex-type 1 OS=Bos taurus OX=9913 GN=DYNLT1 PE=1 SV=1	PREDICTED: dynein light chain Tctex-type 1 [Camelus bactrianus]
ONT.60.14	--	--	Biological Process: transport (GO:0006810);; Cellular Component: microtubule cytoskeleton (GO:0015630);; Cellular Component: cytoskeletal part (GO:0044430);; Biological Process: single-organism cellular process (GO:0044763);; Biological Process: cellular localization (GO:0051641);;	K10420|8.45935e-18|ssc:100158053|K10420 dynein light chain Tctex-type 1 | (RefSeq) DYNLT1; dynein light chain Tctex-type 1	--	[N]	Cell motility	Tctex-1 family	Dynein light chain Tctex-type 1 OS=Bos taurus OX=9913 GN=DYNLT1 PE=1 SV=1	dynein light chain Tctex-type 1 [Sus scrofa]
ONT.60.15	--	--	--	--	--	[N]	Cell motility	--	Dynein light chain Tctex-type 1 OS=Bos taurus OX=9913 GN=DYNLT1 PE=1 SV=1	--
ONT.60.16	--	--	Cellular Component: intracellular (GO:0005622);; Biological Process: intracellular transport of viral protein in host cell (GO:0019060);; Molecular Function: identical protein binding (GO:0042802);; Cellular Component: host cell (GO:0043657);;	K10420|2.34298e-51|rro:104676656|K10420 dynein light chain Tctex-type 1 | (RefSeq) DYNLT1; dynein light chain Tctex-type 1	--	[N]	Cell motility	Tctex-1 family	Dynein light chain Tctex-type 1 OS=Bos taurus OX=9913 GN=DYNLT1 PE=1 SV=1	PREDICTED: dynein light chain Tctex-type 1 isoform X1 [Orcinus orca]
ONT.60.17	--	--	Cellular Component: intracellular (GO:0005622);; Biological Process: intracellular transport of viral protein in host cell (GO:0019060);; Molecular Function: identical protein binding (GO:0042802);; Cellular Component: host cell (GO:0043657);;	K10420|4.68295e-57|rno:83462|K10420 dynein light chain Tctex-type 1 | (RefSeq) Dynlt1, AGS2, Tctex1; dynein light chain Tctex-type 1	--	[N]	Cell motility	Tctex-1 family	Dynein light chain Tctex-type 1 OS=Bos taurus OX=9913 GN=DYNLT1 PE=1 SV=1	PREDICTED: dynein light chain Tctex-type 1 isoform X2 [Orycteropus afer afer]
ONT.60.18	--	--	--	K10420|1.87187e-13|rro:104676656|K10420 dynein light chain Tctex-type 1 | (RefSeq) DYNLT1; dynein light chain Tctex-type 1	--	[N]	Cell motility	Tctex-1 family	Dynein light chain Tctex-type 1 OS=Bos taurus OX=9913 GN=DYNLT1 PE=1 SV=1	PREDICTED: dynein light chain Tctex-type 1 isoform X1 [Oryctolagus cuniculus]
ONT.60.19	--	--	--	K10420|1.13168e-42|myb:102249025|K10420 dynein light chain Tctex-type 1 | (RefSeq) dynein light chain Tctex-type 1	--	[N]	Cell motility	--	Dynein light chain Tctex-type 1 OS=Bos taurus OX=9913 GN=DYNLT1 PE=1 SV=1	PREDICTED: dynein light chain Tctex-type 1 [Myotis brandtii]
ONT.60.20	--	--	Cellular Component: intracellular (GO:0005622);; Biological Process: intracellular transport of viral protein in host cell (GO:0019060);; Molecular Function: identical protein binding (GO:0042802);; Cellular Component: host cell (GO:0043657);;	K10420|3.83539e-31|mmu:21648|K10420 dynein light chain Tctex-type 1 | (RefSeq) Dynlt1b, AGS2, Dynlt1, Tctex-1, Tctex1; dynein light chain Tctex-type 1B	--	[N]	Cell motility	--	Dynein light chain Tctex-type 1 OS=Bos taurus OX=9913 GN=DYNLT1 PE=1 SV=1	PREDICTED: dynein light chain Tctex-type 1 isoform X1 [Eptesicus fuscus]
ONT.60.21	--	--	Cellular Component: cytoplasmic dynein complex (GO:0005868);; Biological Process: cell cycle (GO:0007049);; Biological Process: intracellular transport of viral protein in host cell (GO:0019060);; Molecular Function: identical protein binding (GO:0042802);; Biological Process: Golgi to plasma membrane protein transport (GO:0043001);; Cellular Component: host cell (GO:0043657);;	K10420|1.24344e-52|myb:102249025|K10420 dynein light chain Tctex-type 1 | (RefSeq) dynein light chain Tctex-type 1	--	[N]	Cell motility	Tctex-1 family	Dynein light chain Tctex-type 1 OS=Bos taurus OX=9913 GN=DYNLT1 PE=1 SV=1	PREDICTED: dynein light chain Tctex-type 1 [Myotis brandtii]
ONT.60.22	--	--	Cellular Component: intracellular (GO:0005622);; Biological Process: intracellular transport of viral protein in host cell (GO:0019060);; Molecular Function: identical protein binding (GO:0042802);; Cellular Component: host cell (GO:0043657);;	K10420|6.35883e-16|rro:104676656|K10420 dynein light chain Tctex-type 1 | (RefSeq) DYNLT1; dynein light chain Tctex-type 1	--	[N]	Cell motility	Tctex-1 family	Dynein light chain Tctex-type 1 OS=Bos taurus OX=9913 GN=DYNLT1 PE=1 SV=1	Dynein light chain Tctex-type 1 [Tupaia chinensis]
ONT.61.1	--	--	--	--	--	--	--	--	--	--
ONT.62.1	--	--	--	--	--	--	--	--	--	--
ONT.64.1	--	--	--	--	--	--	--	--	--	--
ONT.65.1	--	--	Cellular Component: membrane (GO:0016020);; Cellular Component: membrane-bounded organelle (GO:0043227);; Cellular Component: intracellular organelle (GO:0043229);; Cellular Component: cytoplasmic part (GO:0044444);;	--	--	--	--	--	--	probable phospholipid-transporting ATPase IF isoform X9 [Sus scrofa]
ONT.66.1	--	--	--	--	--	--	--	--	--	--
ONT.66.7	--	--	Molecular Function: rDNA binding (GO:0000182);; Cellular Component: core TFIIH complex (GO:0000439);; Cellular Component: nucleolus (GO:0005730);; Biological Process: nucleotide-excision repair, preincision complex assembly (GO:0006294);; Biological Process: regulation of transcription, DNA-templated (GO:0006355);; Biological Process: transcription elongation from RNA polymerase I promoter (GO:00…	K10845|4.79578e-49|chx:102180044|K10845 TFIIH basal transcription factor complex TTD-A subunit | (RefSeq) GTF2H5; general transcription factor IIH subunit 5	Basal transcription factors (ko03022);; Nucleotide excision repair (ko03420)	[S]	Function unknown	Transcription factor TFIIH complex subunit Tfb5	General transcription factor IIH subunit 5 OS=Bos taurus OX=9913 GN=GTF2H5 PE=3 SV=1	PREDICTED: general transcription factor IIH subunit 5 isoform X2 [Ovis aries musimon]
ONT.66.10	--	--	Molecular Function: rDNA binding (GO:0000182);; Cellular Component: core TFIIH complex (GO:0000439);; Cellular Component: nucleolus (GO:0005730);; Biological Process: nucleotide-excision repair, preincision complex assembly (GO:0006294);; Biological Process: regulation of transcription, DNA-templated (GO:0006355);; Biological Process: transcription elongation from RNA polymerase I promoter (GO:00…	K10845|9.6327e-34|chx:102180044|K10845 TFIIH basal transcription factor complex TTD-A subunit | (RefSeq) GTF2H5; general transcription factor IIH subunit 5	Basal transcription factors (ko03022);; Nucleotide excision repair (ko03420)	[S]	Function unknown	--	General transcription factor IIH subunit 5 OS=Bos taurus OX=9913 GN=GTF2H5 PE=3 SV=1	PREDICTED: general transcription factor IIH subunit 5 isoform X2 [Ovis aries musimon]
ONT.66.13	--	--	Biological Process: nucleotide-excision repair (GO:0006289);; Biological Process: transcription, DNA-templated (GO:0006351);; Biological Process: cellular component biogenesis (GO:0044085);; Cellular Component: nuclear part (GO:0044428);;	K10845|8.67907e-25|chx:102180044|K10845 TFIIH basal transcription factor complex TTD-A subunit | (RefSeq) GTF2H5; general transcription factor IIH subunit 5	Basal transcription factors (ko03022);; Nucleotide excision repair (ko03420)	--	--	--	General transcription factor IIH subunit 5 OS=Bos taurus OX=9913 GN=GTF2H5 PE=3 SV=1	PREDICTED: general transcription factor IIH subunit 5 isoform X1 [Capra hircus]
ONT.67.1	--	--	Cellular Component: intracellular organelle (GO:0043229);; Biological Process: single-organism cellular process (GO:0044763);; Biological Process: system development (GO:0048731);;	--	--	--	--	--	--	cullin-7 isoform X1 [Sus scrofa]
ONT.67.3	--	--	--	--	--	--	--	--	--	--
ONT.69.1	--	--	Biological Process: mitotic cytokinesis (GO:0000281);; Molecular Function: 1-phosphatidylinositol binding (GO:0005545);; Cellular Component: endosome (GO:0005768);; Cellular Component: trans-Golgi network (GO:0005802);; Biological Process: intracellular protein transport (GO:0006886);; Biological Process: receptor-mediated endocytosis (GO:0006898);; Biological Process: mitotic cell cycle (GO:0007…	--	--	[U]	Intracellular trafficking, secretion, and vesicular transport	WASP-binding domain of Sorting nexin protein	--	Sorting nexin-9 [Tupaia chinensis]
ONT.70.1	--	--	--	--	--	--	--	--	--	--
ONT.71.1	--	--	Cellular Component: integral component of membrane (GO:0016021);;	--	--	--	--	Protein of unknown function (DUF1358)	Transmembrane protein 242 OS=Pongo abelii OX=9601 GN=TMEM242 PE=2 SV=1	transmembrane protein 242 [Sus scrofa]
ONT.71.2	--	--	Cellular Component: integral component of membrane (GO:0016021);;	--	--	--	--	Protein of unknown function (DUF1358)	Transmembrane protein 242 OS=Pongo abelii OX=9601 GN=TMEM242 PE=2 SV=1	transmembrane protein 242 [Sus scrofa]
ONT.71.5	--	--	Cellular Component: integral component of membrane (GO:0016021);;	--	--	--	--	--	Transmembrane protein 242 OS=Pongo abelii OX=9601 GN=TMEM242 PE=2 SV=1	PREDICTED: transmembrane protein 242 [Manis javanica]
ONT.71.8	--	--	Cellular Component: membrane (GO:0016020);;	--	--	--	--	Protein of unknown function (DUF1358)	Transmembrane protein 242 OS=Pongo abelii OX=9601 GN=TMEM242 PE=2 SV=1	transmembrane protein 242 [Sus scrofa]
ONT.72.1	--	--	--	--	--	--	--	--	--	--
ONT.74.1	--	--	Biological Process: negative regulation of transcription from RNA polymerase II promoter (GO:0000122);; Cellular Component: nuclear chromatin (GO:0000790);; Biological Process: neural tube closure (GO:0001843);; Biological Process: cardiac chamber development (GO:0003205);; Biological Process: optic cup formation involved in camera-type eye development (GO:0003408);; Molecular Function: DNA bindi…	K11653|1.86062e-91|mgp:100545722|K11653 AT-rich interactive domain-containing protein 1 | (RefSeq) ARID1B; AT-rich interaction domain 1B	--	[B]	Chromatin structure and dynamics	SWI/SNF-like complex subunit BAF250/Osa	--	AT-rich interactive domain-containing protein 1B [Tupaia chinensis]
ONT.76.1	[J]	Translation, ribosomal structure and biogenesis	Molecular Function: rRNA (adenine-N6,N6-)-dimethyltransferase activity (GO:0000179);; Cellular Component: mitochondrion (GO:0005739);; Biological Process: rRNA methylation (GO:0031167);;	K15266|8.65459e-50|pale:102884751|K15266 dimethyladenosine transferase 1, mitochondrial [EC:2.1.1.-] | (RefSeq) TFB1M; transcription factor B1, mitochondrial	--	[A]	RNA processing and modification	--	Mitochondrial dimethyladenosine transferase 1 OS=Bos taurus OX=9913 GN=TFB1M PE=2 SV=2	Dimethyladenosine transferase 1, mitochondrial [Tupaia chinensis]
ONT.76.2	[J]	Translation, ribosomal structure and biogenesis	Molecular Function: rRNA (adenine-N6,N6-)-dimethyltransferase activity (GO:0000179);; Molecular Function: DNA binding (GO:0003677);; Biological Process: regulation of transcription, DNA-templated (GO:0006355);; Biological Process: rRNA methylation (GO:0031167);; Cellular Component: mitochondrial nucleoid (GO:0042645);; Molecular Function: RNA binding (GO:0044822);;	K15266|0|ssc:100147809|K15266 dimethyladenosine transferase 1, mitochondrial [EC:2.1.1.-] | (RefSeq) TFB1M, CGI-75; transcription factor B1, mitochondrial	--	[A]	RNA processing and modification	Ribosomal RNA adenine dimethylase;; Ribosomal RNA adenine dimethylase	Mitochondrial dimethyladenosine transferase 1 OS=Bos taurus OX=9913 GN=TFB1M PE=2 SV=2	dimethyladenosine transferase 1, mitochondrial [Sus scrofa]
ONT.76.3	[J]	Translation, ribosomal structure and biogenesis	Cellular Component: mitochondrial matrix (GO:0005759);; Biological Process: metabolic process (GO:0008152);; Molecular Function: rRNA methyltransferase activity (GO:0008649);;	K15266|8.90787e-53|ssc:100147809|K15266 dimethyladenosine transferase 1, mitochondrial [EC:2.1.1.-] | (RefSeq) TFB1M, CGI-75; transcription factor B1, mitochondrial	--	[A]	RNA processing and modification	--	Mitochondrial dimethyladenosine transferase 1 OS=Bos taurus OX=9913 GN=TFB1M PE=2 SV=2	Dimethyladenosine transferase 1, mitochondrial [Tupaia chinensis]
ONT.76.5	--	--	Molecular Function: rRNA (adenine-N6,N6-)-dimethyltransferase activity (GO:0000179);; Molecular Function: nucleic acid binding (GO:0003676);; Cellular Component: mitochondrial matrix (GO:0005759);; Biological Process: rRNA processing (GO:0006364);;	K15266|4.57967e-15|ssc:100147809|K15266 dimethyladenosine transferase 1, mitochondrial [EC:2.1.1.-] | (RefSeq) TFB1M, CGI-75; transcription factor B1, mitochondrial	--	[A]	RNA processing and modification	--	Mitochondrial dimethyladenosine transferase 1 OS=Bos taurus OX=9913 GN=TFB1M PE=2 SV=2	dimethyladenosine transferase 1, mitochondrial isoform X1 [Sus scrofa]
ONT.78.1	--	--	--	--	--	--	--	--	--	--
ONT.80.1	--	--	Cellular Component: membrane-bounded organelle (GO:0043227);; Biological Process: primary metabolic process (GO:0044238);; Biological Process: cellular macromolecule metabolic process (GO:0044260);; Cellular Component: intracellular part (GO:0044424);; Biological Process: biological regulation (GO:0065007);; Biological Process: organic substance biosynthetic process (GO:1901576);;	--	--	--	--	--	--	CREB-regulated transcription coactivator 2 isoform X3 [Sus scrofa]
ONT.81.1	--	--	--	--	--	--	--	--	--	--
ONT.83.1	--	--	--	--	--	--	--	--	--	--
ONT.84.3	[J]	Translation, ribosomal structure and biogenesis	Molecular Function: translation release factor activity (GO:0003747);; Cellular Component: cytoplasm (GO:0005737);; Biological Process: translational termination (GO:0006415);;	K02835|1.50222e-125|ssc:100514202|K02835 peptide chain release factor 1 | (RefSeq) MTRF1L; mitochondrial translational release factor 1 like	--	[J]	Translation, ribosomal structure and biogenesis	PCRF domain;; RF-1 domain	Peptide chain release factor 1-like, mitochondrial OS=Bos taurus OX=9913 GN=MTRF1L PE=2 SV=1	peptide chain release factor 1-like, mitochondrial [Sus scrofa]
ONT.84.4	[J]	Translation, ribosomal structure and biogenesis	Cellular Component: mitochondrion (GO:0005739);; Molecular Function: translation release factor activity, codon specific (GO:0016149);; Molecular Function: ribosome binding (GO:0043022);; Biological Process: mitochondrial translational termination (GO:0070126);;	K02835|3.56819e-156|ssc:100514202|K02835 peptide chain release factor 1 | (RefSeq) MTRF1L; mitochondrial translational release factor 1 like	--	[J]	Translation, ribosomal structure and biogenesis	RF-1 domain;; PCRF domain	Peptide chain release factor 1-like, mitochondrial OS=Bos taurus OX=9913 GN=MTRF1L PE=2 SV=1	peptide chain release factor 1-like, mitochondrial [Sus scrofa]
ONT.85.1	--	--	--	--	--	--	--	--	--	--
ONT.86.1	--	--	Cellular Component: integral component of membrane (GO:0016021);;	--	--	--	--	--	--	myc target protein 1 [Sus scrofa]
ONT.87.2	--	--	Cellular Component: integral component of membrane (GO:0016021);;	--	--	--	--	Myc target protein 1	--	myc target protein 1 [Sus scrofa]
ONT.88.1	--	--	Molecular Function: binding (GO:0005488);; Cellular Component: nucleus (GO:0005634);; Biological Process: organelle organization (GO:0006996);; Biological Process: anatomical structure morphogenesis (GO:0009653);; Biological Process: cell differentiation (GO:0030154);; Cellular Component: macromolecular complex (GO:0032991);; Biological Process: cellular protein metabolic process (GO:0044267);; C…	--	--	--	--	--	--	cullin-7 isoform X1 [Sus scrofa]
ONT.89.1	--	--	Molecular Function: lamin binding (GO:0005521);; Cellular Component: nucleoplasm (GO:0005654);; Cellular Component: Golgi apparatus (GO:0005794);; Biological Process: Golgi organization (GO:0007030);; Cellular Component: integral component of membrane (GO:0016021);; Cellular Component: sarcomere (GO:0030017);; Cellular Component: nuclear membrane (GO:0031965);; Cellular Component: LINC complex (G…	K19326|1.01771e-61|ssc:100157427|K19326 nesprin-1 | (RefSeq) nesprin-1-like	--	--	--	--	--	LOW QUALITY PROTEIN: nesprin-1 [Sus scrofa]
ONT.90.1	--	--	--	--	--	--	--	--	--	--
ONT.90.2	--	--	--	--	--	--	--	--	--	--
ONT.90.3	--	--	--	--	--	--	--	--	--	--
ONT.90.7	--	--	--	--	--	--	--	--	--	--
ONT.90.8	--	--	--	--	--	--	--	--	--	--
ONT.90.9	--	--	--	--	--	--	--	--	--	--
ONT.90.10	--	--	--	--	--	--	--	--	--	--
ONT.91.2	--	--	Molecular Function: protein binding (GO:0005515);; Cellular Component: nuclear envelope (GO:0005635);; Cellular Component: cytoplasm (GO:0005737);; Biological Process: organelle organization (GO:0006996);; Cellular Component: membrane (GO:0016020);; Biological Process: single-organism cellular process (GO:0044763);; Biological Process: cellular localization (GO:0051641);;	--	--	[Z]	Cytoskeleton	--	--	PREDICTED: nesprin-1 [Eptesicus fuscus]
ONT.91.3	--	--	--	K19326|1.68773e-13|ssc:100737638|K19326 nesprin-1 | (RefSeq) nesprin-1	--	[Z]	Cytoskeleton	Nuclear envelope localisation domain	--	LOW QUALITY PROTEIN: nesprin-1 [Sus scrofa]
ONT.91.4	--	--	--	K19326|2.6137e-10|ssc:100737638|K19326 nesprin-1 | (RefSeq) nesprin-1	--	[Z]	Cytoskeleton	--	--	LOW QUALITY PROTEIN: nesprin-1 [Sus scrofa]
ONT.92.1	[S]	Function unknown	Biological Process: protein methylation (GO:0006479);; Molecular Function: S-adenosylmethionine-dependent methyltransferase activity (GO:0008757);; Molecular Function: protein carboxyl O-methyltransferase activity (GO:0051998);; Biological Process: regulation of response to DNA damage stimulus (GO:2001020);;	--	--	[S]	Function unknown	Protein of unknown function DUF89;; Protein of unknown function DUF89;; Protein of unknown function DUF89	Protein-glutamate O-methyltransferase OS=Bos taurus OX=9913 GN=ARMT1 PE=2 SV=1	protein-glutamate O-methyltransferase [Sus scrofa]
ONT.93.1	--	--	Cellular Component: membrane (GO:0016020);;	--	--	[S]	Function unknown	Uncharacterised ACR, YagE family COG1723	Required for meiotic nuclear division protein 1 homolog OS=Pongo abelii OX=9601 GN=RMND1 PE=2 SV=1	required for meiotic nuclear division protein 1 homolog [Sus scrofa]
ONT.93.2	[S]	Function unknown	--	--	--	[S]	Function unknown	Uncharacterised ACR, YagE family COG1723	Required for meiotic nuclear division protein 1 homolog OS=Pongo abelii OX=9601 GN=RMND1 PE=2 SV=1	required for meiotic nuclear division protein 1 homolog [Sus scrofa]
ONT.94.1	--	--	--	--	--	--	--	--	--	--
ONT.95.1	[F]	Nucleotide transport and metabolism	Biological Process: neural tube closure (GO:0001843);; Molecular Function: formate-tetrahydrofolate ligase activity (GO:0004329);; Molecular Function: methenyltetrahydrofolate cyclohydrolase activity (GO:0004477);; Molecular Function: methylenetetrahydrofolate dehydrogenase (NADP+) activity (GO:0004488);; Molecular Function: ATP binding (GO:0005524);; Cellular Component: mitochondrion (GO:0005739…	K13402|1.66488e-30|ssc:100154722|K13402 monofunctional C1-tetrahydrofolate synthase, mitochondrial [EC:6.3.4.3] | (RefSeq) MTHFD1L; methylenetetrahydrofolate dehydrogenase (NADP+ dependent) 1-like	One carbon pool by folate (ko00670)	[H]	Coenzyme transport and metabolism	--	Monofunctional C1-tetrahydrofolate synthase, mitochondrial OS=Bos taurus OX=9913 GN=MTHFD1L PE=2 SV=2	monofunctional C1-tetrahydrofolate synthase, mitochondrial [Myotis lucifugus]
ONT.96.1	--	--	--	--	--	--	--	--	--	--
ONT.97.1	[C]	Energy production and conversion	Molecular Function: iodide peroxidase activity (GO:0004447);;	K17231|3.93387e-34|aml:100476845|K17231 iodotyrosine deiodinase [EC:1.21.1.1] | (RefSeq) IYD; iodotyrosine deiodinase	Thyroid hormone synthesis (ko04918)	[C]	Energy production and conversion	--	Iodotyrosine deiodinase 1 OS=Sus scrofa OX=9823 GN=IYD PE=1 SV=1	PREDICTED: iodotyrosine deiodinase 1 [Ailuropoda melanoleuca]
ONT.98.1	--	--	--	--	--	--	--	--	--	--
ONT.99.4	--	--	Molecular Function: protein serine/threonine phosphatase inhibitor activity (GO:0004865);; Cellular Component: cytoplasm (GO:0005737);; Biological Process: regulation of protein dephosphorylation (GO:0035304);; Biological Process: regulation of phosphorylation (GO:0042325);; Biological Process: negative regulation of catalytic activity (GO:0043086);;	K17556|2.6203e-29|hgl:101722824|K17556 protein phosphatase 1 regulatory subunit 14C | (RefSeq) Ppp1r14c; protein phosphatase 1 regulatory inhibitor subunit 14C	--	--	--	PKC-activated protein phosphatase-1 inhibitor	Protein phosphatase 1 regulatory subunit 14B OS=Sus scrofa OX=9823 GN=PPP1R14B PE=2 SV=1	PREDICTED: protein phosphatase 1 regulatory subunit 14C isoform X3 [Tursiops truncatus]
ONT.102.1	--	--	Cellular Component: intracellular organelle (GO:0043229);; Biological Process: single-organism cellular process (GO:0044763);; Biological Process: system development (GO:0048731);;	--	--	--	--	--	--	cullin-7 isoform X1 [Sus scrofa]
ONT.103.1	--	--	Biological Process: cellular protein modification process (GO:0006464);; Molecular Function: methyltransferase activity (GO:0008168);; Biological Process: methylation (GO:0032259);;	K00573|8.70392e-79|cfr:102517637|K00573 protein-L-isoaspartate(D-aspartate) O-methyltransferase [EC:2.1.1.77] | (RefSeq) PCMT1; protein-L-isoaspartate (D-aspartate) O-methyltransferase	--	[O]	Posttranslational modification, protein turnover, chaperones	Protein-L-isoaspartate(D-aspartate) O-methyltransferase (PCMT)	Protein-L-isoaspartate(D-aspartate) O-methyltransferase OS=Sus scrofa OX=9823 GN=PCMT1 PE=1 SV=3	PREDICTED: protein-L-isoaspartate(D-aspartate) O-methyltransferase isoform X3 [Odobenus rosmarus divergens]
ONT.103.3	[O]	Posttranslational modification, protein turnover, chaperones	Molecular Function: protein-L-isoaspartate (D-aspartate) O-methyltransferase activity (GO:0004719);; Cellular Component: cytoplasm (GO:0005737);; Biological Process: protein methylation (GO:0006479);;	K00573|1.106e-167|lve:103071393|K00573 protein-L-isoaspartate(D-aspartate) O-methyltransferase [EC:2.1.1.77] | (RefSeq) PCMT1; protein-L-isoaspartate (D-aspartate) O-methyltransferase	--	[O]	Posttranslational modification, protein turnover, chaperones	Protein-L-isoaspartate(D-aspartate) O-methyltransferase (PCMT);; Methyltransferase domain;; Methyltransferase domain;; Methyltransferase domain;; ubiE/COQ5 methyltransferase family;; tRNA methyltransferase complex GCD14 subunit	Protein-L-isoaspartate(D-aspartate) O-methyltransferase OS=Sus scrofa OX=9823 GN=PCMT1 PE=1 SV=3	protein-L-isoaspartate(D-aspartate) O-methyltransferase isoform X2 [Sus scrofa]
ONT.103.4	[O]	Posttranslational modification, protein turnover, chaperones	Biological Process: metabolic process (GO:0008152);; Molecular Function: transferase activity (GO:0016740);;	K00573|4.26312e-82|bom:102271023|K00573 protein-L-isoaspartate(D-aspartate) O-methyltransferase [EC:2.1.1.77] | (RefSeq) PCMT1; protein-L-isoaspartate (D-aspartate) O-methyltransferase	--	[O]	Posttranslational modification, protein turnover, chaperones	Protein-L-isoaspartate(D-aspartate) O-methyltransferase (PCMT)	Protein-L-isoaspartate(D-aspartate) O-methyltransferase OS=Sus scrofa OX=9823 GN=PCMT1 PE=1 SV=3	PREDICTED: protein-L-isoaspartate(D-aspartate) O-methyltransferase isoform X1 [Manis javanica]
ONT.103.6	[O]	Posttranslational modification, protein turnover, chaperones	Molecular Function: protein-L-isoaspartate (D-aspartate) O-methyltransferase activity (GO:0004719);; Cellular Component: cytoplasm (GO:0005737);; Biological Process: protein methylation (GO:0006479);;	K00573|7.19345e-64|hgl:101723169|K00573 protein-L-isoaspartate(D-aspartate) O-methyltransferase [EC:2.1.1.77] | (RefSeq) Pcmt1; protein-L-isoaspartate (D-aspartate) O-methyltransferase	--	[O]	Posttranslational modification, protein turnover, chaperones	Protein-L-isoaspartate(D-aspartate) O-methyltransferase (PCMT);; Protein-L-isoaspartate(D-aspartate) O-methyltransferase (PCMT)	Protein-L-isoaspartate(D-aspartate) O-methyltransferase OS=Pongo abelii OX=9601 GN=PCMT1 PE=2 SV=3	PREDICTED: protein-L-isoaspartate(D-aspartate) O-methyltransferase-like isoform X2 [Pantholops hodgsonii]
ONT.103.8	--	--	--	K00573|4.33473e-41|acs:100566505|K00573 protein-L-isoaspartate(D-aspartate) O-methyltransferase [EC:2.1.1.77] | (RefSeq) pcmt1; protein-L-isoaspartate (D-aspartate) O-methyltransferase	--	[O]	Posttranslational modification, protein turnover, chaperones	Protein-L-isoaspartate(D-aspartate) O-methyltransferase (PCMT);; Protein-L-isoaspartate(D-aspartate) O-methyltransferase (PCMT)	Protein-L-isoaspartate(D-aspartate) O-methyltransferase OS=Sus scrofa OX=9823 GN=PCMT1 PE=1 SV=3	PREDICTED: protein-L-isoaspartate(D-aspartate) O-methyltransferase [Rousettus aegyptiacus]
ONT.103.10	--	--	Biological Process: cellular protein modification process (GO:0006464);; Molecular Function: methyltransferase activity (GO:0008168);; Biological Process: methylation (GO:0032259);;	K00573|3.25885e-41|pale:102896617|K00573 protein-L-isoaspartate(D-aspartate) O-methyltransferase [EC:2.1.1.77] | (RefSeq) PCMT1; protein-L-isoaspartate (D-aspartate) O-methyltransferase	--	[O]	Posttranslational modification, protein turnover, chaperones	--	Protein-L-isoaspartate(D-aspartate) O-methyltransferase OS=Sus scrofa OX=9823 GN=PCMT1 PE=1 SV=3	protein-L-isoaspartate(D-aspartate) O-methyltransferase isoform X1 [Felis catus]
ONT.103.11	[O]	Posttranslational modification, protein turnover, chaperones	Molecular Function: protein-L-isoaspartate (D-aspartate) O-methyltransferase activity (GO:0004719);; Cellular Component: cytoplasm (GO:0005737);; Biological Process: protein methylation (GO:0006479);;	K00573|9.34432e-105|phd:102319242|K00573 protein-L-isoaspartate(D-aspartate) O-methyltransferase [EC:2.1.1.77] | (RefSeq) PCMT1; protein-L-isoaspartate (D-aspartate) O-methyltransferase	--	[O]	Posttranslational modification, protein turnover, chaperones	Protein-L-isoaspartate(D-aspartate) O-methyltransferase (PCMT);; Protein-L-isoaspartate(D-aspartate) O-methyltransferase (PCMT);; Protein-L-isoaspartate(D-aspartate) O-methyltransferase (PCMT)	Protein-L-isoaspartate(D-aspartate) O-methyltransferase OS=Bos taurus OX=9913 GN=PCMT1 PE=1 SV=2	Protein-L-isoaspartate(D-aspartate) O-methyltransferase [Pteropus alecto]
ONT.103.12	--	--	Biological Process: metabolic process (GO:0008152);; Molecular Function: transferase activity (GO:0016740);;	K00573|1.71076e-70|ecb:100064527|K00573 protein-L-isoaspartate(D-aspartate) O-methyltransferase [EC:2.1.1.77] | (RefSeq) PCMT1; protein-L-isoaspartate (D-aspartate) O-methyltransferase	--	[O]	Posttranslational modification, protein turnover, chaperones	Protein-L-isoaspartate(D-aspartate) O-methyltransferase (PCMT);; Protein-L-isoaspartate(D-aspartate) O-methyltransferase (PCMT)	Protein-L-isoaspartate(D-aspartate) O-methyltransferase OS=Pongo abelii OX=9601 GN=PCMT1 PE=2 SV=3	PREDICTED: protein-L-isoaspartate(D-aspartate) O-methyltransferase isoform X2 [Equus asinus]
ONT.103.13	[O]	Posttranslational modification, protein turnover, chaperones	Molecular Function: protein-L-isoaspartate (D-aspartate) O-methyltransferase activity (GO:0004719);; Cellular Component: cytoplasm (GO:0005737);; Biological Process: protein methylation (GO:0006479);; Cellular Component: integral component of membrane (GO:0016021);;	K00573|1.61742e-124|ecb:100064527|K00573 protein-L-isoaspartate(D-aspartate) O-methyltransferase [EC:2.1.1.77] | (RefSeq) PCMT1; protein-L-isoaspartate (D-aspartate) O-methyltransferase	--	[O]	Posttranslational modification, protein turnover, chaperones	Protein-L-isoaspartate(D-aspartate) O-methyltransferase (PCMT);; Methyltransferase domain;; tRNA methyltransferase complex GCD14 subunit;; Protein-L-isoaspartate(D-aspartate) O-methyltransferase (PCMT)	Protein-L-isoaspartate(D-aspartate) O-methyltransferase OS=Sus scrofa OX=9823 GN=PCMT1 PE=1 SV=3	PREDICTED: protein-L-isoaspartate(D-aspartate) O-methyltransferase isoform X3 [Equus asinus]
ONT.103.15	[O]	Posttranslational modification, protein turnover, chaperones	Biological Process: metabolic process (GO:0008152);; Molecular Function: transferase activity (GO:0016740);;	K00573|3.39319e-88|pss:102453871|K00573 protein-L-isoaspartate(D-aspartate) O-methyltransferase [EC:2.1.1.77] | (RefSeq) PCMT1; protein-L-isoaspartate (D-aspartate) O-methyltransferase	--	[O]	Posttranslational modification, protein turnover, chaperones	Protein-L-isoaspartate(D-aspartate) O-methyltransferase (PCMT);; Protein-L-isoaspartate(D-aspartate) O-methyltransferase (PCMT);; Protein-L-isoaspartate(D-aspartate) O-methyltransferase (PCMT)	Protein-L-isoaspartate(D-aspartate) O-methyltransferase OS=Sus scrofa OX=9823 GN=PCMT1 PE=1 SV=3	PREDICTED: protein-L-isoaspartate(D-aspartate) O-methyltransferase-like isoform X3 [Pantholops hodgsonii]
ONT.103.17	--	--	--	--	--	--	--	--	--	--
ONT.103.20	[O]	Posttranslational modification, protein turnover, chaperones	Molecular Function: protein-L-isoaspartate (D-aspartate) O-methyltransferase activity (GO:0004719);; Cellular Component: cytoplasm (GO:0005737);; Biological Process: protein methylation (GO:0006479);;	K00573|3.9869e-118|acs:100566505|K00573 protein-L-isoaspartate(D-aspartate) O-methyltransferase [EC:2.1.1.77] | (RefSeq) pcmt1; protein-L-isoaspartate (D-aspartate) O-methyltransferase	--	[O]	Posttranslational modification, protein turnover, chaperones	Protein-L-isoaspartate(D-aspartate) O-methyltransferase (PCMT);; Methyltransferase domain;; ubiE/COQ5 methyltransferase family;; tRNA methyltransferase complex GCD14 subunit;; Methyltransferase domain;; Protein-L-isoaspartate(D-aspartate) O-methyltransferase (PCMT)	Protein-L-isoaspartate(D-aspartate) O-methyltransferase OS=Sus scrofa OX=9823 GN=PCMT1 PE=1 SV=3	protein-L-isoaspartate(D-aspartate) O-methyltransferase isoform X3 [Delphinapterus leucas]
ONT.103.21	[O]	Posttranslational modification, protein turnover, chaperones	Molecular Function: protein-L-isoaspartate (D-aspartate) O-methyltransferase activity (GO:0004719);; Cellular Component: cytoplasm (GO:0005737);; Biological Process: protein methylation (GO:0006479);;	K00573|6.12233e-74|aml:100469597|K00573 protein-L-isoaspartate(D-aspartate) O-methyltransferase [EC:2.1.1.77] | (RefSeq) PCMT1; protein-L-isoaspartate (D-aspartate) O-methyltransferase	--	[O]	Posttranslational modification, protein turnover, chaperones	Protein-L-isoaspartate(D-aspartate) O-methyltransferase (PCMT)	Protein-L-isoaspartate(D-aspartate) O-methyltransferase OS=Sus scrofa OX=9823 GN=PCMT1 PE=1 SV=3	protein-L-isoaspartate(D-aspartate) O-methyltransferase isoform X2 [Physeter catodon]
ONT.103.25	--	--	Molecular Function: protein-L-isoaspartate (D-aspartate) O-methyltransferase activity (GO:0004719);; Cellular Component: cytoplasm (GO:0005737);; Biological Process: protein methylation (GO:0006479);;	K00573|3.34171e-29|pale:102896617|K00573 protein-L-isoaspartate(D-aspartate) O-methyltransferase [EC:2.1.1.77] | (RefSeq) PCMT1; protein-L-isoaspartate (D-aspartate) O-methyltransferase	--	[O]	Posttranslational modification, protein turnover, chaperones	--	Protein-L-isoaspartate(D-aspartate) O-methyltransferase OS=Pongo abelii OX=9601 GN=PCMT1 PE=2 SV=3	PREDICTED: protein-L-isoaspartate(D-aspartate) O-methyltransferase [Leptonychotes weddellii]
ONT.103.26	--	--	Molecular Function: protein-L-isoaspartate (D-aspartate) O-methyltransferase activity (GO:0004719);; Cellular Component: cytoplasm (GO:0005737);; Biological Process: protein methylation (GO:0006479);; Cellular Component: integral component of membrane (GO:0016021);;	K00573|5.90136e-30|ecb:100064527|K00573 protein-L-isoaspartate(D-aspartate) O-methyltransferase [EC:2.1.1.77] | (RefSeq) PCMT1; protein-L-isoaspartate (D-aspartate) O-methyltransferase	--	[O]	Posttranslational modification, protein turnover, chaperones	--	Protein-L-isoaspartate(D-aspartate) O-methyltransferase OS=Sus scrofa OX=9823 GN=PCMT1 PE=1 SV=3	PREDICTED: protein-L-isoaspartate(D-aspartate) O-methyltransferase isoform X1 [Equus asinus]
ONT.104.1	--	--	Cellular Component: protein complex (GO:0043234);; Cellular Component: intracellular organelle part (GO:0044446);;	K14305|5.20031e-86|ocu:100340965|K14305 nuclear pore complex protein Nup43 | (RefSeq) NUP43; nucleoporin 43	RNA transport (ko03013)	[Y]	Nuclear structure	--	--	PREDICTED: nucleoporin Nup43 isoform X1 [Oryctolagus cuniculus]
ONT.104.3	--	--	Cellular Component: nuclear pore outer ring (GO:0031080);;	K14305|2.99648e-157|ssc:100154567|K14305 nuclear pore complex protein Nup43 | (RefSeq) NUP43; nucleoporin 43	RNA transport (ko03013)	[Y]	Nuclear structure	--	--	nucleoporin Nup43 isoform X2 [Sus scrofa]
ONT.105.1	--	--	--	--	--	--	--	--	--	--
ONT.106.1	[O]	Posttranslational modification, protein turnover, chaperones	Molecular Function: binding (GO:0005488);; Biological Process: organelle organization (GO:0006996);; Biological Process: microtubule-based process (GO:0007017);; Cellular Component: microtubule cytoskeleton (GO:0015630);; Molecular Function: hydrolase activity (GO:0016787);; Cellular Component: cytoskeletal part (GO:0044430);;	K07767|5.07498e-122|oas:101122604|K07767 katanin p60 ATPase-containing subunit A1 [EC:3.6.4.3] | (RefSeq) KATNA1; katanin catalytic subunit A1	--	[O]	Posttranslational modification, protein turnover, chaperones	--	Katanin p60 ATPase-containing subunit A1 OS=Macaca fascicularis OX=9541 GN=KATNA1 PE=2 SV=1	PREDICTED: katanin p60 ATPase-containing subunit A1 [Rhinolophus sinicus]
ONT.106.2	[MDT]	Cell wall/membrane/envelope biogenesis;; Cell cycle control, cell division, chromosome partitioning;; Signal transduction mechanisms	Molecular Function: binding (GO:0005488);; Biological Process: organelle organization (GO:0006996);; Biological Process: microtubule-based process (GO:0007017);; Cellular Component: microtubule cytoskeleton (GO:0015630);; Molecular Function: hydrolase activity (GO:0016787);; Cellular Component: cytoskeletal part (GO:0044430);;	K07767|3.20715e-147|ssc:100518101|K07767 katanin p60 ATPase-containing subunit A1 [EC:3.6.4.3] | (RefSeq) KATNA1; katanin catalytic subunit A1	--	[O]	Posttranslational modification, protein turnover, chaperones	--	Katanin p60 ATPase-containing subunit A1 OS=Macaca fascicularis OX=9541 GN=KATNA1 PE=2 SV=1	katanin p60 ATPase-containing subunit A1 isoform X1 [Sus scrofa]
ONT.106.3	--	--	Cellular Component: spindle pole (GO:0000922);; Molecular Function: ATP binding (GO:0005524);; Cellular Component: nucleus (GO:0005634);; Cellular Component: cytoplasm (GO:0005737);; Cellular Component: centrosome (GO:0005813);; Cellular Component: microtubule (GO:0005874);; Biological Process: mitotic cell cycle (GO:0007067);; Molecular Function: microtubule binding (GO:0008017);; Molecular Func…	K07767|1.6202e-65|cjc:100385433|K07767 katanin p60 ATPase-containing subunit A1 [EC:3.6.4.3] | (RefSeq) KATNA1; katanin catalytic subunit A1	--	[O]	Posttranslational modification, protein turnover, chaperones	--	Katanin p60 ATPase-containing subunit A1 OS=Macaca fascicularis OX=9541 GN=KATNA1 PE=2 SV=1	PREDICTED: katanin p60 ATPase-containing subunit A1 isoform X1 [Ochotona princeps]
ONT.106.5	[O]	Posttranslational modification, protein turnover, chaperones	Molecular Function: nucleotide binding (GO:0000166);; Molecular Function: protein binding (GO:0005515);; Cellular Component: nucleus (GO:0005634);; Cellular Component: microtubule organizing center (GO:0005815);; Cellular Component: spindle (GO:0005819);; Biological Process: cell cycle (GO:0007049);; Molecular Function: microtubule-severing ATPase activity (GO:0008568);; Molecular Function: kinas…	K07767|0|ssc:100518101|K07767 katanin p60 ATPase-containing subunit A1 [EC:3.6.4.3] | (RefSeq) KATNA1; katanin catalytic subunit A1	--	[O]	Posttranslational modification, protein turnover, chaperones	ATPase family associated with various cellular activities (AAA);; AAA domain (Cdc48 subfamily);; Holliday junction DNA helicase ruvB N-terminus;; AAA domain (dynein-related subfamily);; Magnesium chelatase, subunit ChlI	Katanin p60 ATPase-containing subunit A1 OS=Macaca fascicularis OX=9541 GN=KATNA1 PE=2 SV=1	katanin p60 ATPase-containing subunit A1 isoform X1 [Sus scrofa]
ONT.107.1	--	--	Cellular Component: spindle pole (GO:0000922);; Molecular Function: protein serine/threonine kinase activity (GO:0004674);; Molecular Function: ATP binding (GO:0005524);; Cellular Component: nucleus (GO:0005634);; Cellular Component: cytoplasm (GO:0005737);; Cellular Component: centrosome (GO:0005813);; Cellular Component: microtubule (GO:0005874);; Biological Process: protein phosphorylation (GO…	K07767|6.82125e-24|ssc:100518101|K07767 katanin p60 ATPase-containing subunit A1 [EC:3.6.4.3] | (RefSeq) KATNA1; katanin catalytic subunit A1	--	[O]	Posttranslational modification, protein turnover, chaperones	--	Katanin p60 ATPase-containing subunit A1 OS=Macaca fascicularis OX=9541 GN=KATNA1 PE=2 SV=1	Katanin p60 ATPase-containing subunit A1 [Bos mutus]
ONT.108.3	--	--	--	--	--	--	--	--	Glycoprotein integral membrane protein 1 OS=Pongo abelii OX=9601 GN=GINM1 PE=2 SV=1	PREDICTED: glycoprotein integral membrane protein 1 isoform X2 [Mustela putorius furo]
ONT.108.4	--	--	Cellular Component: membrane (GO:0016020);;	--	--	--	--	--	Glycoprotein integral membrane protein 1 OS=Pongo abelii OX=9601 GN=GINM1 PE=2 SV=1	PREDICTED: glycoprotein integral membrane protein 1 isoform X2 [Pteropus alecto]
ONT.108.5	--	--	Cellular Component: integral component of membrane (GO:0016021);; Cellular Component: extracellular exosome (GO:0070062);;	--	--	--	--	--	Glycoprotein integral membrane protein 1 OS=Pongo abelii OX=9601 GN=GINM1 PE=2 SV=1	glycoprotein integral membrane protein 1 [Sus scrofa]
ONT.108.6	--	--	--	--	--	--	--	--	Glycoprotein integral membrane protein 1 OS=Pongo abelii OX=9601 GN=GINM1 PE=2 SV=1	glycoprotein integral membrane protein 1 [Sus scrofa]
ONT.108.11	--	--	Cellular Component: membrane (GO:0016020);;	--	--	--	--	--	Glycoprotein integral membrane protein 1 OS=Pongo abelii OX=9601 GN=GINM1 PE=2 SV=1	glycoprotein integral membrane protein 1 [Sus scrofa]
ONT.109.1	--	--	Molecular Function: binding (GO:0005488);; Biological Process: cellular process (GO:0009987);;	K04404|5.91921e-64|cfr:102516031|K04404 TAK1-binding protein 2 | (RefSeq) TAB2; TGF-beta activated kinase 1/MAP3K7 binding protein 2	MAPK signaling pathway (ko04010);; NF-kappa B signaling pathway (ko04064);; Osteoclast differentiation (ko04380);; Toll-like receptor signaling pathway (ko04620);; NOD-like receptor signaling pathway (ko04621);; TNF signaling pathway (ko04668);; Leishmaniasis (ko05140);; Toxoplasmosis (ko05145);; Measles (ko05162);; Herpes simplex infection (ko05168);; Epstein-Barr virus infection (ko05169)	--	--	--	--	TGF-beta-activated kinase 1 and MAP3K7-binding protein 2 isoform X2 [Sus scrofa]
ONT.109.2	--	--	--	--	--	--	--	--	--	--
ONT.110.1	--	--	--	--	--	--	--	--	--	--
ONT.111.1	--	--	--	--	--	--	--	--	--	--
ONT.111.2	--	--	--	--	--	--	--	--	--	--
ONT.111.3	--	--	--	--	--	--	--	--	--	--
ONT.111.4	--	--	--	--	--	--	--	--	--	--
ONT.111.7	--	--	--	--	--	--	--	--	--	--
ONT.112.2	--	--	--	--	--	--	--	--	--	--
ONT.113.1	--	--	--	--	--	--	--	--	--	--
ONT.114.2	--	--	Molecular Function: binding (GO:0005488);; Biological Process: cellular process (GO:0009987);; Cellular Component: cytoplasmic vesicle (GO:0031410);; Biological Process: single-organism process (GO:0044699);;	K07918|2.86323e-29|chx:102185468|K07918 Ras-related protein Rab-32 | (RefSeq) RAB32; RAB32, member RAS oncogene family	--	[T]	Signal transduction mechanisms	--	Ras-related protein Rab-32 OS=Sus scrofa OX=9823 GN=RAB32 PE=2 SV=1	PREDICTED: ras-related protein Rab-32 [Pteropus alecto]
ONT.115.1	--	--	--	--	--	--	--	--	--	--
ONT.116.1	--	--	--	--	--	--	--	--	--	--
ONT.117.1	--	--	--	--	--	--	--	--	--	--
ONT.117.3	--	--	--	--	--	--	--	--	--	--
ONT.119.2	--	--	Cellular Component: U12-type spliceosomal complex (GO:0005689);;	K12832|6.3464e-58|umr:103666941|K12832 splicing factor 3B subunit 5 | (RefSeq) SF3B5; splicing factor 3b subunit 5	Spliceosome (ko03040)	[S]	Function unknown	Splicing factor 3B subunit 10 (SF3b10)	Splicing factor 3B subunit 5 OS=Bos taurus OX=9913 GN=SF3B5 PE=3 SV=1	PREDICTED: splicing factor 3B subunit 5 [Tupaia chinensis]
ONT.120.1	--	--	--	--	--	--	--	--	--	--
ONT.122.1	--	--	--	K14798|2.52902e-103|phd:102327545|K14798 protein LTV1 | (RefSeq) LTV1; LTV1 ribosome biogenesis factor	--	[S]	Function unknown	Low temperature viability protein;; Low temperature viability protein;; Low temperature viability protein	Protein LTV1 homolog OS=Bos taurus OX=9913 GN=LTV1 PE=2 SV=1	protein LTV1 homolog [Sus scrofa]
ONT.122.2	--	--	--	K14798|8.8258e-69|cjc:100393756|K14798 protein LTV1 | (RefSeq) LTV1; LTV1 ribosome biogenesis factor	--	[S]	Function unknown	Low temperature viability protein;; Low temperature viability protein	Protein LTV1 homolog OS=Bos taurus OX=9913 GN=LTV1 PE=2 SV=1	PREDICTED: protein LTV1 homolog [Hipposideros armiger]
ONT.122.4	--	--	--	K14798|7.1301e-114|cfr:102508390|K14798 protein LTV1 | (RefSeq) LTV1; LTV1 ribosome biogenesis factor	--	[S]	Function unknown	Low temperature viability protein;; Low temperature viability protein	Protein LTV1 homolog OS=Bos taurus OX=9913 GN=LTV1 PE=2 SV=1	protein LTV1 homolog [Sus scrofa]
ONT.123.1	--	--	--	--	--	--	--	--	--	--
ONT.124.1	--	--	--	--	--	--	--	--	--	--
ONT.125.1	--	--	--	--	--	--	--	--	--	--
ONT.126.1	--	--	--	--	--	[R]	General function prediction only	RPEL repeat	Phosphatase and actin regulator 4 OS=Pongo abelii OX=9601 GN=PHACTR4 PE=2 SV=2	phosphatase and actin regulator 2 isoform X5 [Sus scrofa]
ONT.127.1	[G]	Carbohydrate transport and metabolism	--	K01206|5.20639e-71|ssc:100154940|K01206 alpha-L-fucosidase [EC:3.2.1.51] | (RefSeq) FUCA2; fucosidase, alpha-L- 2, plasma	Other glycan degradation (ko00511)	[G]	Carbohydrate transport and metabolism	Alpha-L-fucosidase	Plasma alpha-L-fucosidase OS=Pongo abelii OX=9601 GN=FUCA2 PE=2 SV=1	plasma alpha-L-fucosidase isoform X2 [Sus scrofa]
ONT.128.1	--	--	Cellular Component: intracellular membrane-bounded organelle (GO:0043231);;	K13336|2.69342e-64|ssc:100153726|K13336 peroxin-3 | (RefSeq) PEX3; peroxisomal biogenesis factor 3	Peroxisome (ko04146)	[MU]	Cell wall/membrane/envelope biogenesis;; Intracellular trafficking, secretion, and vesicular transport	--	Peroxisomal biogenesis factor 3 OS=Macaca fascicularis OX=9541 GN=PEX3 PE=2 SV=1	peroxisomal biogenesis factor 3 [Sus scrofa]
ONT.128.2	--	--	Cellular Component: peroxisome (GO:0005777);; Biological Process: response to stress (GO:0006950);; Biological Process: organelle organization (GO:0006996);; Cellular Component: membrane (GO:0016020);; Cellular Component: intracellular organelle part (GO:0044446);; Biological Process: single-organism transport (GO:0044765);; Biological Process: transmembrane transport (GO:0055085);; Biological Pr…	K13336|4.03953e-119|ssc:100153726|K13336 peroxin-3 | (RefSeq) PEX3; peroxisomal biogenesis factor 3	Peroxisome (ko04146)	[MU]	Cell wall/membrane/envelope biogenesis;; Intracellular trafficking, secretion, and vesicular transport	--	Peroxisomal biogenesis factor 3 OS=Macaca fascicularis OX=9541 GN=PEX3 PE=2 SV=1	peroxisomal biogenesis factor 3 [Sus scrofa]
ONT.129.1	[J]	Translation, ribosomal structure and biogenesis	Biological Process: tRNA wobble adenosine to inosine editing (GO:0002100);; Molecular Function: zinc ion binding (GO:0008270);; Molecular Function: tRNA-specific adenosine-34 deaminase activity (GO:0052717);; Cellular Component: tRNA-specific adenosine-34 deaminase complex (GO:0052718);;	K15441|4.39169e-94|chx:102178829|K15441 tRNA-specific adenosine deaminase 2 [EC:3.5.4.-] | (RefSeq) ADAT2; adenosine deaminase, tRNA specific 2	--	[F]	Nucleotide transport and metabolism	Cytidine and deoxycytidylate deaminase zinc-binding region;; MafB19-like deaminase	tRNA-specific adenosine deaminase 2 OS=Bos taurus OX=9913 GN=DEADC1 PE=2 SV=1	tRNA-specific adenosine deaminase 2 [Sus scrofa]
ONT.129.2	[J]	Translation, ribosomal structure and biogenesis	Biological Process: tRNA wobble adenosine to inosine editing (GO:0002100);; Molecular Function: zinc ion binding (GO:0008270);; Molecular Function: tRNA-specific adenosine-34 deaminase activity (GO:0052717);; Cellular Component: tRNA-specific adenosine-34 deaminase complex (GO:0052718);;	K15441|1.33744e-58|shr:100926313|K15441 tRNA-specific adenosine deaminase 2 [EC:3.5.4.-] | (RefSeq) ADAT2; adenosine deaminase, tRNA specific 2	--	[F]	Nucleotide transport and metabolism	--	tRNA-specific adenosine deaminase 2 OS=Bos taurus OX=9913 GN=DEADC1 PE=2 SV=1	tRNA-specific adenosine deaminase 2 isoform X1 [Sarcophilus harrisii]
ONT.129.3	[J]	Translation, ribosomal structure and biogenesis	Molecular Function: hydrolase activity (GO:0016787);;	K15441|4.26096e-55|ssc:100154785|K15441 tRNA-specific adenosine deaminase 2 [EC:3.5.4.-] | (RefSeq) ADAT2; adenosine deaminase, tRNA specific 2	--	[F]	Nucleotide transport and metabolism	--	tRNA-specific adenosine deaminase 2 OS=Bos taurus OX=9913 GN=DEADC1 PE=2 SV=1	tRNA-specific adenosine deaminase 2 [Sus scrofa]
ONT.130.1	--	--	--	--	--	[W]	Extracellular structures	--	--	androgen-induced gene 1 protein [Bos taurus]
ONT.130.7	--	--	--	--	--	[W]	Extracellular structures	FAR-17a/AIG1-like protein;; FAR-17a/AIG1-like protein	--	androgen-induced gene 1 protein isoform X4 [Sus scrofa]
ONT.130.9	--	--	Cellular Component: integral component of membrane (GO:0016021);;	--	--	[W]	Extracellular structures	FAR-17a/AIG1-like protein	--	TPA: androgen-induced 1-like, partial [Bos taurus]
ONT.131.1	--	--	--	--	--	--	--	--	--	--
ONT.132.1	--	--	Cellular Component: cytoplasm (GO:0005737);; Biological Process: anatomical structure morphogenesis (GO:0009653);; Biological Process: tissue development (GO:0009888);; Biological Process: cell differentiation (GO:0030154);; Cellular Component: intracellular membrane-bounded organelle (GO:0043231);; Cellular Component: intracellular organelle part (GO:0044446);; Biological Process: animal organ d…	--	--	--	--	--	--	cullin-7 isoform X1 [Sus scrofa]
ONT.133.1	--	--	--	--	--	--	--	--	--	--
ONT.134.1	--	--	--	--	--	--	--	--	--	--
ONT.135.1	--	--	Cellular Component: cytosol (GO:0005829);; Molecular Function: protein C-terminus binding (GO:0008022);; Cellular Component: endosome membrane (GO:0010008);; Biological Process: protein transport (GO:0015031);; Biological Process: viral budding (GO:0046755);; Cellular Component: extracellular exosome (GO:0070062);; Biological Process: multivesicular body sorting pathway (GO:0071985);;	K12199|1.63494e-97|ssc:100155445|K12199 vacuolar protein sorting-associated protein VTA1 | (RefSeq) vacuolar protein sorting-associated protein VTA1 homolog	Endocytosis (ko04144)	[S]	Function unknown	Vta1 like	Vacuolar protein sorting-associated protein VTA1 homolog OS=Bos taurus OX=9913 GN=VTA1 PE=2 SV=1	vacuolar protein sorting-associated protein VTA1 homolog isoform X1 [Sus scrofa]
ONT.135.3	--	--	Biological Process: transport (GO:0006810);; Cellular Component: vesicle (GO:0031982);; Cellular Component: cytoplasmic part (GO:0044444);;	K12199|2.5292e-65|phd:102330894|K12199 vacuolar protein sorting-associated protein VTA1 | (RefSeq) VTA1; vesicle trafficking 1	Endocytosis (ko04144)	[S]	Function unknown	--	Vacuolar protein sorting-associated protein VTA1 homolog OS=Bos taurus OX=9913 GN=VTA1 PE=2 SV=1	PREDICTED: vacuolar protein sorting-associated protein VTA1 homolog isoform X3 [Ovis aries]
ONT.135.4	--	--	Cellular Component: cytosol (GO:0005829);; Molecular Function: protein C-terminus binding (GO:0008022);; Cellular Component: endosome membrane (GO:0010008);; Biological Process: protein transport (GO:0015031);; Biological Process: viral budding (GO:0046755);; Cellular Component: extracellular exosome (GO:0070062);; Biological Process: multivesicular body sorting pathway (GO:0071985);;	K12199|2.40827e-138|bom:102273531|K12199 vacuolar protein sorting-associated protein VTA1 | (RefSeq) VTA1; vesicle trafficking 1	Endocytosis (ko04144)	[S]	Function unknown	Vta1 like	Vacuolar protein sorting-associated protein VTA1 homolog OS=Bos taurus OX=9913 GN=VTA1 PE=2 SV=1	PREDICTED: vacuolar protein sorting-associated protein VTA1 homolog isoform X2 [Bos taurus]
ONT.135.7	--	--	Biological Process: transport (GO:0006810);; Cellular Component: vesicle (GO:0031982);; Cellular Component: cytoplasmic part (GO:0044444);;	K12199|5.60986e-74|bta:506430|K12199 vacuolar protein sorting-associated protein VTA1 | (RefSeq) VTA1; vesicle trafficking 1	Endocytosis (ko04144)	[S]	Function unknown	Vta1 like	Vacuolar protein sorting-associated protein VTA1 homolog OS=Bos taurus OX=9913 GN=VTA1 PE=2 SV=1	PREDICTED: vacuolar protein sorting-associated protein VTA1 homolog isoform X2 [Chrysochloris asiatica]
ONT.136.1	--	--	Cellular Component: nuclear chromatin (GO:0000790);; Molecular Function: RNA polymerase II activating transcription factor binding (GO:0001102);; Molecular Function: RNA polymerase II transcription coactivator activity (GO:0001105);; Biological Process: vasculogenesis (GO:0001570);; Biological Process: response to hypoxia (GO:0001666);; Biological Process: trophectodermal cell differentiation (GO…	--	--	--	--	CITED	Cbp/p300-interacting transactivator 2 OS=Bos taurus OX=9913 GN=CITED2 PE=2 SV=1	PREDICTED: cbp/p300-interacting transactivator 2 [Tupaia chinensis]
ONT.137.1	--	--	--	--	--	--	--	--	--	beta-taxilin isoform X2 [Sus scrofa]
ONT.137.2	--	--	--	--	--	[Z]	Cytoskeleton	--	--	beta-taxilin isoform X2 [Sus scrofa]
ONT.137.3	--	--	--	--	--	--	--	--	--	--
ONT.137.4	--	--	--	--	--	[Z]	Cytoskeleton	Myosin-like coiled-coil protein;; Myosin-like coiled-coil protein	--	beta-taxilin isoform X2 [Sus scrofa]
ONT.137.6	--	--	Cellular Component: cytoplasm (GO:0005737);; Molecular Function: syntaxin binding (GO:0019905);;	--	--	[Z]	Cytoskeleton	--	--	beta-taxilin isoform X1 [Sus scrofa]
ONT.137.7	--	--	--	--	--	[Z]	Cytoskeleton	--	--	beta-taxilin [Physeter catodon]
ONT.137.8	--	--	Cellular Component: cytoplasm (GO:0005737);; Molecular Function: syntaxin binding (GO:0019905);;	--	--	--	--	--	--	beta-taxilin isoform X1 [Sus scrofa]
ONT.137.9	--	--	--	--	--	[Z]	Cytoskeleton	Myosin-like coiled-coil protein	--	PREDICTED: LOW QUALITY PROTEIN: beta-taxilin [Lipotes vexillifer]
ONT.137.10	--	--	--	--	--	[Z]	Cytoskeleton	Myosin-like coiled-coil protein	--	beta-taxilin isoform X1 [Sus scrofa]
ONT.137.12	--	--	Cellular Component: cytoplasm (GO:0005737);; Molecular Function: syntaxin binding (GO:0019905);;	--	--	[Z]	Cytoskeleton	--	--	beta-taxilin isoform X1 [Sus scrofa]
ONT.137.13	--	--	--	--	--	--	--	--	--	--
ONT.137.14	--	--	--	--	--	[Z]	Cytoskeleton	--	--	beta-taxilin isoform X1 [Sus scrofa]
ONT.137.15	--	--	Cellular Component: cytoplasm (GO:0005737);; Cellular Component: integral component of membrane (GO:0016021);; Molecular Function: syntaxin binding (GO:0019905);;	--	--	[Z]	Cytoskeleton	Myosin-like coiled-coil protein	--	PREDICTED: beta-taxilin [Miniopterus natalensis]
ONT.137.16	--	--	Cellular Component: cytoplasm (GO:0005737);; Molecular Function: syntaxin binding (GO:0019905);;	--	--	[Z]	Cytoskeleton	Myosin-like coiled-coil protein	--	beta-taxilin isoform X1 [Sus scrofa]
ONT.137.17	--	--	--	--	--	[Z]	Cytoskeleton	Myosin-like coiled-coil protein;; Myosin-like coiled-coil protein;; Myosin-like coiled-coil protein	--	beta-taxilin isoform X1 [Sus scrofa]
ONT.137.19	--	--	--	--	--	[Z]	Cytoskeleton	Myosin-like coiled-coil protein	--	beta-taxilin isoform X1 [Sus scrofa]
ONT.137.21	--	--	--	--	--	--	--	--	--	beta-taxilin isoform X2 [Sus scrofa]
ONT.137.22	--	--	Cellular Component: cytoplasm (GO:0005737);; Molecular Function: syntaxin binding (GO:0019905);;	--	--	--	--	--	--	beta-taxilin isoform X2 [Sus scrofa]
ONT.137.23	--	--	--	--	--	[Z]	Cytoskeleton	Myosin-like coiled-coil protein	--	beta-taxilin isoform X1 [Sus scrofa]
ONT.137.25	--	--	--	--	--	[Z]	Cytoskeleton	--	--	beta-taxilin isoform X2 [Sus scrofa]
ONT.137.26	--	--	--	--	--	--	--	--	--	beta-taxilin isoform X1 [Sus scrofa]
ONT.137.28	--	--	--	--	--	--	--	--	--	--
ONT.137.29	--	--	--	--	--	[Z]	Cytoskeleton	Myosin-like coiled-coil protein	--	PREDICTED: beta-taxilin [Leptonychotes weddellii]
ONT.138.3	--	--	--	--	--	[Z]	Cytoskeleton	--	--	beta-taxilin [Felis catus]
ONT.139.1	--	--	--	--	--	--	--	--	--	--
ONT.140.2	--	--	--	--	--	[S]	Function unknown	Costars	Costars family protein ABRACL OS=Bos taurus OX=9913 GN=ABRACL PE=3 SV=1	PREDICTED: costars family protein ABRACL [Ursus maritimus]
ONT.142.1	--	--	--	--	--	--	--	Domain of unknown function (DUF4061)	--	PREDICTED: coiled-coil domain-containing protein 28A isoform X1 [Vicugna pacos]
ONT.142.2	--	--	--	--	--	--	--	--	--	PREDICTED: coiled-coil domain-containing protein 28A isoform X1 [Vicugna pacos]
ONT.142.3	--	--	--	--	--	--	--	Domain of unknown function (DUF4061)	--	PREDICTED: coiled-coil domain-containing protein 28A isoform X1 [Vicugna pacos]
ONT.142.4	--	--	--	--	--	--	--	Domain of unknown function (DUF4061)	--	PREDICTED: coiled-coil domain-containing protein 28A isoform X1 [Vicugna pacos]
ONT.142.6	--	--	--	--	--	--	--	Domain of unknown function (DUF4061)	--	PREDICTED: coiled-coil domain-containing protein 28A, partial [Acinonyx jubatus]
ONT.142.10	--	--	--	--	--	--	--	--	--	PREDICTED: coiled-coil domain-containing protein 28A [Tursiops truncatus]
ONT.142.14	--	--	--	--	--	--	--	--	--	PREDICTED: LOW QUALITY PROTEIN: coiled-coil domain-containing protein 28A [Camelus bactrianus]
ONT.142.15	--	--	--	--	--	--	--	--	--	--
ONT.142.16	--	--	--	--	--	--	--	--	--	coiled-coil domain-containing protein 28A [Sus scrofa]
ONT.142.17	--	--	--	--	--	--	--	--	--	coiled-coil domain-containing protein 28A [Sus scrofa]
ONT.142.18	--	--	--	--	--	--	--	--	--	PREDICTED: coiled-coil domain-containing protein 28A isoform X4 [Vicugna pacos]
ONT.143.1	--	--	--	--	--	--	--	SOUL heme-binding protein	--	heme-binding protein 2 isoform X1 [Sus scrofa]
ONT.143.2	--	--	Cellular Component: mitochondrion (GO:0005739);; Biological Process: negative regulation of mitochondrial membrane potential (GO:0010917);; Biological Process: positive regulation of necrotic cell death (GO:0010940);; Biological Process: positive regulation of mitochondrial membrane permeability (GO:0035794);; Cellular Component: extracellular exosome (GO:0070062);;	--	--	--	--	SOUL heme-binding protein	Heme-binding protein 1 OS=Sus scrofa OX=9823 GN=HEBP1 PE=2 SV=1	PREDICTED: heme-binding protein 2 [Camelus dromedarius]
ONT.143.3	--	--	Biological Process: biological regulation (GO:0065007);;	--	--	--	--	SOUL heme-binding protein	--	heme-binding protein 2 isoform X1 [Sus scrofa]
ONT.144.1	--	--	Biological Process: desmosome organization (GO:0002934);; Cellular Component: mitochondrion (GO:0005739);; Cellular Component: Golgi apparatus (GO:0005794);; Cellular Component: integral component of plasma membrane (GO:0005887);; Biological Process: Notch signaling pathway (GO:0007219);; Cellular Component: cell junction (GO:0030054);; Biological Process: heterotypic cell-cell adhesion (GO:00341…	K10136|1.89576e-60|aml:100474528|K10136 TP53 apoptosis effector | (RefSeq) PERP; PERP, TP53 apoptosis effector	p53 signaling pathway (ko04115)	[R]	General function prediction only	--	--	PREDICTED: p53 apoptosis effector related to PMP-22 [Ailuropoda melanoleuca]
ONT.144.3	--	--	Biological Process: desmosome organization (GO:0002934);; Cellular Component: mitochondrion (GO:0005739);; Cellular Component: Golgi apparatus (GO:0005794);; Cellular Component: integral component of plasma membrane (GO:0005887);; Biological Process: Notch signaling pathway (GO:0007219);; Cellular Component: cell junction (GO:0030054);; Biological Process: heterotypic cell-cell adhesion (GO:00341…	--	--	[R]	General function prediction only	--	--	p53 apoptosis effector related to PMP-22 [Sus scrofa]
ONT.145.1	--	--	--	--	--	--	--	--	--	--
ONT.146.1	--	--	Cellular Component: membrane (GO:0016020);; Molecular Function: cytokine binding (GO:0019955);;	K05132|4.76077e-111|ssc:100152238|K05132 interferon gamma receptor 1 | (RefSeq) IFNGR1; interferon gamma receptor 1	Cytokine-cytokine receptor interaction (ko04060);; HIF-1 signaling pathway (ko04066);; Osteoclast differentiation (ko04380);; Jak-STAT signaling pathway (ko04630);; Natural killer cell mediated cytotoxicity (ko04650);; Salmonella infection (ko05132);; Leishmaniasis (ko05140);; Chagas disease (American trypanosomiasis) (ko05142);; Toxoplasmosis (ko05145);; Tuberculosis (ko05152);; Measles (ko05162…	--	--	Interferon gamma receptor (IFNGR1)	--	interferon gamma receptor 1 isoform X1 [Sus scrofa]
ONT.146.2	--	--	Molecular Function: cytokine receptor activity (GO:0004896);; Cellular Component: plasma membrane (GO:0005886);; Cellular Component: integral component of membrane (GO:0016021);; Biological Process: cytokine-mediated signaling pathway (GO:0019221);; Molecular Function: interleukin-20 binding (GO:0042015);;	K05132|1.16839e-115|ssc:100152238|K05132 interferon gamma receptor 1 | (RefSeq) IFNGR1; interferon gamma receptor 1	Cytokine-cytokine receptor interaction (ko04060);; HIF-1 signaling pathway (ko04066);; Osteoclast differentiation (ko04380);; Jak-STAT signaling pathway (ko04630);; Natural killer cell mediated cytotoxicity (ko04650);; Salmonella infection (ko05132);; Leishmaniasis (ko05140);; Chagas disease (American trypanosomiasis) (ko05142);; Toxoplasmosis (ko05145);; Tuberculosis (ko05152);; Measles (ko05162…	--	--	Interferon gamma receptor (IFNGR1);; Interferon-alpha/beta receptor, fibronectin type III	--	interferon gamma receptor 1 isoform X1 [Sus scrofa]
ONT.146.3	--	--	Cellular Component: membrane (GO:0016020);;	K05132|4.21439e-128|ssc:100152238|K05132 interferon gamma receptor 1 | (RefSeq) IFNGR1; interferon gamma receptor 1	Cytokine-cytokine receptor interaction (ko04060);; HIF-1 signaling pathway (ko04066);; Osteoclast differentiation (ko04380);; Jak-STAT signaling pathway (ko04630);; Natural killer cell mediated cytotoxicity (ko04650);; Salmonella infection (ko05132);; Leishmaniasis (ko05140);; Chagas disease (American trypanosomiasis) (ko05142);; Toxoplasmosis (ko05145);; Tuberculosis (ko05152);; Measles (ko05162…	--	--	Interferon gamma receptor (IFNGR1)	--	interferon gamma receptor 1 precursor [Sus scrofa]
ONT.146.4	--	--	Molecular Function: cytokine receptor activity (GO:0004896);; Cellular Component: plasma membrane (GO:0005886);; Cellular Component: integral component of membrane (GO:0016021);; Biological Process: cytokine-mediated signaling pathway (GO:0019221);; Molecular Function: interleukin-20 binding (GO:0042015);;	K05132|0|ssc:100152238|K05132 interferon gamma receptor 1 | (RefSeq) IFNGR1; interferon gamma receptor 1	Cytokine-cytokine receptor interaction (ko04060);; HIF-1 signaling pathway (ko04066);; Osteoclast differentiation (ko04380);; Jak-STAT signaling pathway (ko04630);; Natural killer cell mediated cytotoxicity (ko04650);; Salmonella infection (ko05132);; Leishmaniasis (ko05140);; Chagas disease (American trypanosomiasis) (ko05142);; Toxoplasmosis (ko05145);; Tuberculosis (ko05152);; Measles (ko05162…	--	--	--	--	interferon gamma receptor 1 precursor [Sus scrofa]
ONT.147.1	--	--	Molecular Function: cytokine receptor activity (GO:0004896);; Cellular Component: plasma membrane (GO:0005886);; Cellular Component: integral component of membrane (GO:0016021);; Biological Process: cytokine-mediated signaling pathway (GO:0019221);; Molecular Function: interleukin-20 binding (GO:0042015);;	K05132|1.23623e-88|ssc:100152238|K05132 interferon gamma receptor 1 | (RefSeq) IFNGR1; interferon gamma receptor 1	Cytokine-cytokine receptor interaction (ko04060);; HIF-1 signaling pathway (ko04066);; Osteoclast differentiation (ko04380);; Jak-STAT signaling pathway (ko04630);; Natural killer cell mediated cytotoxicity (ko04650);; Salmonella infection (ko05132);; Leishmaniasis (ko05140);; Chagas disease (American trypanosomiasis) (ko05142);; Toxoplasmosis (ko05145);; Tuberculosis (ko05152);; Measles (ko05162…	--	--	--	--	interferon gamma receptor 1 isoform X1 [Sus scrofa]
ONT.149.1	[R]	General function prediction only	Molecular Function: binding (GO:0005488);; Biological Process: peroxisome organization (GO:0007031);; Cellular Component: cytoplasmic part (GO:0044444);; Biological Process: single-organism cellular process (GO:0044763);; Biological Process: localization (GO:0051179);;	K13341|3.15447e-91|ssc:100152228|K13341 peroxin-7 | (RefSeq) PEX7; peroxisomal biogenesis factor 7	Peroxisome (ko04146)	[U]	Intracellular trafficking, secretion, and vesicular transport	WD domain, G-beta repeat	Histone-binding protein RBBP4 OS=Pongo abelii OX=9601 GN=RBBP4 PE=2 SV=3	peroxisomal biogenesis factor 7 isoform X1 [Sus scrofa]
ONT.149.2	[R]	General function prediction only	Biological Process: neuron migration (GO:0001764);; Biological Process: endochondral ossification (GO:0001958);; Molecular Function: peroxisome matrix targeting signal-2 binding (GO:0005053);; Cellular Component: peroxisomal matrix (GO:0005782);; Cellular Component: cytosol (GO:0005829);; Biological Process: fatty acid beta-oxidation (GO:0006635);; Biological Process: ether lipid biosynthetic pro…	K13341|6.15901e-79|ssc:100152228|K13341 peroxin-7 | (RefSeq) PEX7; peroxisomal biogenesis factor 7	Peroxisome (ko04146)	[U]	Intracellular trafficking, secretion, and vesicular transport	WD domain, G-beta repeat	--	peroxisomal biogenesis factor 7 isoform X1 [Sus scrofa]
ONT.149.3	[R]	General function prediction only	Biological Process: neuron migration (GO:0001764);; Biological Process: endochondral ossification (GO:0001958);; Molecular Function: peroxisome matrix targeting signal-2 binding (GO:0005053);; Cellular Component: peroxisomal matrix (GO:0005782);; Cellular Component: cytosol (GO:0005829);; Biological Process: fatty acid beta-oxidation (GO:0006635);; Biological Process: ether lipid biosynthetic pro…	K13341|1.90968e-96|lve:103082923|K13341 peroxin-7 | (RefSeq) PEX7; peroxisomal biogenesis factor 7	Peroxisome (ko04146)	[U]	Intracellular trafficking, secretion, and vesicular transport	--	Notchless protein homolog 1 OS=Pongo abelii OX=9601 GN=NLE1 PE=2 SV=3	PREDICTED: peroxisomal targeting signal 2 receptor [Lipotes vexillifer]
ONT.150.1	--	--	--	--	--	--	--	--	--	--
ONT.151.1	--	--	--	--	--	--	--	--	--	vesicle-trafficking protein SEC22a isoform X3 [Sus scrofa]
ONT.153.1	--	--	Cellular Component: nucleus (GO:0005634);; Biological Process: positive regulation of cellular process (GO:0048522);;	K13087|6.50394e-72|ssc:100462726|K13087 bcl2 associated transcription factor 1 | (RefSeq) BCLAF1; BCL2 associated transcription factor 1	--	--	--	THRAP3/BCLAF1 family;; THRAP3/BCLAF1 family	--	bcl-2-associated transcription factor 1 isoform X3 [Sus scrofa]
ONT.153.2	--	--	Molecular Function: DNA binding (GO:0003677);; Cellular Component: nucleolus (GO:0005730);; Cellular Component: nuclear speck (GO:0016607);; Biological Process: regulation of DNA-templated transcription in response to stress (GO:0043620);; Molecular Function: RNA binding (GO:0044822);; Biological Process: negative regulation of transcription, DNA-templated (GO:0045892);; Biological Process: posit…	K13087|3.78244e-159|hgl:101713953|K13087 bcl2 associated transcription factor 1 | (RefSeq) Bclaf1; BCL2 associated transcription factor 1	--	--	--	THRAP3/BCLAF1 family;; THRAP3/BCLAF1 family	--	PREDICTED: bcl-2-associated transcription factor 1 [Sorex araneus]
ONT.154.1	--	--	--	--	--	--	--	--	--	--
ONT.155.1	--	--	--	--	--	--	--	--	--	--
ONT.157.1	--	--	--	--	--	--	--	--	LINE-1 reverse transcriptase homolog OS=Nycticebus coucang OX=9470 PE=3 SV=1	hypothetical protein M91_02473, partial [Bos mutus]
ONT.158.1	--	--	--	--	--	--	--	--	--	--
ONT.160.1	[J]	Translation, ribosomal structure and biogenesis	Molecular Function: GTPase activity (GO:0003924);; Molecular Function: GTP binding (GO:0005525);; Cellular Component: intracellular (GO:0005622);; Biological Process: translation (GO:0006412);; Cellular Component: membrane (GO:0016020);; Biological Process: ribosome disassembly (GO:0032790);; Cellular Component: extracellular exosome (GO:0070062);;	K14416|0|fab:101808524|K14416 elongation factor 1 alpha-like protein | (RefSeq) HBS1L; HBS1 like translational GTPase	mRNA surveillance pathway (ko03015)	[J]	Translation, ribosomal structure and biogenesis	Elongation factor Tu GTP binding domain;; HBS1 N-terminus;; 50S ribosome-binding GTPase;; Elongation factor Tu C-terminal domain	HBS1-like protein OS=Bos taurus OX=9913 GN=HBS1L PE=2 SV=1	PREDICTED: HBS1-like protein [Elephantulus edwardii]
ONT.160.2	--	--	--	K14416|1.41426e-122|ssc:100158211|K14416 elongation factor 1 alpha-like protein | (RefSeq) HBS1L; HBS1 like translational GTPase	mRNA surveillance pathway (ko03015);; Legionellosis (ko05134)	--	--	--	HBS1-like protein OS=Bos taurus OX=9913 GN=HBS1L PE=2 SV=1	HBS1-like protein isoform X4 [Sus scrofa]
ONT.160.5	[J]	Translation, ribosomal structure and biogenesis	Molecular Function: nucleotide binding (GO:0000166);; Molecular Function: GTPase activity (GO:0003924);; Cellular Component: intracellular (GO:0005622);; Biological Process: translation (GO:0006412);; Biological Process: ribosome disassembly (GO:0032790);;	K14416|0|bta:541083|K14416 elongation factor 1 alpha-like protein | (RefSeq) HBS1L; HBS1 like translational GTPase	mRNA surveillance pathway (ko03015);; Legionellosis (ko05134)	[J]	Translation, ribosomal structure and biogenesis	Elongation factor Tu GTP binding domain	HBS1-like protein OS=Bos taurus OX=9913 GN=HBS1L PE=2 SV=1	HBS1-like protein isoform X2 [Trichechus manatus latirostris]
ONT.160.6	--	--	Molecular Function: translation elongation factor activity (GO:0003746);; Molecular Function: GTPase activity (GO:0003924);; Molecular Function: GTP binding (GO:0005525);; Cellular Component: intracellular (GO:0005622);; Biological Process: translational elongation (GO:0006414);; Cellular Component: membrane (GO:0016020);; Biological Process: ribosome disassembly (GO:0032790);; Cellular Component…	K14416|2.27089e-71|ssc:100158211|K14416 elongation factor 1 alpha-like protein | (RefSeq) HBS1L; HBS1 like translational GTPase	mRNA surveillance pathway (ko03015);; Legionellosis (ko05134)	--	--	HBS1 N-terminus	HBS1-like protein OS=Bos taurus OX=9913 GN=HBS1L PE=2 SV=1	HBS1-like protein isoform X2 [Sus scrofa]
ONT.162.3	[R]	General function prediction only	Molecular Function: channel regulator activity (GO:0016247);; Molecular Function: kinase activity (GO:0016301);; Biological Process: single-organism cellular process (GO:0044763);; Biological Process: regulation of cellular process (GO:0050794);;	K13304|1.07784e-30|sko:100367908|K13304 serum/glucocorticoid-regulated kinase 3 [EC:2.7.11.1] | (RefSeq) serine/threonine-protein kinase Sgk3-like	--	[RT]	General function prediction only;; Signal transduction mechanisms	--	Serine/threonine-protein kinase Sgk1 OS=Bos taurus OX=9913 GN=SGK1 PE=2 SV=1	serine/threonine-protein kinase Sgk1 isoform X4 [Sus scrofa]
ONT.162.5	--	--	Molecular Function: nucleotide binding (GO:0000166);; Biological Process: regulation of cell growth (GO:0001558);; Molecular Function: protein serine/threonine kinase activity (GO:0004674);; Molecular Function: calcium channel regulator activity (GO:0005246);; Cellular Component: nucleus (GO:0005634);; Cellular Component: cytoplasm (GO:0005737);; Biological Process: cellular sodium ion homeostasi…	K13302|7.72633e-14|ssc:100625739|K13302 serum/glucocorticoid-regulated kinase 1 [EC:2.7.11.1] | (RefSeq) SGK1; serum/glucocorticoid regulated kinase 1	FoxO signaling pathway (ko04068);; mTOR signaling pathway (ko04150);; PI3K-Akt signaling pathway (ko04151);; Aldosterone-regulated sodium reabsorption (ko04960)	[RT]	General function prediction only;; Signal transduction mechanisms	Protein kinase C terminal domain	Serine/threonine-protein kinase Sgk1 OS=Bos taurus OX=9913 GN=SGK1 PE=2 SV=1	PREDICTED: serine/threonine-protein kinase Sgk1 isoform X4 [Myotis davidii]
ONT.163.1	[G]	Carbohydrate transport and metabolism	Molecular Function: sugar:proton symporter activity (GO:0005351);; Molecular Function: glucose transmembrane transporter activity (GO:0005355);; Cellular Component: integral component of plasma membrane (GO:0005887);; Biological Process: hexose transmembrane transport (GO:0035428);; Biological Process: glucose import (GO:0046323);;	K08149|2.18022e-149|ssc:100517381|K08149 MFS transporter, SP family, solute carrier family 2 (facilitated glucose transporter), member 12 | (RefSeq) SLC2A12; solute carrier family 2 member 12	--	[R]	General function prediction only	Sugar (and other) transporter;; Sugar (and other) transporter	Solute carrier family 2, facilitated glucose transporter member 12 OS=Bos taurus OX=9913 GN=SLC2A12 PE=1 SV=1	solute carrier family 2, facilitated glucose transporter member 12 isoform X1 [Sus scrofa]
ONT.164.1	--	--	Biological Process: nucleobase-containing compound biosynthetic process (GO:0034654);; Biological Process: single-organism process (GO:0044699);;	K03120|4.42666e-50|tup:102498567|K03120 transcription initiation factor TFIID TATA-box-binding protein | (RefSeq) TBPL1; TATA-box binding protein like 1	Basal transcription factors (ko03022);; Huntington's disease (ko05016);; HTLV-I infection (ko05166);; Herpes simplex infection (ko05168);; Epstein-Barr virus infection (ko05169);; Viral carcinogenesis (ko05203)	[K]	Transcription	--	TATA box-binding protein-like protein 1 OS=Pongo abelii OX=9601 GN=TBPL1 PE=2 SV=1	PREDICTED: TATA box-binding protein-like protein 1 isoform X1 [Tupaia chinensis]
ONT.164.2	--	--	Biological Process: acrosome assembly (GO:0001675);; Molecular Function: DNA binding (GO:0003677);; Cellular Component: transcription factor TFIIA complex (GO:0005672);; Cellular Component: cytoplasm (GO:0005737);; Biological Process: dTTP biosynthetic process (GO:0006235);; Biological Process: DNA-templated transcription, initiation (GO:0006352);; Biological Process: regulation of transcription,…	K03120|9.91702e-37|mze:101483732|K03120 transcription initiation factor TFIID TATA-box-binding protein | (RefSeq) tbpl1; TATA-box binding protein like 1	Basal transcription factors (ko03022);; Herpes simplex infection (ko05168)	[K]	Transcription	Transcription factor TFIID (or TATA-binding protein, TBP)	TATA box-binding protein-like protein 1 OS=Macaca fascicularis OX=9541 GN=TBPL1 PE=2 SV=1	TATA box-binding protein-like protein 1 isoform X1 [Canis lupus familiaris]
ONT.166.1	--	--	--	--	--	--	--	--	--	--
ONT.167.1	--	--	--	--	--	--	--	--	--	--
ONT.168.5	--	--	--	--	--	--	--	--	--	--
ONT.168.3	--	--	--	--	--	--	--	--	--	--
ONT.168.9	--	--	--	--	--	--	--	--	--	--
ONT.168.11	--	--	--	--	--	--	--	--	--	--
ONT.170.1	--	--	--	--	--	--	--	--	--	--
ONT.170.3	--	--	--	--	--	--	--	--	--	--
ONT.170.4	--	--	--	--	--	--	--	--	--	--
ONT.170.5	--	--	--	--	--	--	--	--	--	--
ONT.171.1	--	--	Molecular Function: structural constituent of ribosome (GO:0003735);; Biological Process: translation (GO:0006412);; Cellular Component: membrane (GO:0016020);; Cellular Component: cytosolic small ribosomal subunit (GO:0022627);; Molecular Function: RNA binding (GO:0044822);;	K02951|1.23909e-69|tgu:100223758|K02951 small subunit ribosomal protein S12e | (RefSeq) RPS12; ribosomal protein S12	Ribosome (ko03010)	[J]	Translation, ribosomal structure and biogenesis	Ribosomal protein L7Ae/L30e/S12e/Gadd45 family	40S ribosomal protein S12 OS=Sus scrofa OX=9823 GN=RPS12 PE=2 SV=2	PREDICTED: 40S ribosomal protein S12 [Pteropus alecto]
ONT.171.3	--	--	Cellular Component: intracellular ribonucleoprotein complex (GO:0030529);;	K02951|6.1305e-20|phd:102331565|K02951 small subunit ribosomal protein S12e | (RefSeq) RPS12; ribosomal protein S12	Ribosome (ko03010)	[J]	Translation, ribosomal structure and biogenesis	--	40S ribosomal protein S12 OS=Sus scrofa OX=9823 GN=RPS12 PE=2 SV=2	PREDICTED: 40S ribosomal protein S12 isoform X1 [Pantholops hodgsonii]
ONT.171.4	--	--	Molecular Function: structural constituent of ribosome (GO:0003735);; Biological Process: translation (GO:0006412);; Cellular Component: membrane (GO:0016020);; Cellular Component: cytosolic small ribosomal subunit (GO:0022627);; Molecular Function: RNA binding (GO:0044822);;	K02951|2.65399e-45|pale:102893593|K02951 small subunit ribosomal protein S12e | (RefSeq) RPS12; ribosomal protein S12	Ribosome (ko03010)	[J]	Translation, ribosomal structure and biogenesis	--	40S ribosomal protein S12 OS=Sus scrofa OX=9823 GN=RPS12 PE=2 SV=2	40S ribosomal protein S12 [Pteropus alecto]
ONT.171.7	--	--	Molecular Function: structural constituent of ribosome (GO:0003735);; Molecular Function: motor activity (GO:0003774);; Molecular Function: actin binding (GO:0003779);; Molecular Function: ATP binding (GO:0005524);; Biological Process: translation (GO:0006412);; Cellular Component: membrane (GO:0016020);; Cellular Component: myosin complex (GO:0016459);; Cellular Component: cytosolic small riboso…	K02951|3.46684e-27|pss:102447891|K02951 small subunit ribosomal protein S12e | (RefSeq) RPS12; ribosomal protein S12	Ribosome (ko03010)	[J]	Translation, ribosomal structure and biogenesis	--	40S ribosomal protein S12 OS=Sus scrofa OX=9823 GN=RPS12 PE=2 SV=2	Myosin-Vb [Tupaia chinensis]
ONT.171.8	--	--	Cellular Component: ribosome (GO:0005840);;	K02951|8.95033e-17|pale:102893593|K02951 small subunit ribosomal protein S12e | (RefSeq) RPS12; ribosomal protein S12	Ribosome (ko03010)	[J]	Translation, ribosomal structure and biogenesis	--	40S ribosomal protein S12 OS=Sus scrofa OX=9823 GN=RPS12 PE=2 SV=2	40S ribosomal protein S12-like [Dasypus novemcinctus]
ONT.172.1	--	--	Cellular Component: immunological synapse (GO:0001772);; Biological Process: positive regulation of T cell mediated cytotoxicity (GO:0001916);; Molecular Function: SNAP receptor activity (GO:0005484);; Cellular Component: lysosomal membrane (GO:0005765);; Cellular Component: early endosome (GO:0005769);; Cellular Component: late endosome (GO:0005770);; Biological Process: intracellular protein tr…	K08488|8.29941e-74|ssc:100153196|K08488 syntaxin 7 | (RefSeq) STX7; syntaxin 7	SNARE interactions in vesicular transport (ko04130);; Phagosome (ko04145)	[U]	Intracellular trafficking, secretion, and vesicular transport	--	Syntaxin-7 OS=Bos taurus OX=9913 GN=STX7 PE=2 SV=1	PREDICTED: syntaxin-7 isoform X1 [Manis javanica]
ONT.172.3	--	--	Molecular Function: SNARE binding (GO:0000149);; Molecular Function: SNAP receptor activity (GO:0005484);; Cellular Component: lysosome (GO:0005764);; Cellular Component: endosome (GO:0005768);; Cellular Component: plasma membrane (GO:0005886);; Biological Process: intracellular protein transport (GO:0006886);; Biological Process: vesicle fusion (GO:0006906);; Cellular Component: integral compone…	K08488|3.77104e-50|cjc:100413538|K08488 syntaxin 7 | (RefSeq) STX7, syntaxin-7; syntaxin 7	SNARE interactions in vesicular transport (ko04130);; Phagosome (ko04145)	[U]	Intracellular trafficking, secretion, and vesicular transport	--	Syntaxin-7 OS=Bos taurus OX=9913 GN=STX7 PE=2 SV=1	PREDICTED: syntaxin-7 [Condylura cristata]
ONT.173.1	--	--	Molecular Function: protein binding (GO:0005515);; Biological Process: signal transduction (GO:0007165);; Biological Process: macromolecule metabolic process (GO:0043170);; Biological Process: cellular metabolic process (GO:0044237);; Biological Process: single-organism cellular process (GO:0044763);; Biological Process: positive regulation of cellular process (GO:0048522);; Biological Process: s…	K06827|1.92009e-19|cfr:102508035|K06827 connective tissue growth factor | (RefSeq) CTGF; connective tissue growth factor	Hippo signaling pathway (ko04390)	--	--	--	Connective tissue growth factor OS=Sus scrofa OX=9823 GN=CTGF PE=2 SV=1	similar to connective tissue growth factor precursor, partial [Bos taurus]
ONT.175.1	--	--	Molecular Function: nucleotide diphosphatase activity (GO:0004551);; Molecular Function: protein binding (GO:0005515);; Biological Process: generation of precursor metabolites and energy (GO:0006091);; Biological Process: nucleoside phosphate metabolic process (GO:0006753);; Biological Process: transport (GO:0006810);; Biological Process: negative regulation of macromolecule metabolic process (GO…	K01513|6.79564e-14|ssc:100037271|K01513 ectonucleotide pyrophosphatase/phosphodiesterase family member 1/3 [EC:3.1.4.1 3.6.1.9] | (RefSeq) ENPP1, NPP1, PC-1; ectonucleotide pyrophosphatase/phosphodiesterase 1	Purine metabolism (ko00230);; Starch and sucrose metabolism (ko00500);; Nicotinate and nicotinamide metabolism (ko00760);; Pantothenate and CoA biosynthesis (ko00770)	[R]	General function prediction only	--	--	ecto-nucleotide pyrophosphatase/phosphodiesterase 1, partial [Sus scrofa]
ONT.176.2	--	--	Cellular Component: nucleus (GO:0005634);; Cellular Component: cytosol (GO:0005829);; Molecular Function: protein kinase binding (GO:0019901);; Molecular Function: protein kinase A regulatory subunit binding (GO:0034237);;	K16524|2.31596e-26|umr:103663413|K16524 A-kinase anchor protein 7 | (RefSeq) A-kinase anchor protein 7 isoforms alpha and beta-like	--	--	--	--	--	PREDICTED: A-kinase anchor protein 7 isoform X4 [Rhinolophus sinicus]
ONT.176.3	--	--	Molecular Function: SNARE binding (GO:0000149);; Molecular Function: SNAP receptor activity (GO:0005484);; Biological Process: exocytosis (GO:0006887);; Biological Process: ER to Golgi vesicle-mediated transport (GO:0006888);; Cellular Component: SNARE complex (GO:0031201);; Biological Process: vesicle fusion with Golgi apparatus (GO:0048280);;	--	--	--	--	--	--	vesicle-trafficking protein SEC22a isoform X3 [Sus scrofa]
ONT.177.1	--	--	Molecular Function: cytoskeletal protein binding (GO:0008092);; Cellular Component: membrane (GO:0016020);; Cellular Component: cell junction (GO:0030054);; Cellular Component: nuclear part (GO:0044428);;	K06107|1.29209e-51|bta:538959|K06107 erythrocyte membrane protein band 4.1 | (RefSeq) EPB41L2; erythrocyte membrane protein band 4.1 like 2	Tight junction (ko04530)	[R]	General function prediction only	--	Protein 4.1 OS=Bos taurus OX=9913 GN=EPB41 PE=2 SV=1	band 4.1-like protein 2 isoform X6 [Sus scrofa]
ONT.177.2	--	--	Molecular Function: actin binding (GO:0003779);; Molecular Function: structural molecule activity (GO:0005198);; Cellular Component: nucleoplasm (GO:0005654);; Cellular Component: cytoplasm (GO:0005737);; Cellular Component: cytoskeleton (GO:0005856);; Cellular Component: plasma membrane (GO:0005886);; Cellular Component: focal adhesion (GO:0005925);; Cellular Component: COP9 signalosome (GO:0008…	K06107|3.54575e-34|cfr:102519635|K06107 erythrocyte membrane protein band 4.1 | (RefSeq) EPB41L2; erythrocyte membrane protein band 4.1 like 2	Tight junction (ko04530)	[R]	General function prediction only	--	Protein 4.1 OS=Canis lupus familiaris OX=9615 GN=EPB41 PE=2 SV=1	band 4.1-like protein 2 isoform X19 [Sus scrofa]
ONT.179.1	--	--	Biological Process: single-organism process (GO:0044699);; Biological Process: regulation of cellular process (GO:0050794);;	K20639|4.85587e-102|bacu:102999777|K20639 Rho GTPase-activating protein 18/28/40 | (RefSeq) ARHGAP18; Rho GTPase activating protein 18	--	[T]	Signal transduction mechanisms	RhoGAP domain	--	rho GTPase-activating protein 18 isoform X1 [Physeter catodon]
ONT.180.1	--	--	--	--	--	--	--	--	--	--
ONT.181.9	--	--	Molecular Function: protein binding (GO:0005515);; Cellular Component: nucleus (GO:0005634);; Cellular Component: cytoplasm (GO:0005737);; Biological Process: regulation of transcription, DNA-templated (GO:0006355);; Biological Process: cellular component organization (GO:0016043);; Biological Process: single-organism cellular process (GO:0044763);; Biological Process: positive regulation of cell…	--	--	--	--	--	--	CREB-regulated transcription coactivator 2 isoform X3 [Sus scrofa]
ONT.182.1	--	--	--	K05637|6.71786e-12|bacu:102998029|K05637 laminin, alpha 1/2 | (RefSeq) LAMA2; laminin subunit alpha 2	PI3K-Akt signaling pathway (ko04151);; Focal adhesion (ko04510);; ECM-receptor interaction (ko04512);; Toxoplasmosis (ko05145);; Amoebiasis (ko05146);; Pathways in cancer (ko05200);; Small cell lung cancer (ko05222)	[W]	Extracellular structures	--	--	laminin subunit alpha-2-like [Odocoileus virginianus texanus]
ONT.183.1	--	--	Molecular Function: SNARE binding (GO:0000149);; Molecular Function: SNAP receptor activity (GO:0005484);; Biological Process: exocytosis (GO:0006887);; Biological Process: ER to Golgi vesicle-mediated transport (GO:0006888);; Cellular Component: SNARE complex (GO:0031201);; Biological Process: vesicle fusion with Golgi apparatus (GO:0048280);;	--	--	--	--	--	--	vesicle-trafficking protein SEC22a isoform X4 [Sus scrofa]
ONT.185.1	--	--	--	--	--	--	--	Domain of unknown function (DUF4482)	--	PREDICTED: uncharacterized protein KIAA0408 homolog [Ceratotherium simum simum]
ONT.185.2	--	--	--	--	--	--	--	--	--	PREDICTED: uncharacterized protein KIAA0408 homolog isoform X1 [Camelus bactrianus]
ONT.185.4	--	--	--	--	--	--	--	--	--	uncharacterized protein KIAA0408 homolog [Sus scrofa]
ONT.185.7	--	--	--	--	--	--	--	--	--	alpha-fetoprotein-like isoform X2 [Sus scrofa]
ONT.186.1	--	--	--	--	--	--	--	--	--	--
ONT.187.1	--	--	--	--	--	--	--	--	--	--
ONT.188.1	--	--	--	--	--	--	--	--	--	--
ONT.189.1	--	--	--	--	--	--	--	--	--	--
ONT.190.1	--	--	--	K18426|3.56764e-54|ecb:100073045|K18426 ethylmalonyl-CoA/methylmalonyl-CoA decarboxylase [EC:4.1.1.94 4.1.1.41] | (RefSeq) ECHDC1; ethylmalonyl-CoA decarboxylase 1	Propanoate metabolism (ko00640)	[I]	Lipid transport and metabolism	--	Ethylmalonyl-CoA decarboxylase OS=Bos taurus OX=9913 GN=ECHDC1 PE=2 SV=1	PREDICTED: ethylmalonyl-CoA decarboxylase [Condylura cristata]
ONT.190.2	[I]	Lipid transport and metabolism	--	K18426|2.70973e-83|ssc:100512509|K18426 ethylmalonyl-CoA/methylmalonyl-CoA decarboxylase [EC:4.1.1.94 4.1.1.41] | (RefSeq) ECHDC1; ethylmalonyl-CoA decarboxylase 1	Propanoate metabolism (ko00640)	[I]	Lipid transport and metabolism	Enoyl-CoA hydratase/isomerase	Ethylmalonyl-CoA decarboxylase OS=Bos taurus OX=9913 GN=ECHDC1 PE=2 SV=1	ethylmalonyl-CoA decarboxylase isoform X1 [Sus scrofa]
ONT.190.3	--	--	--	K18426|2.8723e-55|chx:102178542|K18426 ethylmalonyl-CoA/methylmalonyl-CoA decarboxylase [EC:4.1.1.94 4.1.1.41] | (RefSeq) ECHDC1; ethylmalonyl-CoA decarboxylase 1	Propanoate metabolism (ko00640)	[I]	Lipid transport and metabolism	--	Ethylmalonyl-CoA decarboxylase OS=Pongo abelii OX=9601 GN=ECHDC1 PE=2 SV=1	PREDICTED: ethylmalonyl-CoA decarboxylase isoform X2 [Capra hircus]
ONT.190.4	--	--	Molecular Function: catalytic activity (GO:0003824);; Biological Process: metabolic process (GO:0008152);;	K18426|9.66776e-68|ssc:100512509|K18426 ethylmalonyl-CoA/methylmalonyl-CoA decarboxylase [EC:4.1.1.94 4.1.1.41] | (RefSeq) ECHDC1; ethylmalonyl-CoA decarboxylase 1	Propanoate metabolism (ko00640)	[I]	Lipid transport and metabolism	--	Ethylmalonyl-CoA decarboxylase OS=Bos taurus OX=9913 GN=ECHDC1 PE=2 SV=1	ethylmalonyl-CoA decarboxylase isoform X1 [Sus scrofa]
ONT.190.5	[I]	Lipid transport and metabolism	Cellular Component: cytosol (GO:0005829);; Biological Process: metabolic process (GO:0008152);; Molecular Function: carboxy-lyase activity (GO:0016831);; Cellular Component: extracellular exosome (GO:0070062);;	K18426|2.12345e-80|mdo:100030825|K18426 ethylmalonyl-CoA/methylmalonyl-CoA decarboxylase [EC:4.1.1.94 4.1.1.41] | (RefSeq) ECHDC1; ethylmalonyl-CoA decarboxylase 1	Propanoate metabolism (ko00640)	[I]	Lipid transport and metabolism	--	Ethylmalonyl-CoA decarboxylase OS=Pongo abelii OX=9601 GN=ECHDC1 PE=2 SV=1	PREDICTED: ethylmalonyl-CoA decarboxylase isoform X2 [Monodelphis domestica]
ONT.190.6	--	--	--	K18426|3.57561e-67|ssc:100512509|K18426 ethylmalonyl-CoA/methylmalonyl-CoA decarboxylase [EC:4.1.1.94 4.1.1.41] | (RefSeq) ECHDC1; ethylmalonyl-CoA decarboxylase 1	Propanoate metabolism (ko00640)	[I]	Lipid transport and metabolism	--	Ethylmalonyl-CoA decarboxylase OS=Bos taurus OX=9913 GN=ECHDC1 PE=2 SV=1	ethylmalonyl-CoA decarboxylase isoform X1 [Sus scrofa]
ONT.190.7	[I]	Lipid transport and metabolism	--	K18426|3.05239e-72|ssc:100512509|K18426 ethylmalonyl-CoA/methylmalonyl-CoA decarboxylase [EC:4.1.1.94 4.1.1.41] | (RefSeq) ECHDC1; ethylmalonyl-CoA decarboxylase 1	Propanoate metabolism (ko00640)	[I]	Lipid transport and metabolism	--	Ethylmalonyl-CoA decarboxylase OS=Bos taurus OX=9913 GN=ECHDC1 PE=2 SV=1	ethylmalonyl-CoA decarboxylase isoform X1 [Sus scrofa]
ONT.191.1	--	--	--	K15700|1.77437e-58|myb:102258765|K15700 E3 ubiquitin-protein ligase RNF146 [EC:2.3.2.27] | (RefSeq) RNF146; ring finger protein 146	--	[O]	Posttranslational modification, protein turnover, chaperones	--	E3 ubiquitin-protein ligase RNF146 OS=Pongo abelii OX=9601 GN=RNF146 PE=2 SV=1	PREDICTED: E3 ubiquitin-protein ligase RNF146 [Myotis brandtii]
ONT.191.3	--	--	Molecular Function: catalytic activity (GO:0003824);; Biological Process: protein ubiquitination (GO:0016567);; Molecular Function: metal ion binding (GO:0046872);;	K15700|3.24453e-106|ssc:100512692|K15700 E3 ubiquitin-protein ligase RNF146 [EC:2.3.2.27] | (RefSeq) RNF146; ring finger protein 146	--	[O]	Posttranslational modification, protein turnover, chaperones	WWE domain	E3 ubiquitin-protein ligase RNF146 OS=Pongo abelii OX=9601 GN=RNF146 PE=2 SV=1	E3 ubiquitin-protein ligase RNF146 isoform X2 [Sus scrofa]
ONT.191.4	--	--	Molecular Function: ubiquitin-protein transferase activity (GO:0004842);; Cellular Component: nucleus (GO:0005634);; Cellular Component: cytosol (GO:0005829);; Molecular Function: zinc ion binding (GO:0008270);; Molecular Function: ligase activity (GO:0016874);; Biological Process: protein ubiquitination involved in ubiquitin-dependent protein catabolic process (GO:0042787);; Biological Process: …	K15700|2.19839e-103|pale:102893063|K15700 E3 ubiquitin-protein ligase RNF146 [EC:2.3.2.27] | (RefSeq) RNF146; ring finger protein 146	--	[O]	Posttranslational modification, protein turnover, chaperones	WWE domain	E3 ubiquitin-protein ligase RNF146 OS=Ailuropoda melanoleuca OX=9646 GN=RNF146 PE=3 SV=1	E3 ubiquitin-protein ligase RNF146-like [Delphinapterus leucas]
ONT.191.5	--	--	Molecular Function: binding (GO:0005488);; Biological Process: protein ubiquitination (GO:0016567);;	K15700|1.48036e-57|ssc:100512692|K15700 E3 ubiquitin-protein ligase RNF146 [EC:2.3.2.27] | (RefSeq) RNF146; ring finger protein 146	--	[O]	Posttranslational modification, protein turnover, chaperones	--	E3 ubiquitin-protein ligase RNF146-B OS=Bos taurus OX=9913 GN=RNF146B PE=2 SV=1	E3 ubiquitin-protein ligase RNF146 isoform X1 [Sus scrofa]
ONT.191.6	--	--	Molecular Function: ubiquitin-protein transferase activity (GO:0004842);; Cellular Component: cytosol (GO:0005829);; Molecular Function: zinc ion binding (GO:0008270);; Molecular Function: ligase activity (GO:0016874);; Biological Process: protein ubiquitination involved in ubiquitin-dependent protein catabolic process (GO:0042787);; Biological Process: protein autoubiquitination (GO:0051865);; B…	K15700|1.24133e-63|mcc:712152|K15700 E3 ubiquitin-protein ligase RNF146 [EC:2.3.2.27] | (RefSeq) RNF146; ring finger protein 146	--	[O]	Posttranslational modification, protein turnover, chaperones	Zinc finger, C3HC4 type (RING finger);; Zinc finger, C3HC4 type (RING finger)	E3 ubiquitin-protein ligase RNF146 OS=Macaca fascicularis OX=9541 GN=RNF146 PE=2 SV=1	PREDICTED: E3 ubiquitin-protein ligase RNF146, partial [Bison bison bison]
ONT.191.8	--	--	Molecular Function: ubiquitin-protein transferase activity (GO:0004842);; Cellular Component: cytosol (GO:0005829);; Molecular Function: zinc ion binding (GO:0008270);; Molecular Function: ligase activity (GO:0016874);; Biological Process: protein ubiquitination involved in ubiquitin-dependent protein catabolic process (GO:0042787);; Biological Process: protein autoubiquitination (GO:0051865);; B…	K15700|1.10949e-84|ssc:100512692|K15700 E3 ubiquitin-protein ligase RNF146 [EC:2.3.2.27] | (RefSeq) RNF146; ring finger protein 146	--	[O]	Posttranslational modification, protein turnover, chaperones	--	E3 ubiquitin-protein ligase RNF146 OS=Macaca fascicularis OX=9541 GN=RNF146 PE=2 SV=1	E3 ubiquitin-protein ligase RNF146 isoform X1 [Sus scrofa]
ONT.194.1	--	--	Cellular Component: kinetochore (GO:0000776);; Molecular Function: DNA binding (GO:0003677);; Biological Process: chromosome segregation (GO:0007059);; Biological Process: mitotic cell cycle (GO:0007067);; Molecular Function: protein heterodimerization activity (GO:0046982);; Biological Process: kinetochore assembly (GO:0051382);;	--	--	--	--	--	--	centromere protein W isoform X2 [Sus scrofa]
ONT.195.1	[J]	Translation, ribosomal structure and biogenesis	--	K15430|1.04199e-171|ssc:100152782|K15430 tRNA (guanine10-N2)-methyltransferase [EC:2.1.1.214] | (RefSeq) TRMT11; tRNA methyltransferase 11 homolog	--	[L]	Replication, recombination and repair	--	tRNA (guanine(10)-N2)-methyltransferase homolog OS=Bos taurus OX=9913 GN=TRMT11 PE=2 SV=1	tRNA (guanine(10)-N2)-methyltransferase homolog isoform X1 [Sus scrofa]
ONT.196.2	[FGR]	Nucleotide transport and metabolism;; Carbohydrate transport and metabolism;; General function prediction only	Molecular Function: catalytic activity (GO:0003824);; Cellular Component: membrane-bounded organelle (GO:0043227);; Cellular Component: intracellular part (GO:0044424);;	--	--	[R]	General function prediction only	Scavenger mRNA decapping enzyme C-term binding	Histidine triad nucleotide-binding protein 3 OS=Bos taurus OX=9913 GN=HINT3 PE=2 SV=1	histidine triad nucleotide-binding protein 3 [Sus scrofa]
ONT.196.4	--	--	Molecular Function: catalytic activity (GO:0003824);;	--	--	[R]	General function prediction only	--	Histidine triad nucleotide-binding protein 3 OS=Bos taurus OX=9913 GN=HINT3 PE=2 SV=1	PREDICTED: histidine triad nucleotide-binding protein 3 [Ceratotherium simum simum]
ONT.196.5	--	--	--	--	--	[R]	General function prediction only	--	Histidine triad nucleotide-binding protein 3 OS=Bos taurus OX=9913 GN=HINT3 PE=2 SV=1	histidine triad nucleotide-binding protein 3 [Sus scrofa]
ONT.196.6	[FGR]	Nucleotide transport and metabolism;; Carbohydrate transport and metabolism;; General function prediction only	Molecular Function: catalytic activity (GO:0003824);; Cellular Component: extracellular exosome (GO:0070062);;	--	--	[R]	General function prediction only	Scavenger mRNA decapping enzyme C-term binding	Histidine triad nucleotide-binding protein 3 OS=Pongo abelii OX=9601 GN=HINT3 PE=2 SV=1	histidine triad nucleotide-binding protein 3 [Sus scrofa]
ONT.196.7	--	--	--	--	--	[R]	General function prediction only	--	Histidine triad nucleotide-binding protein 3 OS=Bos taurus OX=9913 GN=HINT3 PE=2 SV=1	PREDICTED: histidine triad nucleotide-binding protein 3 [Myotis davidii]
ONT.197.1	--	--	Cellular Component: mitochondrion (GO:0005739);; Cellular Component: extracellular exosome (GO:0070062);;	K07023|1.83471e-12|mcc:716491|K07023 putative hydrolases of HD superfamily | (RefSeq) HDDC2; HD domain containing 2	--	[R]	General function prediction only	--	HD domain-containing protein 2 OS=Bos taurus OX=9913 GN=HDDC2 PE=2 SV=1	HD domain-containing protein 2 isoform X2 [Sus scrofa]
ONT.197.5	--	--	--	K07023|4.43708e-19|gja:107121018|K07023 putative hydrolases of HD superfamily | (RefSeq) HDDC2; HD domain containing 2	--	[R]	General function prediction only	HD domain	HD domain-containing protein 2 OS=Bos taurus OX=9913 GN=HDDC2 PE=2 SV=1	HD domain-containing protein 2 isoform X2 [Sus scrofa]
ONT.197.7	--	--	Cellular Component: mitochondrion (GO:0005739);; Cellular Component: extracellular exosome (GO:0070062);;	K07023|2.01318e-38|ptg:102963354|K07023 putative hydrolases of HD superfamily | (RefSeq) HDDC2; HD domain containing 2	--	[R]	General function prediction only	HD domain	HD domain-containing protein 2 OS=Bos taurus OX=9913 GN=HDDC2 PE=2 SV=1	PREDICTED: HD domain-containing protein 2 [Panthera tigris altaica]
ONT.198.1	--	--	Molecular Function: receptor binding (GO:0005102);; Cellular Component: plasma membrane (GO:0005886);; Biological Process: release of sequestered calcium ion into cytosol by sarcoplasmic reticulum (GO:0014808);; Cellular Component: integral component of membrane (GO:0016021);; Cellular Component: sarcoplasmic reticulum (GO:0016529);; Biological Process: heart contraction (GO:0060047);;	--	--	--	--	--	Triadin OS=Canis lupus familiaris OX=9615 GN=TRDN PE=1 SV=2	triadin isoform X2 [Sus scrofa]
ONT.198.2	--	--	Molecular Function: receptor binding (GO:0005102);; Cellular Component: plasma membrane (GO:0005886);; Biological Process: release of sequestered calcium ion into cytosol by sarcoplasmic reticulum (GO:0014808);; Cellular Component: integral component of membrane (GO:0016021);; Cellular Component: sarcoplasmic reticulum (GO:0016529);; Biological Process: heart contraction (GO:0060047);;	--	--	--	--	--	Triadin OS=Canis lupus familiaris OX=9615 GN=TRDN PE=1 SV=2	PREDICTED: triadin [Bubalus bubalis]
ONT.198.3	--	--	Molecular Function: receptor binding (GO:0005102);; Cellular Component: voltage-gated calcium channel complex (GO:0005891);; Biological Process: muscle contraction (GO:0006936);; Biological Process: regulation of release of sequestered calcium ion into cytosol by sarcoplasmic reticulum (GO:0010880);; Cellular Component: junctional sarcoplasmic reticulum membrane (GO:0014701);; Molecular Function:…	--	--	--	--	Aspartyl beta-hydroxylase N-terminal region	Triadin OS=Canis lupus familiaris OX=9615 GN=TRDN PE=1 SV=2	Triadin [Pteropus alecto]
ONT.198.4	--	--	Cellular Component: cytoplasm (GO:0005737);; Cellular Component: membrane (GO:0016020);;	--	--	--	--	--	Triadin OS=Oryctolagus cuniculus OX=9986 GN=TRDN PE=1 SV=3	Triadin [Pteropus alecto]
ONT.198.5	--	--	Molecular Function: receptor binding (GO:0005102);; Cellular Component: voltage-gated calcium channel complex (GO:0005891);; Biological Process: muscle contraction (GO:0006936);; Biological Process: regulation of release of sequestered calcium ion into cytosol by sarcoplasmic reticulum (GO:0010880);; Cellular Component: junctional sarcoplasmic reticulum membrane (GO:0014701);; Molecular Function:…	--	--	--	--	Aspartyl beta-hydroxylase N-terminal region	Triadin OS=Canis lupus familiaris OX=9615 GN=TRDN PE=1 SV=2	Triadin [Pteropus alecto]
ONT.198.6	--	--	Molecular Function: receptor binding (GO:0005102);; Cellular Component: plasma membrane (GO:0005886);; Biological Process: release of sequestered calcium ion into cytosol by sarcoplasmic reticulum (GO:0014808);; Cellular Component: integral component of membrane (GO:0016021);; Cellular Component: sarcoplasmic reticulum membrane (GO:0033017);; Biological Process: heart contraction (GO:0060047);;	--	--	--	--	--	Triadin OS=Oryctolagus cuniculus OX=9986 GN=TRDN PE=1 SV=3	triadin isoform X2 [Sus scrofa]
ONT.198.7	--	--	Molecular Function: receptor binding (GO:0005102);; Cellular Component: voltage-gated calcium channel complex (GO:0005891);; Biological Process: muscle contraction (GO:0006936);; Biological Process: regulation of release of sequestered calcium ion into cytosol by sarcoplasmic reticulum (GO:0010880);; Cellular Component: junctional sarcoplasmic reticulum membrane (GO:0014701);; Molecular Function:…	--	--	--	--	--	Triadin OS=Canis lupus familiaris OX=9615 GN=TRDN PE=1 SV=2	Triadin [Pteropus alecto]
ONT.198.8	--	--	Molecular Function: receptor binding (GO:0005102);; Cellular Component: plasma membrane (GO:0005886);; Biological Process: muscle contraction (GO:0006936);; Biological Process: regulation of cell communication by electrical coupling (GO:0010649);; Biological Process: regulation of release of sequestered calcium ion into cytosol by sarcoplasmic reticulum (GO:0010880);; Cellular Component: junction…	--	--	--	--	--	Triadin OS=Canis lupus familiaris OX=9615 GN=TRDN PE=1 SV=2	Triadin [Pteropus alecto]
ONT.198.9	--	--	Molecular Function: receptor binding (GO:0005102);; Cellular Component: voltage-gated calcium channel complex (GO:0005891);; Biological Process: muscle contraction (GO:0006936);; Biological Process: regulation of release of sequestered calcium ion into cytosol by sarcoplasmic reticulum (GO:0010880);; Cellular Component: junctional sarcoplasmic reticulum membrane (GO:0014701);; Molecular Function:…	--	--	--	--	--	Triadin OS=Canis lupus familiaris OX=9615 GN=TRDN PE=1 SV=2	Triadin [Pteropus alecto]
ONT.198.10	--	--	Molecular Function: receptor binding (GO:0005102);; Cellular Component: voltage-gated calcium channel complex (GO:0005891);; Biological Process: muscle contraction (GO:0006936);; Biological Process: regulation of release of sequestered calcium ion into cytosol by sarcoplasmic reticulum (GO:0010880);; Cellular Component: junctional sarcoplasmic reticulum membrane (GO:0014701);; Molecular Function:…	--	--	--	--	Aspartyl beta-hydroxylase N-terminal region	Triadin OS=Canis lupus familiaris OX=9615 GN=TRDN PE=1 SV=2	Triadin [Pteropus alecto]
ONT.198.11	--	--	Molecular Function: receptor binding (GO:0005102);; Cellular Component: voltage-gated calcium channel complex (GO:0005891);; Biological Process: muscle contraction (GO:0006936);; Biological Process: regulation of release of sequestered calcium ion into cytosol by sarcoplasmic reticulum (GO:0010880);; Cellular Component: junctional sarcoplasmic reticulum membrane (GO:0014701);; Molecular Function:…	--	--	--	--	Aspartyl beta-hydroxylase N-terminal region	Triadin OS=Canis lupus familiaris OX=9615 GN=TRDN PE=1 SV=2	Triadin [Pteropus alecto]
ONT.198.12	--	--	Molecular Function: receptor binding (GO:0005102);; Cellular Component: plasma membrane (GO:0005886);; Biological Process: muscle contraction (GO:0006936);; Biological Process: regulation of cell communication by electrical coupling (GO:0010649);; Biological Process: regulation of release of sequestered calcium ion into cytosol by sarcoplasmic reticulum (GO:0010880);; Cellular Component: junction…	--	--	--	--	--	Triadin OS=Oryctolagus cuniculus OX=9986 GN=TRDN PE=1 SV=3	triadin isoform X1 [Sus scrofa]
ONT.198.13	--	--	Molecular Function: receptor binding (GO:0005102);; Cellular Component: plasma membrane (GO:0005886);; Biological Process: release of sequestered calcium ion into cytosol by sarcoplasmic reticulum (GO:0014808);; Cellular Component: integral component of membrane (GO:0016021);; Cellular Component: sarcoplasmic reticulum (GO:0016529);; Biological Process: heart contraction (GO:0060047);;	--	--	--	--	--	Triadin OS=Canis lupus familiaris OX=9615 GN=TRDN PE=1 SV=2	triadin-like [Odocoileus virginianus texanus]
ONT.198.14	--	--	Molecular Function: receptor binding (GO:0005102);; Cellular Component: voltage-gated calcium channel complex (GO:0005891);; Biological Process: muscle contraction (GO:0006936);; Biological Process: regulation of release of sequestered calcium ion into cytosol by sarcoplasmic reticulum (GO:0010880);; Cellular Component: junctional sarcoplasmic reticulum membrane (GO:0014701);; Molecular Function:…	--	--	--	--	Aspartyl beta-hydroxylase N-terminal region	Triadin OS=Canis lupus familiaris OX=9615 GN=TRDN PE=1 SV=2	Triadin [Pteropus alecto]
ONT.198.15	--	--	Molecular Function: receptor binding (GO:0005102);; Cellular Component: voltage-gated calcium channel complex (GO:0005891);; Biological Process: muscle contraction (GO:0006936);; Biological Process: regulation of release of sequestered calcium ion into cytosol by sarcoplasmic reticulum (GO:0010880);; Cellular Component: junctional sarcoplasmic reticulum membrane (GO:0014701);; Molecular Function:…	--	--	--	--	--	Triadin OS=Canis lupus familiaris OX=9615 GN=TRDN PE=1 SV=2	Triadin [Pteropus alecto]
ONT.198.16	--	--	Molecular Function: receptor binding (GO:0005102);; Cellular Component: voltage-gated calcium channel complex (GO:0005891);; Biological Process: muscle contraction (GO:0006936);; Biological Process: regulation of release of sequestered calcium ion into cytosol by sarcoplasmic reticulum (GO:0010880);; Cellular Component: junctional sarcoplasmic reticulum membrane (GO:0014701);; Molecular Function:…	--	--	--	--	Aspartyl beta-hydroxylase N-terminal region	Triadin OS=Canis lupus familiaris OX=9615 GN=TRDN PE=1 SV=2	Triadin [Pteropus alecto]
ONT.198.17	--	--	Molecular Function: receptor binding (GO:0005102);; Cellular Component: plasma membrane (GO:0005886);; Biological Process: muscle contraction (GO:0006936);; Biological Process: regulation of cell communication by electrical coupling (GO:0010649);; Biological Process: regulation of release of sequestered calcium ion into cytosol by sarcoplasmic reticulum (GO:0010880);; Cellular Component: junction…	--	--	--	--	--	Triadin OS=Canis lupus familiaris OX=9615 GN=TRDN PE=1 SV=2	triadin isoform X1 [Sus scrofa]
ONT.198.18	--	--	Molecular Function: receptor binding (GO:0005102);; Cellular Component: plasma membrane (GO:0005886);; Biological Process: release of sequestered calcium ion into cytosol by sarcoplasmic reticulum (GO:0014808);; Cellular Component: integral component of membrane (GO:0016021);; Cellular Component: sarcoplasmic reticulum (GO:0016529);; Biological Process: heart contraction (GO:0060047);;	--	--	--	--	--	Triadin OS=Oryctolagus cuniculus OX=9986 GN=TRDN PE=1 SV=3	triadin isoform X1 [Sus scrofa]
ONT.198.20	--	--	Molecular Function: receptor binding (GO:0005102);; Cellular Component: plasma membrane (GO:0005886);; Biological Process: release of sequestered calcium ion into cytosol by sarcoplasmic reticulum (GO:0014808);; Cellular Component: integral component of membrane (GO:0016021);; Cellular Component: sarcoplasmic reticulum (GO:0016529);; Biological Process: heart contraction (GO:0060047);;	--	--	--	--	--	Triadin OS=Canis lupus familiaris OX=9615 GN=TRDN PE=1 SV=2	Triadin [Pteropus alecto]
ONT.198.21	--	--	Molecular Function: receptor binding (GO:0005102);; Cellular Component: voltage-gated calcium channel complex (GO:0005891);; Biological Process: muscle contraction (GO:0006936);; Biological Process: regulation of release of sequestered calcium ion into cytosol by sarcoplasmic reticulum (GO:0010880);; Cellular Component: junctional sarcoplasmic reticulum membrane (GO:0014701);; Molecular Function:…	--	--	--	--	Aspartyl beta-hydroxylase N-terminal region	Triadin OS=Canis lupus familiaris OX=9615 GN=TRDN PE=1 SV=2	PREDICTED: triadin [Pantholops hodgsonii]
ONT.198.22	--	--	Molecular Function: receptor binding (GO:0005102);; Cellular Component: plasma membrane (GO:0005886);; Biological Process: release of sequestered calcium ion into cytosol by sarcoplasmic reticulum (GO:0014808);; Cellular Component: integral component of membrane (GO:0016021);; Cellular Component: sarcoplasmic reticulum membrane (GO:0033017);; Biological Process: heart contraction (GO:0060047);;	--	--	--	--	--	Triadin OS=Oryctolagus cuniculus OX=9986 GN=TRDN PE=1 SV=3	Triadin [Pteropus alecto]
ONT.198.23	--	--	Molecular Function: receptor binding (GO:0005102);; Cellular Component: plasma membrane (GO:0005886);; Biological Process: release of sequestered calcium ion into cytosol by sarcoplasmic reticulum (GO:0014808);; Cellular Component: integral component of membrane (GO:0016021);; Cellular Component: sarcoplasmic reticulum (GO:0016529);; Biological Process: heart contraction (GO:0060047);;	--	--	--	--	--	Triadin OS=Canis lupus familiaris OX=9615 GN=TRDN PE=1 SV=2	PREDICTED: triadin [Pantholops hodgsonii]
ONT.198.24	--	--	Molecular Function: receptor binding (GO:0005102);; Cellular Component: plasma membrane (GO:0005886);; Biological Process: release of sequestered calcium ion into cytosol by sarcoplasmic reticulum (GO:0014808);; Cellular Component: integral component of membrane (GO:0016021);; Cellular Component: sarcoplasmic reticulum (GO:0016529);; Biological Process: heart contraction (GO:0060047);;	--	--	--	--	--	Triadin OS=Canis lupus familiaris OX=9615 GN=TRDN PE=1 SV=2	triadin isoform X1 [Sus scrofa]
ONT.198.25	--	--	--	--	--	--	--	--	--	Triadin [Pteropus alecto]
ONT.198.27	--	--	Molecular Function: receptor binding (GO:0005102);; Cellular Component: plasma membrane (GO:0005886);; Biological Process: release of sequestered calcium ion into cytosol by sarcoplasmic reticulum (GO:0014808);; Cellular Component: integral component of membrane (GO:0016021);; Cellular Component: sarcoplasmic reticulum (GO:0016529);; Biological Process: heart contraction (GO:0060047);;	--	--	--	--	--	Triadin OS=Canis lupus familiaris OX=9615 GN=TRDN PE=1 SV=2	PREDICTED: triadin isoform X2 [Ovis aries musimon]
ONT.198.28	--	--	Molecular Function: receptor binding (GO:0005102);; Cellular Component: voltage-gated calcium channel complex (GO:0005891);; Biological Process: muscle contraction (GO:0006936);; Biological Process: regulation of release of sequestered calcium ion into cytosol by sarcoplasmic reticulum (GO:0010880);; Cellular Component: junctional sarcoplasmic reticulum membrane (GO:0014701);; Molecular Function:…	--	--	--	--	Aspartyl beta-hydroxylase N-terminal region	Triadin OS=Canis lupus familiaris OX=9615 GN=TRDN PE=1 SV=2	Triadin [Pteropus alecto]
ONT.198.29	--	--	Molecular Function: receptor binding (GO:0005102);; Cellular Component: plasma membrane (GO:0005886);; Biological Process: muscle contraction (GO:0006936);; Biological Process: regulation of cell communication by electrical coupling (GO:0010649);; Biological Process: regulation of release of sequestered calcium ion into cytosol by sarcoplasmic reticulum (GO:0010880);; Cellular Component: junction…	--	--	--	--	--	Triadin OS=Oryctolagus cuniculus OX=9986 GN=TRDN PE=1 SV=3	triadin isoform X1 [Sus scrofa]
ONT.198.30	--	--	Molecular Function: receptor binding (GO:0005102);; Cellular Component: voltage-gated calcium channel complex (GO:0005891);; Biological Process: muscle contraction (GO:0006936);; Biological Process: regulation of release of sequestered calcium ion into cytosol by sarcoplasmic reticulum (GO:0010880);; Cellular Component: junctional sarcoplasmic reticulum membrane (GO:0014701);; Molecular Function:…	--	--	--	--	Aspartyl beta-hydroxylase N-terminal region	Triadin OS=Canis lupus familiaris OX=9615 GN=TRDN PE=1 SV=2	Triadin [Pteropus alecto]
ONT.198.32	--	--	--	--	--	--	--	--	Triadin OS=Canis lupus familiaris OX=9615 GN=TRDN PE=1 SV=2	PREDICTED: triadin [Bos mutus]
ONT.198.33	--	--	Molecular Function: receptor binding (GO:0005102);; Cellular Component: voltage-gated calcium channel complex (GO:0005891);; Biological Process: muscle contraction (GO:0006936);; Biological Process: regulation of release of sequestered calcium ion into cytosol by sarcoplasmic reticulum (GO:0010880);; Cellular Component: junctional sarcoplasmic reticulum membrane (GO:0014701);; Molecular Function:…	--	--	--	--	Aspartyl beta-hydroxylase N-terminal region	Triadin OS=Canis lupus familiaris OX=9615 GN=TRDN PE=1 SV=2	PREDICTED: triadin-like [Ailuropoda melanoleuca]
ONT.198.34	--	--	Molecular Function: receptor binding (GO:0005102);; Cellular Component: plasma membrane (GO:0005886);; Biological Process: muscle contraction (GO:0006936);; Biological Process: regulation of cell communication by electrical coupling (GO:0010649);; Biological Process: regulation of release of sequestered calcium ion into cytosol by sarcoplasmic reticulum (GO:0010880);; Cellular Component: junction…	--	--	--	--	--	Triadin OS=Canis lupus familiaris OX=9615 GN=TRDN PE=1 SV=2	Triadin [Pteropus alecto]
ONT.198.36	--	--	Molecular Function: receptor binding (GO:0005102);; Cellular Component: voltage-gated calcium channel complex (GO:0005891);; Biological Process: muscle contraction (GO:0006936);; Biological Process: regulation of release of sequestered calcium ion into cytosol by sarcoplasmic reticulum (GO:0010880);; Cellular Component: junctional sarcoplasmic reticulum membrane (GO:0014701);; Molecular Function:…	--	--	--	--	--	Triadin OS=Canis lupus familiaris OX=9615 GN=TRDN PE=1 SV=2	triadin isoform X2 [Sus scrofa]
ONT.198.38	--	--	Molecular Function: receptor binding (GO:0005102);; Cellular Component: plasma membrane (GO:0005886);; Biological Process: release of sequestered calcium ion into cytosol by sarcoplasmic reticulum (GO:0014808);; Cellular Component: integral component of membrane (GO:0016021);; Cellular Component: sarcoplasmic reticulum (GO:0016529);; Biological Process: heart contraction (GO:0060047);;	--	--	--	--	Aspartyl beta-hydroxylase N-terminal region	Triadin OS=Canis lupus familiaris OX=9615 GN=TRDN PE=1 SV=2	triadin isoform X1 [Sus scrofa]
ONT.198.39	--	--	Molecular Function: receptor binding (GO:0005102);; Cellular Component: voltage-gated calcium channel complex (GO:0005891);; Biological Process: muscle contraction (GO:0006936);; Biological Process: regulation of release of sequestered calcium ion into cytosol by sarcoplasmic reticulum (GO:0010880);; Cellular Component: junctional sarcoplasmic reticulum membrane (GO:0014701);; Molecular Function:…	--	--	--	--	--	Triadin OS=Canis lupus familiaris OX=9615 GN=TRDN PE=1 SV=2	triadin isoform X1 [Pteropus vampyrus]
ONT.198.41	--	--	--	--	--	--	--	--	--	--
ONT.198.42	--	--	Molecular Function: receptor binding (GO:0005102);; Cellular Component: voltage-gated calcium channel complex (GO:0005891);; Biological Process: muscle contraction (GO:0006936);; Biological Process: regulation of release of sequestered calcium ion into cytosol by sarcoplasmic reticulum (GO:0010880);; Cellular Component: junctional sarcoplasmic reticulum membrane (GO:0014701);; Molecular Function:…	--	--	--	--	--	Triadin OS=Canis lupus familiaris OX=9615 GN=TRDN PE=1 SV=2	PREDICTED: LOW QUALITY PROTEIN: triadin [Leptonychotes weddellii]
ONT.198.45	--	--	Molecular Function: receptor binding (GO:0005102);; Cellular Component: plasma membrane (GO:0005886);; Biological Process: muscle contraction (GO:0006936);; Biological Process: regulation of cell communication by electrical coupling (GO:0010649);; Biological Process: regulation of release of sequestered calcium ion into cytosol by sarcoplasmic reticulum (GO:0010880);; Cellular Component: junction…	--	--	--	--	--	Triadin OS=Canis lupus familiaris OX=9615 GN=TRDN PE=1 SV=2	triadin isoform X2 [Sus scrofa]
ONT.198.46	--	--	Cellular Component: cytoplasm (GO:0005737);; Cellular Component: membrane (GO:0016020);;	--	--	--	--	--	Triadin OS=Canis lupus familiaris OX=9615 GN=TRDN PE=1 SV=2	triadin isoform X1 [Sus scrofa]
ONT.198.47	--	--	Molecular Function: receptor binding (GO:0005102);; Cellular Component: plasma membrane (GO:0005886);; Biological Process: release of sequestered calcium ion into cytosol by sarcoplasmic reticulum (GO:0014808);; Cellular Component: integral component of membrane (GO:0016021);; Cellular Component: sarcoplasmic reticulum (GO:0016529);; Biological Process: heart contraction (GO:0060047);;	--	--	--	--	--	Triadin OS=Canis lupus familiaris OX=9615 GN=TRDN PE=1 SV=2	triadin isoform X1 [Sus scrofa]
ONT.198.48	--	--	Molecular Function: receptor binding (GO:0005102);; Cellular Component: plasma membrane (GO:0005886);; Biological Process: release of sequestered calcium ion into cytosol by sarcoplasmic reticulum (GO:0014808);; Cellular Component: integral component of membrane (GO:0016021);; Cellular Component: sarcoplasmic reticulum (GO:0016529);; Biological Process: heart contraction (GO:0060047);;	--	--	--	--	--	Triadin OS=Canis lupus familiaris OX=9615 GN=TRDN PE=1 SV=2	triadin isoform X1 [Sus scrofa]
ONT.198.49	--	--	Molecular Function: receptor binding (GO:0005102);; Cellular Component: plasma membrane (GO:0005886);; Biological Process: release of sequestered calcium ion into cytosol by sarcoplasmic reticulum (GO:0014808);; Cellular Component: integral component of membrane (GO:0016021);; Cellular Component: sarcoplasmic reticulum (GO:0016529);; Biological Process: heart contraction (GO:0060047);;	--	--	--	--	--	Triadin OS=Canis lupus familiaris OX=9615 GN=TRDN PE=1 SV=2	triadin isoform X1 [Sus scrofa]
ONT.198.50	--	--	Molecular Function: receptor binding (GO:0005102);; Cellular Component: plasma membrane (GO:0005886);; Biological Process: release of sequestered calcium ion into cytosol by sarcoplasmic reticulum (GO:0014808);; Cellular Component: integral component of membrane (GO:0016021);; Cellular Component: sarcoplasmic reticulum (GO:0016529);; Biological Process: heart contraction (GO:0060047);;	--	--	--	--	--	Triadin OS=Oryctolagus cuniculus OX=9986 GN=TRDN PE=1 SV=3	triadin isoform X1 [Sus scrofa]
ONT.198.54	--	--	Molecular Function: receptor binding (GO:0005102);; Cellular Component: plasma membrane (GO:0005886);; Biological Process: release of sequestered calcium ion into cytosol by sarcoplasmic reticulum (GO:0014808);; Cellular Component: integral component of membrane (GO:0016021);; Cellular Component: sarcoplasmic reticulum (GO:0016529);; Biological Process: heart contraction (GO:0060047);;	--	--	--	--	--	Triadin OS=Oryctolagus cuniculus OX=9986 GN=TRDN PE=1 SV=3	triadin isoform X1 [Sus scrofa]
ONT.198.55	--	--	Molecular Function: receptor binding (GO:0005102);; Cellular Component: plasma membrane (GO:0005886);; Biological Process: release of sequestered calcium ion into cytosol by sarcoplasmic reticulum (GO:0014808);; Cellular Component: integral component of membrane (GO:0016021);; Cellular Component: sarcoplasmic reticulum (GO:0016529);; Biological Process: heart contraction (GO:0060047);;	--	--	--	--	--	Triadin OS=Canis lupus familiaris OX=9615 GN=TRDN PE=1 SV=2	triadin isoform X1 [Sus scrofa]
ONT.198.56	--	--	Molecular Function: receptor binding (GO:0005102);; Cellular Component: plasma membrane (GO:0005886);; Biological Process: release of sequestered calcium ion into cytosol by sarcoplasmic reticulum (GO:0014808);; Cellular Component: integral component of membrane (GO:0016021);; Cellular Component: sarcoplasmic reticulum (GO:0016529);; Biological Process: heart contraction (GO:0060047);;	--	--	--	--	--	Triadin OS=Canis lupus familiaris OX=9615 GN=TRDN PE=1 SV=2	triadin isoform X1 [Sus scrofa]
ONT.198.59	--	--	Cellular Component: cytoplasm (GO:0005737);; Cellular Component: membrane (GO:0016020);;	--	--	--	--	--	Triadin OS=Canis lupus familiaris OX=9615 GN=TRDN PE=1 SV=2	triadin isoform X1 [Sus scrofa]
ONT.198.63	--	--	--	--	--	--	--	--	--	--
ONT.198.64	--	--	Molecular Function: receptor binding (GO:0005102);; Cellular Component: plasma membrane (GO:0005886);; Biological Process: release of sequestered calcium ion into cytosol by sarcoplasmic reticulum (GO:0014808);; Cellular Component: integral component of membrane (GO:0016021);; Cellular Component: sarcoplasmic reticulum (GO:0016529);; Biological Process: heart contraction (GO:0060047);;	--	--	--	--	--	Triadin OS=Canis lupus familiaris OX=9615 GN=TRDN PE=1 SV=2	triadin isoform X1 [Sus scrofa]
ONT.198.68	--	--	--	--	--	--	--	--	--	--
ONT.198.70	--	--	--	--	--	--	--	--	--	--
ONT.198.71	--	--	--	--	--	--	--	--	--	--
ONT.198.72	--	--	--	--	--	--	--	--	--	--
ONT.199.1	--	--	Cellular Component: voltage-gated calcium channel complex (GO:0005891);; Biological Process: regulation of release of sequestered calcium ion into cytosol by sarcoplasmic reticulum (GO:0010880);; Molecular Function: protein binding, bridging (GO:0030674);; Cellular Component: sarcoplasmic reticulum membrane (GO:0033017);; Molecular Function: ion channel binding (GO:0044325);; Biological Process: …	--	--	--	--	--	Triadin OS=Canis lupus familiaris OX=9615 GN=TRDN PE=1 SV=2	PREDICTED: triadin-like isoform X4 [Equus przewalskii]
ONT.201.2	--	--	Cellular Component: nucleus (GO:0005634);; Biological Process: organelle organization (GO:0006996);; Biological Process: anatomical structure morphogenesis (GO:0009653);; Cellular Component: membrane (GO:0016020);; Biological Process: cell differentiation (GO:0030154);; Cellular Component: macromolecular complex (GO:0032991);; Biological Process: cellular protein metabolic process (GO:0044267);; …	--	--	--	--	--	--	cullin-7 isoform X1 [Sus scrofa]
ONT.201.3	--	--	--	--	--	--	--	--	--	--
ONT.201.5	--	--	--	--	--	--	--	--	--	--
ONT.201.6	--	--	--	--	--	--	--	--	--	--
ONT.201.7	--	--	--	--	--	--	--	--	--	--
ONT.201.8	--	--	Molecular Function: SNARE binding (GO:0000149);; Molecular Function: SNAP receptor activity (GO:0005484);; Biological Process: exocytosis (GO:0006887);; Biological Process: ER to Golgi vesicle-mediated transport (GO:0006888);; Cellular Component: integral component of membrane (GO:0016021);; Cellular Component: SNARE complex (GO:0031201);; Biological Process: vesicle fusion with Golgi apparatus (…	--	--	--	--	--	--	vesicle-trafficking protein SEC22a isoform X3 [Sus scrofa]
ONT.201.9	--	--	--	--	--	--	--	--	--	vesicle-trafficking protein SEC22a isoform X3 [Sus scrofa]
ONT.201.10	--	--	--	--	--	--	--	--	--	--
ONT.202.1	--	--	Molecular Function: receptor binding (GO:0005102);; Cellular Component: integral component of membrane (GO:0016021);; Cellular Component: sarcoplasmic reticulum (GO:0016529);;	--	--	--	--	--	Triadin OS=Canis lupus familiaris OX=9615 GN=TRDN PE=1 SV=2	PREDICTED: triadin-like [Hipposideros armiger]
ONT.203.1	--	--	--	--	--	--	--	--	--	--
ONT.204.1	[T]	Signal transduction mechanisms	Molecular Function: sphingomyelin phosphodiesterase activity (GO:0004767);; Cellular Component: extracellular space (GO:0005615);; Biological Process: sphingomyelin catabolic process (GO:0006685);; Cellular Component: extracellular exosome (GO:0070062);;	K01128|1.09427e-156|lve:103076546|K01128 sphingomyelin phosphodiesterase acid-like 3 [EC:3.1.4.-] | (RefSeq) SMPDL3A; sphingomyelin phosphodiesterase acid like 3A	--	[I]	Lipid transport and metabolism	--	Acid sphingomyelinase-like phosphodiesterase 3a OS=Bos taurus OX=9913 GN=SMPDL3A PE=2 SV=1	PREDICTED: acid sphingomyelinase-like phosphodiesterase 3a isoform X1 [Lipotes vexillifer]
ONT.204.2	[T]	Signal transduction mechanisms	--	K01128|1.2155e-92|ssc:100153442|K01128 sphingomyelin phosphodiesterase acid-like 3 [EC:3.1.4.-] | (RefSeq) SMPDL3A; sphingomyelin phosphodiesterase acid like 3A	--	[I]	Lipid transport and metabolism	--	Acid sphingomyelinase-like phosphodiesterase 3a OS=Bos taurus OX=9913 GN=SMPDL3A PE=2 SV=1	acid sphingomyelinase-like phosphodiesterase 3a isoform X1 [Sus scrofa]
ONT.204.3	--	--	--	K01128|5.7281e-100|ssc:100153442|K01128 sphingomyelin phosphodiesterase acid-like 3 [EC:3.1.4.-] | (RefSeq) SMPDL3A; sphingomyelin phosphodiesterase acid like 3A	--	[I]	Lipid transport and metabolism	--	Acid sphingomyelinase-like phosphodiesterase 3a OS=Bos taurus OX=9913 GN=SMPDL3A PE=2 SV=1	acid sphingomyelinase-like phosphodiesterase 3a isoform X1 [Sus scrofa]
ONT.204.6	--	--	--	K01128|7.48929e-09|ssc:100736941|K01128 sphingomyelin phosphodiesterase acid-like 3 [EC:3.1.4.-] | (RefSeq) acid sphingomyelinase-like phosphodiesterase 3a	--	--	--	--	--	acid sphingomyelinase-like phosphodiesterase 3a isoform X1 [Sus scrofa]
ONT.204.7	--	--	--	--	--	--	--	--	--	--
ONT.204.8	--	--	--	--	--	--	--	--	--	--
ONT.204.9	--	--	--	--	--	--	--	--	--	--
ONT.205.2	--	--	Molecular Function: cAMP-dependent protein kinase inhibitor activity (GO:0004862);; Cellular Component: nucleus (GO:0005634);; Cellular Component: cytoplasm (GO:0005737);; Biological Process: positive regulation of telomere maintenance (GO:0032206);; Biological Process: negative regulation of cAMP-dependent protein kinase activity (GO:2000480);; Biological Process: positive regulation of DNA bios…	--	--	--	--	cAMP-dependent protein kinase inhibitor	--	cAMP-dependent protein kinase inhibitor beta isoform X1 [Sus scrofa]
ONT.206.1	--	--	Cellular Component: endoplasmic reticulum (GO:0005783);; Biological Process: phospholipid metabolic process (GO:0006644);; Molecular Function: L-serine transmembrane transporter activity (GO:0015194);; Cellular Component: integral component of membrane (GO:0016021);; Biological Process: organonitrogen compound metabolic process (GO:1901564);;	--	--	[S]	Function unknown	Serine incorporator (Serinc);; Serine incorporator (Serinc);; Serine incorporator (Serinc);; Serine incorporator (Serinc);; Serine incorporator (Serinc)	Serine incorporator 1 OS=Bos taurus OX=9913 GN=SERINC1 PE=2 SV=1	serine incorporator 1 [Sus scrofa]
ONT.206.2	--	--	Cellular Component: membrane-bounded organelle (GO:0043227);; Biological Process: cellular lipid metabolic process (GO:0044255);; Cellular Component: membrane part (GO:0044425);; Cellular Component: cell part (GO:0044464);;	--	--	[S]	Function unknown	Serine incorporator (Serinc)	Serine incorporator 1 OS=Pongo abelii OX=9601 GN=SERINC1 PE=2 SV=1	serine incorporator 1 [Sus scrofa]
ONT.206.3	--	--	Cellular Component: membrane (GO:0016020);; Cellular Component: membrane-bounded organelle (GO:0043227);; Biological Process: cellular lipid metabolic process (GO:0044255);; Cellular Component: cell part (GO:0044464);;	--	--	[S]	Function unknown	Serine incorporator (Serinc);; Serine incorporator (Serinc);; Serine incorporator (Serinc)	Serine incorporator 1 OS=Pongo abelii OX=9601 GN=SERINC1 PE=2 SV=1	serine incorporator 1 isoform X1 [Loxodonta africana]
ONT.208.2	--	--	Molecular Function: RNA polymerase II core promoter sequence-specific DNA binding (GO:0000979);; Molecular Function: RNA polymerase II intronic transcription regulatory region sequence-specific DNA binding (GO:0001162);; Molecular Function: transcriptional activator activity, RNA polymerase II transcription regulatory region sequence-specific binding (GO:0001228);; Cellular Component: nucleus (GO…	K09415|0|ssc:100154234|K09415 heat shock transcription factor 2 | (RefSeq) HSF2; heat shock transcription factor 2	--	[K]	Transcription	Vertebrate heat shock transcription factor;; HSF-type DNA-binding	Heat shock factor protein 1 OS=Bos taurus OX=9913 GN=HSF1 PE=2 SV=1	PREDICTED: heat shock factor protein 2 isoform X1 [Chrysochloris asiatica]
ONT.208.3	--	--	Molecular Function: RNA polymerase II regulatory region sequence-specific DNA binding (GO:0000977);; Biological Process: regulation of transcription, DNA-templated (GO:0006355);; Biological Process: transcription from RNA polymerase II promoter (GO:0006366);;	K09415|2.21846e-18|ssc:100154234|K09415 heat shock transcription factor 2 | (RefSeq) HSF2; heat shock transcription factor 2	--	[K]	Transcription	--	--	heat shock factor protein 2 isoform X2 [Sus scrofa]
ONT.208.5	--	--	Molecular Function: RNA polymerase II regulatory region sequence-specific DNA binding (GO:0000977);; Molecular Function: transcription factor activity, sequence-specific DNA binding (GO:0003700);; Biological Process: regulation of transcription from RNA polymerase II promoter (GO:0006357);; Cellular Component: intracellular part (GO:0044424);;	K09415|3.71466e-109|gja:107107113|K09415 heat shock transcription factor 2 | (RefSeq) HSF2; heat shock transcription factor 2	--	[K]	Transcription	HSF-type DNA-binding;; Vertebrate heat shock transcription factor	Heat shock factor protein 1 OS=Bos taurus OX=9913 GN=HSF1 PE=2 SV=1	heat shock factor protein 2 isoform X6 [Felis catus]
ONT.208.6	--	--	--	--	--	--	--	--	--	--
ONT.208.7	--	--	Molecular Function: RNA polymerase II core promoter sequence-specific DNA binding (GO:0000979);; Molecular Function: RNA polymerase II intronic transcription regulatory region sequence-specific DNA binding (GO:0001162);; Molecular Function: transcriptional activator activity, RNA polymerase II transcription regulatory region sequence-specific binding (GO:0001228);; Cellular Component: nucleus (GO…	K09415|8.12363e-46|ocu:100356373|K09415 heat shock transcription factor 2 | (RefSeq) HSF2; heat shock transcription factor 2	--	[K]	Transcription	--	Heat shock factor protein 1 OS=Bos taurus OX=9913 GN=HSF1 PE=2 SV=1	PREDICTED: heat shock factor protein 2 isoform X1 [Rhinolophus sinicus]
ONT.208.8	--	--	Molecular Function: RNA polymerase II regulatory region sequence-specific DNA binding (GO:0000977);; Molecular Function: transcription factor activity, sequence-specific DNA binding (GO:0003700);; Biological Process: regulation of transcription from RNA polymerase II promoter (GO:0006357);; Cellular Component: intracellular part (GO:0044424);;	K09415|5.07925e-30|rno:64441|K09415 heat shock transcription factor 2 | (RefSeq) Hsf2; heat shock transcription factor 2	--	[K]	Transcription	HSF-type DNA-binding	Heat shock factor protein 1 OS=Bos taurus OX=9913 GN=HSF1 PE=2 SV=1	PREDICTED: heat shock factor protein 2, partial [Hipposideros armiger]
ONT.209.1	--	--	Cellular Component: plasma membrane (GO:0005886);; Cellular Component: cell-cell junction (GO:0005911);; Biological Process: cell communication (GO:0007154);; Biological Process: heart development (GO:0007507);; Biological Process: tissue development (GO:0009888);; Cellular Component: intracellular organelle (GO:0043229);; Cellular Component: cytoplasmic part (GO:0044444);; Biological Process: si…	K07372|1.84928e-71|fca:101100211|K07372 gap junction protein, alpha 1 | (RefSeq) GJA1; gap junction protein alpha 1	Gap junction (ko04540);; Arrhythmogenic right ventricular cardiomyopathy (ARVC) (ko05412)	--	--	Connexin;; Gap junction alpha-1 protein (Cx43);; Connexin	Gap junction alpha-1 protein OS=Ursus americanus OX=9643 GN=GJA1 PE=2 SV=1	connexin 43 [Chaerephon plicatus]
ONT.210.1	--	--	--	--	--	--	--	--	--	--
ONT.211.1	--	--	Cellular Component: nuclear chromatin (GO:0000790);; Biological Process: osteoblast differentiation (GO:0001649);; Molecular Function: chromatin binding (GO:0003682);; Cellular Component: nucleoplasm (GO:0005654);; Biological Process: DNA repair (GO:0006281);; Biological Process: DNA replication-dependent nucleosome assembly (GO:0006335);; Biological Process: DNA replication-independent nucleosom…	K10753|3.01419e-62|ssc:100519343|K10753 histone chaperone ASF1 | (RefSeq) ASF1A; anti-silencing function 1A histone chaperone	--	[KB]	Transcription;; Chromatin structure and dynamics	ASF1 like histone chaperone	Histone chaperone ASF1A OS=Bos taurus OX=9913 GN=ASF1A PE=2 SV=1	histone chaperone ASF1A [Sus scrofa]
ONT.211.2	--	--	Cellular Component: chromatin (GO:0000785);; Molecular Function: binding (GO:0005488);; Biological Process: nucleosome assembly (GO:0006334);; Biological Process: transcription, DNA-templated (GO:0006351);; Biological Process: cell differentiation (GO:0030154);; Cellular Component: nuclear lumen (GO:0031981);;	K10753|4.00281e-50|ssc:100519343|K10753 histone chaperone ASF1 | (RefSeq) ASF1A; anti-silencing function 1A histone chaperone	--	[KB]	Transcription;; Chromatin structure and dynamics	ASF1 like histone chaperone	Histone chaperone ASF1A OS=Bos taurus OX=9913 GN=ASF1A PE=2 SV=1	histone chaperone ASF1A [Sus scrofa]
ONT.212.1	--	--	--	--	--	--	--	--	--	--
ONT.212.2	--	--	--	--	--	--	--	Phospholamban	Cardiac phospholamban OS=Bos taurus OX=9913 GN=PLN PE=1 SV=1	--
ONT.212.3	--	--	--	--	--	--	--	--	--	--
ONT.212.4	--	--	--	K05852|3.31021e-06|bta:100125240|K05852 phospholamban | (RefSeq) PLN, PLB; phospholamban	Calcium signaling pathway (ko04020);; cGMP-PKG signaling pathway (ko04022);; cAMP signaling pathway (ko04024);; Adrenergic signaling in cardiomyocytes (ko04261);; Thyroid hormone signaling pathway (ko04919);; Dilated cardiomyopathy (ko05414)	--	--	Phospholamban	Cardiac phospholamban OS=Bos taurus OX=9913 GN=PLN PE=1 SV=1	cardiac phospholamban [Bos taurus]
ONT.212.5	--	--	--	K05852|1.06225e-07|bta:100125240|K05852 phospholamban | (RefSeq) PLN, PLB; phospholamban	Calcium signaling pathway (ko04020);; cGMP-PKG signaling pathway (ko04022);; cAMP signaling pathway (ko04024);; Adrenergic signaling in cardiomyocytes (ko04261);; Thyroid hormone signaling pathway (ko04919);; Dilated cardiomyopathy (ko05414)	--	--	Phospholamban	Cardiac phospholamban OS=Bos taurus OX=9913 GN=PLN PE=1 SV=1	cardiac phospholamban [Bos taurus]
ONT.212.6	--	--	--	K05852|7.52608e-08|bta:100125240|K05852 phospholamban | (RefSeq) PLN, PLB; phospholamban	Calcium signaling pathway (ko04020);; cGMP-PKG signaling pathway (ko04022);; cAMP signaling pathway (ko04024);; Adrenergic signaling in cardiomyocytes (ko04261);; Thyroid hormone signaling pathway (ko04919);; Dilated cardiomyopathy (ko05414)	--	--	Phospholamban	Cardiac phospholamban OS=Bos taurus OX=9913 GN=PLN PE=1 SV=1	cardiac phospholamban [Bos taurus]
ONT.212.8	--	--	--	--	--	--	--	Phospholamban	--	--
ONT.214.1	--	--	--	--	--	--	--	--	--	--
ONT.214.2	--	--	--	--	--	--	--	--	--	--
ONT.215.1	--	--	--	--	--	--	--	--	--	--
ONT.216.1	--	--	Molecular Function: frizzled binding (GO:0005109);; Cellular Component: plasma membrane (GO:0005886);; Biological Process: spermatid nucleus differentiation (GO:0007289);; Molecular Function: protein C-terminus binding (GO:0008022);; Molecular Function: GTPase regulator activity (GO:0030695);; Molecular Function: protein homodimerization activity (GO:0042803);; Cellular Component: synapse (GO:004…	--	--	[S]	Function unknown	--	Golgi-associated PDZ and coiled-coil motif-containing protein OS=Pongo abelii OX=9601 GN=GOPC PE=2 SV=1	Golgi-associated PDZ and coiled-coil motif-containing protein isoform X1 [Phascolarctos cinereus]
ONT.216.2	--	--	--	--	--	[S]	Function unknown	--	Golgi-associated PDZ and coiled-coil motif-containing protein OS=Pongo abelii OX=9601 GN=GOPC PE=2 SV=1	PREDICTED: Golgi-associated PDZ and coiled-coil motif-containing protein isoform X1 [Monodelphis domestica]
ONT.216.5	--	--	--	--	--	[S]	Function unknown	--	Golgi-associated PDZ and coiled-coil motif-containing protein OS=Pongo abelii OX=9601 GN=GOPC PE=2 SV=1	PREDICTED: golgi-associated PDZ and coiled-coil motif-containing protein isoform X1 [Lipotes vexillifer]
ONT.217.1	--	--	--	--	--	--	--	--	--	--
ONT.218.1	--	--	--	--	--	--	--	--	--	--
ONT.220.1	--	--	Molecular Function: nucleotide binding (GO:0000166);; Molecular Function: protein tyrosine kinase activity (GO:0004713);; Cellular Component: membrane (GO:0016020);; Biological Process: peptidyl-tyrosine phosphorylation (GO:0018108);; Biological Process: signal transduction by protein phosphorylation (GO:0023014);; Biological Process: cell differentiation (GO:0030154);; Cellular Component: cell p…	K05088|5.01556e-84|lve:103083859|K05088 proto-oncogene tyrosine-protein kinase ROS [EC:2.7.10.1] | (RefSeq) ROS1; ROS proto-oncogene 1, receptor tyrosine kinase	--	[T]	Signal transduction mechanisms	--	--	Proto-oncogene tyrosine-protein kinase ROS [Bos mutus]
ONT.221.1	--	--	--	--	--	--	--	--	--	--
ONT.221.2	--	--	--	--	--	--	--	--	--	--
ONT.221.3	--	--	Molecular Function: transcription coactivator activity (GO:0003713);; Cellular Component: nucleus (GO:0005634);; Cellular Component: cytoplasm (GO:0005737);; Biological Process: skeletal muscle tissue development (GO:0007519);; Molecular Function: protein C-terminus binding (GO:0008022);; Biological Process: positive regulation of transcription from RNA polymerase II promoter (GO:0045944);;	--	--	--	--	--	--	transcription cofactor vestigial-like protein 2 isoform X1 [Sus scrofa]
ONT.221.4	--	--	--	--	--	--	--	--	--	transcription cofactor vestigial-like protein 2 isoform X1 [Sus scrofa]
ONT.222.2	--	--	--	--	--	--	--	--	--	--
ONT.223.1	--	--	--	--	--	--	--	--	--	--
ONT.223.2	--	--	--	--	--	--	--	--	--	--
ONT.223.4	--	--	--	--	--	--	--	--	--	--
ONT.223.5	--	--	--	--	--	--	--	--	--	--
ONT.223.6	--	--	--	--	--	--	--	--	--	--
ONT.223.7	--	--	--	--	--	--	--	--	--	--
ONT.224.1	--	--	Cellular Component: integral component of membrane (GO:0016021);;	--	--	--	--	Protein of unknown function (DUF1075)	Protein FAM162B OS=Bos taurus OX=9913 GN=FAM162B PE=2 SV=1	PREDICTED: protein FAM162B [Chrysochloris asiatica]
ONT.224.4	--	--	--	--	--	--	--	--	Protein FAM162B OS=Bos taurus OX=9913 GN=FAM162B PE=2 SV=1	LOW QUALITY PROTEIN: protein FAM162B [Sus scrofa]
ONT.225.1	--	--	--	--	--	[S]	Function unknown	--	Zinc finger with UFM1-specific peptidase domain protein OS=Bos taurus OX=9913 GN=ZUFSP PE=2 SV=1	zinc finger with UFM1-specific peptidase domain protein [Sus scrofa]
ONT.226.1	--	--	Molecular Function: protein tyrosine phosphatase activity (GO:0004725);; Cellular Component: nucleus (GO:0005634);; Cellular Component: cytoplasm (GO:0005737);; Biological Process: protein dephosphorylation (GO:0006470);; Biological Process: positive regulation of cell migration (GO:0030335);;	K18041|2.36764e-51|ssc:100522049|K18041 protein tyrosine phosphatase type IVA [EC:3.1.3.48] | (RefSeq) PTP4A1; protein tyrosine phosphatase type IVA, member 1	--	[T]	Signal transduction mechanisms	--	Protein tyrosine phosphatase type IVA 1 OS=Macaca fascicularis OX=9541 GN=PTP4A1 PE=1 SV=1	PREDICTED: protein tyrosine phosphatase type IVA 1 [Hipposideros armiger]
ONT.226.2	--	--	Biological Process: dephosphorylation (GO:0016311);; Molecular Function: phosphatase activity (GO:0016791);;	K18041|1.57079e-29|xma:102216962|K18041 protein tyrosine phosphatase type IVA [EC:3.1.3.48] | (RefSeq) protein tyrosine phosphatase type IVA 2-like	--	[T]	Signal transduction mechanisms	--	Protein tyrosine phosphatase type IVA 1 OS=Macaca fascicularis OX=9541 GN=PTP4A1 PE=1 SV=1	protein tyrosine phosphatase 4a1 isoform 3-like protein [Camelus ferus]
ONT.226.3	[T]	Signal transduction mechanisms	Molecular Function: protein tyrosine phosphatase activity (GO:0004725);; Cellular Component: nucleus (GO:0005634);; Cellular Component: cytoplasm (GO:0005737);; Molecular Function: protein tyrosine/serine/threonine phosphatase activity (GO:0008138);; Cellular Component: cytoplasmic side of plasma membrane (GO:0009898);; Biological Process: positive regulation of cell migration (GO:0030335);; Biol…	K18041|2.57575e-100|ssc:100522049|K18041 protein tyrosine phosphatase type IVA [EC:3.1.3.48] | (RefSeq) PTP4A1; protein tyrosine phosphatase type IVA, member 1	--	[T]	Signal transduction mechanisms	Dual specificity phosphatase, catalytic domain;; Protein-tyrosine phosphatase	Protein tyrosine phosphatase type IVA 1 OS=Macaca fascicularis OX=9541 GN=PTP4A1 PE=1 SV=1	protein tyrosine phosphatase type IVA 1 [Sus scrofa]
ONT.227.1	--	--	--	--	--	--	--	--	--	--
ONT.228.1	--	--	--	--	--	--	--	--	--	--
ONT.229.1	--	--	--	--	--	--	--	--	--	--
ONT.229.2	--	--	Biological Process: negative regulation of signal transduction (GO:0009968);; Cellular Component: integral component of membrane (GO:0016021);; Cellular Component: membrane-bounded organelle (GO:0043227);; Cellular Component: intracellular organelle (GO:0043229);; Cellular Component: cytoplasmic part (GO:0044444);; Biological Process: single-organism transport (GO:0044765);;	K14617|2.30911e-176|pale:102888063|K14617 LMBR1 domain-containing protein 1 | (RefSeq) LMBRD1; LMBR1 domain containing 1	Vitamin digestion and absorption (ko04977)	--	--	--	Probable lysosomal cobalamin transporter OS=Macaca fascicularis OX=9541 GN=LMBRD1 PE=2 SV=1	PREDICTED: probable lysosomal cobalamin transporter isoform X1 [Pteropus alecto]
ONT.229.5	--	--	Biological Process: single-organism process (GO:0044699);;	K14617|2.52457e-155|acs:100566663|K14617 LMBR1 domain-containing protein 1 | (RefSeq) lmbrd1; LMBR1 domain containing 1	--	--	--	--	Probable lysosomal cobalamin transporter OS=Macaca fascicularis OX=9541 GN=LMBRD1 PE=2 SV=1	PREDICTED: probable lysosomal cobalamin transporter [Mustela putorius furo]
ONT.230.1	--	--	--	--	--	--	--	--	--	--
ONT.231.1	--	--	--	--	--	--	--	--	Protein FAM135A OS=Pongo abelii OX=9601 GN=FAM135A PE=2 SV=1	Protein FAM135A [Myotis brandtii]
ONT.233.1	[S]	Function unknown	Cellular Component: mitochondrion (GO:0005739);; Biological Process: innate immune response (GO:0045087);;	--	--	[S]	Function unknown	Protein of unknown function (DUF1674)	--	PREDICTED: succinate dehydrogenase assembly factor 4, mitochondrial [Camelus dromedarius]
ONT.233.2	--	--	Biological Process: biological regulation (GO:0065007);;	--	--	[S]	Function unknown	--	--	stromal membrane-associated protein 1 isoform X1 [Sus scrofa]
ONT.233.3	[S]	Function unknown	Cellular Component: mitochondrion (GO:0005739);; Biological Process: innate immune response (GO:0045087);;	--	--	[S]	Function unknown	--	--	PREDICTED: succinate dehydrogenase assembly factor 4, mitochondrial [Camelus ferus]
ONT.233.4	--	--	Cellular Component: mitochondrion (GO:0005739);; Biological Process: innate immune response (GO:0045087);;	--	--	[S]	Function unknown	Protein of unknown function (DUF1674)	--	PREDICTED: succinate dehydrogenase assembly factor 4, mitochondrial [Camelus ferus]
ONT.234.1	--	--	Molecular Function: GTPase activator activity (GO:0005096);; Cellular Component: cytoplasm (GO:0005737);; Molecular Function: clathrin binding (GO:0030276);; Biological Process: positive regulation of GTPase activity (GO:0043547);; Biological Process: positive regulation of erythrocyte differentiation (GO:0045648);; Biological Process: regulation of clathrin-dependent endocytosis (GO:2000369);;	K12486|9.06412e-41|pps:100994098|K12486 stromal membrane-associated protein | (RefSeq) SMAP1; small ArfGAP 1	Endocytosis (ko04144)	[T]	Signal transduction mechanisms	--	Stromal membrane-associated protein 2 OS=Bos taurus OX=9913 GN=SMAP2 PE=2 SV=1	stromal membrane-associated protein 1 isoform X1 [Trichechus manatus latirostris]
ONT.234.2	--	--	Biological Process: biological regulation (GO:0065007);;	K12486|2.74659e-77|ptg:102970629|K12486 stromal membrane-associated protein | (RefSeq) SMAP1; small ArfGAP 1	Endocytosis (ko04144)	[T]	Signal transduction mechanisms	--	Stromal membrane-associated protein 2 OS=Bos taurus OX=9913 GN=SMAP2 PE=2 SV=1	stromal membrane-associated protein 1 isoform X3 [Sus scrofa]
ONT.234.3	--	--	Molecular Function: GTPase activator activity (GO:0005096);; Cellular Component: cytoplasm (GO:0005737);; Molecular Function: clathrin binding (GO:0030276);; Biological Process: positive regulation of GTPase activity (GO:0043547);; Biological Process: positive regulation of erythrocyte differentiation (GO:0045648);; Biological Process: regulation of clathrin-dependent endocytosis (GO:2000369);;	K12486|1.7932e-39|mcc:717061|K12486 stromal membrane-associated protein | (RefSeq) SMAP1; small ArfGAP 1	Endocytosis (ko04144)	[T]	Signal transduction mechanisms	--	Stromal membrane-associated protein 2 OS=Bos taurus OX=9913 GN=SMAP2 PE=2 SV=1	PREDICTED: stromal membrane-associated protein 1 isoform X1 [Orycteropus afer afer]
ONT.236.1	--	--	--	--	--	--	--	--	--	vesicle-trafficking protein SEC22a isoform X4 [Sus scrofa]
ONT.237.1	--	--	--	--	--	--	--	--	--	--
ONT.238.1	--	--	--	--	--	--	--	--	--	--
ONT.239.1	--	--	--	--	--	--	--	--	--	--
ONT.240.1	[C]	Energy production and conversion	Biological Process: cellular process (GO:0009987);; Molecular Function: oxidoreductase activity, acting on NAD(P)H (GO:0016651);; Molecular Function: heme binding (GO:0020037);; Molecular Function: metal ion binding (GO:0046872);; Biological Process: oxidation-reduction process (GO:0055114);;	K00326|8.14783e-133|phd:102344220|K00326 cytochrome-b5 reductase [EC:1.6.2.2] | (RefSeq) cytochrome b5 reductase 4-like	Amino sugar and nucleotide sugar metabolism (ko00520)	[HC]	Coenzyme transport and metabolism;; Energy production and conversion	Oxidoreductase NAD-binding domain;; Ferric reductase NAD binding domain;; Cytochrome b5-like Heme/Steroid binding domain;; Oxidoreductase FAD-binding domain	Cytochrome b5 reductase 4 OS=Bos taurus OX=9913 GN=CYB5R4 PE=2 SV=1	PREDICTED: cytochrome b5 reductase 4-like [Pantholops hodgsonii]
ONT.240.2	--	--	--	K00326|7.28896e-108|ssc:106508876|K00326 cytochrome-b5 reductase [EC:1.6.2.2] | (RefSeq) cytochrome b5 reductase 4	Amino sugar and nucleotide sugar metabolism (ko00520)	[C]	Energy production and conversion	--	Cytochrome b5 reductase 4 OS=Bos taurus OX=9913 GN=CYB5R4 PE=2 SV=1	cytochrome b5 reductase 4 isoform X1 [Sus scrofa]
ONT.240.3	[CI]	Energy production and conversion;; Lipid transport and metabolism	Molecular Function: cytochrome-b5 reductase activity, acting on NAD(P)H (GO:0004128);; Cellular Component: endoplasmic reticulum (GO:0005783);; Biological Process: generation of precursor metabolites and energy (GO:0006091);; Biological Process: superoxide metabolic process (GO:0006801);; Molecular Function: NAD(P)H oxidase activity (GO:0016174);; Molecular Function: heme binding (GO:0020037);; B…	K00326|1.3357e-88|ssc:100622980|K00326 cytochrome-b5 reductase [EC:1.6.2.2] | (RefSeq) cytochrome b5 reductase 4-like	Amino sugar and nucleotide sugar metabolism (ko00520)	[C]	Energy production and conversion	Cytochrome b5-like Heme/Steroid binding domain	Cytochrome b5 reductase 4 OS=Bos taurus OX=9913 GN=CYB5R4 PE=2 SV=1	cytochrome b5 reductase 4 isoform X1 [Sus scrofa]
ONT.240.5	--	--	Biological Process: cellular process (GO:0009987);; Molecular Function: oxidoreductase activity (GO:0016491);;	K00326|1.78394e-140|ssc:106508876|K00326 cytochrome-b5 reductase [EC:1.6.2.2] | (RefSeq) cytochrome b5 reductase 4	Amino sugar and nucleotide sugar metabolism (ko00520)	[HC]	Coenzyme transport and metabolism;; Energy production and conversion	Oxidoreductase NAD-binding domain;; Oxidoreductase FAD-binding domain	Cytochrome b5 reductase 4 OS=Bos taurus OX=9913 GN=CYB5R4 PE=2 SV=1	cytochrome b5 reductase 4 isoform X1 [Sus scrofa]
ONT.242.1	[FV]	Nucleotide transport and metabolism;; Defense mechanisms	Cellular Component: membrane (GO:0016020);; Biological Process: cellular metabolic process (GO:0044237);; Biological Process: single-organism process (GO:0044699);;	K19970|4.58272e-114|ssc:100157995|K19970 5'-nucleotidase [EC:3.1.3.5] | (RefSeq) NT5E; 5'-nucleotidase ecto	Purine metabolism (ko00230);; Pyrimidine metabolism (ko00240);; Nicotinate and nicotinamide metabolism (ko00760)	[F]	Nucleotide transport and metabolism	Calcineurin-like phosphoesterase;; 5'-nucleotidase, C-terminal domain	5&apos;-nucleotidase OS=Bos taurus OX=9913 GN=NT5E PE=1 SV=2	5&apos;-nucleotidase [Sus scrofa]
ONT.243.1	--	--	--	--	--	--	--	--	--	--
ONT.245.1	--	--	--	K17926|0|fca:101087995|K17926 sorting nexin-14 | (RefSeq) SNX14; sorting nexin 14	--	[ZUD]	Cytoskeleton;; Intracellular trafficking, secretion, and vesicular transport;; Cell cycle control, cell division, chromosome partitioning	--	Sorting nexin-14 OS=Pongo abelii OX=9601 GN=SNX14 PE=2 SV=1	sorting nexin-14 isoform X6 [Trichechus manatus latirostris]
ONT.245.4	--	--	--	K17926|0|pss:102459894|K17926 sorting nexin-14 | (RefSeq) SNX14; sorting nexin 14	--	[ZUD]	Cytoskeleton;; Intracellular trafficking, secretion, and vesicular transport;; Cell cycle control, cell division, chromosome partitioning	PXA domain;; Regulator of G protein signaling domain;; PX domain;; Sorting nexin C terminal;; PXA domain	Sorting nexin-14 OS=Pongo abelii OX=9601 GN=SNX14 PE=2 SV=1	PREDICTED: sorting nexin-14 isoform X2 [Vicugna pacos]
ONT.247.1	--	--	Molecular Function: nucleic acid binding (GO:0003676);; Biological Process: cellular process (GO:0009987);; Cellular Component: intracellular ribonucleoprotein complex (GO:0030529);;	K13160|4.28856e-154|ecb:100070472|K13160 heterogeneous nuclear ribonucleoprotein Q | (RefSeq) SYNCRIP; synaptotagmin binding cytoplasmic RNA interacting protein	--	[A]	RNA processing and modification	RNA recognition motif. (a.k.a. RRM, RBD, or RNP domain)	RNA-binding protein 47 OS=Pongo abelii OX=9601 GN=RBM47 PE=2 SV=2	SYNCRIP protein, partial [Bos taurus]
ONT.247.2	--	--	Molecular Function: nucleotide binding (GO:0000166);; Biological Process: osteoblast differentiation (GO:0001649);; Molecular Function: poly(A) binding (GO:0008143);; Cellular Component: membrane (GO:0016020);; Biological Process: negative regulation of translation (GO:0017148);; Molecular Function: RNA binding (GO:0044822);; Biological Process: CRD-mediated mRNA stabilization (GO:0070934);; Cell…	K13160|5.14183e-140|umr:103657449|K13160 heterogeneous nuclear ribonucleoprotein Q | (RefSeq) SYNCRIP; synaptotagmin binding cytoplasmic RNA interacting protein	--	[A]	RNA processing and modification	RNA recognition motif. (a.k.a. RRM, RBD, or RNP domain);; RNA recognition motif. (a.k.a. RRM, RBD, or RNP domain)	Probable RNA-binding protein 46 OS=Macaca fascicularis OX=9541 GN=RBM46 PE=2 SV=2	LOW QUALITY PROTEIN: heterogeneous nuclear ribonucleoprotein Q [Dasypus novemcinctus]
ONT.247.4	--	--	Cellular Component: macromolecular complex (GO:0032991);; Cellular Component: intracellular part (GO:0044424);;	K13160|1.21712e-80|ecb:100070472|K13160 heterogeneous nuclear ribonucleoprotein Q | (RefSeq) SYNCRIP; synaptotagmin binding cytoplasmic RNA interacting protein	--	[A]	RNA processing and modification	RNA recognition motif. (a.k.a. RRM, RBD, or RNP domain)	RNA-binding protein 47 OS=Pongo abelii OX=9601 GN=RBM47 PE=2 SV=2	SYNCRIP protein, partial [Bos taurus]
ONT.247.6	--	--	--	--	--	--	--	--	--	--
ONT.247.8	--	--	Molecular Function: RNA binding (GO:0003723);; Cellular Component: cytoplasm (GO:0005737);; Biological Process: cellular process (GO:0009987);; Biological Process: posttranscriptional regulation of gene expression (GO:0010608);; Cellular Component: intracellular ribonucleoprotein complex (GO:0030529);; Cellular Component: protein complex (GO:0043234);; Cellular Component: nuclear part (GO:0044428…	K13160|4.41845e-130|pps:100984351|K13160 heterogeneous nuclear ribonucleoprotein Q | (RefSeq) SYNCRIP; synaptotagmin binding cytoplasmic RNA interacting protein	--	[A]	RNA processing and modification	RNA recognition motif. (a.k.a. RRM, RBD, or RNP domain)	APOBEC1 complementation factor OS=Pongo abelii OX=9601 GN=A1CF PE=2 SV=1	heterogeneous nuclear ribonucleoprotein Q isoform X6 [Myotis lucifugus]
ONT.247.9	[J]	Translation, ribosomal structure and biogenesis	Molecular Function: nucleic acid binding (GO:0003676);; Biological Process: cellular process (GO:0009987);; Cellular Component: intracellular ribonucleoprotein complex (GO:0030529);;	K13160|1.13024e-146|hgl:101707165|K13160 heterogeneous nuclear ribonucleoprotein Q | (RefSeq) Syncrip; synaptotagmin binding cytoplasmic RNA interacting protein	--	[A]	RNA processing and modification	RNA recognition motif. (a.k.a. RRM, RBD, or RNP domain);; RNA recognition motif. (a.k.a. RRM, RBD, or RNP domain)	Probable RNA-binding protein 46 OS=Macaca fascicularis OX=9541 GN=RBM46 PE=2 SV=2	SYNCRIP protein, partial [Bos taurus]
ONT.247.11	--	--	Molecular Function: nucleic acid binding (GO:0003676);; Biological Process: cellular process (GO:0009987);; Cellular Component: intracellular ribonucleoprotein complex (GO:0030529);;	K13160|1.31983e-92|pps:100984351|K13160 heterogeneous nuclear ribonucleoprotein Q | (RefSeq) SYNCRIP; synaptotagmin binding cytoplasmic RNA interacting protein	--	[A]	RNA processing and modification	RNA recognition motif. (a.k.a. RRM, RBD, or RNP domain)	Probable RNA-binding protein 46 OS=Macaca fascicularis OX=9541 GN=RBM46 PE=2 SV=2	SYNCRIP protein, partial [Bos taurus]
ONT.247.12	--	--	Molecular Function: nucleotide binding (GO:0000166);; Biological Process: osteoblast differentiation (GO:0001649);; Molecular Function: poly(A) binding (GO:0008143);; Cellular Component: membrane (GO:0016020);; Biological Process: negative regulation of translation (GO:0017148);; Molecular Function: RNA binding (GO:0044822);; Biological Process: CRD-mediated mRNA stabilization (GO:0070934);; Cell…	--	--	[A]	RNA processing and modification	RNA recognition motif. (a.k.a. RRM, RBD, or RNP domain)	APOBEC1 complementation factor OS=Pongo abelii OX=9601 GN=A1CF PE=2 SV=1	SYNCRIP protein, partial [Bos taurus]
ONT.248.1	--	--	--	--	--	--	--	--	--	--
ONT.248.2	--	--	--	--	--	--	--	--	--	--
ONT.248.3	--	--	--	--	--	--	--	--	--	--
ONT.248.4	--	--	--	--	--	--	--	--	--	--
ONT.248.7	--	--	--	--	--	--	--	--	--	--
ONT.248.8	--	--	--	--	--	--	--	--	--	--
ONT.248.10	--	--	--	--	--	--	--	--	--	--
ONT.248.16	--	--	--	--	--	--	--	--	--	--
ONT.248.18	--	--	--	--	--	--	--	--	--	--
ONT.248.20	--	--	--	--	--	--	--	--	--	--
ONT.248.23	--	--	--	--	--	--	--	--	--	--
ONT.248.24	--	--	--	--	--	--	--	--	--	--
ONT.248.25	--	--	--	--	--	--	--	--	--	--
ONT.248.29	--	--	--	--	--	--	--	--	--	--
ONT.249.2	--	--	--	--	--	[R]	General function prediction only	--	--	zinc finger protein 292 isoform X1 [Sus scrofa]
ONT.250.1	--	--	Cellular Component: integral component of membrane (GO:0016021);;	--	--	--	--	Domain of unknown function (DUF4500)	Small integral membrane protein 8 OS=Bos taurus OX=9913 GN=SMIM8 PE=3 SV=1	PREDICTED: small integral membrane protein 8 [Tursiops truncatus]
ONT.250.2	--	--	Cellular Component: integral component of membrane (GO:0016021);;	--	--	--	--	--	Small integral membrane protein 8 OS=Bos taurus OX=9913 GN=SMIM8 PE=3 SV=1	PREDICTED: small integral membrane protein 8 [Ceratotherium simum simum]
ONT.250.3	--	--	Cellular Component: integral component of membrane (GO:0016021);;	--	--	--	--	--	Small integral membrane protein 8 OS=Pongo abelii OX=9601 GN=SMIM8 PE=3 SV=1	small integral membrane protein 8 [Sus scrofa]
ONT.250.4	--	--	--	--	--	--	--	Domain of unknown function (DUF4500)	Small integral membrane protein 8 OS=Pongo abelii OX=9601 GN=SMIM8 PE=3 SV=1	PREDICTED: small integral membrane protein 8 [Manis javanica]
ONT.250.8	--	--	Cellular Component: integral component of membrane (GO:0016021);;	--	--	--	--	Domain of unknown function (DUF4500)	Small integral membrane protein 8 OS=Bos taurus OX=9913 GN=SMIM8 PE=3 SV=1	PREDICTED: small integral membrane protein 8 [Tursiops truncatus]
ONT.250.9	--	--	Cellular Component: integral component of membrane (GO:0016021);;	--	--	--	--	Domain of unknown function (DUF4500)	Small integral membrane protein 8 OS=Pongo abelii OX=9601 GN=SMIM8 PE=3 SV=1	small integral membrane protein 8 [Loxodonta africana]
ONT.250.10	--	--	Cellular Component: integral component of membrane (GO:0016021);;	--	--	--	--	--	Small integral membrane protein 8 OS=Pongo abelii OX=9601 GN=SMIM8 PE=3 SV=1	small integral membrane protein 8 isoform X2 [Pteropus vampyrus]
ONT.250.12	--	--	Cellular Component: integral component of membrane (GO:0016021);;	--	--	--	--	--	Small integral membrane protein 8 OS=Pongo abelii OX=9601 GN=SMIM8 PE=3 SV=1	UPF0708 protein like protein [Myotis brandtii]
ONT.252.1	[J]	Translation, ribosomal structure and biogenesis	Molecular Function: nucleotide binding (GO:0000166);; Molecular Function: arginine-tRNA ligase activity (GO:0004814);; Cellular Component: mitochondrion (GO:0005739);; Biological Process: arginyl-tRNA aminoacylation (GO:0006420);; Biological Process: mitochondrial translation (GO:0032543);;	K01887|0|bta:525894|K01887 arginyl-tRNA synthetase [EC:6.1.1.19] | (RefSeq) RARS2; arginyl-tRNA synthetase 2, mitochondrial	Aminoacyl-tRNA biosynthesis (ko00970)	[J]	Translation, ribosomal structure and biogenesis	tRNA synthetases class I (R);; tRNA synthetases class I (R);; tRNA synthetases class I (R)	Probable arginine--tRNA ligase, mitochondrial OS=Bos taurus OX=9913 GN=RARS2 PE=2 SV=1	probable arginine--tRNA ligase, mitochondrial isoform X3 [Sus scrofa]
ONT.253.2	--	--	Cellular Component: nucleus (GO:0005634);; Biological Process: transcription, DNA-templated (GO:0006351);; Cellular Component: transcriptional repressor complex (GO:0017053);; Biological Process: single-multicellular organism process (GO:0044707);; Biological Process: regulation of biological process (GO:0050789);;	--	--	[S]	Function unknown	--	Akirin-2 OS=Bos taurus OX=9913 GN=AKIRIN2 PE=2 SV=1	PREDICTED: akirin-2, partial [Vicugna pacos]
ONT.254.1	--	--	--	--	--	--	--	--	--	--
ONT.255.1	--	--	--	--	--	--	--	--	--	PREDICTED: diablo homolog, mitochondrial isoform X2 [Capra hircus]
ONT.256.1	--	--	--	--	--	--	--	--	--	--
ONT.257.1	--	--	--	--	--	--	--	--	--	--
ONT.258.1	--	--	--	--	--	--	--	--	--	CREB-regulated transcription coactivator 2 isoform X3 [Sus scrofa]
ONT.259.1	--	--	--	--	--	--	--	--	--	--
ONT.260.1	--	--	--	--	--	--	--	--	--	--
ONT.261.2	--	--	Molecular Function: structural constituent of ribosome (GO:0003735);; Cellular Component: ribosome (GO:0005840);; Biological Process: translation (GO:0006412);;	K02875|2.34031e-20|cmy:102929639|K02875 large subunit ribosomal protein L14e | (RefSeq) 60S ribosomal protein L14-like	Ribosome (ko03010)	[J]	Translation, ribosomal structure and biogenesis	Ribosomal protein L14;; Ribosomal protein L14	60S ribosomal protein L14 OS=Sus scrofa OX=9823 GN=RPL14 PE=1 SV=1	uncharacterized protein C1orf141 homolog isoform X3 [Phascolarctos cinereus]
ONT.264.1	--	--	--	--	--	--	--	--	--	--
ONT.265.1	--	--	--	K18774|1.44612e-35|umr:103659875|K18774 proline-rich nuclear receptor coactivator 1 | (RefSeq) PNRC1; proline rich nuclear receptor coactivator 1	--	--	--	--	--	PREDICTED: proline-rich nuclear receptor coactivator 1 [Camelus bactrianus]
ONT.265.3	--	--	--	K18774|1.66286e-31|ptg:102967375|K18774 proline-rich nuclear receptor coactivator 1 | (RefSeq) PNRC1; proline rich nuclear receptor coactivator 1	--	--	--	--	--	PREDICTED: proline-rich nuclear receptor coactivator 1 [Miniopterus natalensis]
ONT.265.4	--	--	--	K18774|1.77207e-30|fca:101097397|K18774 proline-rich nuclear receptor coactivator 1 | (RefSeq) PNRC1; proline rich nuclear receptor coactivator 1	--	--	--	--	--	proline-rich nuclear receptor coactivator 1 [Sus scrofa]
ONT.265.5	--	--	--	K18774|1.61933e-77|chx:102177063|K18774 proline-rich nuclear receptor coactivator 1 | (RefSeq) PNRC1; proline rich nuclear receptor coactivator 1	--	--	--	Proline-rich nuclear receptor coactivator motif	--	PREDICTED: proline-rich nuclear receptor coactivator 1 [Capra hircus]
ONT.265.6	--	--	--	K18774|3.37021e-100|aml:100483943|K18774 proline-rich nuclear receptor coactivator 1 | (RefSeq) PNRC1; proline rich nuclear receptor coactivator 1	--	--	--	Proline-rich nuclear receptor coactivator motif	--	PREDICTED: proline-rich nuclear receptor coactivator 1 [Tursiops truncatus]
ONT.265.8	--	--	--	K18774|1.23036e-20|ssc:106508885|K18774 proline-rich nuclear receptor coactivator 1 | (RefSeq) PNRC1; proline rich nuclear receptor coactivator 1	--	--	--	--	--	PREDICTED: proline-rich nuclear receptor coactivator 1-like, partial [Camelus dromedarius]
ONT.265.9	--	--	--	K18774|2.19552e-39|fca:101097397|K18774 proline-rich nuclear receptor coactivator 1 | (RefSeq) PNRC1; proline rich nuclear receptor coactivator 1	--	--	--	--	--	PREDICTED: proline-rich nuclear receptor coactivator 1 [Panthera pardus]
ONT.265.10	--	--	--	K18774|1.28623e-38|tup:102493842|K18774 proline-rich nuclear receptor coactivator 1 | (RefSeq) PNRC1; proline rich nuclear receptor coactivator 1	--	--	--	--	--	proline-rich nuclear receptor coactivator 1 [Equus caballus]
ONT.265.11	--	--	--	K18774|9.19201e-24|ptg:102967375|K18774 proline-rich nuclear receptor coactivator 1 | (RefSeq) PNRC1; proline rich nuclear receptor coactivator 1	--	--	--	--	--	PREDICTED: proline-rich nuclear receptor coactivator 1, partial [Panthera tigris altaica]
ONT.265.13	--	--	--	K18774|9.85776e-49|cfr:102504904|K18774 proline-rich nuclear receptor coactivator 1 | (RefSeq) PNRC1; proline rich nuclear receptor coactivator 1	--	--	--	--	--	proline-rich nuclear receptor coactivator 1 [Sus scrofa]
ONT.267.1	--	--	--	--	--	--	--	--	--	--
ONT.268.1	--	--	--	--	--	--	--	--	--	--
ONT.269.1	--	--	--	--	--	--	--	--	--	lysosome-associated membrane glycoprotein 3 isoform X1 [Sus scrofa]
ONT.270.2	--	--	--	--	--	--	--	--	--	--
ONT.271.1	--	--	Biological Process: cellular protein metabolic process (GO:0044267);; Biological Process: single-organism metabolic process (GO:0044710);; Biological Process: single-organism cellular process (GO:0044763);;	K10578|6.90784e-64|oas:101110601|K10578 ubiquitin-conjugating enzyme E2 J1 [EC:2.3.2.23] | (RefSeq) UBE2J1; ubiquitin conjugating enzyme E2 J1	Ubiquitin mediated proteolysis (ko04120);; Protein processing in endoplasmic reticulum (ko04141);; Parkinson's disease (ko05012)	[O]	Posttranslational modification, protein turnover, chaperones	--	Ubiquitin-conjugating enzyme E2 J2 OS=Bos taurus OX=9913 GN=UBE2J2 PE=2 SV=1	PREDICTED: ubiquitin-conjugating enzyme E2 J1 isoform X2 [Ovis aries]
ONT.273.1	--	--	Cellular Component: vacuole (GO:0005773);; Biological Process: cell communication (GO:0007154);; Cellular Component: protein complex (GO:0043234);; Biological Process: regulation of cellular process (GO:0050794);; Biological Process: cellular response to stimulus (GO:0051716);;	K16186|4.57763e-68|dmo:Dmoj_GI20265|K16186 Ras-related GTP-binding protein C/D | (RefSeq) GI20265 gene product from transcript GI20265-RB	mTOR signaling pathway (ko04150)	[U]	Intracellular trafficking, secretion, and vesicular transport	Gtr1/RagA G protein conserved region;; Gtr1/RagA G protein conserved region	--	PREDICTED: ras-related GTP-binding protein D [Miniopterus natalensis]
ONT.273.5	--	--	Cellular Component: cytoplasm (GO:0005737);; Cellular Component: intracellular membrane-bounded organelle (GO:0043231);; Biological Process: cellular response to stimulus (GO:0051716);;	K16186|2.72194e-74|oas:101114114|K16186 Ras-related GTP-binding protein C/D | (RefSeq) RRAGD; Ras related GTP binding D	mTOR signaling pathway (ko04150)	[U]	Intracellular trafficking, secretion, and vesicular transport	--	--	PREDICTED: ras-related GTP-binding protein D isoform X3 [Panthera pardus]
ONT.273.9	--	--	Molecular Function: GTPase activity (GO:0003924);; Molecular Function: GTP binding (GO:0005525);; Cellular Component: nucleus (GO:0005634);; Cellular Component: lysosome (GO:0005764);; Biological Process: cellular response to starvation (GO:0009267);; Biological Process: regulation of autophagy (GO:0010506);; Biological Process: positive regulation of TOR signaling (GO:0032008);; Cellular Compone…	K16186|0|phd:102335594|K16186 Ras-related GTP-binding protein C/D | (RefSeq) RRAGD; Ras related GTP binding D	mTOR signaling pathway (ko04150)	[U]	Intracellular trafficking, secretion, and vesicular transport	Gtr1/RagA G protein conserved region;; Gtr1/RagA G protein conserved region	--	PREDICTED: ras-related GTP-binding protein D [Pantholops hodgsonii]
ONT.274.1	--	--	--	--	--	--	--	--	LYR motif-containing protein 2 OS=Bos taurus OX=9913 GN=LYRM2 PE=3 SV=1	LYR motif-containing protein 2 [Sus scrofa]
ONT.274.4	--	--	Cellular Component: mitochondrion (GO:0005739);;	--	--	--	--	Complex 1 protein (LYR family);; Complex1_LYR-like	LYR motif-containing protein 2 OS=Bos taurus OX=9913 GN=LYRM2 PE=3 SV=1	LYR motif-containing protein 2 [Sus scrofa]
ONT.274.7	--	--	--	--	--	--	--	Complex 1 protein (LYR family)	LYR motif-containing protein 2 OS=Bos taurus OX=9913 GN=LYRM2 PE=3 SV=1	PREDICTED: LYR motif-containing protein 2 [Eptesicus fuscus]
ONT.274.8	--	--	--	--	--	--	--	--	LYR motif-containing protein 2 OS=Bos taurus OX=9913 GN=LYRM2 PE=3 SV=1	LYR motif-containing protein 2 [Sus scrofa]
ONT.274.9	--	--	Cellular Component: mitochondrion (GO:0005739);;	--	--	--	--	Complex 1 protein (LYR family)	LYR motif-containing protein 2 OS=Bos taurus OX=9913 GN=LYRM2 PE=3 SV=1	PREDICTED: LYR motif-containing protein 2 [Hipposideros armiger]
ONT.275.1	--	--	--	--	--	--	--	--	--	--
ONT.276.1	--	--	--	--	--	--	--	--	--	--
ONT.276.2	--	--	--	--	--	--	--	--	--	--
ONT.278.1	--	--	Molecular Function: catalytic activity (GO:0003824);; Cellular Component: endoplasmic reticulum (GO:0005783);; Biological Process: response to endogenous stimulus (GO:0009719);; Biological Process: response to organic substance (GO:0010033);; Biological Process: regulation of gene expression (GO:0010468);; Biological Process: regulation of cellular protein metabolic process (GO:0032268);; Biologi…	--	--	[S]	Function unknown	E3 UFM1-protein ligase 1	E3 UFM1-protein ligase 1 OS=Macaca fascicularis OX=9541 GN=UFL1 PE=2 SV=1	E3 UFM1-protein ligase 1 [Sus scrofa]
ONT.278.2	--	--	Biological Process: cellular protein metabolic process (GO:0044267);; Cellular Component: intracellular part (GO:0044424);; Biological Process: single-organism process (GO:0044699);; Biological Process: regulation of cellular process (GO:0050794);; Biological Process: regulation of macromolecule metabolic process (GO:0060255);;	--	--	[S]	Function unknown	E3 UFM1-protein ligase 1	E3 UFM1-protein ligase 1 OS=Macaca fascicularis OX=9541 GN=UFL1 PE=2 SV=1	PREDICTED: E3 UFM1-protein ligase 1 isoform X1 [Bubalus bubalis]
ONT.278.3	--	--	Biological Process: osteoblast differentiation (GO:0001649);; Cellular Component: nucleus (GO:0005634);; Cellular Component: endoplasmic reticulum membrane (GO:0005789);; Cellular Component: cytosol (GO:0005829);; Molecular Function: ligase activity (GO:0016874);; Biological Process: negative regulation of protein ubiquitination (GO:0031397);; Biological Process: negative regulation of NF-kappaB …	--	--	[S]	Function unknown	E3 UFM1-protein ligase 1;; E3 UFM1-protein ligase 1	E3 UFM1-protein ligase 1 OS=Bos taurus OX=9913 GN=UFL1 PE=2 SV=1	E3 UFM1-protein ligase 1 [Sus scrofa]
ONT.278.4	--	--	Biological Process: cellular protein metabolic process (GO:0044267);; Cellular Component: intracellular part (GO:0044424);; Biological Process: single-organism process (GO:0044699);; Biological Process: regulation of cellular process (GO:0050794);; Biological Process: regulation of macromolecule metabolic process (GO:0060255);;	--	--	[S]	Function unknown	E3 UFM1-protein ligase 1	E3 UFM1-protein ligase 1 OS=Bos taurus OX=9913 GN=UFL1 PE=2 SV=1	E3 UFM1-protein ligase 1 [Sus scrofa]
ONT.279.1	--	--	Molecular Function: transcription coactivator activity (GO:0003713);; Molecular Function: zinc ion binding (GO:0008270);; Biological Process: positive regulation of transcription from RNA polymerase II promoter (GO:0045944);;	--	--	[TZR]	Signal transduction mechanisms;; Cytoskeleton;; General function prediction only	LIM domain	Four and a half LIM domains protein 5 OS=Macaca fascicularis OX=9541 GN=FHL5 PE=2 SV=1	PREDICTED: four and a half LIM domains protein 5 [Tupaia chinensis]
ONT.279.2	--	--	--	--	--	[TZR]	Signal transduction mechanisms;; Cytoskeleton;; General function prediction only	LIM domain	Four and a half LIM domains protein 5 OS=Bos taurus OX=9913 GN=FHL5 PE=2 SV=1	four and a half LIM domains protein 5 [Sus scrofa]
ONT.281.1	--	--	--	K18161|4.16646e-10|ssc:100157673|K18161 NADH dehydrogenase [ubiquinone] 1 alpha subcomplex assembly factor 4 | (RefSeq) NDUFAF4; NADH:ubiquinone oxidoreductase complex assembly factor 4	--	--	--	--	NADH dehydrogenase [ubiquinone] 1 alpha subcomplex assembly factor 4 OS=Bos taurus OX=9913 GN=NDUFAF4 PE=2 SV=1	NADH dehydrogenase [ubiquinone] 1 alpha subcomplex assembly factor 4 [Sus scrofa]
ONT.281.2	--	--	Cellular Component: mitochondrion (GO:0005739);; Biological Process: NADH dehydrogenase complex assembly (GO:0010257);;	K18161|1.09548e-14|aml:100481532|K18161 NADH dehydrogenase [ubiquinone] 1 alpha subcomplex assembly factor 4 | (RefSeq) NDUFAF4; NADH:ubiquinone oxidoreductase complex assembly factor 4	--	[S]	Function unknown	--	NADH dehydrogenase [ubiquinone] 1 alpha subcomplex assembly factor 4 OS=Bos taurus OX=9913 GN=NDUFAF4 PE=2 SV=1	PREDICTED: NADH dehydrogenase [ubiquinone] 1 alpha subcomplex assembly factor 4 [Odobenus rosmarus divergens]
ONT.281.3	--	--	Molecular Function: calmodulin binding (GO:0005516);; Cellular Component: mitochondrial membrane (GO:0031966);; Biological Process: mitochondrial respiratory chain complex I assembly (GO:0032981);;	K18161|2.14746e-15|ssc:100157673|K18161 NADH dehydrogenase [ubiquinone] 1 alpha subcomplex assembly factor 4 | (RefSeq) NDUFAF4; NADH:ubiquinone oxidoreductase complex assembly factor 4	--	[S]	Function unknown	--	NADH dehydrogenase [ubiquinone] 1 alpha subcomplex assembly factor 4 OS=Bos taurus OX=9913 GN=NDUFAF4 PE=2 SV=1	PREDICTED: NADH dehydrogenase [ubiquinone] 1 alpha subcomplex assembly factor 4 [Odobenus rosmarus divergens]
ONT.281.4	--	--	--	K18161|2.43771e-54|ssc:100157673|K18161 NADH dehydrogenase [ubiquinone] 1 alpha subcomplex assembly factor 4 | (RefSeq) NDUFAF4; NADH:ubiquinone oxidoreductase complex assembly factor 4	--	[S]	Function unknown	--	NADH dehydrogenase [ubiquinone] 1 alpha subcomplex assembly factor 4 OS=Bos taurus OX=9913 GN=NDUFAF4 PE=2 SV=1	NADH dehydrogenase [ubiquinone] 1 alpha subcomplex assembly factor 4 [Sus scrofa]
ONT.281.5	--	--	Cellular Component: mitochondrial membrane (GO:0031966);; Biological Process: mitochondrial respiratory chain complex I assembly (GO:0032981);;	K18161|7.95656e-76|ssc:100157673|K18161 NADH dehydrogenase [ubiquinone] 1 alpha subcomplex assembly factor 4 | (RefSeq) NDUFAF4; NADH:ubiquinone oxidoreductase complex assembly factor 4	--	[S]	Function unknown	Uncharacterised protein family (UPF0240);; Uncharacterised protein family (UPF0240)	NADH dehydrogenase [ubiquinone] 1 alpha subcomplex assembly factor 4 OS=Bos taurus OX=9913 GN=NDUFAF4 PE=2 SV=1	NADH dehydrogenase [ubiquinone] 1 alpha subcomplex assembly factor 4 [Sus scrofa]
ONT.281.6	--	--	--	K18161|1.70119e-57|ssc:100157673|K18161 NADH dehydrogenase [ubiquinone] 1 alpha subcomplex assembly factor 4 | (RefSeq) NDUFAF4; NADH:ubiquinone oxidoreductase complex assembly factor 4	--	[S]	Function unknown	Uncharacterised protein family (UPF0240)	NADH dehydrogenase [ubiquinone] 1 alpha subcomplex assembly factor 4 OS=Bos taurus OX=9913 GN=NDUFAF4 PE=2 SV=1	NADH dehydrogenase [ubiquinone] 1 alpha subcomplex assembly factor 4 [Sus scrofa]
ONT.282.2	--	--	Cellular Component: nucleoplasm (GO:0005654);; Cellular Component: mitochondrial intermembrane space (GO:0005758);;	K10270|0|ssc:100156082|K10270 F-box and leucine-rich repeat protein 4 | (RefSeq) FBXL4; F-box and leucine rich repeat protein 4	--	[R]	General function prediction only	Leucine Rich repeats (2 copies);; F-box domain;; F-box-like	F-box/LRR-repeat protein 4 OS=Bos taurus OX=9913 GN=FBXL4 PE=2 SV=1	F-box/LRR-repeat protein 4 [Sus scrofa]
ONT.283.1	--	--	--	--	--	--	--	--	--	--
ONT.284.1	--	--	--	--	--	--	--	--	--	--
ONT.285.2	[H]	Coenzyme transport and metabolism	--	K00591|1.99824e-51|umr:103675878|K00591 polyprenyldihydroxybenzoate methyltransferase / 3-demethylubiquinol 3-O-methyltransferase [EC:2.1.1.114 2.1.1.64] | (RefSeq) COQ3; coenzyme Q3, methyltransferase	Ubiquinone and other terpenoid-quinone biosynthesis (ko00130)	[H]	Coenzyme transport and metabolism	--	Ubiquinone biosynthesis O-methyltransferase, mitochondrial OS=Bos taurus OX=9913 GN=COQ3 PE=2 SV=1	PREDICTED: LOW QUALITY PROTEIN: ubiquinone biosynthesis O-methyltransferase, mitochondrial [Bos indicus]
ONT.285.3	[H]	Coenzyme transport and metabolism	Cellular Component: mitochondrion (GO:0005739);; Biological Process: glycerol metabolic process (GO:0006071);; Biological Process: ubiquinone biosynthetic process (GO:0006744);; Molecular Function: O-methyltransferase activity (GO:0008171);; Molecular Function: 2-polyprenyl-6-methoxy-1,4-benzoquinone methyltransferase activity (GO:0008425);; Biological Process: methylation (GO:0032259);;	K00591|9.8232e-106|ssc:100152047|K00591 polyprenyldihydroxybenzoate methyltransferase / 3-demethylubiquinol 3-O-methyltransferase [EC:2.1.1.114 2.1.1.64] | (RefSeq) ubiquinone biosynthesis O-methyltransferase, mitochondrial	Ubiquinone and other terpenoid-quinone biosynthesis (ko00130)	[H]	Coenzyme transport and metabolism	--	Ubiquinone biosynthesis O-methyltransferase, mitochondrial OS=Bos taurus OX=9913 GN=COQ3 PE=2 SV=1	ubiquinone biosynthesis O-methyltransferase, mitochondrial [Enhydra lutris kenyoni]
ONT.285.4	[H]	Coenzyme transport and metabolism	Cellular Component: cytoplasm (GO:0005737);; Molecular Function: S-adenosylmethionine-dependent methyltransferase activity (GO:0008757);;	K00591|5.01361e-72|ssc:100152047|K00591 polyprenyldihydroxybenzoate methyltransferase / 3-demethylubiquinol 3-O-methyltransferase [EC:2.1.1.114 2.1.1.64] | (RefSeq) ubiquinone biosynthesis O-methyltransferase, mitochondrial	Ubiquinone and other terpenoid-quinone biosynthesis (ko00130)	[H]	Coenzyme transport and metabolism	--	Ubiquinone biosynthesis O-methyltransferase, mitochondrial OS=Bos taurus OX=9913 GN=COQ3 PE=2 SV=1	ubiquinone biosynthesis O-methyltransferase, mitochondrial isoform X1 [Sus scrofa]
ONT.285.5	[H]	Coenzyme transport and metabolism	Cellular Component: mitochondrion (GO:0005739);; Molecular Function: O-methyltransferase activity (GO:0008171);; Molecular Function: S-adenosylmethionine-dependent methyltransferase activity (GO:0008757);; Cellular Component: membrane (GO:0016020);; Biological Process: methylation (GO:0032259);;	K00591|2.09729e-80|ptg:102957897|K00591 polyprenyldihydroxybenzoate methyltransferase / 3-demethylubiquinol 3-O-methyltransferase [EC:2.1.1.114 2.1.1.64] | (RefSeq) COQ3; coenzyme Q3, methyltransferase	Ubiquinone and other terpenoid-quinone biosynthesis (ko00130)	[H]	Coenzyme transport and metabolism	Methyltransferase domain;; Methyltransferase domain;; Mycolic acid cyclopropane synthetase	Ubiquinone biosynthesis O-methyltransferase, mitochondrial OS=Bos taurus OX=9913 GN=COQ3 PE=2 SV=1	ubiquinone biosynthesis O-methyltransferase, mitochondrial isoform X2 [Dasypus novemcinctus]
ONT.285.6	[H]	Coenzyme transport and metabolism	Cellular Component: mitochondrion (GO:0005739);; Molecular Function: O-methyltransferase activity (GO:0008171);; Molecular Function: S-adenosylmethionine-dependent methyltransferase activity (GO:0008757);; Cellular Component: membrane (GO:0016020);; Biological Process: methylation (GO:0032259);; Biological Process: cellular metabolic process (GO:0044237);; Biological Process: small molecule metab…	K00591|8.92175e-98|ssc:100152047|K00591 polyprenyldihydroxybenzoate methyltransferase / 3-demethylubiquinol 3-O-methyltransferase [EC:2.1.1.114 2.1.1.64] | (RefSeq) ubiquinone biosynthesis O-methyltransferase, mitochondrial	Ubiquinone and other terpenoid-quinone biosynthesis (ko00130)	[H]	Coenzyme transport and metabolism	Methyltransferase domain;; Methyltransferase domain;; Methyltransferase domain;; Methyltransferase domain;; Methyltransferase domain;; Mycolic acid cyclopropane synthetase;; Nodulation protein S (NodS);; Ribosomal protein L11 methyltransferase (PrmA)	Ubiquinone biosynthesis O-methyltransferase, mitochondrial OS=Bos taurus OX=9913 GN=COQ3 PE=2 SV=1	PREDICTED: ubiquinone biosynthesis O-methyltransferase, mitochondrial [Vicugna pacos]
ONT.285.8	[H]	Coenzyme transport and metabolism	Cellular Component: cytoplasm (GO:0005737);; Biological Process: metabolic process (GO:0008152);; Molecular Function: S-adenosylmethionine-dependent methyltransferase activity (GO:0008757);;	K00591|4.57342e-127|ssc:100152047|K00591 polyprenyldihydroxybenzoate methyltransferase / 3-demethylubiquinol 3-O-methyltransferase [EC:2.1.1.114 2.1.1.64] | (RefSeq) ubiquinone biosynthesis O-methyltransferase, mitochondrial	Ubiquinone and other terpenoid-quinone biosynthesis (ko00130)	[H]	Coenzyme transport and metabolism	Methyltransferase domain;; Methyltransferase domain;; Methyltransferase domain;; Mycolic acid cyclopropane synthetase	Ubiquinone biosynthesis O-methyltransferase, mitochondrial OS=Bos taurus OX=9913 GN=COQ3 PE=2 SV=1	ubiquinone biosynthesis O-methyltransferase, mitochondrial isoform X2 [Sus scrofa]
ONT.285.15	[H]	Coenzyme transport and metabolism	Cellular Component: mitochondrion (GO:0005739);; Molecular Function: O-methyltransferase activity (GO:0008171);; Molecular Function: S-adenosylmethionine-dependent methyltransferase activity (GO:0008757);; Cellular Component: membrane (GO:0016020);; Biological Process: methylation (GO:0032259);;	K00591|9.65902e-103|lve:103071140|K00591 polyprenyldihydroxybenzoate methyltransferase / 3-demethylubiquinol 3-O-methyltransferase [EC:2.1.1.114 2.1.1.64] | (RefSeq) COQ3; coenzyme Q3, methyltransferase	Ubiquinone and other terpenoid-quinone biosynthesis (ko00130)	[H]	Coenzyme transport and metabolism	--	Ubiquinone biosynthesis O-methyltransferase, mitochondrial OS=Bos taurus OX=9913 GN=COQ3 PE=2 SV=1	PREDICTED: ubiquinone biosynthesis O-methyltransferase, mitochondrial isoform X1 [Tursiops truncatus]
ONT.286.1	--	--	--	--	--	--	--	--	--	--
ONT.287.1	--	--	Cellular Component: membrane (GO:0016020);; Cellular Component: membrane-bounded organelle (GO:0043227);; Cellular Component: intracellular organelle (GO:0043229);; Cellular Component: cytoplasmic part (GO:0044444);;	--	--	--	--	--	--	lysosome-associated membrane glycoprotein 3 isoform X1 [Sus scrofa]
ONT.288.1	--	--	Cellular Component: intracellular part (GO:0044424);;	K13170|6.33039e-18|aml:100467672|K13170 splicing factor, arginine/serine-rich 18 | (RefSeq) PNISR, SFRS18; PNN interacting serine and arginine rich protein	--	--	--	--	--	PREDICTED: arginine/serine-rich protein PNISR isoform X3 [Ursus maritimus]
ONT.288.2	--	--	--	K13170|1.55956e-72|aam:106489673|K13170 splicing factor, arginine/serine-rich 18 | (RefSeq) PNISR; PNN interacting serine and arginine rich protein	--	--	--	Arginine/serine-rich protein PNISR	--	PREDICTED: arginine/serine-rich protein PNISR isoform X2 [Tupaia chinensis]
ONT.288.3	--	--	Cellular Component: nucleoplasm (GO:0005654);; Cellular Component: cytoplasm (GO:0005737);; Molecular Function: RNA binding (GO:0044822);;	K13170|1.10333e-71|oaa:100075431|K13170 splicing factor, arginine/serine-rich 18 | (RefSeq) PNISR; PNN interacting serine and arginine rich protein	--	--	--	Arginine/serine-rich protein PNISR	--	PREDICTED: arginine/serine-rich protein PNISR isoform X2 [Bison bison bison]
ONT.288.4	--	--	--	K13170|4.53574e-100|pon:100173425|K13170 splicing factor, arginine/serine-rich 18 | (RefSeq) PNISR, SFRS18; PNN interacting serine and arginine rich protein	--	--	--	Arginine/serine-rich protein PNISR;; Arginine/serine-rich protein PNISR	--	PREDICTED: arginine/serine-rich protein PNISR [Echinops telfairi]
ONT.288.5	--	--	--	K13170|7.03203e-82|fca:101084965|K13170 splicing factor, arginine/serine-rich 18 | (RefSeq) PNISR; PNN interacting serine and arginine rich protein	--	--	--	Arginine/serine-rich protein PNISR	--	PREDICTED: arginine/serine-rich protein PNISR isoform X2 [Bison bison bison]
ONT.288.6	--	--	--	K13170|2.60907e-115|myd:102772558|K13170 splicing factor, arginine/serine-rich 18 | (RefSeq) PNISR; PNN interacting serine and arginine rich protein	--	--	--	--	--	PREDICTED: arginine/serine-rich protein PNISR isoform X1 [Eptesicus fuscus]
ONT.288.7	--	--	--	K13170|1.51446e-110|umr:103675875|K13170 splicing factor, arginine/serine-rich 18 | (RefSeq) PNISR; PNN interacting serine and arginine rich protein	--	--	--	Arginine/serine-rich protein PNISR	--	PREDICTED: arginine/serine-rich protein PNISR isoform X1 [Ursus maritimus]
ONT.288.9	--	--	--	K13170|2.84359e-110|umr:103675875|K13170 splicing factor, arginine/serine-rich 18 | (RefSeq) PNISR; PNN interacting serine and arginine rich protein	--	--	--	Arginine/serine-rich protein PNISR	--	PREDICTED: arginine/serine-rich protein PNISR isoform X1 [Ursus maritimus]
ONT.288.10	--	--	Cellular Component: nucleoplasm (GO:0005654);; Cellular Component: cytoplasm (GO:0005737);; Molecular Function: RNA binding (GO:0044822);;	K13170|1.67349e-138|ssc:100134950|K13170 splicing factor, arginine/serine-rich 18 | (RefSeq) SFRS18, SRrp130; PNN-interacting serine/arginine-rich protein	--	--	--	Arginine/serine-rich protein PNISR	--	arginine/serine-rich protein PNISR isoform X1 [Sus scrofa]
ONT.288.11	--	--	--	K13170|5.26267e-51|tup:102495625|K13170 splicing factor, arginine/serine-rich 18 | (RefSeq) PNISR; PNN interacting serine and arginine rich protein	--	--	--	--	--	PREDICTED: arginine/serine-rich protein PNISR isoform X1 [Tupaia chinensis]
ONT.288.14	--	--	--	K13170|3.19745e-40|ssc:100134950|K13170 splicing factor, arginine/serine-rich 18 | (RefSeq) SFRS18, SRrp130; PNN-interacting serine/arginine-rich protein	--	--	--	--	--	arginine/serine-rich protein PNISR isoform X2 [Sus scrofa]
ONT.288.16	--	--	Cellular Component: nucleoplasm (GO:0005654);; Cellular Component: cytoplasm (GO:0005737);; Molecular Function: RNA binding (GO:0044822);;	K13170|5.90797e-100|ocu:100340759|K13170 splicing factor, arginine/serine-rich 18 | (RefSeq) PNISR; PNN interacting serine and arginine rich protein	--	--	--	Arginine/serine-rich protein PNISR	--	PREDICTED: arginine/serine-rich protein PNISR isoform X1 [Oryctolagus cuniculus]
ONT.288.17	--	--	Cellular Component: nucleoplasm (GO:0005654);; Cellular Component: cytoplasm (GO:0005737);; Molecular Function: RNA binding (GO:0044822);;	K13170|1.10146e-13|ssc:100134950|K13170 splicing factor, arginine/serine-rich 18 | (RefSeq) SFRS18, SRrp130; PNN-interacting serine/arginine-rich protein	--	--	--	--	--	arginine/serine-rich protein PNISR isoform X5 [Sus scrofa]
ONT.289.1	--	--	--	--	--	--	--	--	--	IL-23, partial [Sus scrofa]
ONT.290.1	--	--	Cellular Component: cyclin-dependent protein kinase holoenzyme complex (GO:0000307);; Cellular Component: nucleus (GO:0005634);; Molecular Function: cyclin-dependent protein serine/threonine kinase regulator activity (GO:0016538);; Biological Process: positive regulation of cyclin-dependent protein serine/threonine kinase activity (GO:0045737);; Biological Process: positive regulation of transcri…	--	--	--	--	--	--	cyclin-C isoform X2 [Sus scrofa]
ONT.291.1	--	--	Cellular Component: cyclin-dependent protein kinase holoenzyme complex (GO:0000307);; Cellular Component: nucleus (GO:0005634);; Molecular Function: cyclin-dependent protein serine/threonine kinase regulator activity (GO:0016538);; Biological Process: positive regulation of cyclin-dependent protein serine/threonine kinase activity (GO:0045737);; Biological Process: positive regulation of transcri…	K15161|5.56673e-97|umr:103675873|K15161 cyclin C | (RefSeq) CCNC; cyclin C	--	[K]	Transcription	Cyclin C-terminal domain	Cyclin-C OS=Bos taurus OX=9913 GN=CCNC PE=2 SV=1	PREDICTED: cyclin-C isoform X1 [Rousettus aegyptiacus]
ONT.291.2	--	--	Cellular Component: cyclin-dependent protein kinase holoenzyme complex (GO:0000307);; Molecular Function: cyclin-dependent protein serine/threonine kinase regulator activity (GO:0016538);; Cellular Component: mediator complex (GO:0016592);; Biological Process: positive regulation of cyclin-dependent protein serine/threonine kinase activity (GO:0045737);; Biological Process: positive regulation of…	K15161|0|aml:100476931|K15161 cyclin C | (RefSeq) CCNC; cyclin C	--	[K]	Transcription	Cyclin, N-terminal domain;; Cyclin C-terminal domain	Cyclin-C OS=Bos taurus OX=9913 GN=CCNC PE=2 SV=1	PREDICTED: cyclin-C isoform X2 [Rousettus aegyptiacus]
ONT.293.2	--	--	--	--	--	--	--	--	--	--
ONT.293.3	--	--	Biological Process: positive regulation of receptor recycling (GO:0001921);; Biological Process: response to ischemia (GO:0002931);; Molecular Function: structural molecule activity (GO:0005198);; Cellular Component: caveola (GO:0005901);; Cellular Component: bicellular tight junction (GO:0005923);; Biological Process: heart development (GO:0007507);; Biological Process: skeletal muscle tissue de…	K21108|6.65599e-94|ptg:102955331|K21108 blood vessel epicardial substance | (RefSeq) BVES; blood vessel epicardial substance	--	--	--	--	Blood vessel epicardial substance OS=Sus scrofa OX=9823 GN=BVES PE=2 SV=1	blood vessel epicardial substance isoform X1 [Sus scrofa]
ONT.293.4	--	--	--	--	--	--	--	--	--	--
ONT.293.5	--	--	Biological Process: cell morphogenesis (GO:0000902);; Biological Process: heart development (GO:0007507);; Biological Process: striated muscle tissue development (GO:0014706);; Biological Process: vesicle-mediated transport (GO:0016192);; Cellular Component: cell junction (GO:0030054);; Biological Process: locomotion (GO:0040011);; Biological Process: cell development (GO:0048468);; Biological Pr…	K21108|4.79034e-89|lve:103073815|K21108 blood vessel epicardial substance | (RefSeq) BVES; blood vessel epicardial substance	--	--	--	Popeye protein conserved region	Blood vessel epicardial substance OS=Sus scrofa OX=9823 GN=BVES PE=2 SV=1	PREDICTED: blood vessel epicardial substance isoform X1 [Lipotes vexillifer]
ONT.293.6	--	--	--	--	--	--	--	--	--	--
ONT.293.7	--	--	Cellular Component: nucleus (GO:0005634);; Biological Process: regulation of transcription, DNA-templated (GO:0006355);; Biological Process: positive regulation of biological process (GO:0048518);;	--	--	--	--	--	--	CREB-regulated transcription coactivator 2 isoform X3 [Sus scrofa]
ONT.295.1	--	--	Cellular Component: integral component of membrane (GO:0016021);; Biological Process: regulation of membrane potential (GO:0042391);;	--	--	--	--	--	Blood vessel epicardial substance OS=Sus scrofa OX=9823 GN=BVES PE=2 SV=1	PREDICTED: popeye domain-containing protein 3 isoform X2 [Condylura cristata]
ONT.295.2	--	--	--	--	--	--	--	--	--	popeye domain-containing protein 3 isoform X1 [Sus scrofa]
ONT.295.4	--	--	--	--	--	--	--	Popeye protein conserved region	Blood vessel epicardial substance OS=Sus scrofa OX=9823 GN=BVES PE=2 SV=1	popeye domain-containing protein 3 isoform X1 [Sus scrofa]
ONT.295.5	--	--	--	--	--	--	--	--	Blood vessel epicardial substance OS=Sus scrofa OX=9823 GN=BVES PE=2 SV=1	popeye domain-containing protein 3 isoform X1 [Sus scrofa]
ONT.295.6	--	--	--	--	--	--	--	--	--	popeye domain-containing protein 3 isoform X1 [Sus scrofa]
ONT.295.7	--	--	Cellular Component: integral component of membrane (GO:0016021);; Biological Process: regulation of membrane potential (GO:0042391);;	--	--	--	--	--	Blood vessel epicardial substance OS=Sus scrofa OX=9823 GN=BVES PE=2 SV=1	PREDICTED: popeye domain-containing protein 3 [Manis javanica]
ONT.295.9	--	--	Cellular Component: integral component of membrane (GO:0016021);; Biological Process: regulation of membrane potential (GO:0042391);;	--	--	--	--	--	Blood vessel epicardial substance OS=Sus scrofa OX=9823 GN=BVES PE=2 SV=1	PREDICTED: popeye domain-containing protein 3 [Lipotes vexillifer]
ONT.296.1	[E]	Amino acid transport and metabolism	Molecular Function: cytochrome-c oxidase activity (GO:0004129);; Molecular Function: serine-type endopeptidase activity (GO:0004252);; Cellular Component: nucleus (GO:0005634);; Cellular Component: cytoplasm (GO:0005737);; Biological Process: proteolysis (GO:0006508);; Cellular Component: membrane (GO:0016020);; Molecular Function: serine-type exopeptidase activity (GO:0070008);; Biological Proce…	K01322|6.46264e-56|cfr:106729000|K01322 prolyl oligopeptidase [EC:3.4.21.26] | (RefSeq) prolyl endopeptidase-like	Renin-angiotensin system (ko04614)	[O]	Posttranslational modification, protein turnover, chaperones	Prolyl oligopeptidase family	Prolyl endopeptidase OS=Sus scrofa OX=9823 GN=PREP PE=1 SV=1	PREDICTED: prolyl endopeptidase-like [Leptonychotes weddellii]
ONT.296.2	[E]	Amino acid transport and metabolism	Molecular Function: serine-type peptidase activity (GO:0008236);; Cellular Component: intracellular part (GO:0044424);;	K01322|6.39143e-53|cfr:106729000|K01322 prolyl oligopeptidase [EC:3.4.21.26] | (RefSeq) prolyl endopeptidase-like	Renin-angiotensin system (ko04614)	[O]	Posttranslational modification, protein turnover, chaperones	Prolyl oligopeptidase family	Prolyl endopeptidase OS=Sus scrofa OX=9823 GN=PREP PE=1 SV=1	PREDICTED: prolyl endopeptidase isoform X2 [Rousettus aegyptiacus]
ONT.296.3	[E]	Amino acid transport and metabolism	Molecular Function: serine-type endopeptidase activity (GO:0004252);; Cellular Component: nucleus (GO:0005634);; Cellular Component: cytoplasm (GO:0005737);; Biological Process: proteolysis (GO:0006508);; Cellular Component: membrane (GO:0016020);; Molecular Function: serine-type exopeptidase activity (GO:0070008);;	K01322|3.55013e-64|ssc:445540|K01322 prolyl oligopeptidase [EC:3.4.21.26] | (RefSeq) PREP; prolyl endopeptidase	Renin-angiotensin system (ko04614)	[O]	Posttranslational modification, protein turnover, chaperones	Prolyl oligopeptidase family	Prolyl endopeptidase OS=Sus scrofa OX=9823 GN=PREP PE=1 SV=1	prolyl endopeptidase [Sus scrofa]
ONT.297.1	--	--	--	--	--	--	--	--	--	--
ONT.298.1	--	--	Biological Process: autophagosome assembly (GO:0000045);; Biological Process: autophagy of mitochondrion (GO:0000422);; Biological Process: immune system process (GO:0002376);; Biological Process: C-terminal protein lipidation (GO:0006501);; Biological Process: cell death (GO:0008219);; Biological Process: cellular response to starvation (GO:0009267);; Cellular Component: membrane (GO:0016020);; …	K08339|1.04851e-82|cjc:100404382|K08339 autophagy-related protein 5 | (RefSeq) ATG5; autophagy related 5	Regulation of autophagy (ko04140);; Longevity regulating pathway (ko04211);; Longevity regulating pathway - multiple species (ko04213);; RIG-I-like receptor signaling pathway (ko04622)	[O]	Posttranslational modification, protein turnover, chaperones	Autophagy protein Apg5	Autophagy protein 5 OS=Bos taurus OX=9913 GN=ATG5 PE=2 SV=2	autophagy protein 5 isoform X4 [Loxodonta africana]
ONT.298.2	--	--	Biological Process: autophagosome assembly (GO:0000045);; Biological Process: autophagy of mitochondrion (GO:0000422);; Cellular Component: axoneme (GO:0005930);; Biological Process: C-terminal protein lipidation (GO:0006501);; Biological Process: apoptotic process (GO:0006915);; Biological Process: immune response (GO:0006955);; Biological Process: cellular response to nitrogen starvation (GO:00…	K08339|4.55446e-83|cjc:100404382|K08339 autophagy-related protein 5 | (RefSeq) ATG5; autophagy related 5	Regulation of autophagy (ko04140);; Longevity regulating pathway (ko04211);; Longevity regulating pathway - multiple species (ko04213);; RIG-I-like receptor signaling pathway (ko04622)	[O]	Posttranslational modification, protein turnover, chaperones	Autophagy protein Apg5	Autophagy protein 5 OS=Bos taurus OX=9913 GN=ATG5 PE=2 SV=2	autophagy related 5-like protein [Sus scrofa]
ONT.298.3	--	--	Biological Process: autophagosome assembly (GO:0000045);; Biological Process: autophagy of mitochondrion (GO:0000422);; Biological Process: immune system process (GO:0002376);; Biological Process: C-terminal protein lipidation (GO:0006501);; Biological Process: cellular response to starvation (GO:0009267);; Cellular Component: membrane (GO:0016020);; Biological Process: regulation of cellular met…	K08339|1.70513e-28|cfr:102514575|K08339 autophagy-related protein 5 | (RefSeq) ATG5; autophagy related 5	Regulation of autophagy (ko04140);; Longevity regulating pathway (ko04211);; Longevity regulating pathway - multiple species (ko04213);; RIG-I-like receptor signaling pathway (ko04622)	[O]	Posttranslational modification, protein turnover, chaperones	--	Autophagy protein 5 OS=Bos taurus OX=9913 GN=ATG5 PE=2 SV=2	autophagy protein 5 isoform X5 [Sus scrofa]
ONT.299.1	[J]	Translation, ribosomal structure and biogenesis	Molecular Function: ATP binding (GO:0005524);; Cellular Component: mitochondrion (GO:0005739);; Molecular Function: transferase activity (GO:0016740);; Cellular Component: glutamyl-tRNA(Gln) amidotransferase complex (GO:0030956);; Biological Process: regulation of protein stability (GO:0031647);; Biological Process: mitochondrial translation (GO:0032543);; Molecular Function: glutaminyl-tRNA synt…	K02433|3.68583e-165|ssc:100737502|K02433 aspartyl-tRNA(Asn)/glutamyl-tRNA(Gln) amidotransferase subunit A [EC:6.3.5.6 6.3.5.7] | (RefSeq) glutamyl-tRNA(Gln) amidotransferase subunit A, mitochondrial	Aminoacyl-tRNA biosynthesis (ko00970)	[J]	Translation, ribosomal structure and biogenesis	Amidase;; Amidase;; Amidase	Glutamyl-tRNA(Gln) amidotransferase subunit A, mitochondrial OS=Bos taurus OX=9913 GN=QRSL1 PE=2 SV=1	PREDICTED: glutamyl-tRNA(Gln) amidotransferase subunit A, mitochondrial isoform X1 [Bos taurus]
ONT.299.2	[J]	Translation, ribosomal structure and biogenesis	Molecular Function: ATP binding (GO:0005524);; Cellular Component: mitochondrion (GO:0005739);; Molecular Function: transferase activity (GO:0016740);; Cellular Component: glutamyl-tRNA(Gln) amidotransferase complex (GO:0030956);; Biological Process: regulation of protein stability (GO:0031647);; Biological Process: mitochondrial translation (GO:0032543);; Molecular Function: glutaminyl-tRNA synt…	K02433|0|tup:102474293|K02433 aspartyl-tRNA(Asn)/glutamyl-tRNA(Gln) amidotransferase subunit A [EC:6.3.5.6 6.3.5.7] | (RefSeq) QRSL1; glutaminyl-tRNA synthase (glutamine-hydrolyzing)-like 1	Aminoacyl-tRNA biosynthesis (ko00970)	[J]	Translation, ribosomal structure and biogenesis	Amidase;; Amidase;; Amidase;; Amidase	Glutamyl-tRNA(Gln) amidotransferase subunit A, mitochondrial OS=Ornithorhynchus anatinus OX=9258 GN=QRSL1 PE=3 SV=1	PREDICTED: glutamyl-tRNA(Gln) amidotransferase subunit A, mitochondrial [Tupaia chinensis]
ONT.299.4	--	--	Molecular Function: ligase activity (GO:0016874);; Biological Process: cellular nitrogen compound metabolic process (GO:0034641);; Biological Process: primary metabolic process (GO:0044238);; Biological Process: cellular macromolecule metabolic process (GO:0044260);; Biological Process: organonitrogen compound metabolic process (GO:1901564);;	K02433|3.70109e-14|ssc:100737502|K02433 aspartyl-tRNA(Asn)/glutamyl-tRNA(Gln) amidotransferase subunit A [EC:6.3.5.6 6.3.5.7] | (RefSeq) glutamyl-tRNA(Gln) amidotransferase subunit A, mitochondrial	Aminoacyl-tRNA biosynthesis (ko00970)	[J]	Translation, ribosomal structure and biogenesis	--	Glutamyl-tRNA(Gln) amidotransferase subunit A, mitochondrial OS=Bos taurus OX=9913 GN=QRSL1 PE=2 SV=1	glutamyl-tRNA(Gln) amidotransferase subunit A, mitochondrial isoform X1 [Sus scrofa]
ONT.300.1	[CR]	Energy production and conversion;; General function prediction only	--	--	--	[CR]	Energy production and conversion;; General function prediction only	Zinc-binding dehydrogenase	Reticulon-4-interacting protein 1, mitochondrial OS=Bos taurus OX=9913 GN=RTN4IP1 PE=2 SV=1	reticulon-4-interacting protein 1, mitochondrial isoform X1 [Sus scrofa]
ONT.301.1	--	--	Cellular Component: mitochondrial inner membrane (GO:0005743);; Cellular Component: integral component of membrane (GO:0016021);;	--	--	[S]	Function unknown	Protein of unknown function (DUF423)	Transmembrane protein 256 OS=Bos taurus OX=9913 GN=TMEM256 PE=3 SV=1	transmembrane protein 256 [Delphinapterus leucas]
ONT.302.1	--	--	--	--	--	[S]	Function unknown	--	--	uncharacterized protein C6orf203 homolog [Sus scrofa]
ONT.302.2	--	--	--	--	--	[S]	Function unknown	--	--	uncharacterized protein C6orf203 homolog [Sus scrofa]
ONT.302.3	--	--	Cellular Component: mitochondrion (GO:0005739);;	--	--	[S]	Function unknown	--	--	PREDICTED: uncharacterized protein C6orf203 homolog [Ochotona princeps]
ONT.302.4	--	--	Molecular Function: RNA binding (GO:0003723);; Cellular Component: mitochondrion (GO:0005739);;	--	--	[S]	Function unknown	--	--	PREDICTED: uncharacterized protein C6orf203 homolog [Camelus dromedarius]
ONT.302.5	--	--	--	--	--	[S]	Function unknown	--	--	uncharacterized protein C6orf203 homolog [Sus scrofa]
ONT.302.6	--	--	--	--	--	[S]	Function unknown	--	--	PREDICTED: uncharacterized protein C6orf203 homolog [Myotis brandtii]
ONT.302.7	--	--	--	--	--	[S]	Function unknown	--	--	PREDICTED: uncharacterized protein C6orf203 homolog [Lipotes vexillifer]
ONT.302.8	--	--	--	--	--	[S]	Function unknown	--	--	uncharacterized protein C6orf203 homolog [Sus scrofa]
ONT.302.10	--	--	Cellular Component: mitochondrion (GO:0005739);;	--	--	[S]	Function unknown	--	--	uncharacterized protein C6orf203 homolog [Sus scrofa]
ONT.302.11	--	--	--	--	--	[S]	Function unknown	--	--	uncharacterized protein C6orf203 homolog [Sus scrofa]
ONT.302.13	--	--	--	--	--	[S]	Function unknown	--	--	uncharacterized protein C6orf203 homolog [Sus scrofa]
ONT.302.14	--	--	--	--	--	[S]	Function unknown	--	--	uncharacterized protein C6orf203 homolog [Sus scrofa]
ONT.302.15	--	--	--	--	--	[S]	Function unknown	--	--	uncharacterized protein C6orf203 homolog [Sus scrofa]
ONT.304.1	--	--	--	K12505|4.08904e-56|hsa:57107|K12505 decaprenyl-diphosphate synthase subunit 2 [EC:2.5.1.91] | (RefSeq) PDSS2, C6orf210, COQ10D3, DLP1, bA59I9.3, hDLP1; decaprenyl diphosphate synthase subunit 2	Terpenoid backbone biosynthesis (ko00900)	[H]	Coenzyme transport and metabolism	--	--	PREDICTED: decaprenyl-diphosphate synthase subunit 2 isoform X1 [Capra hircus]
ONT.305.1	--	--	--	--	--	--	--	--	--	hypothetical protein D623_10034684 [Myotis brandtii]
ONT.306.1	--	--	--	--	--	--	--	--	--	--
ONT.307.1	--	--	--	--	--	--	--	--	--	--
ONT.308.1	--	--	--	--	--	--	--	--	--	--
ONT.309.1	--	--	Biological Process: protein targeting to membrane (GO:0006612);; Cellular Component: integral component of membrane (GO:0016021);; Biological Process: protein targeting to ER (GO:0045047);; Biological Process: system development (GO:0048731);;	K09540|6.25639e-38|mgp:100546640|K09540 translocation protein SEC63 | (RefSeq) translocation protein SEC63 homolog	Protein export (ko03060);; Protein processing in endoplasmic reticulum (ko04141)	[UO]	Intracellular trafficking, secretion, and vesicular transport;; Posttranslational modification, protein turnover, chaperones	--	Translocation protein SEC63 homolog OS=Pongo abelii OX=9601 GN=SEC63 PE=2 SV=1	LOW QUALITY PROTEIN: translocation protein SEC63 homolog [Dasypus novemcinctus]
ONT.310.2	--	--	Cellular Component: cytoplasm (GO:0005737);; Cellular Component: membrane (GO:0016020);; Cellular Component: intracellular membrane-bounded organelle (GO:0043231);;	--	--	[S]	Function unknown	Osteopetrosis-associated transmembrane protein 1 precursor	--	osteopetrosis-associated transmembrane protein 1 [Sus scrofa]
ONT.310.3	--	--	Cellular Component: cytoplasm (GO:0005737);; Cellular Component: membrane (GO:0016020);; Cellular Component: intracellular membrane-bounded organelle (GO:0043231);;	--	--	[S]	Function unknown	Osteopetrosis-associated transmembrane protein 1 precursor;; Osteopetrosis-associated transmembrane protein 1 precursor	--	osteopetrosis-associated transmembrane protein 1, partial [Sus scrofa]
ONT.311.2	--	--	Cellular Component: cytosol (GO:0005829);; Biological Process: response to bacterium (GO:0009617);; Biological Process: membrane invagination (GO:0010324);; Cellular Component: extrinsic component of membrane (GO:0019898);; Molecular Function: protein phosphatase binding (GO:0019903);; Biological Process: protein to membrane docking (GO:0022615);; Biological Process: regulation of Wnt signaling p…	K17918|2.3908e-85|rro:104677469|K17918 sorting nexin-3/12 | (RefSeq) SNX3; sorting nexin 3	Endocytosis (ko04144)	[U]	Intracellular trafficking, secretion, and vesicular transport	PX domain	Sorting nexin-3 OS=Pongo abelii OX=9601 GN=SNX3 PE=2 SV=3	PREDICTED: sorting nexin-3-like isoform X2 [Odobenus rosmarus divergens]
ONT.311.4	--	--	Cellular Component: cytosol (GO:0005829);; Biological Process: response to bacterium (GO:0009617);; Biological Process: membrane invagination (GO:0010324);; Cellular Component: extrinsic component of membrane (GO:0019898);; Molecular Function: protein phosphatase binding (GO:0019903);; Biological Process: protein to membrane docking (GO:0022615);; Biological Process: regulation of Wnt signaling p…	K17918|1.65894e-67|tup:102479211|K17918 sorting nexin-3/12 | (RefSeq) SNX3; sorting nexin 3	Endocytosis (ko04144)	[U]	Intracellular trafficking, secretion, and vesicular transport	--	Sorting nexin-3 OS=Pongo abelii OX=9601 GN=SNX3 PE=2 SV=3	LOW QUALITY PROTEIN: sorting nexin-3-like [Felis catus]
ONT.311.7	--	--	Cellular Component: cytosol (GO:0005829);; Biological Process: response to bacterium (GO:0009617);; Biological Process: membrane invagination (GO:0010324);; Cellular Component: extrinsic component of membrane (GO:0019898);; Molecular Function: protein phosphatase binding (GO:0019903);; Biological Process: protein to membrane docking (GO:0022615);; Biological Process: regulation of Wnt signaling p…	K17918|4.31539e-56|nle:100592183|K17918 sorting nexin-3/12 | (RefSeq) SNX3; sorting nexin 3	Endocytosis (ko04144)	[U]	Intracellular trafficking, secretion, and vesicular transport	PX domain	Sorting nexin-3 OS=Pongo abelii OX=9601 GN=SNX3 PE=2 SV=3	PREDICTED: sorting nexin-3 isoform X1 [Monodelphis domestica]
ONT.311.8	--	--	Cellular Component: cytosol (GO:0005829);; Biological Process: response to bacterium (GO:0009617);; Biological Process: membrane invagination (GO:0010324);; Cellular Component: extrinsic component of membrane (GO:0019898);; Molecular Function: protein phosphatase binding (GO:0019903);; Biological Process: protein to membrane docking (GO:0022615);; Biological Process: regulation of Wnt signaling p…	K17918|1.08574e-25|tup:102479211|K17918 sorting nexin-3/12 | (RefSeq) SNX3; sorting nexin 3	Endocytosis (ko04144)	[U]	Intracellular trafficking, secretion, and vesicular transport	--	Sorting nexin-3 OS=Pongo abelii OX=9601 GN=SNX3 PE=2 SV=3	PREDICTED: sorting nexin-3 [Tupaia chinensis]
ONT.312.1	--	--	--	--	--	--	--	--	--	--
ONT.313.1	--	--	--	--	--	--	--	--	--	--
ONT.314.1	--	--	--	--	--	--	--	--	--	--
ONT.315.1	--	--	--	--	--	--	--	--	--	--
ONT.315.2	--	--	--	--	--	--	--	--	--	--
ONT.317.1	--	--	--	--	--	[TW]	Signal transduction mechanisms;; Extracellular structures	--	Armadillo repeat-containing protein 2 OS=Bos taurus OX=9913 GN=ARMC2 PE=4 SV=1	armadillo repeat-containing protein 2 isoform X3 [Sus scrofa]
ONT.318.1	--	--	Cellular Component: nucleus (GO:0005634);; Biological Process: regulation of response to reactive oxygen species (GO:1901031);;	K10141|2.21799e-77|bom:102271091|K10141 sestrin 1/3 | (RefSeq) SESN1, Sestrin-1; sestrin 1	p53 signaling pathway (ko04115);; Longevity regulating pathway (ko04211)	[S]	Function unknown	--	Sestrin-1 OS=Macaca fascicularis OX=9541 GN=SESN1 PE=2 SV=1	sestrin-1 isoform X1 [Sus scrofa]
ONT.318.2	--	--	--	K10141|3.52545e-29|ptg:102963629|K10141 sestrin 1/3 | (RefSeq) SESN1; sestrin 1	p53 signaling pathway (ko04115);; Longevity regulating pathway (ko04211)	[S]	Function unknown	--	Sestrin-1 OS=Macaca fascicularis OX=9541 GN=SESN1 PE=2 SV=1	sestrin-1 isoform X1 [Sus scrofa]
ONT.319.8	--	--	--	--	--	--	--	--	--	--
ONT.319.9	--	--	Cellular Component: membrane (GO:0016020);;	--	--	--	--	--	--	protein FAM76A isoform X2 [Sus scrofa]
ONT.320.1	--	--	--	--	--	--	--	--	--	--
ONT.321.2	--	--	--	--	--	--	--	--	--	--
ONT.321.3	--	--	--	--	--	--	--	--	LINE-1 reverse transcriptase homolog OS=Nycticebus coucang OX=9470 PE=3 SV=1	hypothetical protein M91_12051, partial [Bos mutus]
ONT.324.1	--	--	--	--	--	--	--	--	--	putative uncharacterized protein C6orf183 homolog isoform X8 [Sus scrofa]
ONT.324.2	--	--	--	--	--	--	--	--	--	putative uncharacterized protein C6orf183 homolog isoform X4 [Sus scrofa]
ONT.324.3	--	--	--	--	--	--	--	--	--	putative uncharacterized protein C6orf183 homolog isoform X8 [Sus scrofa]
ONT.325.1	--	--	Cellular Component: lysosome (GO:0005764);; Cellular Component: endosome (GO:0005768);; Cellular Component: plasma membrane (GO:0005886);; Biological Process: heterophilic cell-cell adhesion via plasma membrane cell adhesion molecules (GO:0007157);; Cellular Component: integral component of membrane (GO:0016021);;	K06546|3.79276e-51|ssc:100152548|K06546 CD164 antigen | (RefSeq) CD164; CD164 molecule	Lysosome (ko04142)	--	--	Multi-glycosylated core protein 24 (MGC-24), sialomucin	Sialomucin core protein 24 OS=Bos taurus OX=9913 GN=CD164 PE=2 SV=1	sialomucin core protein 24 isoform X1 [Sus scrofa]
ONT.325.4	--	--	Cellular Component: lysosome (GO:0005764);; Cellular Component: endosome (GO:0005768);; Cellular Component: plasma membrane (GO:0005886);; Biological Process: heterophilic cell-cell adhesion via plasma membrane cell adhesion molecules (GO:0007157);; Cellular Component: integral component of membrane (GO:0016021);;	K06546|3.6608e-24|ssc:100152548|K06546 CD164 antigen | (RefSeq) CD164; CD164 molecule	Lysosome (ko04142)	--	--	--	Sialomucin core protein 24 OS=Bos taurus OX=9913 GN=CD164 PE=2 SV=1	PREDICTED: sialomucin core protein 24 isoform X2 [Miniopterus natalensis]
ONT.325.6	--	--	Biological Process: cell adhesion (GO:0007155);; Cellular Component: membrane (GO:0016020);; Cellular Component: membrane-bounded organelle (GO:0043227);; Cellular Component: intracellular organelle (GO:0043229);; Cellular Component: cytoplasmic part (GO:0044444);;	K06546|2.23435e-43|ssc:100152548|K06546 CD164 antigen | (RefSeq) CD164; CD164 molecule	Lysosome (ko04142)	--	--	--	Sialomucin core protein 24 OS=Bos taurus OX=9913 GN=CD164 PE=2 SV=1	sialomucin core protein 24 isoform X1 [Sus scrofa]
ONT.325.7	--	--	--	K06546|2.12732e-36|ssc:100152548|K06546 CD164 antigen | (RefSeq) CD164; CD164 molecule	Lysosome (ko04142)	--	--	--	Sialomucin core protein 24 OS=Bos taurus OX=9913 GN=CD164 PE=2 SV=1	sialomucin core protein 24 isoform X1 [Sus scrofa]
ONT.325.8	--	--	--	K06546|1.24087e-22|ssc:100152548|K06546 CD164 antigen | (RefSeq) CD164; CD164 molecule	Lysosome (ko04142)	--	--	--	Sialomucin core protein 24 OS=Bos taurus OX=9913 GN=CD164 PE=2 SV=1	sialomucin core protein 24 isoform X1 [Sus scrofa]
ONT.325.9	--	--	--	K06546|8.17064e-38|ssc:100152548|K06546 CD164 antigen | (RefSeq) CD164; CD164 molecule	Lysosome (ko04142)	--	--	--	Sialomucin core protein 24 OS=Bos taurus OX=9913 GN=CD164 PE=2 SV=1	sialomucin core protein 24 isoform X1 [Sus scrofa]
ONT.325.11	--	--	Cellular Component: lysosome (GO:0005764);; Cellular Component: endosome (GO:0005768);; Cellular Component: plasma membrane (GO:0005886);; Biological Process: heterophilic cell-cell adhesion via plasma membrane cell adhesion molecules (GO:0007157);; Cellular Component: integral component of membrane (GO:0016021);;	K06546|5.36983e-46|ssc:100152548|K06546 CD164 antigen | (RefSeq) CD164; CD164 molecule	Lysosome (ko04142)	--	--	--	Sialomucin core protein 24 OS=Bos taurus OX=9913 GN=CD164 PE=2 SV=1	sialomucin core protein 24 isoform X1 [Sus scrofa]
ONT.325.12	--	--	Cellular Component: lysosome (GO:0005764);; Cellular Component: endosome (GO:0005768);; Cellular Component: plasma membrane (GO:0005886);; Biological Process: heterophilic cell-cell adhesion via plasma membrane cell adhesion molecules (GO:0007157);; Cellular Component: integral component of membrane (GO:0016021);;	K06546|9.22087e-47|ssc:100152548|K06546 CD164 antigen | (RefSeq) CD164; CD164 molecule	Lysosome (ko04142)	--	--	--	Sialomucin core protein 24 OS=Bos taurus OX=9913 GN=CD164 PE=2 SV=1	sialomucin core protein 24 isoform X1 [Sus scrofa]
ONT.326.1	--	--	Molecular Function: sphingomyelin phosphodiesterase activity (GO:0004767);; Cellular Component: integral component of membrane (GO:0016021);;	K12351|7.70593e-68|ggo:101128835|K12351 sphingomyelin phosphodiesterase 2 [EC:3.1.4.12] | (RefSeq) SMPD2; sphingomyelin phosphodiesterase 2	Sphingolipid metabolism (ko00600);; Sphingolipid signaling pathway (ko04071)	[T]	Signal transduction mechanisms	--	--	PREDICTED: sphingomyelin phosphodiesterase 2 [Sorex araneus]
ONT.327.1	--	--	Biological Process: negative regulation of protein phosphorylation (GO:0001933);; Molecular Function: actin binding (GO:0003779);; Cellular Component: cytoplasm (GO:0005737);; Molecular Function: zinc ion binding (GO:0008270);; Molecular Function: oxidoreductase activity, acting on paired donors, with incorporation or reduction of molecular oxygen, NAD(P)H as one donor, and incorporation of one a…	K19947|2.83835e-40|ssc:100153346|K19947 protein-methionine sulfoxide oxidase MICAL [EC:1.14.13.-] | (RefSeq) MICAL1; microtubule associated monooxygenase, calponin and LIM domain containing 1	--	[TZ]	Signal transduction mechanisms;; Cytoskeleton	Protein of unknown function (DUF3585);; Protein of unknown function (DUF3585)	[F-actin]-monooxygenase MICAL1 OS=Bos taurus OX=9913 GN=MICAL1 PE=2 SV=1	F-actin-methionine sulfoxide oxidase MICAL1 isoform X2 [Sus scrofa]
ONT.328.1	--	--	Biological Process: single-organism cellular process (GO:0044763);;	--	--	[I]	Lipid transport and metabolism	SacI homology domain	Synaptojanin-1 (Fragment) OS=Bos taurus OX=9913 GN=SYNJ1 PE=1 SV=2	polyphosphoinositide phosphatase isoform X1 [Physeter catodon]
ONT.328.2	--	--	Biological Process: nervous system development (GO:0007399);; Cellular Component: membrane (GO:0016020);; Biological Process: single-organism cellular process (GO:0044763);;	--	--	[I]	Lipid transport and metabolism	--	--	PREDICTED: polyphosphoinositide phosphatase isoform X2 [Bos taurus]
ONT.329.3	[R]	General function prediction only	--	K12816|4.52545e-158|dre:494534|K12816 pre-mRNA-processing factor 17 | (RefSeq) cdc40, zgc:86860; cell division cycle 40 homolog (S. cerevisiae)	Spliceosome (ko03040)	[S]	Function unknown	--	Platelet-activating factor acetylhydrolase IB subunit alpha OS=Sus scrofa OX=9823 GN=PAFAH1B1 PE=2 SV=3	Pre-mRNA-processing factor 17 [Tupaia chinensis]
ONT.330.1	[E]	Amino acid transport and metabolism	Biological Process: alpha-amino acid metabolic process (GO:1901605);;	K00272|6.35409e-79|umr:103677001|K00272 D-aspartate oxidase [EC:1.4.3.1] | (RefSeq) DDO; D-aspartate oxidase	Alanine, aspartate and glutamate metabolism (ko00250);; Peroxisome (ko04146)	[E]	Amino acid transport and metabolism	--	D-aspartate oxidase OS=Sus scrofa OX=9823 GN=DDO PE=2 SV=1	PREDICTED: D-aspartate oxidase [Ursus maritimus]
ONT.330.4	[E]	Amino acid transport and metabolism	Biological Process: alpha-amino acid metabolic process (GO:1901605);;	K00272|1.08339e-105|ssc:100037287|K00272 D-aspartate oxidase [EC:1.4.3.1] | (RefSeq) DDO; D-aspartate oxidase	Alanine, aspartate and glutamate metabolism (ko00250);; Peroxisome (ko04146)	[E]	Amino acid transport and metabolism	--	D-aspartate oxidase OS=Sus scrofa OX=9823 GN=DDO PE=2 SV=1	D-aspartate oxidase [Sus scrofa]
ONT.332.3	--	--	Biological Process: ion transport (GO:0006811);; Cellular Component: membrane (GO:0016020);; Molecular Function: transmembrane transporter activity (GO:0022857);; Biological Process: single-organism process (GO:0044699);; Biological Process: organic substance transport (GO:0071702);;	K08212|2.19238e-124|ssc:100525793|K08212 MFS transporter, OCT family, solute carrier family 22 (organic cation transporter), member 16 | (RefSeq) solute carrier family 22 member 16-like	--	[R]	General function prediction only	--	Solute carrier family 22 member 16 OS=Bos taurus OX=9913 GN=SLC22A16 PE=2 SV=2	solute carrier family 22 member 16 isoform X1 [Sus scrofa]
ONT.334.1	--	--	Molecular Function: adenosylmethionine decarboxylase activity (GO:0004014);; Cellular Component: cytosol (GO:0005829);; Biological Process: spermine biosynthetic process (GO:0006597);; Biological Process: spermidine biosynthetic process (GO:0008295);; Molecular Function: putrescine binding (GO:0019810);;	K01611|5.24525e-108|ssc:100155925|K01611 S-adenosylmethionine decarboxylase [EC:4.1.1.50] | (RefSeq) AMD1; adenosylmethionine decarboxylase 1	Cysteine and methionine metabolism (ko00270);; Arginine and proline metabolism (ko00330)	[T]	Signal transduction mechanisms	Adenosylmethionine decarboxylase	S-adenosylmethionine decarboxylase proenzyme OS=Bos taurus OX=9913 GN=AMD1 PE=1 SV=1	S-adenosylmethionine decarboxylase proenzyme [Sus scrofa]
ONT.334.2	--	--	Molecular Function: adenosylmethionine decarboxylase activity (GO:0004014);; Cellular Component: cytosol (GO:0005829);; Biological Process: spermine biosynthetic process (GO:0006597);; Biological Process: spermidine biosynthetic process (GO:0008295);; Molecular Function: putrescine binding (GO:0019810);;	K01611|7.04287e-89|phd:102320039|K01611 S-adenosylmethionine decarboxylase [EC:4.1.1.50] | (RefSeq) S-adenosylmethionine decarboxylase proenzyme-like	Cysteine and methionine metabolism (ko00270);; Arginine and proline metabolism (ko00330)	[T]	Signal transduction mechanisms	--	S-adenosylmethionine decarboxylase proenzyme OS=Bos taurus OX=9913 GN=AMD1 PE=1 SV=1	S-adenosylmethionine decarboxylase proenzyme [Tupaia chinensis]
ONT.334.4	--	--	Biological Process: polyamine biosynthetic process (GO:0006596);; Molecular Function: lyase activity (GO:0016829);; Biological Process: ammonium ion metabolic process (GO:0097164);;	--	--	[T]	Signal transduction mechanisms	Adenosylmethionine decarboxylase;; Adenosylmethionine decarboxylase	S-adenosylmethionine decarboxylase proenzyme OS=Bos taurus OX=9913 GN=AMD1 PE=1 SV=1	LOW QUALITY PROTEIN: S-adenosylmethionine decarboxylase proenzyme-like [Sus scrofa]
ONT.336.1	--	--	Biological Process: ribosomal large subunit assembly (GO:0000027);; Biological Process: maturation of LSU-rRNA from tricistronic rRNA transcript (SSU-rRNA, 5.8S rRNA, LSU-rRNA) (GO:0000463);; Cellular Component: nucleolus (GO:0005730);; Molecular Function: rRNA binding (GO:0019843);; Molecular Function: RNA binding (GO:0044822);;	K14847|9.92313e-135|ssc:100525264|K14847 ribosome production factor 2 | (RefSeq) RPF2; ribosome production factor 2 homolog	--	[J]	Translation, ribosomal structure and biogenesis	Brix domain	Ribosome production factor 2 homolog OS=Bos taurus OX=9913 GN=RPF2 PE=2 SV=1	ribosome production factor 2 homolog isoform X1 [Sus scrofa]
ONT.336.4	--	--	--	K14847|5.30543e-50|cge:100770065|K14847 ribosome production factor 2 | (RefSeq) Rpf2; ribosome production factor 2 homolog	--	[J]	Translation, ribosomal structure and biogenesis	--	Ribosome production factor 2 homolog OS=Bos taurus OX=9913 GN=RPF2 PE=2 SV=1	ribosome production factor 2 homolog isoform X2 [Sus scrofa]
ONT.336.5	--	--	--	K14847|2.08586e-68|phd:102331315|K14847 ribosome production factor 2 | (RefSeq) RPF2; ribosome production factor 2 homolog	--	[J]	Translation, ribosomal structure and biogenesis	--	Ribosome production factor 2 homolog OS=Bos taurus OX=9913 GN=RPF2 PE=2 SV=1	PREDICTED: ribosome production factor 2 homolog isoform X1 [Rhinolophus sinicus]
ONT.338.2	--	--	--	--	--	--	--	--	--	--
ONT.338.3	--	--	Molecular Function: SNARE binding (GO:0000149);; Molecular Function: nucleic acid binding (GO:0003676);; Molecular Function: transcription factor activity, sequence-specific DNA binding (GO:0003700);; Molecular Function: SNAP receptor activity (GO:0005484);; Biological Process: regulation of transcription, DNA-templated (GO:0006355);; Biological Process: exocytosis (GO:0006887);; Biological Proce…	--	--	--	--	--	--	zinc finger protein 665-like isoform X3 [Sus scrofa]
ONT.338.4	--	--	--	--	--	--	--	--	--	--
ONT.338.5	--	--	Biological Process: ion transport (GO:0006811);; Cellular Component: integral component of membrane (GO:0016021);; Molecular Function: transmembrane transporter activity (GO:0022857);; Biological Process: single-organism transport (GO:0044765);; Biological Process: transmembrane transport (GO:0055085);; Biological Process: organic substance transport (GO:0071702);; Biological Process: nitrogen co…	K08187|7.58412e-70|ngi:103749540|K08187 MFS transporter, MCP family, solute carrier family 16 (monocarboxylic acid transporters), member 10 | (RefSeq) Slc16a10; solute carrier family 16 member 10	Thyroid hormone signaling pathway (ko04919);; Protein digestion and absorption (ko04974)	[G]	Carbohydrate transport and metabolism	--	--	monocarboxylate transporter 10 isoform X2 [Sus scrofa]
ONT.338.6	--	--	--	--	--	--	--	--	--	--
ONT.338.7	--	--	Cellular Component: integral component of plasma membrane (GO:0005887);; Molecular Function: aromatic amino acid transmembrane transporter activity (GO:0015173);; Molecular Function: thyroid hormone transmembrane transporter activity (GO:0015349);; Biological Process: aromatic amino acid transport (GO:0015801);; Biological Process: ion transmembrane transport (GO:0034220);; Biological Process: th…	K08187|4.43534e-18|phd:102334618|K08187 MFS transporter, MCP family, solute carrier family 16 (monocarboxylic acid transporters), member 10 | (RefSeq) SLC16A10; solute carrier family 16 member 10	Thyroid hormone signaling pathway (ko04919);; Protein digestion and absorption (ko04974)	[G]	Carbohydrate transport and metabolism	--	--	PREDICTED: monocarboxylate transporter 10 [Rhinolophus sinicus]
ONT.339.1	--	--	--	--	--	--	--	--	--	--
ONT.340.1	--	--	--	--	--	--	--	--	--	--
ONT.340.2	--	--	--	K08175|2.9204e-82|bacu:103011494|K08175 MFS transporter, FHS family, Na+ dependent glucose transporter 1 | (RefSeq) MFSD4B, KIAA1919; major facilitator superfamily domain containing 4B	--	--	--	--	--	LOW QUALITY PROTEIN: sodium-dependent glucose transporter 1 [Physeter catodon]
ONT.340.4	--	--	--	K08175|5.03196e-26|ssc:100515422|K08175 MFS transporter, FHS family, Na+ dependent glucose transporter 1 | (RefSeq) MFSD4B, KIAA1919; major facilitator superfamily domain containing 4B	--	--	--	--	--	LOW QUALITY PROTEIN: sodium-dependent glucose transporter 1 [Sus scrofa]
ONT.342.1	--	--	Molecular Function: nucleic acid binding (GO:0003676);; Molecular Function: transcription factor activity, sequence-specific DNA binding (GO:0003700);; Biological Process: regulation of transcription, DNA-templated (GO:0006355);; Molecular Function: metal ion binding (GO:0046872);;	--	--	--	--	--	--	vesicle-trafficking protein SEC22a isoform X4 [Sus scrofa]
ONT.342.2	--	--	--	--	--	--	--	--	--	vesicle-trafficking protein SEC22a isoform X4 [Sus scrofa]
ONT.343.2	--	--	--	--	--	--	--	--	--	--
ONT.344.1	--	--	--	--	--	--	--	--	--	--
ONT.345.1	--	--	Cellular Component: membrane (GO:0016020);;	--	--	--	--	--	--	lysosome-associated membrane glycoprotein 3 isoform X1 [Sus scrofa]
ONT.346.1	--	--	--	--	--	--	--	--	--	--
ONT.347.1	--	--	--	--	--	--	--	--	--	uncharacterized protein LOC102167874 [Sus scrofa]
ONT.347.2	--	--	--	--	--	--	--	--	--	--
ONT.347.3	--	--	--	--	--	--	--	--	--	--
ONT.347.4	--	--	--	--	--	--	--	--	--	--
ONT.349.1	--	--	--	K21124|0|cfr:102507269|K21124 adaptor protein CIKS | (RefSeq) TRAF3IP2; TRAF3 interacting protein 2	--	--	--	SEFIR domain	--	adapter protein CIKS isoform X1 [Pteropus vampyrus]
ONT.350.1	--	--	--	K17511|7.07989e-09|tru:101064553|K17511 proto-oncogene tyrosine-protein kinase YRK [EC:2.7.10.2] | (RefSeq) fgr; FGR proto-oncogene, Src family tyrosine kinase	--	[T]	Signal transduction mechanisms	--	Tyrosine-protein kinase Fyn OS=Sus scrofa OX=9823 GN=FYN PE=2 SV=2	PREDICTED: tyrosine-protein kinase Yes [Equus przewalskii]
ONT.351.1	--	--	Molecular Function: nucleotide binding (GO:0000166);;	K10391|5.70434e-36|ssc:100154975|K10391 tubulin epsilon | (RefSeq) TUBE1; tubulin epsilon 1	--	[Z]	Cytoskeleton	--	--	PREDICTED: tubulin epsilon chain [Bubalus bubalis]
ONT.352.1	--	--	Biological Process: blood vessel development (GO:0001568);; Molecular Function: receptor binding (GO:0005102);; Cellular Component: basal lamina (GO:0005605);; Biological Process: regulation of cell adhesion (GO:0030155);; Biological Process: regulation of cell migration (GO:0030334);; Biological Process: regulation of embryonic development (GO:0045995);; Biological Process: brown fat cell differ…	K06241|1.85264e-52|chx:102177440|K06241 laminin, alpha 4 | (RefSeq) LAMA4; laminin subunit alpha 4	PI3K-Akt signaling pathway (ko04151);; Focal adhesion (ko04510);; ECM-receptor interaction (ko04512);; African trypanosomiasis (ko05143);; Toxoplasmosis (ko05145);; Amoebiasis (ko05146);; Pathways in cancer (ko05200);; Small cell lung cancer (ko05222)	[W]	Extracellular structures	--	--	laminin subunit alpha-4 [Odocoileus virginianus texanus]
ONT.353.1	--	--	--	K12561|4.14887e-08|bom:102280729|K12561 myristoylated alanine-rich C-kinase substrate | (RefSeq) MARCKS; myristoylated alanine rich protein kinase C substrate	Fc gamma R-mediated phagocytosis (ko04666);; MicroRNAs in cancer (ko05206)	--	--	--	--	PREDICTED: myristoylated alanine-rich C-kinase substrate [Erinaceus europaeus]
ONT.354.1	--	--	--	--	--	--	--	--	--	--
ONT.355.1	[BQ]	Chromatin structure and dynamics;; Secondary metabolites biosynthesis, transport and catabolism	Biological Process: chromatin organization (GO:0006325);; Molecular Function: transcription factor binding (GO:0008134);; Biological Process: positive regulation of macromolecule metabolic process (GO:0010604);; Biological Process: positive regulation of cellular metabolic process (GO:0031325);; Molecular Function: protein deacetylase activity (GO:0033558);; Cellular Component: protein complex (G…	K06067|2.08859e-174|xla:397868|K06067 histone deacetylase 1/2 [EC:3.5.1.98] | (RefSeq) hdac1.L, HD1, HDM, ab21, gon-10, hdac1-a, hdac1-b, hdac1a, rpd3, rpd3l1; histone deacetylase 1 L homeolog	Cell cycle (ko04110);; Notch signaling pathway (ko04330)	[B]	Chromatin structure and dynamics	Histone deacetylase domain;; Histone deacetylase domain;; Histone deacetylase domain	Histone deacetylase 1 OS=Bos taurus OX=9913 GN=HDAC1 PE=2 SV=1	PREDICTED: histone deacetylase 2 [Bos indicus]
ONT.355.2	[BQ]	Chromatin structure and dynamics;; Secondary metabolites biosynthesis, transport and catabolism	Molecular Function: DNA binding (GO:0003677);; Molecular Function: protein binding (GO:0005515);; Biological Process: chromatin organization (GO:0006325);; Biological Process: regulation of transcription, DNA-templated (GO:0006355);; Molecular Function: hydrolase activity (GO:0016787);; Cellular Component: nuclear lumen (GO:0031981);; Cellular Component: macromolecular complex (GO:0032991);; Biol…	K06067|2.81127e-107|ptr:462950|K06067 histone deacetylase 1/2 [EC:3.5.1.98] | (RefSeq) HDAC2; histone deacetylase 2	Cell cycle (ko04110);; Longevity regulating pathway - multiple species (ko04213);; Notch signaling pathway (ko04330);; Thyroid hormone signaling pathway (ko04919);; Huntington's disease (ko05016);; Alcoholism (ko05034);; Epstein-Barr virus infection (ko05169);; Pathways in cancer (ko05200);; Transcriptional misregulation in cancer (ko05202);; Viral carcinogenesis (ko05203);; Chronic myeloid leuke…	[B]	Chromatin structure and dynamics	Histone deacetylase domain;; Histone deacetylase domain;; Histone deacetylase domain	Histone deacetylase 1 OS=Bos taurus OX=9913 GN=HDAC1 PE=2 SV=1	PREDICTED: histone deacetylase 2 [Camelus dromedarius]
ONT.356.1	--	--	--	K08104|1.67838e-66|ssc:100155403|K08104 [heparan sulfate]-glucosamine 3-sulfotransferase 5 [EC:2.8.2.23] | (RefSeq) HS3ST5, HS3ST6; heparan sulfate-glucosamine 3-sulfotransferase 5	Glycosaminoglycan biosynthesis - heparan sulfate / heparin (ko00534)	[O]	Posttranslational modification, protein turnover, chaperones	--	--	heparan sulfate glucosamine 3-O-sulfotransferase 5 [Sus scrofa]
ONT.357.2	[D]	Cell cycle control, cell division, chromosome partitioning	Molecular Function: hydrolase activity (GO:0016787);;	--	--	[F]	Nucleotide transport and metabolism	5' nucleotidase family	5&apos;-nucleotidase domain-containing protein 1 OS=Bos taurus OX=9913 GN=NT5DC1 PE=2 SV=1	5&apos;-nucleotidase domain-containing protein 1 [Sus scrofa]
ONT.357.4	--	--	--	--	--	[F]	Nucleotide transport and metabolism	5' nucleotidase family;; 5' nucleotidase family	5&apos;-nucleotidase domain-containing protein 1 OS=Bos taurus OX=9913 GN=NT5DC1 PE=2 SV=1	5&apos;-nucleotidase domain-containing protein 1 isoform X2 [Delphinapterus leucas]
ONT.358.1	--	--	Cellular Component: nucleolus (GO:0005730);; Biological Process: nucleosome assembly (GO:0006334);; Molecular Function: enzyme binding (GO:0019899);;	K11284|1.7793e-101|ssc:100518283|K11284 TSPY-like 1 | (RefSeq) TSPYL1; TSPY like 1	--	[L]	Replication, recombination and repair	Nucleosome assembly protein (NAP)	Testis-specific Y-encoded-like protein 1 OS=Bos taurus OX=9913 GN=TSPYL1 PE=2 SV=1	LOW QUALITY PROTEIN: testis-specific Y-encoded-like protein 1 [Sus scrofa]
ONT.359.1	--	--	--	--	--	--	--	--	--	--
ONT.359.2	--	--	--	--	--	--	--	--	--	--
ONT.360.1	--	--	--	--	--	[S]	Function unknown	RWD domain	--	RWD domain-containing protein 1 isoform X1 [Physeter catodon]
ONT.360.2	--	--	--	--	--	[S]	Function unknown	RWD domain	--	PREDICTED: RWD domain-containing protein 1 [Balaenoptera acutorostrata scammoni]
ONT.360.3	--	--	--	--	--	[S]	Function unknown	RWD domain	--	PREDICTED: RWD domain-containing protein 1 [Balaenoptera acutorostrata scammoni]
ONT.360.4	--	--	--	--	--	[S]	Function unknown	RWD domain	--	RWD domain-containing protein 1 isoform X1 [Sus scrofa]
ONT.360.7	--	--	--	--	--	[S]	Function unknown	RWD domain	--	RWD domain-containing protein 1 isoform X1 [Physeter catodon]
ONT.360.10	--	--	--	--	--	[S]	Function unknown	--	--	PREDICTED: RWD domain-containing protein 1 isoform X1 [Myotis davidii]
ONT.360.11	--	--	--	--	--	[S]	Function unknown	--	--	hypothetical protein Celaphus_00009274 [Cervus elaphus hippelaphus]
ONT.360.12	--	--	--	--	--	--	--	--	--	--
ONT.360.13	--	--	--	--	--	--	--	--	--	--
ONT.361.1	--	--	--	--	--	--	--	--	--	--
ONT.362.1	[C]	Energy production and conversion	Molecular Function: malic enzyme activity (GO:0004470);; Molecular Function: binding (GO:0005488);; Cellular Component: mitochondrion (GO:0005739);; Biological Process: cellular process (GO:0009987);; Biological Process: single-organism metabolic process (GO:0044710);;	K00029|9.02109e-142|ssc:397538|K00029 malate dehydrogenase (oxaloacetate-decarboxylating)(NADP+) [EC:1.1.1.40] | (RefSeq) ME1; malic enzyme 1	Pyruvate metabolism (ko00620);; Carbon metabolism (ko01200)	[C]	Energy production and conversion	Malic enzyme, N-terminal domain;; Malic enzyme, N-terminal domain	NADP-dependent malic enzyme (Fragment) OS=Sus scrofa OX=9823 GN=ME1 PE=2 SV=1	RecName: Full=NADP-dependent malic enzyme; Short=NADP-ME; AltName: Full=Malic enzyme 1
ONT.362.4	--	--	--	--	--	--	--	--	--	--
ONT.362.5	[C]	Energy production and conversion	Molecular Function: malate dehydrogenase (decarboxylating) (NAD+) activity (GO:0004471);; Molecular Function: malate dehydrogenase (decarboxylating) (NADP+) activity (GO:0004473);; Cellular Component: mitochondrion (GO:0005739);; Cellular Component: cytosol (GO:0005829);; Biological Process: malate metabolic process (GO:0006108);; Biological Process: response to hormone (GO:0009725);; Molecular F…	K00029|3.51693e-82|ggo:101139689|K00029 malate dehydrogenase (oxaloacetate-decarboxylating)(NADP+) [EC:1.1.1.40] | (RefSeq) ME1; malic enzyme 1	Pyruvate metabolism (ko00620);; Carbon metabolism (ko01200)	[C]	Energy production and conversion	--	NADP-dependent malic enzyme (Fragment) OS=Sus scrofa OX=9823 GN=ME1 PE=2 SV=1	NADP-dependent malic enzyme-like protein, partial [Equus caballus]
ONT.362.7	--	--	Molecular Function: malic enzyme activity (GO:0004470);; Molecular Function: oxidoreductase activity, acting on the CH-OH group of donors, NAD or NADP as acceptor (GO:0016616);; Biological Process: cellular metabolic process (GO:0044237);; Biological Process: small molecule metabolic process (GO:0044281);; Cellular Component: cytoplasmic part (GO:0044444);; Biological Process: single-organism cel…	K00029|1.2096e-29|ssc:397538|K00029 malate dehydrogenase (oxaloacetate-decarboxylating)(NADP+) [EC:1.1.1.40] | (RefSeq) ME1; malic enzyme 1	Pyruvate metabolism (ko00620);; Carbon metabolism (ko01200)	[C]	Energy production and conversion	--	NADP-dependent malic enzyme (Fragment) OS=Sus scrofa OX=9823 GN=ME1 PE=2 SV=1	RecName: Full=NADP-dependent malic enzyme; Short=NADP-ME; AltName: Full=Malic enzyme 1
ONT.362.8	--	--	Molecular Function: malate dehydrogenase (decarboxylating) (NAD+) activity (GO:0004471);; Molecular Function: malate dehydrogenase (decarboxylating) (NADP+) activity (GO:0004473);; Cellular Component: mitochondrion (GO:0005739);; Cellular Component: cytosol (GO:0005829);; Biological Process: malate metabolic process (GO:0006108);; Molecular Function: oxaloacetate decarboxylase activity (GO:000894…	K00029|7.94335e-24|ssc:397538|K00029 malate dehydrogenase (oxaloacetate-decarboxylating)(NADP+) [EC:1.1.1.40] | (RefSeq) ME1; malic enzyme 1	Pyruvate metabolism (ko00620);; Carbon metabolism (ko01200)	[C]	Energy production and conversion	--	NADP-dependent malic enzyme (Fragment) OS=Sus scrofa OX=9823 GN=ME1 PE=2 SV=1	RecName: Full=NADP-dependent malic enzyme; Short=NADP-ME; AltName: Full=Malic enzyme 1
ONT.363.1	--	--	Biological Process: phosphorus metabolic process (GO:0006793);; Molecular Function: intramolecular transferase activity, phosphotransferases (GO:0016868);; Biological Process: multicellular organismal process (GO:0032501);; Biological Process: primary metabolic process (GO:0044238);; Biological Process: cellular biosynthetic process (GO:0044249);; Biological Process: single-organism process (GO:0…	K01836|3.64226e-145|ssc:100156015|K01836 phosphoacetylglucosamine mutase [EC:5.4.2.3] | (RefSeq) PGM3, AGM1, PAGM; phosphoglucomutase 3	Amino sugar and nucleotide sugar metabolism (ko00520)	[G]	Carbohydrate transport and metabolism	Phosphoglucomutase/phosphomannomutase, alpha/beta/alpha domain I	Phosphoacetylglucosamine mutase OS=Sus scrofa OX=9823 GN=PGM3 PE=1 SV=2	RecName: Full=Phosphoacetylglucosamine mutase; Short=PAGM; Short=PGlcNAc mutase; AltName: Full=Acetylglucosamine phosphomutase; AltName: Full=N-acetylglucosamine-phosphate mutase; AltName: Full=Phosphoglucomutase-3; Short=PGM 3
ONT.363.2	--	--	Molecular Function: intramolecular transferase activity, phosphotransferases (GO:0016868);; Biological Process: cellular metabolic process (GO:0044237);; Biological Process: primary metabolic process (GO:0044238);; Biological Process: single-organism process (GO:0044699);; Biological Process: carbohydrate derivative metabolic process (GO:1901135);;	K01836|2.07808e-113|aml:100464264|K01836 phosphoacetylglucosamine mutase [EC:5.4.2.3] | (RefSeq) PGM3; phosphoglucomutase 3	Amino sugar and nucleotide sugar metabolism (ko00520)	[G]	Carbohydrate transport and metabolism	--	Phosphoacetylglucosamine mutase OS=Sus scrofa OX=9823 GN=PGM3 PE=1 SV=2	PREDICTED: phosphoacetylglucosamine mutase [Chrysochloris asiatica]
ONT.363.3	--	--	Biological Process: phosphorus metabolic process (GO:0006793);; Molecular Function: intramolecular transferase activity, phosphotransferases (GO:0016868);; Biological Process: multicellular organismal process (GO:0032501);; Biological Process: primary metabolic process (GO:0044238);; Biological Process: cellular biosynthetic process (GO:0044249);; Biological Process: single-organism process (GO:0…	K01836|0|hgl:101717718|K01836 phosphoacetylglucosamine mutase [EC:5.4.2.3] | (RefSeq) Pgm3; phosphoglucomutase 3	Amino sugar and nucleotide sugar metabolism (ko00520)	[G]	Carbohydrate transport and metabolism	Phosphoglucomutase/phosphomannomutase, C-terminal domain;; Phosphoglucomutase/phosphomannomutase, alpha/beta/alpha domain I;; Phosphoglucomutase/phosphomannomutase, alpha/beta/alpha domain I	Phosphoacetylglucosamine mutase OS=Sus scrofa OX=9823 GN=PGM3 PE=1 SV=2	phosphoacetylglucosamine mutase isoform X2 [Trichechus manatus latirostris]
ONT.363.4	--	--	--	--	--	--	--	--	--	--
ONT.364.1	--	--	--	--	--	[K]	Transcription	--	--	protein dopey-1 isoform X2 [Sus scrofa]
ONT.365.1	--	--	--	--	--	--	--	--	--	--
ONT.366.1	--	--	--	K20803|1.87166e-82|ptg:102964163|K20803 ubiquitin-protein ligase E3 D [EC:2.3.2.26] | (RefSeq) UBE3D; ubiquitin protein ligase E3D	--	[S]	Function unknown	HECT-like Ubiquitin-conjugating enzyme (E2)-binding	E3 ubiquitin-protein ligase E3D OS=Bos taurus OX=9913 GN=UBE3D PE=2 SV=1	PREDICTED: E3 ubiquitin-protein ligase E3D [Hipposideros armiger]
ONT.366.2	--	--	--	K20803|2.1944e-102|ssc:100739214|K20803 ubiquitin-protein ligase E3 D [EC:2.3.2.26] | (RefSeq) UBE3D; ubiquitin protein ligase E3D	--	[S]	Function unknown	HECT-like Ubiquitin-conjugating enzyme (E2)-binding;; HECT-like Ubiquitin-conjugating enzyme (E2)-binding	E3 ubiquitin-protein ligase E3D OS=Pongo abelii OX=9601 GN=UBE3D PE=2 SV=1	E3 ubiquitin-protein ligase E3D isoform X1 [Equus caballus]
ONT.366.4	--	--	--	--	--	--	--	--	--	E3 ubiquitin-protein ligase E3D isoform X3 [Sus scrofa]
ONT.367.1	--	--	Biological Process: negative regulation of protein phosphorylation (GO:0001933);; Cellular Component: intracellular part (GO:0044424);;	--	--	[S]	Function unknown	Regulator of chromosome condensation (RCC1) repeat;; Regulator of chromosome condensation (RCC1) repeat	--	inhibitor of Bruton tyrosine kinase [Odocoileus virginianus texanus]
ONT.368.1	--	--	--	--	--	--	--	--	--	--
ONT.371.2	--	--	Cellular Component: chromatin (GO:0000785);; Cellular Component: nucleus (GO:0005634);; Molecular Function: nucleosomal DNA binding (GO:0031492);; Biological Process: positive regulation of transcription from RNA polymerase II promoter (GO:0045944);; Biological Process: positive regulation of sequence-specific DNA binding transcription factor activity (GO:0051091);; Biological Process: regulation…	K11301|6.23736e-43|bacu:103012262|K11301 high-mobility group nucleosome-binding domain-containing protein 3 | (RefSeq) HMGN3; high mobility group nucleosomal binding domain 3	--	--	--	HMG14 and HMG17;; HMG14 and HMG17	High mobility group nucleosome-binding domain-containing protein 3 OS=Pongo abelii OX=9601 GN=HMGN3 PE=3 SV=1	PREDICTED: high mobility group nucleosome-binding domain-containing protein 3 isoform X3 [Balaenoptera acutorostrata scammoni]
ONT.371.3	--	--	Cellular Component: chromatin (GO:0000785);; Cellular Component: nucleus (GO:0005634);; Molecular Function: nucleosomal DNA binding (GO:0031492);; Biological Process: positive regulation of transcription from RNA polymerase II promoter (GO:0045944);; Biological Process: positive regulation of sequence-specific DNA binding transcription factor activity (GO:0051091);; Biological Process: regulation…	K11301|3.40512e-31|bacu:103012262|K11301 high-mobility group nucleosome-binding domain-containing protein 3 | (RefSeq) HMGN3; high mobility group nucleosomal binding domain 3	--	--	--	HMG14 and HMG17	High mobility group nucleosome-binding domain-containing protein 3 OS=Bos taurus OX=9913 GN=HMGN3 PE=2 SV=1	high mobility group nucleosome-binding domain-containing protein 3 isoform X2 [Neomonachus schauinslandi]
ONT.371.5	--	--	Cellular Component: chromatin (GO:0000785);; Cellular Component: nucleus (GO:0005634);; Molecular Function: nucleosomal DNA binding (GO:0031492);; Biological Process: positive regulation of transcription from RNA polymerase II promoter (GO:0045944);; Biological Process: positive regulation of sequence-specific DNA binding transcription factor activity (GO:0051091);; Biological Process: regulation…	K11301|1.26106e-23|pale:102877806|K11301 high-mobility group nucleosome-binding domain-containing protein 3 | (RefSeq) HMGN3; high mobility group nucleosomal binding domain 3	--	--	--	HMG14 and HMG17	High mobility group nucleosome-binding domain-containing protein 3 OS=Pongo abelii OX=9601 GN=HMGN3 PE=3 SV=1	high mobility group nucleosome-binding domain-containing protein 3 isoform X2 [Equus caballus]
ONT.371.6	--	--	Molecular Function: binding (GO:0005488);; Biological Process: regulation of transcription, DNA-templated (GO:0006355);;	K11301|5.58831e-26|bacu:103012262|K11301 high-mobility group nucleosome-binding domain-containing protein 3 | (RefSeq) HMGN3; high mobility group nucleosomal binding domain 3	--	--	--	HMG14 and HMG17	High mobility group nucleosome-binding domain-containing protein 3 OS=Bos taurus OX=9913 GN=HMGN3 PE=2 SV=1	high mobility group nucleosome-binding domain-containing protein 3 isoform X2 [Canis lupus familiaris]
ONT.371.9	--	--	Cellular Component: chromatin (GO:0000785);; Cellular Component: nucleus (GO:0005634);; Molecular Function: nucleosomal DNA binding (GO:0031492);; Biological Process: positive regulation of transcription from RNA polymerase II promoter (GO:0045944);; Biological Process: positive regulation of sequence-specific DNA binding transcription factor activity (GO:0051091);; Biological Process: regulation…	K11301|3.37015e-48|ptg:102958763|K11301 high-mobility group nucleosome-binding domain-containing protein 3 | (RefSeq) HMGN3; high mobility group nucleosomal binding domain 3	--	--	--	HMG14 and HMG17	High mobility group nucleosome-binding domain-containing protein 3 OS=Pongo abelii OX=9601 GN=HMGN3 PE=3 SV=1	high mobility group nucleosome-binding domain-containing protein 3 isoform X1 [Sus scrofa]
ONT.371.10	--	--	Cellular Component: chromatin (GO:0000785);; Cellular Component: nucleus (GO:0005634);; Molecular Function: nucleosomal DNA binding (GO:0031492);; Biological Process: positive regulation of transcription from RNA polymerase II promoter (GO:0045944);; Biological Process: positive regulation of sequence-specific DNA binding transcription factor activity (GO:0051091);; Biological Process: regulation…	K11301|1.70439e-35|bacu:103012262|K11301 high-mobility group nucleosome-binding domain-containing protein 3 | (RefSeq) HMGN3; high mobility group nucleosomal binding domain 3	--	--	--	--	High mobility group nucleosome-binding domain-containing protein 3 OS=Pongo abelii OX=9601 GN=HMGN3 PE=3 SV=1	high mobility group nucleosome-binding domain-containing protein 3 isoform X1 [Canis lupus familiaris]
ONT.371.11	--	--	Cellular Component: chromatin (GO:0000785);; Cellular Component: nucleus (GO:0005634);; Molecular Function: nucleosomal DNA binding (GO:0031492);; Biological Process: positive regulation of transcription from RNA polymerase II promoter (GO:0045944);; Biological Process: positive regulation of sequence-specific DNA binding transcription factor activity (GO:0051091);; Biological Process: regulation…	K11301|5.47145e-22|bacu:103012262|K11301 high-mobility group nucleosome-binding domain-containing protein 3 | (RefSeq) HMGN3; high mobility group nucleosomal binding domain 3	--	--	--	--	High mobility group nucleosome-binding domain-containing protein 3 OS=Bos taurus OX=9913 GN=HMGN3 PE=2 SV=1	high mobility group nucleosome-binding domain-containing protein 3 isoform X1 [Neomonachus schauinslandi]
ONT.371.13	--	--	Biological Process: regulation of transcription, DNA-templated (GO:0006355);;	K11301|1.2829e-17|lve:103082497|K11301 high-mobility group nucleosome-binding domain-containing protein 3 | (RefSeq) HMGN3; high mobility group nucleosomal binding domain 3	--	--	--	--	--	PREDICTED: high mobility group nucleosome-binding domain-containing protein 3 isoform X3 [Equus asinus]
ONT.371.14	--	--	--	K11301|5.04899e-15|bacu:103012262|K11301 high-mobility group nucleosome-binding domain-containing protein 3 | (RefSeq) HMGN3; high mobility group nucleosomal binding domain 3	--	--	--	--	High mobility group nucleosome-binding domain-containing protein 3 OS=Bos taurus OX=9913 GN=HMGN3 PE=2 SV=1	hypothetical protein CB1_000591023 [Camelus ferus]
ONT.371.16	--	--	Cellular Component: chromatin (GO:0000785);; Cellular Component: nucleus (GO:0005634);; Molecular Function: nucleosomal DNA binding (GO:0031492);; Biological Process: positive regulation of transcription from RNA polymerase II promoter (GO:0045944);; Biological Process: positive regulation of sequence-specific DNA binding transcription factor activity (GO:0051091);; Biological Process: regulation…	K11301|2.63991e-28|bacu:103012262|K11301 high-mobility group nucleosome-binding domain-containing protein 3 | (RefSeq) HMGN3; high mobility group nucleosomal binding domain 3	--	--	--	HMG14 and HMG17	High mobility group nucleosome-binding domain-containing protein 3 OS=Bos taurus OX=9913 GN=HMGN3 PE=2 SV=1	PREDICTED: high mobility group nucleosome-binding domain-containing protein 3 isoform X2 [Odobenus rosmarus divergens]
ONT.371.17	--	--	Cellular Component: chromatin (GO:0000785);; Cellular Component: nucleus (GO:0005634);; Molecular Function: nucleosomal DNA binding (GO:0031492);; Biological Process: positive regulation of transcription from RNA polymerase II promoter (GO:0045944);; Biological Process: positive regulation of sequence-specific DNA binding transcription factor activity (GO:0051091);; Biological Process: regulation…	K11301|6.85007e-22|pale:102877806|K11301 high-mobility group nucleosome-binding domain-containing protein 3 | (RefSeq) HMGN3; high mobility group nucleosomal binding domain 3	--	--	--	HMG14 and HMG17	High mobility group nucleosome-binding domain-containing protein 3 OS=Pongo abelii OX=9601 GN=HMGN3 PE=3 SV=1	high mobility group nucleosome-binding domain-containing protein 3 isoform X2 [Equus caballus]
ONT.371.18	--	--	Cellular Component: chromatin (GO:0000785);; Cellular Component: nucleus (GO:0005634);; Molecular Function: nucleosomal DNA binding (GO:0031492);; Biological Process: positive regulation of transcription from RNA polymerase II promoter (GO:0045944);; Biological Process: positive regulation of sequence-specific DNA binding transcription factor activity (GO:0051091);; Biological Process: regulation…	K11301|3.82113e-30|bacu:103012262|K11301 high-mobility group nucleosome-binding domain-containing protein 3 | (RefSeq) HMGN3; high mobility group nucleosomal binding domain 3	--	--	--	HMG14 and HMG17	High mobility group nucleosome-binding domain-containing protein 3 OS=Pongo abelii OX=9601 GN=HMGN3 PE=3 SV=1	high mobility group nucleosome-binding domain-containing protein 3 isoform X1 [Neomonachus schauinslandi]
ONT.371.19	--	--	Cellular Component: chromatin (GO:0000785);; Cellular Component: nucleus (GO:0005634);; Molecular Function: nucleosomal DNA binding (GO:0031492);; Biological Process: positive regulation of transcription from RNA polymerase II promoter (GO:0045944);; Biological Process: positive regulation of sequence-specific DNA binding transcription factor activity (GO:0051091);; Biological Process: regulation…	K11301|8.82026e-46|bacu:103012262|K11301 high-mobility group nucleosome-binding domain-containing protein 3 | (RefSeq) HMGN3; high mobility group nucleosomal binding domain 3	--	--	--	--	High mobility group nucleosome-binding domain-containing protein 3 OS=Pongo abelii OX=9601 GN=HMGN3 PE=3 SV=1	high mobility group nucleosome-binding domain-containing protein 3 isoform X1 [Neomonachus schauinslandi]
ONT.371.20	--	--	Molecular Function: chromatin binding (GO:0003682);; Biological Process: regulation of transcription from RNA polymerase II promoter (GO:0006357);; Cellular Component: intracellular organelle (GO:0043229);; Biological Process: positive regulation of biological process (GO:0048518);;	K11301|1.09754e-18|umr:103657416|K11301 high-mobility group nucleosome-binding domain-containing protein 3 | (RefSeq) HMGN3; high mobility group nucleosomal binding domain 3	--	--	--	--	High mobility group nucleosome-binding domain-containing protein 3 OS=Pongo abelii OX=9601 GN=HMGN3 PE=3 SV=1	PREDICTED: high mobility group nucleosome-binding domain-containing protein 3 isoform X2 [Ursus maritimus]
ONT.371.22	--	--	--	--	--	--	--	--	--	--
ONT.371.23	--	--	--	--	--	--	--	--	--	--
ONT.371.25	--	--	Cellular Component: chromatin (GO:0000785);; Cellular Component: nucleus (GO:0005634);; Molecular Function: nucleosomal DNA binding (GO:0031492);; Biological Process: positive regulation of transcription from RNA polymerase II promoter (GO:0045944);; Biological Process: positive regulation of sequence-specific DNA binding transcription factor activity (GO:0051091);; Biological Process: regulation…	K11301|7.817e-30|ptg:102958763|K11301 high-mobility group nucleosome-binding domain-containing protein 3 | (RefSeq) HMGN3; high mobility group nucleosomal binding domain 3	--	--	--	HMG14 and HMG17	High mobility group nucleosome-binding domain-containing protein 3 OS=Pongo abelii OX=9601 GN=HMGN3 PE=3 SV=1	high mobility group nucleosome-binding domain-containing protein 3 isoform X2 [Sus scrofa]
ONT.371.27	--	--	Biological Process: regulation of cellular process (GO:0050794);;	K11301|1.8707e-16|pale:102877806|K11301 high-mobility group nucleosome-binding domain-containing protein 3 | (RefSeq) HMGN3; high mobility group nucleosomal binding domain 3	--	--	--	HMG14 and HMG17	High mobility group nucleosome-binding domain-containing protein 3 OS=Pongo abelii OX=9601 GN=HMGN3 PE=3 SV=1	PREDICTED: high mobility group nucleosome-binding domain-containing protein 3 isoform X1 [Pteropus alecto]
ONT.371.31	--	--	Cellular Component: chromatin (GO:0000785);; Cellular Component: nucleus (GO:0005634);; Molecular Function: nucleosomal DNA binding (GO:0031492);; Biological Process: positive regulation of transcription from RNA polymerase II promoter (GO:0045944);; Biological Process: positive regulation of sequence-specific DNA binding transcription factor activity (GO:0051091);; Biological Process: regulation…	K11301|2.78464e-13|ptg:102958763|K11301 high-mobility group nucleosome-binding domain-containing protein 3 | (RefSeq) HMGN3; high mobility group nucleosomal binding domain 3	--	--	--	--	--	high mobility group nucleosome-binding domain-containing protein 3 isoform X2 [Sus scrofa]
ONT.372.1	--	--	Cellular Component: intracellular (GO:0005622);; Biological Process: I-kappaB kinase/NF-kappaB signaling (GO:0007249);;	--	--	--	--	Protein of unknown function (DUF541)	--	interleukin-1 receptor-associated kinase 1-binding protein 1 isoform X1 [Sus scrofa]
ONT.373.1	--	--	--	--	--	--	--	--	--	--
ONT.375.1	--	--	--	--	--	--	--	--	--	--
ONT.376.1	--	--	--	--	--	--	--	--	--	filamin-A-interacting protein 1 isoform X2 [Sus scrofa]
ONT.376.2	--	--	--	--	--	--	--	--	--	Filamin-A-interacting protein 1 [Myotis brandtii]
ONT.376.3	--	--	--	--	--	--	--	Cortactin-binding protein-2	--	filamin-A-interacting protein 1 isoform X2 [Sus scrofa]
ONT.376.4	--	--	--	--	--	--	--	--	--	filamin-A-interacting protein 1 isoform X2 [Canis lupus familiaris]
ONT.376.5	--	--	--	--	--	--	--	--	--	cullin-7 isoform X1 [Sus scrofa]
ONT.377.1	--	--	--	--	--	--	--	--	--	PREDICTED: filamin-A-interacting protein 1 isoform X1 [Lipotes vexillifer]
ONT.378.1	--	--	Molecular Function: SNARE binding (GO:0000149);; Molecular Function: nucleic acid binding (GO:0003676);; Molecular Function: transcription factor activity, sequence-specific DNA binding (GO:0003700);; Molecular Function: SNAP receptor activity (GO:0005484);; Biological Process: regulation of transcription, DNA-templated (GO:0006355);; Biological Process: exocytosis (GO:0006887);; Biological Proce…	--	--	--	--	--	--	lysosome-associated membrane glycoprotein 3 isoform X1 [Sus scrofa]
ONT.378.2	--	--	Cellular Component: intracellular organelle (GO:0043229);; Biological Process: single-organism cellular process (GO:0044763);; Biological Process: system development (GO:0048731);;	--	--	--	--	--	--	cullin-7 isoform X1 [Sus scrofa]
ONT.379.1	--	--	Cellular Component: lysosomal membrane (GO:0005765);; Cellular Component: integral component of membrane (GO:0016021);; Cellular Component: alveolar lamellar body membrane (GO:0097233);;	--	--	--	--	--	--	lysosome-associated membrane glycoprotein 3 isoform X1 [Sus scrofa]
ONT.380.1	--	--	--	--	--	--	--	--	--	--
ONT.381.1	--	--	--	--	--	--	--	--	--	--
ONT.382.1	--	--	--	--	--	--	--	--	--	vesicle-trafficking protein SEC22a isoform X3 [Sus scrofa]
ONT.382.2	--	--	--	--	--	--	--	--	--	vesicle-trafficking protein SEC22a isoform X4 [Sus scrofa]
ONT.383.1	--	--	--	--	--	--	--	--	--	--
ONT.384.1	--	--	Cellular Component: endomembrane system (GO:0012505);; Cellular Component: membrane (GO:0016020);; Cellular Component: membrane-bounded organelle (GO:0043227);; Cellular Component: intracellular organelle (GO:0043229);; Cellular Component: cytoplasmic part (GO:0044444);; Biological Process: phospholipid translocation (GO:0045332);;	--	--	[DKT]	Cell cycle control, cell division, chromosome partitioning;; Transcription;; Signal transduction mechanisms	--	Cell cycle control protein 50A OS=Bos taurus OX=9913 GN=TMEM30A PE=1 SV=1	cell cycle control protein 50A isoform X2 [Sus scrofa]
ONT.384.2	--	--	Cellular Component: endoplasmic reticulum (GO:0005783);; Biological Process: drug transmembrane transport (GO:0006855);; Biological Process: positive regulation of neuron projection development (GO:0010976);; Cellular Component: integral component of membrane (GO:0016021);; Biological Process: protein localization to endosome (GO:0036010);; Biological Process: phospholipid translocation (GO:00453…	--	--	[DKT]	Cell cycle control, cell division, chromosome partitioning;; Transcription;; Signal transduction mechanisms	LEM3 (ligand-effect modulator 3) family / CDC50 family;; LEM3 (ligand-effect modulator 3) family / CDC50 family;; LEM3 (ligand-effect modulator 3) family / CDC50 family	Cell cycle control protein 50A OS=Pongo abelii OX=9601 GN=TMEM30A PE=2 SV=1	cell cycle control protein 50A isoform X2 [Sus scrofa]
ONT.384.3	--	--	Biological Process: macromolecule localization (GO:0033036);; Biological Process: single-organism transport (GO:0044765);; Biological Process: biological regulation (GO:0065007);; Biological Process: organic substance transport (GO:0071702);;	--	--	[DKT]	Cell cycle control, cell division, chromosome partitioning;; Transcription;; Signal transduction mechanisms	LEM3 (ligand-effect modulator 3) family / CDC50 family;; LEM3 (ligand-effect modulator 3) family / CDC50 family	Cell cycle control protein 50A OS=Bos taurus OX=9913 GN=TMEM30A PE=1 SV=1	cell cycle control protein 50A isoform X1 [Sus scrofa]
ONT.384.7	--	--	Biological Process: macromolecule localization (GO:0033036);; Biological Process: single-organism transport (GO:0044765);; Biological Process: biological regulation (GO:0065007);; Biological Process: organic substance transport (GO:0071702);;	--	--	[DKT]	Cell cycle control, cell division, chromosome partitioning;; Transcription;; Signal transduction mechanisms	LEM3 (ligand-effect modulator 3) family / CDC50 family	Cell cycle control protein 50A OS=Bos taurus OX=9913 GN=TMEM30A PE=1 SV=1	cell cycle control protein 50A isoform X1 [Sus scrofa]
ONT.385.1	--	--	Cellular Component: mitochondrial inner membrane (GO:0005743);; Molecular Function: electron carrier activity (GO:0009055);; Cellular Component: membrane part (GO:0044425);;	K02270|2.20091e-24|ssc:100038000|K02270 cytochrome c oxidase subunit 7a | (RefSeq) COX7A2; COX7A2 protein	Oxidative phosphorylation (ko00190);; Cardiac muscle contraction (ko04260);; Non-alcoholic fatty liver disease (NAFLD) (ko04932);; Alzheimer's disease (ko05010);; Parkinson's disease (ko05012);; Huntington's disease (ko05016)	--	--	Cytochrome c oxidase subunit VII	Cytochrome c oxidase subunit 7A2, mitochondrial OS=Bos taurus OX=9913 GN=COX7A2 PE=1 SV=3	cytochrome c oxidase subunit 7A2, mitochondrial [Sus scrofa]
ONT.385.3	--	--	Molecular Function: cytochrome-c oxidase activity (GO:0004129);; Cellular Component: mitochondrial respiratory chain (GO:0005746);; Cellular Component: integral component of membrane (GO:0016021);; Biological Process: hydrogen ion transmembrane transport (GO:1902600);;	K02270|2.56206e-38|ssc:100038000|K02270 cytochrome c oxidase subunit 7a | (RefSeq) COX7A2; COX7A2 protein	Oxidative phosphorylation (ko00190);; Cardiac muscle contraction (ko04260);; Non-alcoholic fatty liver disease (NAFLD) (ko04932);; Alzheimer's disease (ko05010);; Parkinson's disease (ko05012);; Huntington's disease (ko05016)	--	--	--	Cytochrome c oxidase subunit 7A2, mitochondrial OS=Bos taurus OX=9913 GN=COX7A2 PE=1 SV=3	cytochrome c oxidase subunit 7A2, mitochondrial [Sus scrofa]
ONT.385.4	--	--	Cellular Component: mitochondrion (GO:0005739);; Cellular Component: membrane (GO:0016020);;	K02270|1.14776e-14|ssc:100038000|K02270 cytochrome c oxidase subunit 7a | (RefSeq) COX7A2; COX7A2 protein	Oxidative phosphorylation (ko00190);; Cardiac muscle contraction (ko04260);; Non-alcoholic fatty liver disease (NAFLD) (ko04932);; Alzheimer's disease (ko05010);; Parkinson's disease (ko05012);; Huntington's disease (ko05016)	--	--	--	Cytochrome c oxidase subunit 7A2, mitochondrial OS=Bos taurus OX=9913 GN=COX7A2 PE=1 SV=3	hypothetical protein M91_01459, partial [Bos mutus]
ONT.385.5	--	--	Molecular Function: electron carrier activity (GO:0009055);;	K02270|1.35307e-11|ssc:100038000|K02270 cytochrome c oxidase subunit 7a | (RefSeq) COX7A2; COX7A2 protein	Oxidative phosphorylation (ko00190);; Cardiac muscle contraction (ko04260);; Non-alcoholic fatty liver disease (NAFLD) (ko04932);; Alzheimer's disease (ko05010);; Parkinson's disease (ko05012);; Huntington's disease (ko05016)	--	--	--	Cytochrome c oxidase subunit 7A2, mitochondrial OS=Bos taurus OX=9913 GN=COX7A2 PE=1 SV=3	hypothetical protein M91_01459, partial [Bos mutus]
ONT.386.1	--	--	Cellular Component: extracellular space (GO:0005615);; Cellular Component: extracellular matrix (GO:0031012);; Biological Process: endodermal cell differentiation (GO:0035987);; Cellular Component: extracellular exosome (GO:0070062);;	--	--	--	--	--	--	collagen alpha-1(XII) chain isoform X1 [Sus scrofa]
ONT.387.1	--	--	--	--	--	--	--	--	--	CREB-regulated transcription coactivator 2 isoform X3 [Sus scrofa]
ONT.387.2	--	--	--	--	--	--	--	--	--	LOW QUALITY PROTEIN: zinc finger protein 211 [Sus scrofa]
ONT.389.1	[J]	Translation, ribosomal structure and biogenesis	Molecular Function: RNA binding (GO:0003723);; Molecular Function: protein binding (GO:0005515);; Cellular Component: cytoplasm (GO:0005737);; Biological Process: cellular process (GO:0009987);; Cellular Component: membrane-bounded organelle (GO:0043227);; Cellular Component: intracellular organelle (GO:0043229);;	K03231|7.62229e-113|pss:102446534|K03231 elongation factor 1-alpha | (RefSeq) EEF1A1, PsEF1a; eukaryotic translation elongation factor 1 alpha 1	RNA transport (ko03013)	[J]	Translation, ribosomal structure and biogenesis	Elongation factor Tu GTP binding domain;; Elongation factor Tu C-terminal domain	Elongation factor 1-alpha 1 OS=Oryctolagus cuniculus OX=9986 GN=EEF1A1 PE=1 SV=1	PREDICTED: elongation factor 1-alpha 1 [Orcinus orca]
ONT.389.2	[J]	Translation, ribosomal structure and biogenesis	--	K03231|1.71361e-67|xtr:549446|K03231 elongation factor 1-alpha | (RefSeq) eef1a1, EF1alpha, ccs-3, ccs3, eef-1, eef1a, eef1a-1, eef1a-s, ef-tu, ef1a, graf-1ef, hngc:16303, leng7, pti1; eukaryotic translation elongation factor 1 alpha 1	RNA transport (ko03013)	[J]	Translation, ribosomal structure and biogenesis	--	Elongation factor 1-alpha 2 OS=Oryctolagus cuniculus OX=9986 GN=EEF1A2 PE=1 SV=1	PREDICTED: elongation factor 1-alpha, somatic form-like [Ceratotherium simum simum]
ONT.389.7	[J]	Translation, ribosomal structure and biogenesis	Molecular Function: protein binding (GO:0005515);; Cellular Component: organelle (GO:0043226);; Cellular Component: intracellular part (GO:0044424);; Molecular Function: organic cyclic compound binding (GO:0097159);; Molecular Function: heterocyclic compound binding (GO:1901363);;	--	--	[J]	Translation, ribosomal structure and biogenesis	Elongation factor Tu GTP binding domain	Elongation factor 1-alpha 1 OS=Oryctolagus cuniculus OX=9986 GN=EEF1A1 PE=1 SV=1	PREDICTED: elongation factor 1-alpha 1 [Orcinus orca]
ONT.389.8	[J]	Translation, ribosomal structure and biogenesis	Molecular Function: protein binding (GO:0005515);; Cellular Component: organelle (GO:0043226);; Cellular Component: intracellular part (GO:0044424);; Molecular Function: organic cyclic compound binding (GO:0097159);; Molecular Function: heterocyclic compound binding (GO:1901363);;	K03231|1.40689e-101|oas:105613550|K03231 elongation factor 1-alpha | (RefSeq) elongation factor 1-alpha 1-like	RNA transport (ko03013);; Legionellosis (ko05134)	[J]	Translation, ribosomal structure and biogenesis	Elongation factor Tu GTP binding domain	Elongation factor 1-alpha 1 OS=Oryctolagus cuniculus OX=9986 GN=EEF1A1 PE=1 SV=1	PREDICTED: elongation factor 1-alpha 1-like isoform X1 [Ovis aries]
ONT.389.11	[J]	Translation, ribosomal structure and biogenesis	Molecular Function: protein binding (GO:0005515);; Cellular Component: organelle (GO:0043226);; Cellular Component: intracellular part (GO:0044424);; Molecular Function: organic cyclic compound binding (GO:0097159);; Molecular Function: heterocyclic compound binding (GO:1901363);;	K03231|1.66917e-86|umr:103677048|K03231 elongation factor 1-alpha | (RefSeq) elongation factor 1-alpha 1-like	RNA transport (ko03013);; Legionellosis (ko05134)	[J]	Translation, ribosomal structure and biogenesis	Elongation factor Tu C-terminal domain	Elongation factor 1-alpha 1 OS=Oryctolagus cuniculus OX=9986 GN=EEF1A1 PE=1 SV=1	PREDICTED: LOW QUALITY PROTEIN: elongation factor 1-alpha 1-like [Ursus maritimus]
ONT.389.12	[J]	Translation, ribosomal structure and biogenesis	Molecular Function: tRNA binding (GO:0000049);; Molecular Function: translation elongation factor activity (GO:0003746);; Molecular Function: GTPase activity (GO:0003924);; Molecular Function: GTP binding (GO:0005525);; Cellular Component: extracellular space (GO:0005615);; Cellular Component: nucleolus (GO:0005730);; Cellular Component: cytosol (GO:0005829);; Biological Process: translational el…	K03231|0|tup:102493820|K03231 elongation factor 1-alpha | (RefSeq) EEF1A1; eukaryotic translation elongation factor 1 alpha 1	RNA transport (ko03013);; Legionellosis (ko05134)	[J]	Translation, ribosomal structure and biogenesis	Elongation factor Tu C-terminal domain;; Elongation factor Tu GTP binding domain;; Elongation factor Tu domain 2	Elongation factor 1-alpha 1 OS=Oryctolagus cuniculus OX=9986 GN=EEF1A1 PE=1 SV=1	PREDICTED: elongation factor 1-alpha 1-like [Ovis aries]
ONT.390.1	--	--	--	--	--	--	--	--	--	--
ONT.391.1	[J]	Translation, ribosomal structure and biogenesis	Biological Process: tRNA processing (GO:0008033);; Molecular Function: organic cyclic compound binding (GO:0097159);; Molecular Function: heterocyclic compound binding (GO:1901363);;	K03495|0|cfa:474967|K03495 tRNA uridine 5-carboxymethylaminomethyl modification enzyme | (RefSeq) MTO1; mitochondrial tRNA translation optimization 1	--	[J]	Translation, ribosomal structure and biogenesis	Glucose inhibited division protein A;; Glucose inhibited division protein A;; GidA associated domain;; Glucose inhibited division protein A;; GidA associated domain	Protein MTO1 homolog, mitochondrial OS=Macaca fascicularis OX=9541 GN=MTO1 PE=2 SV=1	PREDICTED: protein MTO1 homolog, mitochondrial isoform X1 [Ceratotherium simum simum]
ONT.392.1	--	--	Cellular Component: intracellular organelle (GO:0043229);; Biological Process: single-organism cellular process (GO:0044763);; Biological Process: system development (GO:0048731);;	--	--	--	--	--	--	cullin-7 isoform X1 [Sus scrofa]
ONT.393.1	--	--	--	--	--	--	--	--	--	--
ONT.394.1	--	--	--	--	--	--	--	--	--	--
ONT.395.1	--	--	--	--	--	--	--	--	--	--
ONT.396.1	--	--	--	K20124|2.08237e-75|ssc:100519694|K20124 proline-serine-threonine phosphatase interacting protein 2 | (RefSeq) PSTPIP2; proline-serine-threonine phosphatase interacting protein 2	--	[D]	Cell cycle control, cell division, chromosome partitioning	--	--	proline-serine-threonine phosphatase-interacting protein 2 [Sus scrofa]
ONT.396.14	--	--	--	K20124|2.30668e-103|ssc:100519694|K20124 proline-serine-threonine phosphatase interacting protein 2 | (RefSeq) PSTPIP2; proline-serine-threonine phosphatase interacting protein 2	--	[D]	Cell cycle control, cell division, chromosome partitioning	--	--	proline-serine-threonine phosphatase-interacting protein 2 [Sus scrofa]
ONT.396.7	--	--	Molecular Function: actin binding (GO:0003779);; Cellular Component: cytosol (GO:0005829);; Cellular Component: cytoskeleton (GO:0005856);; Biological Process: cytoskeleton organization (GO:0007010);; Cellular Component: membrane (GO:0016020);; Biological Process: cell migration (GO:0016477);;	K20124|0|ssc:100519694|K20124 proline-serine-threonine phosphatase interacting protein 2 | (RefSeq) PSTPIP2; proline-serine-threonine phosphatase interacting protein 2	--	[D]	Cell cycle control, cell division, chromosome partitioning	--	--	proline-serine-threonine phosphatase-interacting protein 2 [Sus scrofa]
ONT.396.13	--	--	Biological Process: cellular process (GO:0009987);; Cellular Component: intracellular part (GO:0044424);;	K20124|7.25402e-140|ssc:100519694|K20124 proline-serine-threonine phosphatase interacting protein 2 | (RefSeq) PSTPIP2; proline-serine-threonine phosphatase interacting protein 2	--	[D]	Cell cycle control, cell division, chromosome partitioning	--	--	proline-serine-threonine phosphatase-interacting protein 2 [Sus scrofa]
ONT.396.10	--	--	--	K20124|8.38665e-59|apla:101796041|K20124 proline-serine-threonine phosphatase interacting protein 2 | (RefSeq) PSTPIP2; proline-serine-threonine phosphatase interacting protein 2	--	[D]	Cell cycle control, cell division, chromosome partitioning	--	--	PREDICTED: proline-serine-threonine phosphatase-interacting protein 2 [Ochotona princeps]
ONT.396.15	--	--	--	K20124|5.1306e-54|ssc:100519694|K20124 proline-serine-threonine phosphatase interacting protein 2 | (RefSeq) PSTPIP2; proline-serine-threonine phosphatase interacting protein 2	--	[D]	Cell cycle control, cell division, chromosome partitioning	--	--	PREDICTED: proline-serine-threonine phosphatase-interacting protein 2 [Hipposideros armiger]
ONT.396.17	--	--	--	K20124|5.5795e-109|ssc:100519694|K20124 proline-serine-threonine phosphatase interacting protein 2 | (RefSeq) PSTPIP2; proline-serine-threonine phosphatase interacting protein 2	--	[D]	Cell cycle control, cell division, chromosome partitioning	--	--	proline-serine-threonine phosphatase-interacting protein 2 [Sus scrofa]
ONT.396.19	--	--	Molecular Function: actin binding (GO:0003779);; Cellular Component: cytosol (GO:0005829);; Cellular Component: cytoskeleton (GO:0005856);; Biological Process: cytoskeleton organization (GO:0007010);; Cellular Component: membrane (GO:0016020);; Biological Process: cell migration (GO:0016477);;	K20124|5.00614e-60|mcc:701032|K20124 proline-serine-threonine phosphatase interacting protein 2 | (RefSeq) PSTPIP2; proline-serine-threonine phosphatase interacting protein 2	--	[D]	Cell cycle control, cell division, chromosome partitioning	Fes/CIP4, and EFC/F-BAR homology domain	F-BAR domain only protein 2 OS=Pongo abelii OX=9601 GN=FCHO2 PE=2 SV=1	proline-serine-threonine phosphatase-interacting protein 2 isoform X1 [Felis catus]
ONT.396.20	--	--	Molecular Function: actin binding (GO:0003779);; Cellular Component: cytosol (GO:0005829);; Cellular Component: cytoskeleton (GO:0005856);; Biological Process: cytoskeleton organization (GO:0007010);; Cellular Component: membrane (GO:0016020);; Biological Process: cell migration (GO:0016477);;	K20124|5.93849e-38|ssc:100519694|K20124 proline-serine-threonine phosphatase interacting protein 2 | (RefSeq) PSTPIP2; proline-serine-threonine phosphatase interacting protein 2	--	[D]	Cell cycle control, cell division, chromosome partitioning	--	--	proline-serine-threonine phosphatase-interacting protein 2 [Sus scrofa]
ONT.397.1	[C]	Energy production and conversion	Molecular Function: nucleotide binding (GO:0000166);; Cellular Component: mitochondrial inner membrane (GO:0005743);; Biological Process: ATP biosynthetic process (GO:0006754);; Molecular Function: hydrogen ion transmembrane transporter activity (GO:0015078);; Molecular Function: cation-transporting ATPase activity (GO:0019829);; Cellular Component: proton-transporting two-sector ATPase complex, …	K02132|0|bacu:102999628|K02132 F-type H+-transporting ATPase subunit alpha | (RefSeq) ATP5A1; ATP synthase, H+ transporting, mitochondrial F1 complex, alpha subunit 1, cardiac muscle	Oxidative phosphorylation (ko00190);; Alzheimer's disease (ko05010);; Parkinson's disease (ko05012);; Huntington's disease (ko05016)	[C]	Energy production and conversion	ATP synthase alpha/beta family, beta-barrel domain;; ATP synthase alpha/beta chain, C terminal domain;; ATP synthase alpha/beta family, nucleotide-binding domain;; ATP synthase alpha/beta family, nucleotide-binding domain;; ATP synthase alpha/beta family, nucleotide-binding domain	ATP synthase subunit alpha, mitochondrial OS=Sus scrofa OX=9823 GN=ATP5F1A PE=1 SV=2	PREDICTED: ATP synthase subunit alpha, mitochondrial [Balaenoptera acutorostrata scammoni]
ONT.397.9	[C]	Energy production and conversion	Molecular Function: protein binding (GO:0005515);; Molecular Function: ATP binding (GO:0005524);; Cellular Component: mitochondrial proton-transporting ATP synthase complex (GO:0005753);; Cellular Component: plasma membrane (GO:0005886);; Biological Process: ATP synthesis coupled proton transport (GO:0015986);; Biological Process: ATP hydrolysis coupled proton transport (GO:0015991);; Cellular Co…	K02132|7.08505e-167|ssc:100157880|K02132 F-type H+-transporting ATPase subunit alpha | (RefSeq) ATP5A1, ATP5A2; ATP synthase, H+ transporting, mitochondrial F1 complex, alpha subunit 1, cardiac muscle	Oxidative phosphorylation (ko00190);; Alzheimer's disease (ko05010);; Parkinson's disease (ko05012);; Huntington's disease (ko05016)	[C]	Energy production and conversion	ATP synthase alpha/beta chain, C terminal domain;; ATP synthase alpha/beta family, nucleotide-binding domain;; ATP synthase alpha/beta family, nucleotide-binding domain	ATP synthase subunit alpha, mitochondrial OS=Sus scrofa OX=9823 GN=ATP5F1A PE=1 SV=2	ATP synthase subunit alpha, mitochondrial [Sus scrofa]
ONT.397.12	[C]	Energy production and conversion	Biological Process: proton transport (GO:0015992);; Cellular Component: proton-transporting two-sector ATPase complex (GO:0016469);; Molecular Function: hydrolase activity, acting on acid anhydrides, catalyzing transmembrane movement of substances (GO:0016820);; Molecular Function: ATPase activity (GO:0016887);; Cellular Component: intracellular membrane-bounded organelle (GO:0043231);; Biologica…	K02132|1.27521e-112|crg:105332067|K02132 F-type H+-transporting ATPase subunit alpha | (RefSeq) ATP synthase subunit alpha, mitochondrial-like	Oxidative phosphorylation (ko00190)	[C]	Energy production and conversion	ATP synthase alpha/beta family, nucleotide-binding domain	ATP synthase subunit alpha, mitochondrial OS=Bos taurus OX=9913 GN=ATP5F1A PE=1 SV=1	hypothetical protein M91_17169 [Bos mutus]
ONT.397.13	[C]	Energy production and conversion	Molecular Function: protein binding (GO:0005515);; Cellular Component: mitochondrial proton-transporting ATP synthase complex (GO:0005753);; Biological Process: proton transport (GO:0015992);; Molecular Function: hydrolase activity, acting on acid anhydrides, catalyzing transmembrane movement of substances (GO:0016820);; Molecular Function: ATPase activity (GO:0016887);; Biological Process: ATP m…	K02132|1.01874e-82|ssc:100157880|K02132 F-type H+-transporting ATPase subunit alpha | (RefSeq) ATP5A1, ATP5A2; ATP synthase, H+ transporting, mitochondrial F1 complex, alpha subunit 1, cardiac muscle	Oxidative phosphorylation (ko00190);; Alzheimer's disease (ko05010);; Parkinson's disease (ko05012);; Huntington's disease (ko05016)	[C]	Energy production and conversion	ATP synthase alpha/beta family, beta-barrel domain	ATP synthase subunit alpha, mitochondrial OS=Sus scrofa OX=9823 GN=ATP5F1A PE=1 SV=2	ATP synthase subunit alpha, mitochondrial [Sus scrofa]
ONT.397.14	[C]	Energy production and conversion	Biological Process: negative regulation of endothelial cell proliferation (GO:0001937);; Molecular Function: ATP binding (GO:0005524);; Cellular Component: mitochondrial proton-transporting ATP synthase complex (GO:0005753);; Cellular Component: plasma membrane (GO:0005886);; Biological Process: lipid metabolic process (GO:0006629);; Cellular Component: COP9 signalosome (GO:0008180);; Biological …	K02132|2.89181e-152|ssc:100157880|K02132 F-type H+-transporting ATPase subunit alpha | (RefSeq) ATP5A1, ATP5A2; ATP synthase, H+ transporting, mitochondrial F1 complex, alpha subunit 1, cardiac muscle	Oxidative phosphorylation (ko00190);; Alzheimer's disease (ko05010);; Parkinson's disease (ko05012);; Huntington's disease (ko05016)	[C]	Energy production and conversion	ATP synthase alpha/beta family, beta-barrel domain;; ATP synthase alpha/beta family, nucleotide-binding domain	ATP synthase subunit alpha, mitochondrial OS=Sus scrofa OX=9823 GN=ATP5F1A PE=1 SV=2	ATP synthase subunit alpha, mitochondrial [Sus scrofa]
ONT.397.17	[C]	Energy production and conversion	Molecular Function: nucleotide binding (GO:0000166);; Cellular Component: mitochondrial inner membrane (GO:0005743);; Biological Process: ATP biosynthetic process (GO:0006754);; Molecular Function: hydrogen ion transmembrane transporter activity (GO:0015078);; Molecular Function: cation-transporting ATPase activity (GO:0019829);; Cellular Component: proton-transporting two-sector ATPase complex, …	K02132|1.17919e-31|gja:107111448|K02132 F-type H+-transporting ATPase subunit alpha | (RefSeq) ATP5A1; ATP synthase, H+ transporting, mitochondrial F1 complex, alpha subunit 1, cardiac muscle	Oxidative phosphorylation (ko00190)	[C]	Energy production and conversion	--	ATP synthase subunit alpha, mitochondrial OS=Sus scrofa OX=9823 GN=ATP5F1A PE=1 SV=2	PREDICTED: ATP synthase subunit alpha, mitochondrial-like isoform X2 [Ovis aries musimon]
ONT.397.18	--	--	Biological Process: negative regulation of endothelial cell proliferation (GO:0001937);; Molecular Function: ATP binding (GO:0005524);; Cellular Component: mitochondrial proton-transporting ATP synthase complex (GO:0005753);; Cellular Component: plasma membrane (GO:0005886);; Biological Process: lipid metabolic process (GO:0006629);; Cellular Component: COP9 signalosome (GO:0008180);; Biological …	K02132|2.147e-28|ssc:100157880|K02132 F-type H+-transporting ATPase subunit alpha | (RefSeq) ATP5A1, ATP5A2; ATP synthase, H+ transporting, mitochondrial F1 complex, alpha subunit 1, cardiac muscle	Oxidative phosphorylation (ko00190);; Alzheimer's disease (ko05010);; Parkinson's disease (ko05012);; Huntington's disease (ko05016)	[C]	Energy production and conversion	--	ATP synthase subunit alpha, mitochondrial OS=Sus scrofa OX=9823 GN=ATP5F1A PE=1 SV=2	ATP synthase subunit alpha, mitochondrial [Sus scrofa]
ONT.398.1	--	--	--	K16584|3.10137e-72|ssc:100152640|K16584 HAUS augmin-like complex subunit 1 | (RefSeq) HAUS1; HAUS augmin like complex subunit 1	--	--	--	--	HAUS augmin-like complex subunit 1 OS=Bos taurus OX=9913 GN=HAUS1 PE=2 SV=1	HAUS augmin-like complex subunit 1 [Sus scrofa]
ONT.398.3	--	--	Cellular Component: cytoplasm (GO:0005737);; Cellular Component: centrosome (GO:0005813);; Biological Process: spindle assembly (GO:0051225);; Biological Process: centrosome cycle (GO:0051297);; Cellular Component: HAUS complex (GO:0070652);;	K16584|1.39379e-74|ssc:100152640|K16584 HAUS augmin-like complex subunit 1 | (RefSeq) HAUS1; HAUS augmin like complex subunit 1	--	--	--	--	HAUS augmin-like complex subunit 1 OS=Bos taurus OX=9913 GN=HAUS1 PE=2 SV=1	HAUS augmin-like complex subunit 1 [Sus scrofa]
ONT.398.6	--	--	Biological Process: microtubule cytoskeleton organization (GO:0000226);; Cellular Component: microtubule cytoskeleton (GO:0015630);; Cellular Component: cytoskeletal part (GO:0044430);;	K16584|6.93132e-70|ssc:100152640|K16584 HAUS augmin-like complex subunit 1 | (RefSeq) HAUS1; HAUS augmin like complex subunit 1	--	--	--	--	HAUS augmin-like complex subunit 1 OS=Bos taurus OX=9913 GN=HAUS1 PE=2 SV=1	HAUS augmin-like complex subunit 1 [Sus scrofa]
ONT.398.7	--	--	Cellular Component: cytoplasm (GO:0005737);; Cellular Component: centrosome (GO:0005813);; Biological Process: spindle assembly (GO:0051225);; Biological Process: centrosome cycle (GO:0051297);; Cellular Component: HAUS complex (GO:0070652);;	K16584|9.19091e-100|ssc:100152640|K16584 HAUS augmin-like complex subunit 1 | (RefSeq) HAUS1; HAUS augmin like complex subunit 1	--	--	--	--	HAUS augmin-like complex subunit 1 OS=Bos taurus OX=9913 GN=HAUS1 PE=2 SV=1	HAUS augmin-like complex subunit 1 [Sus scrofa]
ONT.398.10	--	--	--	K16584|3.55566e-80|ssc:100152640|K16584 HAUS augmin-like complex subunit 1 | (RefSeq) HAUS1; HAUS augmin like complex subunit 1	--	--	--	--	HAUS augmin-like complex subunit 1 OS=Bos taurus OX=9913 GN=HAUS1 PE=2 SV=1	HAUS augmin-like complex subunit 1 [Sus scrofa]
ONT.398.13	--	--	Cellular Component: cytoplasm (GO:0005737);; Cellular Component: centrosome (GO:0005813);; Biological Process: spindle assembly (GO:0051225);; Biological Process: centrosome cycle (GO:0051297);; Cellular Component: HAUS complex (GO:0070652);;	K16584|5.4705e-62|ssc:100152640|K16584 HAUS augmin-like complex subunit 1 | (RefSeq) HAUS1; HAUS augmin like complex subunit 1	--	--	--	--	HAUS augmin-like complex subunit 1 OS=Bos taurus OX=9913 GN=HAUS1 PE=2 SV=1	PREDICTED: HAUS augmin-like complex subunit 1 isoform X1 [Ochotona princeps]
ONT.399.1	--	--	--	--	--	--	--	--	--	PREDICTED: LOW QUALITY PROTEIN: uncharacterized protein C18orf25 homolog [Tursiops truncatus]
ONT.401.1	--	--	--	--	--	--	--	--	--	--
ONT.402.1	--	--	Molecular Function: alpha-N-acetylneuraminate alpha-2,8-sialyltransferase activity (GO:0003828);; Biological Process: protein glycosylation (GO:0006486);; Cellular Component: integral component of Golgi membrane (GO:0030173);; Biological Process: sialylation (GO:0097503);;	K03369|6.64573e-42|pon:100454394|K03369 alpha-N-acetyl-neuraminate alpha-2,8-sialyltransferase (sialyltransferase 8E) [EC:2.4.99.-] | (RefSeq) ST8SIA5; ST8 alpha-N-acetyl-neuraminide alpha-2,8-sialyltransferase 5	Glycosphingolipid biosynthesis - ganglio series (ko00604)	[G]	Carbohydrate transport and metabolism	Glycosyltransferase family 29 (sialyltransferase)	Alpha-2,8-sialyltransferase 8E OS=Pan troglodytes OX=9598 GN=ST8SIA5 PE=2 SV=1	ST8SIA5, partial [Cervus elaphus hippelaphus]
ONT.404.1	--	--	Molecular Function: DNA binding (GO:0003677);; Molecular Function: transcription factor binding (GO:0008134);; Molecular Function: zinc ion binding (GO:0008270);; Cellular Component: PML body (GO:0016605);; Biological Process: protein sumoylation (GO:0016925);; Molecular Function: ubiquitin protein ligase binding (GO:0031625);; Biological Process: negative regulation of sequence-specific DNA bind…	K16063|2.44729e-17|bacu:103003200|K16063 E3 SUMO-protein ligase PIAS2 | (RefSeq) PIAS2; protein inhibitor of activated STAT 2	Ubiquitin mediated proteolysis (ko04120);; Jak-STAT signaling pathway (ko04630);; Pathways in cancer (ko05200);; Small cell lung cancer (ko05222)	[K]	Transcription	--	--	PREDICTED: E3 SUMO-protein ligase PIAS2 isoform X1 [Ovis aries musimon]
ONT.405.1	[F]	Nucleotide transport and metabolism	--	--	--	[R]	General function prediction only	--	Haloacid dehalogenase-like hydrolase domain-containing protein 2 OS=Bos taurus OX=9913 GN=HDHD2 PE=2 SV=1	PREDICTED: haloacid dehalogenase-like hydrolase domain-containing protein 2 isoform X2 [Pteropus alecto]
ONT.405.2	[F]	Nucleotide transport and metabolism	Biological Process: dephosphorylation (GO:0016311);; Molecular Function: phosphatase activity (GO:0016791);; Molecular Function: enzyme binding (GO:0019899);; Cellular Component: extracellular exosome (GO:0070062);;	--	--	[R]	General function prediction only	--	Haloacid dehalogenase-like hydrolase domain-containing protein 2 OS=Bos taurus OX=9913 GN=HDHD2 PE=2 SV=1	PREDICTED: haloacid dehalogenase-like hydrolase domain-containing protein 2 [Ornithorhynchus anatinus]
ONT.406.1	--	--	Cellular Component: integral component of membrane (GO:0016021);;	--	--	[S]	Function unknown	Yos1-like	Immediate early response 3-interacting protein 1 OS=Bos taurus OX=9913 GN=IER3IP1 PE=3 SV=1	PREDICTED: immediate early response 3-interacting protein 1 [Condylura cristata]
ONT.406.2	--	--	--	--	--	[S]	Function unknown	--	Immediate early response 3-interacting protein 1 OS=Bos taurus OX=9913 GN=IER3IP1 PE=3 SV=1	PREDICTED: immediate early response 3-interacting protein 1 [Condylura cristata]
ONT.406.3	--	--	Cellular Component: integral component of membrane (GO:0016021);;	--	--	[S]	Function unknown	Yos1-like	Immediate early response 3-interacting protein 1 OS=Bos taurus OX=9913 GN=IER3IP1 PE=3 SV=1	immediate early response 3-interacting protein 1 [Sarcophilus harrisii]
ONT.406.4	--	--	Cellular Component: integral component of membrane (GO:0016021);;	--	--	[S]	Function unknown	Yos1-like	Immediate early response 3-interacting protein 1 OS=Bos taurus OX=9913 GN=IER3IP1 PE=3 SV=1	PREDICTED: immediate early response 3-interacting protein 1 [Condylura cristata]
ONT.406.5	--	--	Cellular Component: integral component of membrane (GO:0016021);;	--	--	[S]	Function unknown	Yos1-like	Immediate early response 3-interacting protein 1 OS=Bos taurus OX=9913 GN=IER3IP1 PE=3 SV=1	PREDICTED: immediate early response 3-interacting protein 1 [Oryctolagus cuniculus]
ONT.407.1	--	--	--	--	--	--	--	--	--	--
ONT.408.1	--	--	Biological Process: negative regulation of transcription from RNA polymerase II promoter (GO:0000122);; Cellular Component: nuclear chromatin (GO:0000790);; Molecular Function: RNA polymerase II core promoter proximal region sequence-specific DNA binding (GO:0000978);; Molecular Function: transcriptional activator activity, RNA polymerase II core promoter proximal region sequence-specific binding…	--	--	[TK]	Signal transduction mechanisms;; Transcription	--	Mothers against decapentaplegic homolog 2 OS=Pongo abelii OX=9601 GN=SMAD2 PE=2 SV=1	PREDICTED: mothers against decapentaplegic homolog 2 isoform X3 [Myotis davidii]
ONT.409.1	--	--	--	--	--	--	--	--	--	--
ONT.410.1	--	--	--	--	--	--	--	--	--	--
ONT.411.1	--	--	--	--	--	--	--	--	--	--
ONT.412.2	--	--	--	--	--	[R]	General function prediction only	Dyggve-Melchior-Clausen syndrome protein;; Dyggve-Melchior-Clausen syndrome protein;; Dyggve-Melchior-Clausen syndrome protein	Dymeclin OS=Pongo abelii OX=9601 GN=DYM PE=2 SV=1	PREDICTED: dymeclin isoform X2 [Rhinolophus sinicus]
ONT.412.3	--	--	--	--	--	--	--	--	Dymeclin OS=Pongo abelii OX=9601 GN=DYM PE=2 SV=1	dymeclin isoform X3 [Loxodonta africana]
ONT.412.7	--	--	Cellular Component: Golgi apparatus (GO:0005794);; Biological Process: Golgi organization (GO:0007030);; Molecular Function: enzyme binding (GO:0019899);; Biological Process: bone development (GO:0060348);;	--	--	--	--	--	Dymeclin OS=Pongo abelii OX=9601 GN=DYM PE=2 SV=1	PREDICTED: dymeclin-like [Bison bison bison]
ONT.413.1	--	--	Molecular Function: signal transducer activity (GO:0004871);; Biological Process: positive regulation of I-kappaB kinase/NF-kappaB signaling (GO:0043123);;	--	--	--	--	--	UPF0729 protein C18orf32 homolog OS=Bos taurus OX=9913 PE=3 SV=1	UPF0729 protein C18orf32 homolog [Odocoileus virginianus texanus]
ONT.413.2	--	--	--	--	--	--	--	--	UPF0729 protein C18orf32 homolog OS=Bos taurus OX=9913 PE=3 SV=1	UPF0729 protein C18orf32 homolog [Odocoileus virginianus texanus]
ONT.413.6	--	--	Molecular Function: signal transducer activity (GO:0004871);; Biological Process: positive regulation of I-kappaB kinase/NF-kappaB signaling (GO:0043123);;	--	--	--	--	--	UPF0729 protein C18orf32 homolog OS=Bos taurus OX=9913 PE=3 SV=1	PREDICTED: UPF0729 protein C18orf32 homolog [Bubalus bubalis]
ONT.413.7	--	--	Molecular Function: signal transducer activity (GO:0004871);; Biological Process: positive regulation of I-kappaB kinase/NF-kappaB signaling (GO:0043123);;	--	--	--	--	--	UPF0729 protein C18orf32 homolog OS=Bos taurus OX=9913 PE=3 SV=1	UPF0729 protein C18orf32 homolog [Odocoileus virginianus texanus]
ONT.413.10	--	--	Molecular Function: signal transducer activity (GO:0004871);; Biological Process: signal transduction (GO:0007165);;	--	--	--	--	Domain of unknown function (DUF4512)	UPF0729 protein C18orf32 homolog OS=Bos taurus OX=9913 PE=3 SV=1	PREDICTED: UPF0729 protein C18orf32 homolog isoform X1 [Hipposideros armiger]
ONT.414.1	--	--	Cellular Component: ribosome (GO:0005840);;	K02880|1.33081e-53|oas:101115109|K02880 large subunit ribosomal protein L17e | (RefSeq) 60S ribosomal protein L17-like	Ribosome (ko03010)	[J]	Translation, ribosomal structure and biogenesis	--	60S ribosomal protein L17 OS=Felis catus OX=9685 GN=RPL17 PE=2 SV=3	PREDICTED: 60S ribosomal protein L17-like [Ovis aries musimon]
ONT.414.2	[J]	Translation, ribosomal structure and biogenesis	Molecular Function: structural constituent of ribosome (GO:0003735);; Biological Process: translation (GO:0006412);; Cellular Component: large ribosomal subunit (GO:0015934);;	K02880|1.17576e-73|cin:100184404|K02880 large subunit ribosomal protein L17e | (RefSeq) 60S ribosomal protein L17-like	Ribosome (ko03010)	[J]	Translation, ribosomal structure and biogenesis	Ribosomal protein L22p/L17e;; Ribosomal protein L22p/L17e	60S ribosomal protein L17 OS=Bos taurus OX=9913 GN=RPL17 PE=2 SV=3	60S ribosomal protein L17 isoform X3 [Delphinapterus leucas]
ONT.414.5	--	--	Cellular Component: ribosome (GO:0005840);;	K02880|1.10359e-26|oas:101115109|K02880 large subunit ribosomal protein L17e | (RefSeq) 60S ribosomal protein L17-like	Ribosome (ko03010)	[J]	Translation, ribosomal structure and biogenesis	Ribosomal protein L22p/L17e	60S ribosomal protein L17 OS=Felis catus OX=9685 GN=RPL17 PE=2 SV=3	hypothetical protein M91_04405, partial [Bos mutus]
ONT.414.9	[J]	Translation, ribosomal structure and biogenesis	Molecular Function: structural constituent of ribosome (GO:0003735);; Biological Process: translation (GO:0006412);; Cellular Component: large ribosomal subunit (GO:0015934);;	K02880|2.14415e-117|umr:103664084|K02880 large subunit ribosomal protein L17e | (RefSeq) RPL17; ribosomal protein L17	Ribosome (ko03010)	[J]	Translation, ribosomal structure and biogenesis	Ribosomal protein L22p/L17e	60S ribosomal protein L17 OS=Felis catus OX=9685 GN=RPL17 PE=2 SV=3	60S ribosomal protein L17, partial [Bos mutus]
ONT.414.11	[J]	Translation, ribosomal structure and biogenesis	Molecular Function: structural constituent of ribosome (GO:0003735);; Biological Process: translation (GO:0006412);; Cellular Component: large ribosomal subunit (GO:0015934);;	K02880|4.58284e-84|phd:102344273|K02880 large subunit ribosomal protein L17e | (RefSeq) 60S ribosomal protein L17-like	Ribosome (ko03010)	[J]	Translation, ribosomal structure and biogenesis	Ribosomal protein L22p/L17e;; Ribosomal protein L22p/L17e	60S ribosomal protein L17 OS=Felis catus OX=9685 GN=RPL17 PE=2 SV=3	PREDICTED: 60S ribosomal protein L17 isoform X2 [Ochotona princeps]
ONT.414.12	[J]	Translation, ribosomal structure and biogenesis	Molecular Function: structural constituent of ribosome (GO:0003735);; Biological Process: translation (GO:0006412);; Cellular Component: large ribosomal subunit (GO:0015934);;	K02880|5.51593e-78|tup:106735130|K02880 large subunit ribosomal protein L17e | (RefSeq) 60S ribosomal protein L17	Ribosome (ko03010)	[J]	Translation, ribosomal structure and biogenesis	Ribosomal protein L22p/L17e	60S ribosomal protein L17 OS=Felis catus OX=9685 GN=RPL17 PE=2 SV=3	PREDICTED: 60S ribosomal protein L17 isoform X2 [Ochotona princeps]
ONT.414.15	[J]	Translation, ribosomal structure and biogenesis	Molecular Function: structural constituent of ribosome (GO:0003735);; Cellular Component: nucleus (GO:0005634);; Biological Process: translation (GO:0006412);; Cellular Component: cytosolic large ribosomal subunit (GO:0022625);; Molecular Function: RNA binding (GO:0044822);;	K02880|2.84901e-54|bacu:103008353|K02880 large subunit ribosomal protein L17e | (RefSeq) 60S ribosomal protein L17-like	Ribosome (ko03010)	[J]	Translation, ribosomal structure and biogenesis	--	60S ribosomal protein L17 OS=Felis catus OX=9685 GN=RPL17 PE=2 SV=3	60S ribosomal protein L17 [Tupaia chinensis]
ONT.414.19	[J]	Translation, ribosomal structure and biogenesis	--	--	--	[J]	Translation, ribosomal structure and biogenesis	--	60S ribosomal protein L17 OS=Felis catus OX=9685 GN=RPL17 PE=2 SV=3	PREDICTED: 60S ribosomal protein L17-like isoform X2 [Mustela putorius furo]
ONT.414.22	[J]	Translation, ribosomal structure and biogenesis	Molecular Function: structural constituent of ribosome (GO:0003735);; Biological Process: translation (GO:0006412);; Cellular Component: large ribosomal subunit (GO:0015934);;	K02880|1.33094e-30|hsa:100526842|K02880 large subunit ribosomal protein L17e | (RefSeq) RPL17-C18orf32; RPL17-C18orf32 readthrough	Ribosome (ko03010)	[J]	Translation, ribosomal structure and biogenesis	--	60S ribosomal protein L17 OS=Bos taurus OX=9913 GN=RPL17 PE=2 SV=3	similar to ribosomal protein L17, partial [Bos taurus]
ONT.414.21	--	--	--	K02880|1.38341e-29|ggo:101136694|K02880 large subunit ribosomal protein L17e | (RefSeq) 60S ribosomal protein L17 pseudogene	Ribosome (ko03010)	[J]	Translation, ribosomal structure and biogenesis	--	60S ribosomal protein L17 OS=Felis catus OX=9685 GN=RPL17 PE=2 SV=3	60S ribosomal protein L17, partial [Bos mutus]
ONT.414.24	[J]	Translation, ribosomal structure and biogenesis	Cellular Component: intracellular (GO:0005622);;	K02880|2.51735e-33|phd:102344273|K02880 large subunit ribosomal protein L17e | (RefSeq) 60S ribosomal protein L17-like	Ribosome (ko03010)	[J]	Translation, ribosomal structure and biogenesis	--	60S ribosomal protein L17 OS=Felis catus OX=9685 GN=RPL17 PE=2 SV=3	60S ribosomal protein L17 isoform X1 [Enhydra lutris kenyoni]
ONT.415.1	[I]	Lipid transport and metabolism	Molecular Function: acetyl-CoA C-acyltransferase activity (GO:0003988);; Cellular Component: mitochondrial inner membrane (GO:0005743);; Biological Process: fatty acid metabolic process (GO:0006631);; Molecular Function: RNA binding (GO:0044822);; Cellular Component: extracellular exosome (GO:0070062);; Biological Process: cellular response to hypoxia (GO:0071456);; Biological Process: negative r…	K07508|3.19761e-93|asn:102376718|K07508 acetyl-CoA acyltransferase 2 [EC:2.3.1.16] | (RefSeq) ACAA2; acetyl-CoA acyltransferase 2	Fatty acid elongation (ko00062);; Fatty acid degradation (ko00071);; Valine, leucine and isoleucine degradation (ko00280);; Fatty acid metabolism (ko01212)	[I]	Lipid transport and metabolism	Thiolase, N-terminal domain	3-ketoacyl-CoA thiolase, mitochondrial OS=Bos taurus OX=9913 GN=ACAA2 PE=2 SV=1	ACAA2 [Cervus elaphus hippelaphus]
ONT.415.4	[I]	Lipid transport and metabolism	Biological Process: cellular process (GO:0009987);; Molecular Function: transferase activity (GO:0016740);; Cellular Component: membrane-bounded organelle (GO:0043227);;	K07508|3.78817e-130|ssc:100312959|K07508 acetyl-CoA acyltransferase 2 [EC:2.3.1.16] | (RefSeq) ACAA2; acetyl-CoA acyltransferase 2	Fatty acid elongation (ko00062);; Fatty acid degradation (ko00071);; Valine, leucine and isoleucine degradation (ko00280);; Fatty acid metabolism (ko01212)	[I]	Lipid transport and metabolism	Thiolase, C-terminal domain;; Thiolase, N-terminal domain	3-ketoacyl-CoA thiolase, mitochondrial OS=Bos taurus OX=9913 GN=ACAA2 PE=2 SV=1	3-ketoacyl-CoA thiolase, mitochondrial [Sus scrofa]
ONT.416.1	--	--	Biological Process: negative regulation of transcription from RNA polymerase II promoter (GO:0000122);; Cellular Component: nucleus (GO:0005634);; Biological Process: methylation-dependent chromatin silencing (GO:0006346);; Molecular Function: zinc ion binding (GO:0008270);; Molecular Function: methyl-CpG binding (GO:0008327);; Molecular Function: double-stranded methylated DNA binding (GO:001038…	K11589|2.77898e-19|cfr:102511685|K11589 methyl-CpG-binding domain protein 1 | (RefSeq) MBD1; methyl-CpG binding domain protein 1	--	--	--	--	Apolipoprotein A-IV OS=Felis catus OX=9685 GN=APOA4 PE=3 SV=2	methyl-CpG-binding domain protein 1 isoform X26 [Sus scrofa]
ONT.417.1	--	--	--	K14960|3.76293e-25|tup:102484410|K14960 COMPASS component SPP1 | (RefSeq) CXXC-type zinc finger protein 1	--	[R]	General function prediction only	--	CXXC-type zinc finger protein 1 OS=Bos taurus OX=9913 GN=CXXC1 PE=2 SV=1	CpG-binding protein [Tupaia chinensis]
ONT.417.2	--	--	Cellular Component: nucleus (GO:0005634);;	K14960|4.37825e-67|bom:102280350|K14960 COMPASS component SPP1 | (RefSeq) CXXC1; CXXC finger protein 1	--	[R]	General function prediction only	CpG binding protein zinc finger C terminal domain;; CXXC zinc finger domain	CXXC-type zinc finger protein 1 OS=Bos taurus OX=9913 GN=CXXC1 PE=2 SV=1	LOW QUALITY PROTEIN: CXXC-type zinc finger protein 1 [Loxodonta africana]
ONT.417.3	--	--	Cellular Component: cytoplasm (GO:0005737);; Molecular Function: zinc ion binding (GO:0008270);; Cellular Component: nuclear matrix (GO:0016363);; Cellular Component: nuclear speck (GO:0016607);; Molecular Function: histone methyltransferase activity (H3-K4 specific) (GO:0042800);; Molecular Function: unmethylated CpG binding (GO:0045322);; Biological Process: positive regulation of transcription…	K14960|7.21266e-97|ssc:100522911|K14960 COMPASS component SPP1 | (RefSeq) CXXC1; CXXC finger protein 1	--	[R]	General function prediction only	CXXC zinc finger domain;; CpG binding protein zinc finger C terminal domain	CXXC-type zinc finger protein 1 OS=Bos taurus OX=9913 GN=CXXC1 PE=2 SV=1	CXXC-type zinc finger protein 1 isoform X2 [Odocoileus virginianus texanus]
ONT.417.6	--	--	Molecular Function: binding (GO:0005488);; Cellular Component: nuclear lumen (GO:0031981);;	K14960|1.86999e-107|ssc:100522911|K14960 COMPASS component SPP1 | (RefSeq) CXXC1; CXXC finger protein 1	--	[R]	General function prediction only	CpG binding protein zinc finger C terminal domain	CXXC-type zinc finger protein 1 OS=Bos taurus OX=9913 GN=CXXC1 PE=2 SV=1	CXXC-type zinc finger protein 1 isoform X1 [Sus scrofa]
ONT.417.7	--	--	Molecular Function: DNA binding (GO:0003677);; Biological Process: regulation of transcription, DNA-templated (GO:0006355);; Molecular Function: metal ion binding (GO:0046872);; Cellular Component: Set1C/COMPASS complex (GO:0048188);;	K14960|1.29415e-95|ssc:100522911|K14960 COMPASS component SPP1 | (RefSeq) CXXC1; CXXC finger protein 1	--	[R]	General function prediction only	PHD-finger	CXXC-type zinc finger protein 1 OS=Bos taurus OX=9913 GN=CXXC1 PE=2 SV=1	PREDICTED: CXXC-type zinc finger protein 1 [Rhinolophus sinicus]
ONT.417.8	--	--	Molecular Function: DNA binding (GO:0003677);; Biological Process: regulation of transcription, DNA-templated (GO:0006355);; Cellular Component: histone methyltransferase complex (GO:0035097);; Molecular Function: metal ion binding (GO:0046872);;	K14960|2.31979e-84|ssc:100522911|K14960 COMPASS component SPP1 | (RefSeq) CXXC1; CXXC finger protein 1	--	[R]	General function prediction only	CXXC zinc finger domain	CXXC-type zinc finger protein 1 OS=Bos taurus OX=9913 GN=CXXC1 PE=2 SV=1	CXXC-type zinc finger protein 1 isoform X1 [Sus scrofa]
ONT.418.1	[C]	Energy production and conversion	--	K00027|5.31704e-137|pon:100440529|K00027 malate dehydrogenase (oxaloacetate-decarboxylating) [EC:1.1.1.38] | (RefSeq) ME2; malic enzyme 2	Pyruvate metabolism (ko00620);; Carbon metabolism (ko01200)	[C]	Energy production and conversion	Malic enzyme, N-terminal domain;; Malic enzyme, N-terminal domain	NADP-dependent malic enzyme (Fragment) OS=Sus scrofa OX=9823 GN=ME1 PE=2 SV=1	NAD-dependent malic enzyme, mitochondrial [Sus scrofa]
ONT.421.1	--	--	--	--	--	--	--	--	--	--
ONT.422.1	--	--	--	--	--	--	--	--	--	--
ONT.423.1	--	--	--	--	--	--	--	--	--	--
ONT.425.1	--	--	Biological Process: negative regulation of transcription from RNA polymerase II promoter (GO:0000122);; Cellular Component: chromatin (GO:0000785);; Molecular Function: RNA polymerase II regulatory region sequence-specific DNA binding (GO:0000977);; Molecular Function: chromatin binding (GO:0003682);; Molecular Function: RNA binding (GO:0003723);; Biological Process: methylation-dependent chromat…	--	--	[KB]	Transcription;; Chromatin structure and dynamics	--	--	methyl-CpG-binding domain protein 2 [Camelus ferus]
ONT.426.1	[L]	Replication, recombination and repair	--	K03510|5.22592e-176|pps:100993880|K03510 DNA polymerase iota [EC:2.7.7.7] | (RefSeq) POLI; DNA polymerase iota	Fanconi anemia pathway (ko03460)	[L]	Replication, recombination and repair	impB/mucB/samB family;; impB/mucB/samB family	--	PREDICTED: DNA polymerase iota isoform X3 [Orcinus orca]
ONT.427.1	--	--	Cellular Component: intracellular (GO:0005622);; Biological Process: intracellular signal transduction (GO:0035556);;	--	--	--	--	--	--	coiled-coil domain-containing protein 68 [Sus scrofa]
ONT.428.1	--	--	--	--	--	--	--	--	--	--
ONT.428.2	--	--	--	--	--	--	--	--	--	--
ONT.429.1	--	--	Biological Process: negative regulation of transcription from RNA polymerase II promoter (GO:0000122);; Molecular Function: RNA polymerase II core promoter proximal region sequence-specific DNA binding (GO:0000978);; Molecular Function: transcription factor activity, sequence-specific DNA binding, RNA polymerase recruiting (GO:0001011);; Molecular Function: transcriptional activator activity, RNA…	K15603|7.82597e-154|amj:102567660|K15603 transcription factor 4/12 | (RefSeq) TCF4; transcription factor 4	--	[K]	Transcription	--	Transcription factor 4 OS=Canis lupus familiaris OX=9615 GN=TCF4 PE=2 SV=2	PREDICTED: transcription factor 4 isoform X12 [Balaenoptera acutorostrata scammoni]
ONT.430.1	--	--	Biological Process: sulfate assimilation (GO:0000103);; Cellular Component: mitochondrion (GO:0005739);; Biological Process: protein folding (GO:0006457);; Biological Process: glycerol ether metabolic process (GO:0006662);; Molecular Function: protein disulfide oxidoreductase activity (GO:0015035);; Molecular Function: oxidoreductase activity, acting on a sulfur group of donors, disulfide as acce…	--	--	[O]	Posttranslational modification, protein turnover, chaperones	PITH domain;; PITH domain	Thioredoxin OS=Equus caballus OX=9796 GN=TXN PE=3 SV=3	thioredoxin-like protein 1 isoform X1 [Physeter catodon]
ONT.430.2	--	--	Biological Process: sulfate assimilation (GO:0000103);; Cellular Component: mitochondrion (GO:0005739);; Biological Process: protein folding (GO:0006457);; Biological Process: glycerol ether metabolic process (GO:0006662);; Molecular Function: protein disulfide oxidoreductase activity (GO:0015035);; Molecular Function: oxidoreductase activity, acting on a sulfur group of donors, disulfide as acce…	--	--	[O]	Posttranslational modification, protein turnover, chaperones	Thioredoxin;; PITH domain	--	thioredoxin-like protein 1 isoform X1 [Physeter catodon]
ONT.430.4	[O]	Posttranslational modification, protein turnover, chaperones	Biological Process: sulfate assimilation (GO:0000103);; Cellular Component: mitochondrion (GO:0005739);; Biological Process: protein folding (GO:0006457);; Biological Process: glycerol ether metabolic process (GO:0006662);; Molecular Function: protein disulfide oxidoreductase activity (GO:0015035);; Molecular Function: oxidoreductase activity, acting on a sulfur group of donors, disulfide as acce…	--	--	[O]	Posttranslational modification, protein turnover, chaperones	PITH domain;; Thioredoxin	Thioredoxin OS=Equus caballus OX=9796 GN=TXN PE=3 SV=3	thioredoxin-like protein 1 [Bos taurus]
ONT.430.5	--	--	Cellular Component: cell (GO:0005623);; Biological Process: metabolic process (GO:0008152);; Biological Process: cellular process (GO:0009987);; Molecular Function: oxidoreductase activity, acting on a sulfur group of donors (GO:0016667);; Biological Process: single-organism process (GO:0044699);;	--	--	[O]	Posttranslational modification, protein turnover, chaperones	--	--	thioredoxin-like protein 1 isoform X1 [Pteropus vampyrus]
ONT.430.6	--	--	--	--	--	--	--	--	--	--
ONT.430.12	[O]	Posttranslational modification, protein turnover, chaperones	Biological Process: sulfate assimilation (GO:0000103);; Cellular Component: mitochondrion (GO:0005739);; Biological Process: protein folding (GO:0006457);; Molecular Function: protein disulfide oxidoreductase activity (GO:0015035);; Molecular Function: oxidoreductase activity, acting on a sulfur group of donors, disulfide as acceptor (GO:0016671);; Biological Process: cellular response to oxidati…	--	--	[O]	Posttranslational modification, protein turnover, chaperones	Thioredoxin;; PITH domain;; PITH domain;; PITH domain	Thioredoxin OS=Callithrix jacchus OX=9483 GN=TXN PE=3 SV=3	thioredoxin-like protein 1 isoform X1 [Physeter catodon]
ONT.430.13	--	--	Cellular Component: cytoplasm (GO:0005737);; Biological Process: cellular process (GO:0009987);; Molecular Function: disulfide oxidoreductase activity (GO:0015036);; Cellular Component: membrane-bounded organelle (GO:0043227);; Biological Process: single-organism metabolic process (GO:0044710);;	--	--	[O]	Posttranslational modification, protein turnover, chaperones	PITH domain;; Thioredoxin	Thioredoxin OS=Equus caballus OX=9796 GN=TXN PE=3 SV=3	PREDICTED: thioredoxin-like protein 1 isoform X2 [Myotis brandtii]
ONT.430.14	--	--	Cellular Component: cell (GO:0005623);; Biological Process: metabolic process (GO:0008152);; Biological Process: cellular process (GO:0009987);; Molecular Function: oxidoreductase activity, acting on a sulfur group of donors (GO:0016667);; Biological Process: single-organism process (GO:0044699);;	--	--	[O]	Posttranslational modification, protein turnover, chaperones	PITH domain;; PITH domain	--	thioredoxin-like protein 1 isoform X3 [Pteropus vampyrus]
ONT.430.16	--	--	Cellular Component: cytoplasm (GO:0005737);; Biological Process: cellular process (GO:0009987);; Molecular Function: disulfide oxidoreductase activity (GO:0015036);; Cellular Component: membrane-bounded organelle (GO:0043227);; Biological Process: single-organism metabolic process (GO:0044710);;	--	--	[O]	Posttranslational modification, protein turnover, chaperones	--	Thioredoxin OS=Equus caballus OX=9796 GN=TXN PE=3 SV=3	thioredoxin-like protein 1 isoform X2 [Phascolarctos cinereus]
ONT.430.17	--	--	Biological Process: sulfate assimilation (GO:0000103);; Cellular Component: mitochondrion (GO:0005739);; Biological Process: protein folding (GO:0006457);; Biological Process: glycerol ether metabolic process (GO:0006662);; Molecular Function: protein disulfide oxidoreductase activity (GO:0015035);; Molecular Function: oxidoreductase activity, acting on a sulfur group of donors, disulfide as acce…	--	--	[O]	Posttranslational modification, protein turnover, chaperones	PITH domain;; Thioredoxin	Thioredoxin OS=Callithrix jacchus OX=9483 GN=TXN PE=3 SV=3	thioredoxin-like protein 1 isoform X1 [Pteropus vampyrus]
ONT.430.18	--	--	Cellular Component: cell (GO:0005623);; Biological Process: metabolic process (GO:0008152);; Biological Process: cellular process (GO:0009987);; Molecular Function: oxidoreductase activity, acting on a sulfur group of donors (GO:0016667);; Biological Process: single-organism process (GO:0044699);;	--	--	[O]	Posttranslational modification, protein turnover, chaperones	--	--	PREDICTED: thioredoxin-like protein 1 isoform X2 [Ochotona princeps]
ONT.430.19	--	--	Cellular Component: cell (GO:0005623);; Biological Process: metabolic process (GO:0008152);; Biological Process: cellular process (GO:0009987);; Molecular Function: oxidoreductase activity, acting on a sulfur group of donors (GO:0016667);; Biological Process: single-organism process (GO:0044699);;	--	--	[O]	Posttranslational modification, protein turnover, chaperones	Thioredoxin	Thioredoxin OS=Equus caballus OX=9796 GN=TXN PE=3 SV=3	thioredoxin-like protein 1 isoform X2 [Delphinapterus leucas]
ONT.430.20	--	--	Biological Process: sulfate assimilation (GO:0000103);; Cellular Component: mitochondrion (GO:0005739);; Biological Process: protein folding (GO:0006457);; Biological Process: glycerol ether metabolic process (GO:0006662);; Molecular Function: protein disulfide oxidoreductase activity (GO:0015035);; Molecular Function: oxidoreductase activity, acting on a sulfur group of donors, disulfide as acce…	--	--	[O]	Posttranslational modification, protein turnover, chaperones	Thioredoxin	Thioredoxin OS=Equus caballus OX=9796 GN=TXN PE=3 SV=3	thioredoxin-like protein [Camelus ferus]
ONT.432.1	--	--	Cellular Component: nucleus (GO:0005634);; Molecular Function: cAMP response element binding protein binding (GO:0008140);; Cellular Component: membrane (GO:0016020);; Biological Process: cellular component organization (GO:0016043);; Biological Process: cell differentiation (GO:0030154);; Biological Process: positive regulation of CREB transcription factor activity (GO:0032793);; Biological Proc…	--	--	--	--	--	--	cullin-7 isoform X1 [Sus scrofa]
ONT.433.1	[H]	Coenzyme transport and metabolism	--	K01772|2.42094e-90|ssc:100322873|K01772 protoporphyrin/coproporphyrin ferrochelatase [EC:4.99.1.1 4.99.1.9] | (RefSeq) FECH; ferrochelatase	Porphyrin and chlorophyll metabolism (ko00860)	[H]	Coenzyme transport and metabolism	Ferrochelatase	Ferrochelatase, mitochondrial OS=Bos taurus OX=9913 GN=FECH PE=1 SV=3	ferrochelatase, mitochondrial [Sus scrofa]
ONT.433.2	[H]	Coenzyme transport and metabolism	Molecular Function: ferrochelatase activity (GO:0004325);; Molecular Function: binding (GO:0005488);; Cellular Component: mitochondrion (GO:0005739);; Biological Process: heme biosynthetic process (GO:0006783);;	K01772|8.92015e-115|ssc:100322873|K01772 protoporphyrin/coproporphyrin ferrochelatase [EC:4.99.1.1 4.99.1.9] | (RefSeq) FECH; ferrochelatase	Porphyrin and chlorophyll metabolism (ko00860)	[H]	Coenzyme transport and metabolism	Ferrochelatase;; Ferrochelatase	Ferrochelatase, mitochondrial OS=Bos taurus OX=9913 GN=FECH PE=1 SV=3	ferrochelatase, mitochondrial [Sus scrofa]
ONT.433.4	[H]	Coenzyme transport and metabolism	Molecular Function: ferrochelatase activity (GO:0004325);; Cellular Component: mitochondrion (GO:0005739);; Biological Process: heme biosynthetic process (GO:0006783);; Cellular Component: membrane (GO:0016020);; Molecular Function: iron-sulfur cluster binding (GO:0051536);;	K01772|7.18841e-70|ssc:100322873|K01772 protoporphyrin/coproporphyrin ferrochelatase [EC:4.99.1.1 4.99.1.9] | (RefSeq) FECH; ferrochelatase	Porphyrin and chlorophyll metabolism (ko00860)	[H]	Coenzyme transport and metabolism	Ferrochelatase;; Ferrochelatase	Ferrochelatase, mitochondrial OS=Bos taurus OX=9913 GN=FECH PE=1 SV=3	ferrochelatase, mitochondrial isoform X1 [Sus scrofa]
ONT.433.6	[H]	Coenzyme transport and metabolism	--	K01772|3.03912e-80|ssc:100322873|K01772 protoporphyrin/coproporphyrin ferrochelatase [EC:4.99.1.1 4.99.1.9] | (RefSeq) FECH; ferrochelatase	Porphyrin and chlorophyll metabolism (ko00860)	[H]	Coenzyme transport and metabolism	Ferrochelatase	Ferrochelatase, mitochondrial OS=Bos taurus OX=9913 GN=FECH PE=1 SV=3	ferrochelatase, mitochondrial [Sus scrofa]
ONT.433.7	[H]	Coenzyme transport and metabolism	--	K01772|1.82875e-57|ssc:100322873|K01772 protoporphyrin/coproporphyrin ferrochelatase [EC:4.99.1.1 4.99.1.9] | (RefSeq) FECH; ferrochelatase	Porphyrin and chlorophyll metabolism (ko00860)	[H]	Coenzyme transport and metabolism	Ferrochelatase	Ferrochelatase, mitochondrial OS=Bos taurus OX=9913 GN=FECH PE=1 SV=3	ferrochelatase, mitochondrial [Sus scrofa]
ONT.433.10	[H]	Coenzyme transport and metabolism	--	K01772|6.27482e-53|ssc:100322873|K01772 protoporphyrin/coproporphyrin ferrochelatase [EC:4.99.1.1 4.99.1.9] | (RefSeq) FECH; ferrochelatase	Porphyrin and chlorophyll metabolism (ko00860)	[H]	Coenzyme transport and metabolism	Ferrochelatase;; Ferrochelatase;; Ferrochelatase;; Ferrochelatase	Ferrochelatase, mitochondrial OS=Bos taurus OX=9913 GN=FECH PE=1 SV=3	PREDICTED: ferrochelatase, mitochondrial isoform X3 [Ceratotherium simum simum]
ONT.434.1	[J]	Translation, ribosomal structure and biogenesis	--	K01893|6.33233e-135|ssc:100513328|K01893 asparaginyl-tRNA synthetase [EC:6.1.1.22] | (RefSeq) NARS; asparaginyl-tRNA synthetase	Aminoacyl-tRNA biosynthesis (ko00970)	[J]	Translation, ribosomal structure and biogenesis	tRNA synthetases class II (D, K and N);; tRNA synthetases class II (D, K and N)	Asparagine--tRNA ligase, cytoplasmic OS=Bos taurus OX=9913 GN=NARS PE=2 SV=3	asparagine--tRNA ligase, cytoplasmic isoform X2 [Sus scrofa]
ONT.434.9	[J]	Translation, ribosomal structure and biogenesis	Molecular Function: nucleic acid binding (GO:0003676);; Molecular Function: asparagine-tRNA ligase activity (GO:0004816);; Molecular Function: ATP binding (GO:0005524);; Cellular Component: cytoplasm (GO:0005737);; Biological Process: asparaginyl-tRNA aminoacylation (GO:0006421);;	K01893|5.16396e-105|umr:103676105|K01893 asparaginyl-tRNA synthetase [EC:6.1.1.22] | (RefSeq) NARS; asparaginyl-tRNA synthetase	Aminoacyl-tRNA biosynthesis (ko00970)	[J]	Translation, ribosomal structure and biogenesis	--	Asparagine--tRNA ligase, cytoplasmic OS=Macaca fascicularis OX=9541 GN=NARS PE=2 SV=1	Asparaginyl-tRNA synthetase, cytoplasmic [Pteropus alecto]
ONT.435.2	--	--	--	--	--	--	--	--	--	--
ONT.436.1	--	--	--	K03671|7.79333e-08|ptg:102969693|K03671 thioredoxin 1 | (RefSeq) thioredoxin	--	--	--	--	Thioredoxin OS=Ovis aries OX=9940 GN=TXN PE=3 SV=2	PREDICTED: thioredoxin [Panthera tigris altaica]
ONT.436.2	--	--	--	K03671|1.50842e-07|ptg:102969693|K03671 thioredoxin 1 | (RefSeq) thioredoxin	--	--	--	--	Thioredoxin OS=Ovis aries OX=9940 GN=TXN PE=3 SV=2	PREDICTED: thioredoxin [Panthera tigris altaica]
ONT.437.2	--	--	Molecular Function: catalytic activity (GO:0003824);;	K00604|3.0742e-16|bacu:103004621|K00604 methionyl-tRNA formyltransferase [EC:2.1.2.9] | (RefSeq) MTFMT; mitochondrial methionyl-tRNA formyltransferase	One carbon pool by folate (ko00670);; Aminoacyl-tRNA biosynthesis (ko00970)	[J]	Translation, ribosomal structure and biogenesis	--	Methionyl-tRNA formyltransferase, mitochondrial OS=Bos taurus OX=9913 GN=MTFMT PE=1 SV=2	PREDICTED: methionyl-tRNA formyltransferase, mitochondrial isoform X2 [Mustela putorius furo]
ONT.437.3	[J]	Translation, ribosomal structure and biogenesis	Molecular Function: methionyl-tRNA formyltransferase activity (GO:0004479);; Cellular Component: mitochondrion (GO:0005739);; Biological Process: translational initiation (GO:0006413);; Biological Process: conversion of methionyl-tRNA to N-formyl-methionyl-tRNA (GO:0071951);;	K00604|1.27684e-121|ssc:100513511|K00604 methionyl-tRNA formyltransferase [EC:2.1.2.9] | (RefSeq) MTFMT; mitochondrial methionyl-tRNA formyltransferase	One carbon pool by folate (ko00670);; Aminoacyl-tRNA biosynthesis (ko00970)	[J]	Translation, ribosomal structure and biogenesis	--	Methionyl-tRNA formyltransferase, mitochondrial OS=Bos taurus OX=9913 GN=MTFMT PE=1 SV=2	methionyl-tRNA formyltransferase, mitochondrial isoform X2 [Sus scrofa]
ONT.437.5	[J]	Translation, ribosomal structure and biogenesis	Molecular Function: methionyl-tRNA formyltransferase activity (GO:0004479);; Cellular Component: mitochondrial matrix (GO:0005759);; Biological Process: mitochondrial translational initiation (GO:0070124);; Biological Process: conversion of methionyl-tRNA to N-formyl-methionyl-tRNA (GO:0071951);;	K00604|1.00746e-147|ssc:100513511|K00604 methionyl-tRNA formyltransferase [EC:2.1.2.9] | (RefSeq) MTFMT; mitochondrial methionyl-tRNA formyltransferase	One carbon pool by folate (ko00670);; Aminoacyl-tRNA biosynthesis (ko00970)	[J]	Translation, ribosomal structure and biogenesis	Formyl transferase, C-terminal domain	Methionyl-tRNA formyltransferase, mitochondrial OS=Bos taurus OX=9913 GN=MTFMT PE=1 SV=2	methionyl-tRNA formyltransferase, mitochondrial [Sus scrofa]
ONT.438.2	--	--	Cellular Component: cytoplasm (GO:0005737);;	K19367|1.94538e-71|bacu:103002672|K19367 maspardin | (RefSeq) SPG21; spastic paraplegia 21 (autosomal recessive, Mast syndrome)	Endocytosis (ko04144)	--	--	--	Maspardin OS=Bos taurus OX=9913 GN=SPG21 PE=2 SV=1	PREDICTED: maspardin [Orcinus orca]
ONT.440.2	--	--	--	--	--	--	--	--	--	--
ONT.440.3	--	--	--	--	--	--	--	--	--	--
ONT.442.1	--	--	Cellular Component: cytosol (GO:0005829);; Biological Process: polyamine metabolic process (GO:0006595);; Molecular Function: ornithine decarboxylase inhibitor activity (GO:0008073);; Biological Process: negative regulation of catalytic activity (GO:0043086);; Biological Process: positive regulation of protein catabolic process (GO:0045732);; Biological Process: positive regulation of intracellul…	K16613|4.48769e-58|ssc:100144447|K16613 ornithine decarboxylase antizyme 2 | (RefSeq) OAZ2; ornithine decarboxylase antizyme 2	--	[E]	Amino acid transport and metabolism	--	Ornithine decarboxylase antizyme 2 OS=Pongo abelii OX=9601 GN=OAZ2 PE=2 SV=1	ornithine decarboxylase antizyme 2 [Loxodonta africana]
ONT.442.3	--	--	Biological Process: regulation of biological process (GO:0050789);;	K16613|1.9455e-47|ngi:103736770|K16613 ornithine decarboxylase antizyme 2 | (RefSeq) Oaz2; ornithine decarboxylase antizyme 2	--	[E]	Amino acid transport and metabolism	--	Ornithine decarboxylase antizyme 2 OS=Pongo abelii OX=9601 GN=OAZ2 PE=2 SV=1	PREDICTED: LOW QUALITY PROTEIN: ornithine decarboxylase antizyme 2 [Bison bison bison]
ONT.442.5	--	--	Biological Process: positive regulation of biological process (GO:0048518);; Biological Process: regulation of transport (GO:0051049);; Biological Process: organic substance transport (GO:0071702);; Biological Process: organic substance metabolic process (GO:0071704);; Molecular Function: organic cyclic compound binding (GO:0097159);; Molecular Function: heterocyclic compound binding (GO:1901363)…	K16613|6.41907e-15|ptg:102964344|K16613 ornithine decarboxylase antizyme 2 | (RefSeq) OAZ2; ornithine decarboxylase antizyme 2	--	[E]	Amino acid transport and metabolism	--	Ornithine decarboxylase antizyme 2 OS=Pongo abelii OX=9601 GN=OAZ2 PE=2 SV=1	ornithine decarboxylase antizyme 2 [Loxodonta africana]
ONT.444.1	--	--	--	--	--	--	--	--	--	--
ONT.445.1	--	--	--	--	--	--	--	--	--	--
ONT.446.2	--	--	Molecular Function: protein binding (GO:0005515);; Biological Process: transcription, DNA-templated (GO:0006351);; Cellular Component: intracellular part (GO:0044424);; Biological Process: regulation of cellular process (GO:0050794);;	--	--	[K]	Transcription	ASCH domain	--	activating signal cointegrator 1 isoform X4 [Sus scrofa]
ONT.449.1	[O]	Posttranslational modification, protein turnover, chaperones	Biological Process: protein peptidyl-prolyl isomerization (GO:0000413);; Molecular Function: peptidyl-prolyl cis-trans isomerase activity (GO:0003755);; Cellular Component: nucleus (GO:0005634);; Cellular Component: endoplasmic reticulum lumen (GO:0005788);; Cellular Component: focal adhesion (GO:0005925);; Cellular Component: membrane (GO:0016020);; Molecular Function: protein complex binding (G…	K03768|4.56355e-81|mdo:100017245|K03768 peptidyl-prolyl cis-trans isomerase B (cyclophilin B) [EC:5.2.1.8] | (RefSeq) PPIB; peptidylprolyl isomerase B	--	[O]	Posttranslational modification, protein turnover, chaperones	Cyclophilin type peptidyl-prolyl cis-trans isomerase/CLD	Peptidyl-prolyl cis-trans isomerase B OS=Bos taurus OX=9913 GN=PPIB PE=1 SV=4	PREDICTED: peptidyl-prolyl cis-trans isomerase B [Monodelphis domestica]
ONT.449.2	--	--	Molecular Function: binding (GO:0005488);; Biological Process: cellular process (GO:0009987);; Cellular Component: intracellular membrane-bounded organelle (GO:0043231);; Cellular Component: cytoplasmic part (GO:0044444);; Biological Process: biological regulation (GO:0065007);;	K03768|2.01587e-26|bta:281419|K03768 peptidyl-prolyl cis-trans isomerase B (cyclophilin B) [EC:5.2.1.8] | (RefSeq) PPIB; peptidylprolyl isomerase B	--	[O]	Posttranslational modification, protein turnover, chaperones	--	Peptidyl-prolyl cis-trans isomerase B OS=Bos taurus OX=9913 GN=PPIB PE=1 SV=4	peptidyl-prolyl cis-trans isomerase B precursor [Bos taurus]
ONT.449.3	[O]	Posttranslational modification, protein turnover, chaperones	Biological Process: protein peptidyl-prolyl isomerization (GO:0000413);; Molecular Function: peptidyl-prolyl cis-trans isomerase activity (GO:0003755);; Cellular Component: nucleus (GO:0005634);; Cellular Component: endoplasmic reticulum lumen (GO:0005788);; Cellular Component: focal adhesion (GO:0005925);; Cellular Component: membrane (GO:0016020);; Molecular Function: protein complex binding (G…	K03768|4.24179e-71|ssc:100154783|K03768 peptidyl-prolyl cis-trans isomerase B (cyclophilin B) [EC:5.2.1.8] | (RefSeq) peptidyl-prolyl cis-trans isomerase B	--	[O]	Posttranslational modification, protein turnover, chaperones	Cyclophilin type peptidyl-prolyl cis-trans isomerase/CLD	Peptidyl-prolyl cis-trans isomerase B OS=Bos taurus OX=9913 GN=PPIB PE=1 SV=4	peptidyl-prolyl cis-trans isomerase B isoform X2 [Myotis lucifugus]
ONT.449.5	[O]	Posttranslational modification, protein turnover, chaperones	Biological Process: protein peptidyl-prolyl isomerization (GO:0000413);; Molecular Function: peptidyl-prolyl cis-trans isomerase activity (GO:0003755);; Molecular Function: protein serine/threonine kinase activity (GO:0004674);; Molecular Function: ATP binding (GO:0005524);; Cellular Component: nucleus (GO:0005634);; Cellular Component: focal adhesion (GO:0005925);; Biological Process: protein ph…	K03768|3.16483e-61|ssc:100154783|K03768 peptidyl-prolyl cis-trans isomerase B (cyclophilin B) [EC:5.2.1.8] | (RefSeq) peptidyl-prolyl cis-trans isomerase B	--	[O]	Posttranslational modification, protein turnover, chaperones	Cyclophilin type peptidyl-prolyl cis-trans isomerase/CLD	Peptidyl-prolyl cis-trans isomerase B OS=Bos taurus OX=9913 GN=PPIB PE=1 SV=4	Casein kinase I isoform gamma-1 [Myotis brandtii]
ONT.449.6	[O]	Posttranslational modification, protein turnover, chaperones	Biological Process: protein peptidyl-prolyl isomerization (GO:0000413);; Molecular Function: peptidyl-prolyl cis-trans isomerase activity (GO:0003755);; Molecular Function: protein serine/threonine kinase activity (GO:0004674);; Molecular Function: ATP binding (GO:0005524);; Cellular Component: nucleus (GO:0005634);; Cellular Component: focal adhesion (GO:0005925);; Biological Process: protein ph…	K03768|1.16303e-55|ssc:100737887|K03768 peptidyl-prolyl cis-trans isomerase B (cyclophilin B) [EC:5.2.1.8] | (RefSeq) PPIB; peptidylprolyl isomerase B	--	[O]	Posttranslational modification, protein turnover, chaperones	Cyclophilin type peptidyl-prolyl cis-trans isomerase/CLD	Peptidyl-prolyl cis-trans isomerase B OS=Bos taurus OX=9913 GN=PPIB PE=1 SV=4	PREDICTED: peptidyl-prolyl cis-trans isomerase B [Mustela putorius furo]
ONT.449.7	--	--	Biological Process: protein peptidyl-prolyl isomerization (GO:0000413);; Molecular Function: peptidyl-prolyl cis-trans isomerase activity (GO:0003755);; Cellular Component: nucleus (GO:0005634);; Cellular Component: endoplasmic reticulum lumen (GO:0005788);; Cellular Component: focal adhesion (GO:0005925);; Cellular Component: membrane (GO:0016020);; Molecular Function: protein complex binding (G…	K03768|3.96097e-21|ssc:100737887|K03768 peptidyl-prolyl cis-trans isomerase B (cyclophilin B) [EC:5.2.1.8] | (RefSeq) PPIB; peptidylprolyl isomerase B	--	[O]	Posttranslational modification, protein turnover, chaperones	--	Peptidyl-prolyl cis-trans isomerase B OS=Bos taurus OX=9913 GN=PPIB PE=1 SV=4	similar to cyclophilin B, partial [Bos taurus]
ONT.451.1	--	--	Molecular Function: receptor binding (GO:0005102);; Biological Process: cellular process (GO:0009987);; Cellular Component: endomembrane system (GO:0012505);; Cellular Component: membrane (GO:0016020);; Biological Process: vesicle-mediated transport (GO:0016192);; Cellular Component: membrane-bounded organelle (GO:0043227);; Cellular Component: intracellular organelle (GO:0043229);; Cellular Comp…	K17917|5.36612e-130|ocu:100338927|K17917 sorting nexin-1/2 | (RefSeq) SNX1; sorting nexin 1	Endocytosis (ko04144)	[U]	Intracellular trafficking, secretion, and vesicular transport	Vps5 C terminal like;; Vps5 C terminal like	Sorting nexin-1 OS=Pongo abelii OX=9601 GN=SNX1 PE=2 SV=1	PREDICTED: sorting nexin-1 isoform X2 [Rousettus aegyptiacus]
ONT.451.7	--	--	Molecular Function: receptor binding (GO:0005102);; Cellular Component: endosome (GO:0005768);; Biological Process: cellular process (GO:0009987);; Cellular Component: membrane (GO:0016020);; Biological Process: vesicle-mediated transport (GO:0016192);; Biological Process: intracellular transport (GO:0046907);;	K17917|7.13785e-123|ptr:453503|K17917 sorting nexin-1/2 | (RefSeq) SNX1; sorting nexin 1	Endocytosis (ko04144)	[U]	Intracellular trafficking, secretion, and vesicular transport	Sorting nexin, N-terminal domain;; Vps5 C terminal like;; PX domain	Sorting nexin-1 OS=Bos taurus OX=9913 GN=SNX1 PE=2 SV=1	sorting nexin-1 [Sus scrofa]
ONT.451.10	--	--	Molecular Function: protein binding (GO:0005515);; Cellular Component: cytoplasm (GO:0005737);; Cellular Component: membrane (GO:0016020);; Biological Process: vesicle-mediated transport (GO:0016192);;	K17917|7.28917e-77|bacu:102998641|K17917 sorting nexin-1/2 | (RefSeq) SNX1; sorting nexin 1	Endocytosis (ko04144)	[U]	Intracellular trafficking, secretion, and vesicular transport	Sorting nexin, N-terminal domain	Sorting nexin-1 OS=Pongo abelii OX=9601 GN=SNX1 PE=2 SV=1	sorting nexin-1 [Sus scrofa]
ONT.452.1	--	--	--	--	--	[S]	Function unknown	--	MIP18 family protein FAM96A OS=Bos taurus OX=9913 GN=FAM96A PE=2 SV=1	MIP18 family protein FAM96A isoform X1 [Sus scrofa]
ONT.452.3	--	--	Cellular Component: nucleus (GO:0005634);; Cellular Component: cytoplasm (GO:0005737);; Biological Process: chromosome segregation (GO:0007059);; Biological Process: iron-sulfur cluster assembly (GO:0016226);;	--	--	[S]	Function unknown	--	MIP18 family protein FAM96A OS=Bos taurus OX=9913 GN=FAM96A PE=2 SV=1	MIP18 family protein FAM96A isoform X1 [Dasypus novemcinctus]
ONT.453.1	--	--	--	--	--	--	--	--	--	--
ONT.454.1	[T]	Signal transduction mechanisms	Molecular Function: nucleotide binding (GO:0000166);; Molecular Function: protein kinase activity (GO:0004672);; Molecular Function: protein binding (GO:0005515);; Biological Process: apoptotic process (GO:0006915);; Biological Process: phosphorylation (GO:0016310);; Biological Process: intracellular signal transduction (GO:0035556);; Biological Process: positive regulation of granulocyte chemota…	K08803|3.95311e-106|mmu:13143|K08803 death-associated protein kinase [EC:2.7.11.1] | (RefSeq) Dapk2; death-associated protein kinase 2	Pathways in cancer (ko05200);; Bladder cancer (ko05219)	[T]	Signal transduction mechanisms	--	Myosin light chain kinase, smooth muscle (Fragment) OS=Ovis aries OX=9940 GN=MYLK PE=2 SV=1	PREDICTED: death-associated protein kinase 2 isoform X3 [Acinonyx jubatus]
ONT.454.2	--	--	Molecular Function: binding (GO:0005488);; Molecular Function: transferase activity (GO:0016740);; Biological Process: single-organism cellular process (GO:0044763);;	K08803|1.25529e-73|mdo:100023465|K08803 death-associated protein kinase [EC:2.7.11.1] | (RefSeq) DAPK2; death associated protein kinase 2	Pathways in cancer (ko05200);; Bladder cancer (ko05219)	[T]	Signal transduction mechanisms	Protein kinase domain	Myosin light chain kinase, smooth muscle (Fragment) OS=Ovis aries OX=9940 GN=MYLK PE=2 SV=1	PREDICTED: death-associated protein kinase 2 [Galeopterus variegatus]
ONT.454.5	[T]	Signal transduction mechanisms	Molecular Function: protein serine/threonine kinase activity (GO:0004674);; Molecular Function: calmodulin binding (GO:0005516);; Molecular Function: ATP binding (GO:0005524);; Cellular Component: cytoplasm (GO:0005737);; Biological Process: protein phosphorylation (GO:0006468);; Molecular Function: identical protein binding (GO:0042802);; Biological Process: anoikis (GO:0043276);; Biological Pro…	K08803|8.6184e-159|rro:104655916|K08803 death-associated protein kinase [EC:2.7.11.1] | (RefSeq) DAPK2; death associated protein kinase 2	Pathways in cancer (ko05200);; Bladder cancer (ko05219)	[T]	Signal transduction mechanisms	Protein kinase domain	Myosin light chain kinase, smooth muscle OS=Bos taurus OX=9913 GN=MYLK PE=1 SV=1	death-associated protein kinase 3 [Camelus ferus]
ONT.454.6	--	--	--	--	--	--	--	--	--	--
ONT.454.7	--	--	--	--	--	--	--	--	--	uncharacterized protein LOC100620498 isoform X8 [Sus scrofa]
ONT.454.8	--	--	--	--	--	--	--	--	--	--
ONT.454.9	--	--	Biological Process: tissue development (GO:0009888);; Biological Process: single-organism cellular process (GO:0044763);; Biological Process: developmental growth (GO:0048589);;	--	--	--	--	--	--	bridging integrator 3 isoform X3 [Sus scrofa]
ONT.455.1	--	--	--	--	--	--	--	--	--	--
ONT.455.2	--	--	--	--	--	--	--	--	--	--
ONT.457.1	--	--	--	K10594|9.90201e-66|rro:104655915|K10594 E3 ubiquitin-protein ligase HERC1 [EC:2.3.2.26] | (RefSeq) HERC1; HECT and RLD domain containing E3 ubiquitin protein ligase family member 1	Ubiquitin mediated proteolysis (ko04120)	[S]	Function unknown	HECT-domain (ubiquitin-transferase);; HECT-domain (ubiquitin-transferase)	--	HERC1 [Cervus elaphus hippelaphus]
ONT.457.2	--	--	--	K10594|1.13642e-71|ssc:100153537|K10594 E3 ubiquitin-protein ligase HERC1 [EC:2.3.2.26] | (RefSeq) HERC1; HECT and RLD domain containing E3 ubiquitin protein ligase family member 1	Ubiquitin mediated proteolysis (ko04120)	[S]	Function unknown	HECT-domain (ubiquitin-transferase)	--	Putative E3 ubiquitin-protein ligase HERC1, partial [Bos mutus]
ONT.457.3	--	--	Molecular Function: catalytic activity (GO:0003824);; Biological Process: neuron differentiation (GO:0030182);;	K10594|9.34986e-94|ggo:101150684|K10594 E3 ubiquitin-protein ligase HERC1 [EC:2.3.2.26] | (RefSeq) HERC1; HECT and RLD domain containing E3 ubiquitin protein ligase family member 1	Ubiquitin mediated proteolysis (ko04120)	[S]	Function unknown	HECT-domain (ubiquitin-transferase);; HECT-domain (ubiquitin-transferase)	--	Putative E3 ubiquitin-protein ligase HERC1 [Myotis davidii]
ONT.459.1	--	--	Biological Process: proteolysis (GO:0006508);; Molecular Function: peptidase activity (GO:0008233);; Cellular Component: intracellular membrane-bounded organelle (GO:0043231);; Biological Process: cellular protein metabolic process (GO:0044267);;	K11986|4.1007e-74|bta:529395|K11986 ubiquitin carboxyl-terminal hydrolase 3 [EC:3.4.19.12] | (RefSeq) USP3; ubiquitin specific peptidase 3	--	[O]	Posttranslational modification, protein turnover, chaperones	Ubiquitin carboxyl-terminal hydrolase	Ubiquitin carboxyl-terminal hydrolase 44 OS=Ailuropoda melanoleuca OX=9646 GN=USP44 PE=3 SV=1	ubiquitin carboxyl-terminal hydrolase 3 [Bos taurus]
ONT.460.1	--	--	--	--	--	--	--	--	--	--
ONT.462.1	[J]	Translation, ribosomal structure and biogenesis	Biological Process: ribosomal small subunit assembly (GO:0000028);; Molecular Function: structural constituent of ribosome (GO:0003735);; Cellular Component: nucleus (GO:0005634);; Biological Process: DNA repair (GO:0006281);; Biological Process: activation of cysteine-type endopeptidase activity involved in apoptotic process (GO:0006919);; Molecular Function: translation activator activity (GO:0…	K02978|1.9439e-41|asn:102373247|K02978 small subunit ribosomal protein S27e | (RefSeq) RPS27L; ribosomal protein S27 like	Ribosome (ko03010)	[J]	Translation, ribosomal structure and biogenesis	Ribosomal protein S27	40S ribosomal protein S27 OS=Bos taurus OX=9913 GN=RPS27 PE=3 SV=3	PREDICTED: 40S ribosomal protein S27-like isoform X1 [Bos taurus]
ONT.462.2	[J]	Translation, ribosomal structure and biogenesis	Biological Process: ribosomal small subunit assembly (GO:0000028);; Molecular Function: structural constituent of ribosome (GO:0003735);; Cellular Component: nucleus (GO:0005634);; Biological Process: DNA repair (GO:0006281);; Biological Process: activation of cysteine-type endopeptidase activity involved in apoptotic process (GO:0006919);; Molecular Function: translation activator activity (GO:0…	K02978|1.17376e-48|cfa:610569|K02978 small subunit ribosomal protein S27e | (RefSeq) RPS27L; ribosomal protein S27 like	Ribosome (ko03010)	[J]	Translation, ribosomal structure and biogenesis	Ribosomal protein S27	40S ribosomal protein S27-like OS=Bos taurus OX=9913 GN=RPS27L PE=3 SV=3	PREDICTED: 40S ribosomal protein S27-like [Rhinolophus sinicus]
ONT.462.3	--	--	Biological Process: ribosomal small subunit assembly (GO:0000028);; Molecular Function: structural constituent of ribosome (GO:0003735);; Cellular Component: nucleus (GO:0005634);; Biological Process: DNA repair (GO:0006281);; Biological Process: activation of cysteine-type endopeptidase activity involved in apoptotic process (GO:0006919);; Molecular Function: translation activator activity (GO:0…	K02978|5.92994e-23|crg:105323167|K02978 small subunit ribosomal protein S27e | (RefSeq) rps27-1; 40S ribosomal protein S27-like	Ribosome (ko03010)	[J]	Translation, ribosomal structure and biogenesis	--	40S ribosomal protein S27-like OS=Bos taurus OX=9913 GN=RPS27L PE=3 SV=3	PREDICTED: 40S ribosomal protein S27-like isoform X1 [Bos taurus]
ONT.462.4	--	--	Biological Process: ribosomal small subunit assembly (GO:0000028);; Molecular Function: structural constituent of ribosome (GO:0003735);; Cellular Component: nucleus (GO:0005634);; Biological Process: DNA repair (GO:0006281);; Biological Process: activation of cysteine-type endopeptidase activity involved in apoptotic process (GO:0006919);; Molecular Function: translation activator activity (GO:0…	K02978|5.4215e-31|xtr:100127556|K02978 small subunit ribosomal protein S27e | (RefSeq) rps27, mps-1, mps1, rps27.2; ribosomal protein S27	Ribosome (ko03010)	[J]	Translation, ribosomal structure and biogenesis	--	40S ribosomal protein S27-like OS=Bos taurus OX=9913 GN=RPS27L PE=3 SV=3	PREDICTED: 40S ribosomal protein S27-like isoform X1 [Bos taurus]
ONT.463.1	[V]	Defense mechanisms	Cellular Component: mitochondrion (GO:0005739);; Molecular Function: hydrolase activity (GO:0016787);;	K17382|2.95251e-88|chx:102172902|K17382 serine beta-lactamase-like protein LACTB, mitochondrial | (RefSeq) LACTB; lactamase beta	--	--	--	--	Serine beta-lactamase-like protein LACTB, mitochondrial OS=Bos taurus OX=9913 GN=LACTB PE=1 SV=2	PREDICTED: serine beta-lactamase-like protein LACTB, mitochondrial, partial [Bos mutus]
ONT.464.1	--	--	--	--	--	--	--	--	--	--
ONT.465.1	--	--	--	--	--	--	--	--	--	--
ONT.467.1	--	--	--	--	--	--	--	--	--	--
ONT.468.1	--	--	--	--	--	--	--	--	--	--
ONT.469.1	--	--	Cellular Component: stress fiber (GO:0001725);; Molecular Function: actin binding (GO:0003779);; Cellular Component: cytoplasm (GO:0005737);; Biological Process: regulation of ATPase activity (GO:0043462);; Cellular Component: extracellular exosome (GO:0070062);;	K10373|1.18121e-49|myb:102250595|K10373 tropomyosin 1 | (RefSeq) TPM1; tropomyosin 1 (alpha)	Cardiac muscle contraction (ko04260);; Adrenergic signaling in cardiomyocytes (ko04261);; MicroRNAs in cancer (ko05206);; Hypertrophic cardiomyopathy (HCM) (ko05410);; Dilated cardiomyopathy (ko05414)	[Z]	Cytoskeleton	--	Tropomyosin alpha-4 chain OS=Equus caballus OX=9796 GN=TPM4 PE=1 SV=2	tropomyosin beta chain isoform X2 [Phascolarctos cinereus]
ONT.469.3	--	--	Biological Process: osteoblast differentiation (GO:0001649);; Cellular Component: stress fiber (GO:0001725);; Cellular Component: podosome (GO:0002102);; Molecular Function: actin binding (GO:0003779);; Cellular Component: focal adhesion (GO:0005925);; Cellular Component: membrane (GO:0016020);; Cellular Component: cortical cytoskeleton (GO:0030863);; Cellular Component: filamentous actin (GO:003…	K10375|4.74067e-78|fch:102055978|K10375 tropomyosin 4 | (RefSeq) TPM4, RAB8A; tropomyosin 4	Cardiac muscle contraction (ko04260);; Adrenergic signaling in cardiomyocytes (ko04261)	[Z]	Cytoskeleton	Tropomyosin;; Tropomyosin like;; Tropomyosin like;; Tropomyosin	Tropomyosin beta chain OS=Oryctolagus cuniculus OX=9986 GN=TPM2 PE=1 SV=1	Tropomyosin alpha-1 chain [Pteropus alecto]
ONT.469.4	--	--	Biological Process: in utero embryonic development (GO:0001701);; Cellular Component: stress fiber (GO:0001725);; Biological Process: positive regulation of heart rate by epinephrine (GO:0003065);; Molecular Function: cytoskeletal protein binding (GO:0008092);; Biological Process: regulation of cell shape (GO:0008360);; Cellular Component: myofibril (GO:0030016);; Cellular Component: filamentous …	K10373|1.94636e-46|myd:102760570|K10373 tropomyosin 1 | (RefSeq) TPM1; tropomyosin 1 (alpha)	Cardiac muscle contraction (ko04260);; Adrenergic signaling in cardiomyocytes (ko04261);; MicroRNAs in cancer (ko05206);; Hypertrophic cardiomyopathy (HCM) (ko05410);; Dilated cardiomyopathy (ko05414)	[Z]	Cytoskeleton	Tropomyosin like;; Tropomyosin;; Tropomyosin	Tropomyosin alpha-3 chain OS=Bos taurus OX=9913 GN=TPM3 PE=2 SV=1	PREDICTED: tropomyosin alpha-1 chain isoform X4 [Bison bison bison]
ONT.469.5	--	--	Biological Process: in utero embryonic development (GO:0001701);; Cellular Component: stress fiber (GO:0001725);; Biological Process: positive regulation of heart rate by epinephrine (GO:0003065);; Molecular Function: cytoskeletal protein binding (GO:0008092);; Biological Process: regulation of cell shape (GO:0008360);; Cellular Component: myofibril (GO:0030016);; Cellular Component: filamentous …	K10373|9.58345e-67|chx:102173472|K10373 tropomyosin 1 | (RefSeq) TPM1; tropomyosin 1 (alpha)	Cardiac muscle contraction (ko04260);; Adrenergic signaling in cardiomyocytes (ko04261);; MicroRNAs in cancer (ko05206);; Hypertrophic cardiomyopathy (HCM) (ko05410);; Dilated cardiomyopathy (ko05414)	[Z]	Cytoskeleton	Tropomyosin	Tropomyosin alpha-1 chain OS=Bos taurus OX=9913 GN=TPM1 PE=2 SV=1	tropomyosin alpha-1 chain isoform X12 [Canis lupus familiaris]
ONT.469.6	--	--	Cellular Component: cytoskeleton (GO:0005856);; Biological Process: anatomical structure morphogenesis (GO:0009653);; Biological Process: single-multicellular organism process (GO:0044707);; Biological Process: single-organism cellular process (GO:0044763);; Biological Process: single-organism developmental process (GO:0044767);; Biological Process: regulation of cellular process (GO:0050794);;	K10373|1.85132e-33|lve:103084698|K10373 tropomyosin 1 | (RefSeq) TPM1; tropomyosin 1 (alpha)	Cardiac muscle contraction (ko04260);; Adrenergic signaling in cardiomyocytes (ko04261);; MicroRNAs in cancer (ko05206);; Hypertrophic cardiomyopathy (HCM) (ko05410);; Dilated cardiomyopathy (ko05414)	[Z]	Cytoskeleton	--	Tropomyosin alpha-1 chain OS=Bos taurus OX=9913 GN=TPM1 PE=2 SV=1	PREDICTED: tropomyosin alpha-1 chain isoform X1 [Sorex araneus]
ONT.469.7	--	--	Biological Process: cellular process (GO:0009987);; Biological Process: multicellular organismal process (GO:0032501);; Cellular Component: intracellular non-membrane-bounded organelle (GO:0043232);; Biological Process: single-organism developmental process (GO:0044767);; Biological Process: anatomical structure development (GO:0048856);; Biological Process: regulation of biological process (GO:0…	K10373|1.4703e-48|fca:101091450|K10373 tropomyosin 1 | (RefSeq) TPM1; tropomyosin 1 (alpha)	Cardiac muscle contraction (ko04260);; Adrenergic signaling in cardiomyocytes (ko04261);; MicroRNAs in cancer (ko05206);; Hypertrophic cardiomyopathy (HCM) (ko05410);; Dilated cardiomyopathy (ko05414)	[Z]	Cytoskeleton	Tropomyosin;; Tropomyosin	Tropomyosin alpha-1 chain OS=Bos taurus OX=9913 GN=TPM1 PE=2 SV=1	tropomyosin alpha-1 chain isoform X18 [Sus scrofa]
ONT.469.8	--	--	--	--	--	[Z]	Cytoskeleton	--	--	hypothetical protein MDA_GLEAN10015339 [Myotis davidii]
ONT.469.13	--	--	Biological Process: in utero embryonic development (GO:0001701);; Cellular Component: stress fiber (GO:0001725);; Biological Process: positive regulation of heart rate by epinephrine (GO:0003065);; Molecular Function: cytoskeletal protein binding (GO:0008092);; Biological Process: regulation of cell shape (GO:0008360);; Cellular Component: myofibril (GO:0030016);; Cellular Component: filamentous …	K09290|1.2393e-43|bacu:103002139|K09290 tropomyosin 3 | (RefSeq) tropomyosin alpha-3 chain-like	Cardiac muscle contraction (ko04260);; Adrenergic signaling in cardiomyocytes (ko04261);; Pathways in cancer (ko05200);; Thyroid cancer (ko05216);; Hypertrophic cardiomyopathy (HCM) (ko05410);; Dilated cardiomyopathy (ko05414)	[Z]	Cytoskeleton	Tropomyosin;; Tropomyosin like	Tropomyosin alpha-4 chain OS=Sus scrofa OX=9823 GN=TPM4 PE=2 SV=3	tropomyosin alpha-1 chain isoform X15 [Equus caballus]
ONT.469.22	--	--	Biological Process: in utero embryonic development (GO:0001701);; Biological Process: positive regulation of heart rate by epinephrine (GO:0003065);; Molecular Function: structural constituent of cytoskeleton (GO:0005200);; Cellular Component: muscle thin filament tropomyosin (GO:0005862);; Biological Process: muscle filament sliding (GO:0030049);; Biological Process: negative regulation of cell …	K10373|1.2206e-39|oas:100145865|K10373 tropomyosin 1 | (RefSeq) TPM1; tropomyosin 1 (alpha)	Cardiac muscle contraction (ko04260);; Adrenergic signaling in cardiomyocytes (ko04261);; MicroRNAs in cancer (ko05206);; Hypertrophic cardiomyopathy (HCM) (ko05410);; Dilated cardiomyopathy (ko05414)	[Z]	Cytoskeleton	Tropomyosin;; Tropomyosin like	Tropomyosin alpha-1 chain OS=Bos taurus OX=9913 GN=TPM1 PE=2 SV=1	PREDICTED: tropomyosin alpha-4 chain isoform X2 [Pantholops hodgsonii]
ONT.469.19	--	--	Biological Process: in utero embryonic development (GO:0001701);; Cellular Component: stress fiber (GO:0001725);; Biological Process: positive regulation of heart rate by epinephrine (GO:0003065);; Molecular Function: structural constituent of cytoskeleton (GO:0005200);; Cellular Component: muscle thin filament tropomyosin (GO:0005862);; Molecular Function: structural constituent of muscle (GO:00…	K10373|1.82581e-69|oas:100145865|K10373 tropomyosin 1 | (RefSeq) TPM1; tropomyosin 1 (alpha)	Cardiac muscle contraction (ko04260);; Adrenergic signaling in cardiomyocytes (ko04261);; MicroRNAs in cancer (ko05206);; Hypertrophic cardiomyopathy (HCM) (ko05410);; Dilated cardiomyopathy (ko05414)	[Z]	Cytoskeleton	Tropomyosin like;; Fungal Nap binding protein NBP1	Tropomyosin alpha-1 chain OS=Bos taurus OX=9913 GN=TPM1 PE=2 SV=1	PREDICTED: tropomyosin alpha-1 chain isoform X2 [Vicugna pacos]
ONT.469.25	--	--	Biological Process: in utero embryonic development (GO:0001701);; Cellular Component: stress fiber (GO:0001725);; Biological Process: positive regulation of heart rate by epinephrine (GO:0003065);; Molecular Function: structural constituent of cytoskeleton (GO:0005200);; Cellular Component: muscle thin filament tropomyosin (GO:0005862);; Molecular Function: structural constituent of muscle (GO:00…	K10373|2.69702e-81|oas:100145865|K10373 tropomyosin 1 | (RefSeq) TPM1; tropomyosin 1 (alpha)	Cardiac muscle contraction (ko04260);; Adrenergic signaling in cardiomyocytes (ko04261);; MicroRNAs in cancer (ko05206);; Hypertrophic cardiomyopathy (HCM) (ko05410);; Dilated cardiomyopathy (ko05414)	[Z]	Cytoskeleton	Tropomyosin like;; Tropomyosin;; C-terminal leucine zipper domain of cyclic nucleotide-gated channels	Tropomyosin alpha-1 chain OS=Bos taurus OX=9913 GN=TPM1 PE=2 SV=1	tropomyosin alpha-1 chain [Bos taurus]
ONT.469.28	--	--	Biological Process: in utero embryonic development (GO:0001701);; Cellular Component: stress fiber (GO:0001725);; Biological Process: positive regulation of heart rate by epinephrine (GO:0003065);; Molecular Function: structural constituent of cytoskeleton (GO:0005200);; Cellular Component: muscle thin filament tropomyosin (GO:0005862);; Molecular Function: structural constituent of muscle (GO:00…	K10373|4.30334e-57|rro:104670859|K10373 tropomyosin 1 | (RefSeq) TPM1; tropomyosin 1 (alpha)	Cardiac muscle contraction (ko04260);; Adrenergic signaling in cardiomyocytes (ko04261);; MicroRNAs in cancer (ko05206);; Hypertrophic cardiomyopathy (HCM) (ko05410);; Dilated cardiomyopathy (ko05414)	[Z]	Cytoskeleton	--	Tropomyosin alpha-1 chain OS=Oryctolagus cuniculus OX=9986 GN=TPM1 PE=1 SV=1	tropomyosin alpha-1 chain isoform X1 [Physeter catodon]
ONT.469.31	--	--	Cellular Component: cytoskeleton (GO:0005856);; Biological Process: anatomical structure morphogenesis (GO:0009653);; Biological Process: single-multicellular organism process (GO:0044707);; Biological Process: single-organism cellular process (GO:0044763);; Biological Process: single-organism developmental process (GO:0044767);; Biological Process: regulation of cellular process (GO:0050794);;	K09290|2.78964e-52|cge:100763482|K09290 tropomyosin 3 | (RefSeq) Tpm3; tropomyosin 3	Cardiac muscle contraction (ko04260);; Adrenergic signaling in cardiomyocytes (ko04261);; Pathways in cancer (ko05200);; Thyroid cancer (ko05216);; Hypertrophic cardiomyopathy (HCM) (ko05410);; Dilated cardiomyopathy (ko05414)	[Z]	Cytoskeleton	Tropomyosin;; Tropomyosin like	Tropomyosin alpha-1 chain OS=Bos taurus OX=9913 GN=TPM1 PE=2 SV=1	PREDICTED: tropomyosin alpha-1 chain isoform X2 [Bos mutus]
ONT.469.33	--	--	Cellular Component: cytoskeleton (GO:0005856);; Biological Process: anatomical structure morphogenesis (GO:0009653);; Biological Process: single-multicellular organism process (GO:0044707);; Biological Process: single-organism cellular process (GO:0044763);; Biological Process: single-organism developmental process (GO:0044767);; Biological Process: regulation of cellular process (GO:0050794);;	K09290|3.18413e-68|tup:102489298|K09290 tropomyosin 3 | (RefSeq) TPM3; tropomyosin 3	Cardiac muscle contraction (ko04260);; Adrenergic signaling in cardiomyocytes (ko04261);; Pathways in cancer (ko05200);; Thyroid cancer (ko05216);; Hypertrophic cardiomyopathy (HCM) (ko05410);; Dilated cardiomyopathy (ko05414)	[Z]	Cytoskeleton	--	Tropomyosin alpha-3 chain OS=Bos taurus OX=9913 GN=TPM3 PE=2 SV=1	PREDICTED: tropomyosin alpha-3 chain isoform X7 [Monodelphis domestica]
ONT.469.34	--	--	--	--	--	--	--	--	--	--
ONT.469.35	--	--	Biological Process: in utero embryonic development (GO:0001701);; Biological Process: positive regulation of heart rate by epinephrine (GO:0003065);; Molecular Function: structural molecule activity (GO:0005198);; Cellular Component: myofibril (GO:0030016);; Biological Process: muscle filament sliding (GO:0030049);; Biological Process: negative regulation of cell migration (GO:0030336);; Biologic…	K10373|2.47936e-48|oas:100145865|K10373 tropomyosin 1 | (RefSeq) TPM1; tropomyosin 1 (alpha)	Cardiac muscle contraction (ko04260);; Adrenergic signaling in cardiomyocytes (ko04261);; MicroRNAs in cancer (ko05206);; Hypertrophic cardiomyopathy (HCM) (ko05410);; Dilated cardiomyopathy (ko05414)	[Z]	Cytoskeleton	--	Tropomyosin alpha-1 chain OS=Bos taurus OX=9913 GN=TPM1 PE=2 SV=1	tropomyosin alpha-1 chain [Bos taurus]
ONT.469.36	--	--	Biological Process: in utero embryonic development (GO:0001701);; Cellular Component: stress fiber (GO:0001725);; Biological Process: positive regulation of heart rate by epinephrine (GO:0003065);; Molecular Function: structural constituent of cytoskeleton (GO:0005200);; Cellular Component: muscle thin filament tropomyosin (GO:0005862);; Molecular Function: structural constituent of muscle (GO:00…	K10373|3.01689e-132|oas:100145865|K10373 tropomyosin 1 | (RefSeq) TPM1; tropomyosin 1 (alpha)	Cardiac muscle contraction (ko04260);; Adrenergic signaling in cardiomyocytes (ko04261);; MicroRNAs in cancer (ko05206);; Hypertrophic cardiomyopathy (HCM) (ko05410);; Dilated cardiomyopathy (ko05414)	[Z]	Cytoskeleton	Tropomyosin;; Tropomyosin like;; C-terminal leucine zipper domain of cyclic nucleotide-gated channels	Tropomyosin alpha-1 chain OS=Bos taurus OX=9913 GN=TPM1 PE=2 SV=1	tropomyosin alpha-1 chain [Bos taurus]
ONT.469.41	--	--	Biological Process: in utero embryonic development (GO:0001701);; Cellular Component: stress fiber (GO:0001725);; Biological Process: positive regulation of heart rate by epinephrine (GO:0003065);; Molecular Function: cytoskeletal protein binding (GO:0008092);; Biological Process: regulation of cell shape (GO:0008360);; Cellular Component: myofibril (GO:0030016);; Cellular Component: filamentous …	--	--	[Z]	Cytoskeleton	Tropomyosin;; Tropomyosin like	Tropomyosin alpha-1 chain OS=Sus scrofa OX=9823 GN=TPM1 PE=1 SV=2	PREDICTED: tropomyosin alpha-1 chain isoform X15 [Mustela putorius furo]
ONT.469.42	--	--	Biological Process: in utero embryonic development (GO:0001701);; Cellular Component: stress fiber (GO:0001725);; Biological Process: positive regulation of heart rate by epinephrine (GO:0003065);; Molecular Function: structural constituent of cytoskeleton (GO:0005200);; Cellular Component: muscle thin filament tropomyosin (GO:0005862);; Molecular Function: structural constituent of muscle (GO:00…	K10373|3.76283e-116|oas:100145865|K10373 tropomyosin 1 | (RefSeq) TPM1; tropomyosin 1 (alpha)	Cardiac muscle contraction (ko04260);; Adrenergic signaling in cardiomyocytes (ko04261);; MicroRNAs in cancer (ko05206);; Hypertrophic cardiomyopathy (HCM) (ko05410);; Dilated cardiomyopathy (ko05414)	[Z]	Cytoskeleton	Tropomyosin like;; Tropomyosin;; C-terminal leucine zipper domain of cyclic nucleotide-gated channels;; Tropomyosin	Tropomyosin alpha-1 chain OS=Bos taurus OX=9913 GN=TPM1 PE=2 SV=1	tropomyosin alpha-1 chain isoform X10 [Delphinapterus leucas]
ONT.469.46	--	--	Biological Process: in utero embryonic development (GO:0001701);; Cellular Component: stress fiber (GO:0001725);; Biological Process: positive regulation of heart rate by epinephrine (GO:0003065);; Molecular Function: actin binding (GO:0003779);; Biological Process: regulation of cell shape (GO:0008360);; Cellular Component: myofibril (GO:0030016);; Cellular Component: filamentous actin (GO:00319…	K10373|6.19093e-77|nle:100591881|K10373 tropomyosin 1 | (RefSeq) TPM1; tropomyosin 1 (alpha)	Cardiac muscle contraction (ko04260);; Adrenergic signaling in cardiomyocytes (ko04261);; MicroRNAs in cancer (ko05206);; Hypertrophic cardiomyopathy (HCM) (ko05410);; Dilated cardiomyopathy (ko05414)	[Z]	Cytoskeleton	Tropomyosin;; Tropomyosin like	Tropomyosin alpha-1 chain OS=Sus scrofa OX=9823 GN=TPM1 PE=1 SV=2	PREDICTED: tropomyosin alpha-1 chain [Acinonyx jubatus]
ONT.469.49	--	--	Biological Process: in utero embryonic development (GO:0001701);; Cellular Component: stress fiber (GO:0001725);; Biological Process: positive regulation of heart rate by epinephrine (GO:0003065);; Molecular Function: actin binding (GO:0003779);; Biological Process: regulation of cell shape (GO:0008360);; Cellular Component: myofibril (GO:0030016);; Cellular Component: filamentous actin (GO:00319…	K10373|1.5423e-71|oas:100145865|K10373 tropomyosin 1 | (RefSeq) TPM1; tropomyosin 1 (alpha)	Cardiac muscle contraction (ko04260);; Adrenergic signaling in cardiomyocytes (ko04261);; MicroRNAs in cancer (ko05206);; Hypertrophic cardiomyopathy (HCM) (ko05410);; Dilated cardiomyopathy (ko05414)	[Z]	Cytoskeleton	Tropomyosin;; Tropomyosin like;; C-terminal leucine zipper domain of cyclic nucleotide-gated channels;; Tropomyosin	Tropomyosin alpha-1 chain OS=Bos taurus OX=9913 GN=TPM1 PE=2 SV=1	TPA: tropomyosin 1 alpha chain, partial [Bos taurus]
ONT.469.51	--	--	Biological Process: in utero embryonic development (GO:0001701);; Cellular Component: stress fiber (GO:0001725);; Biological Process: positive regulation of heart rate by epinephrine (GO:0003065);; Molecular Function: actin binding (GO:0003779);; Biological Process: regulation of cell shape (GO:0008360);; Cellular Component: myofibril (GO:0030016);; Cellular Component: filamentous actin (GO:00319…	K10373|2.0916e-42|mcc:705236|K10373 tropomyosin 1 | (RefSeq) TPM1; tropomyosin 1 (alpha)	Cardiac muscle contraction (ko04260);; Adrenergic signaling in cardiomyocytes (ko04261);; MicroRNAs in cancer (ko05206);; Hypertrophic cardiomyopathy (HCM) (ko05410);; Dilated cardiomyopathy (ko05414)	[Z]	Cytoskeleton	--	Tropomyosin alpha-1 chain OS=Bos taurus OX=9913 GN=TPM1 PE=2 SV=1	PREDICTED: tropomyosin alpha-4 chain isoform X7 [Lipotes vexillifer]
ONT.469.55	--	--	Cellular Component: cytoskeleton (GO:0005856);; Biological Process: anatomical structure morphogenesis (GO:0009653);; Biological Process: single-multicellular organism process (GO:0044707);; Biological Process: single-organism cellular process (GO:0044763);; Biological Process: single-organism developmental process (GO:0044767);; Biological Process: regulation of cellular process (GO:0050794);;	K10373|1.02084e-26|mdo:100016737|K10373 tropomyosin 1 | (RefSeq) TPM1; tropomyosin 1 (alpha)	Cardiac muscle contraction (ko04260);; Adrenergic signaling in cardiomyocytes (ko04261);; MicroRNAs in cancer (ko05206);; Hypertrophic cardiomyopathy (HCM) (ko05410);; Dilated cardiomyopathy (ko05414)	[Z]	Cytoskeleton	--	Tropomyosin alpha-1 chain OS=Bos taurus OX=9913 GN=TPM1 PE=2 SV=1	PREDICTED: tropomyosin alpha-1 chain isoform X20 [Galeopterus variegatus]
ONT.469.56	--	--	Molecular Function: actin binding (GO:0003779);; Cellular Component: cytoplasm (GO:0005737);; Biological Process: multicellular organism development (GO:0007275);; Cellular Component: actin cytoskeleton (GO:0015629);; Biological Process: cellular component morphogenesis (GO:0032989);; Cellular Component: cell projection (GO:0042995);; Biological Process: regulation of ATPase activity (GO:0043462)…	K10373|9.59803e-39|shr:100928750|K10373 tropomyosin 1 | (RefSeq) TPM1; tropomyosin 1 (alpha)	Cardiac muscle contraction (ko04260);; Adrenergic signaling in cardiomyocytes (ko04261);; MicroRNAs in cancer (ko05206);; Hypertrophic cardiomyopathy (HCM) (ko05410);; Dilated cardiomyopathy (ko05414)	[Z]	Cytoskeleton	Tropomyosin like;; Tropomyosin;; Tropomyosin	Tropomyosin alpha-1 chain OS=Bos taurus OX=9913 GN=TPM1 PE=2 SV=1	tropomyosin beta chain isoform X1 [Delphinapterus leucas]
ONT.469.58	--	--	Biological Process: in utero embryonic development (GO:0001701);; Cellular Component: stress fiber (GO:0001725);; Biological Process: positive regulation of heart rate by epinephrine (GO:0003065);; Molecular Function: actin binding (GO:0003779);; Biological Process: regulation of cell shape (GO:0008360);; Cellular Component: myofibril (GO:0030016);; Cellular Component: filamentous actin (GO:00319…	K10373|1.59932e-53|cjc:100393554|K10373 tropomyosin 1 | (RefSeq) TPM1; tropomyosin 1 (alpha)	Cardiac muscle contraction (ko04260);; Adrenergic signaling in cardiomyocytes (ko04261);; MicroRNAs in cancer (ko05206);; Hypertrophic cardiomyopathy (HCM) (ko05410);; Dilated cardiomyopathy (ko05414)	[Z]	Cytoskeleton	Tropomyosin;; Tropomyosin like;; Tropomyosin like	Tropomyosin alpha-1 chain OS=Bos taurus OX=9913 GN=TPM1 PE=2 SV=1	PREDICTED: tropomyosin alpha-1 chain isoform X3 [Balaenoptera acutorostrata scammoni]
[truncated: 36,577 more rows]
