# Supplementary material for: Integrative Analysis of Nanopore and Illumina Sequencing Reveals Alternative Splicing Complexity in Pig Longissimus Dorsi Muscle
Source: Front Genet. 2022 Apr 11;13:877646. doi: 10.3389/fgene.2022.877646 (PMC9035893; doi:10.3389/fgene.2022.877646)
Supplement: Supplementary file 3 [file Table9.XLSX]

## Sheet: Supplementary Table S9
Supplementary Table S9 Splicing isoforms of module black
NodeName	ModuleName
ONT.10031.41	black
ONT.10470.2	black
ONT.10521.10	black
ONT.10586.5	black
ONT.10638.13	black
ONT.10638.14	black
ONT.10675.2	black
ONT.10749.5	black
ONT.10763.5	black
ONT.10790.7	black
ONT.10900.3	black
ONT.11110.7	black
ONT.11157.2	black
ONT.11165.1	black
ONT.11307.12	black
ONT.11369.5	black
ONT.11473.109	black
ONT.11505.7	black
ONT.11625.39	black
ONT.11655.42	black
ONT.11678.6	black
ONT.11722.14	black
ONT.12026.2	black
ONT.12124.2	black
ONT.12129.7	black
ONT.12397.12	black
ONT.1244.5	black
ONT.12449.54	black
ONT.12449.58	black
ONT.12517.1	black
ONT.12600.1	black
ONT.12609.4	black
ONT.12656.19	black
ONT.1267.7	black
ONT.12673.1	black
ONT.12688.5	black
ONT.12707.1	black
ONT.12803.1	black
ONT.12803.17	black
ONT.12897.1	black
ONT.1302.6	black
ONT.13121.3	black
ONT.13239.3	black
ONT.13247.4	black
ONT.13373.1	black
ONT.13691.1	black
ONT.13750.8	black
ONT.13758.6	black
ONT.13794.2	black
ONT.13802.11	black
ONT.14086.11	black
ONT.14154.17	black
ONT.14154.29	black
ONT.14169.5	black
ONT.14227.7	black
ONT.14238.21	black
ONT.14259.3	black
ONT.14657.3	black
ONT.14749.3	black
ONT.14749.8	black
ONT.14908.3	black
ONT.15020.4	black
ONT.15045.9	black
ONT.15059.14	black
ONT.15059.4	black
ONT.15079.18	black
ONT.15164.2	black
ONT.15181.4	black
ONT.15267.9	black
ONT.15292.3	black
ONT.15432.1	black
ONT.15612.8	black
ONT.15612.9	black
ONT.15722.1	black
ONT.15779.2	black
ONT.15984.5	black
ONT.16040.1	black
ONT.16074.4	black
ONT.16191.11	black
ONT.16393.1	black
ONT.16591.5	black
ONT.1716.23	black
ONT.1763.16	black
ONT.191.5	black
ONT.204.1	black
ONT.204.2	black
ONT.2236.2	black
ONT.2529.3	black
ONT.2638.29	black
ONT.2662.2	black
ONT.2674.11	black
ONT.2762.5	black
ONT.2775.20	black
ONT.2775.22	black
ONT.2949.1	black
ONT.2949.2	black
ONT.2949.8	black
ONT.3010.2	black
ONT.3228.1	black
ONT.3407.2	black
ONT.3669.13	black
ONT.3776.3	black
ONT.3832.5	black
ONT.3891.5	black
ONT.3985.11	black
ONT.3985.9	black
ONT.4023.6	black
ONT.4099.1	black
ONT.4146.26	black
ONT.4161.5	black
ONT.4190.2	black
ONT.4222.2	black
ONT.4294.3	black
ONT.4320.2	black
ONT.4331.4	black
ONT.4455.6	black
ONT.4689.6	black
ONT.4770.1	black
ONT.4782.3	black
ONT.4786.5	black
ONT.4903.3	black
ONT.5299.2	black
ONT.5365.126	black
ONT.5365.82	black
ONT.5365.83	black
ONT.5374.1	black
ONT.5376.1	black
ONT.5453.3	black
ONT.5457.5	black
ONT.5591.3	black
ONT.5768.2	black
ONT.5883.18	black
ONT.5883.19	black
ONT.5883.5	black
ONT.5998.1	black
ONT.6131.1	black
ONT.6131.7	black
ONT.625.6	black
ONT.6509.4	black
ONT.6516.6	black
ONT.6519.13	black
ONT.6603.3	black
ONT.6617.8	black
ONT.6874.13	black
ONT.7094.6	black
ONT.7161.19	black
ONT.7166.4	black
ONT.7235.165	black
ONT.7429.11	black
ONT.7429.12	black
ONT.7429.23	black
ONT.7448.22	black
ONT.7448.34	black
ONT.7459.3	black
ONT.7478.23	black
ONT.7512.8	black
ONT.7580.9	black
ONT.759.1	black
ONT.759.3	black
ONT.759.5	black
ONT.7801.2	black
ONT.7821.2	black
ONT.7836.3	black
ONT.7978.3	black
ONT.7996.2	black
ONT.8117.9	black
ONT.813.3	black
ONT.8131.2	black
ONT.8161.2	black
ONT.8307.4	black
ONT.8314.2	black
ONT.8386.11	black
ONT.8386.12	black
ONT.8450.11	black
ONT.8450.13	black
ONT.8566.2	black
ONT.8569.2	black
ONT.881.24	black
ONT.8844.2	black
ONT.8888.7	black
ONT.8919.1	black
ONT.9084.67	black
ONT.9214.5	black
ONT.9322.51	black
ONT.9330.6	black
ONT.9403.16	black
ONT.9738.5	black
ONT.9844.1	black
ONT.9943.8	black
ONT.9943.9	black
ONT.9986.3	black
