# Supplementary material for: Integrative Analysis of Nanopore and Illumina Sequencing Reveals Alternative Splicing Complexity in Pig Longissimus Dorsi Muscle
Source: Front Genet. 2022 Apr 11;13:877646. doi: 10.3389/fgene.2022.877646 (PMC9035893; doi:10.3389/fgene.2022.877646)
Supplement: Supplementary file 5 [file Table6.XLSX]

## Sheet: Supplementary Table S6
Supplementary Table S6 Result of DESIs
TranscriptID	Log2FoldChange	Pvalue	Padjust
ONT.11307.2	-26.5032	1.38e-28	1.39e-24
ONT.11625.10	28.6732	1.43e-22	7.18e-19
ONT.1302.8	-23.5771	4.1e-16	1.37e-12
ONT.1397.33	23.352	2.4e-15	6.01e-12
ONT.11146.5	-23.1938	5.09e-15	1.02e-11
ONT.16617.7	22.8192	1.01e-14	1.69e-11
ONT.3899.9	-21.8406	1.73e-13	2.48e-10
ONT.7161.1	-21.7172	2.37e-13	2.97e-10
ONT.10349.9	-8.90153	1.86e-12	2.08e-09
ONT.10675.4	-18.5055	4.11e-12	4.12e-09
ONT.12529.241	-19.8284	2.25e-11	2.05e-08
ONT.9523.3	9.41792	4.39e-11	3.67e-08
ONT.1788.17	-17.6562	2.14e-09	1.65e-06
ONT.12449.3	-14.5324	7.91e-09	5.67e-06
ONT.1062.15	-4.22511	2.59e-08	1.73e-05
ONT.2638.2	4.17523	6.89e-08	4.32e-05
ONT.13291.2	4.81823	8.72e-08	5.15e-05
ONT.12026.17	3.17831	1.59e-07	8.87e-05
ONT.13291.24	4.46763	1.93e-07	0.000101976
ONT.12869.13	4.82504	2.09e-07	0.000103649
ONT.11473.95	-2.12816	2.17e-07	0.000103649
ONT.13291.18	4.42859	2.34e-07	0.000106833
ONT.11047.3	-2.35788	3.75e-07	0.000163716
ONT.5824.117	3.94215	5.28e-07	0.000220842
ONT.8304.6	5.76101	6.44e-07	0.00025848
ONT.10717.38	-3.05643	1.78e-06	0.00068839
ONT.4594.6	-1.60603	2.12e-06	0.000789438
ONT.588.22	-13.7712	2.35e-06	0.000840701
ONT.1397.6	3.52065	2.72e-06	0.000942447
ONT.137.12	-13.5997	3.13e-06	0.00104573
ONT.103.10	7.05004	3.23e-06	0.00104573
ONT.14739.16	-7.60573	3.39e-06	0.00106475
ONT.4224.47	-8.93051	3.78e-06	0.00115103
ONT.11722.21	7.79183	4.56e-06	0.00133106
ONT.13291.21	3.73368	4.64e-06	0.00133106
ONT.11554.2	12.7722	9.58e-06	0.00267101
ONT.191.5	2.97222	1.5e-05	0.00407183
ONT.9616.12	-2.30009	1.65e-05	0.0043665
ONT.1452.6	2.70704	1.96e-05	0.00498169
ONT.9616.3	-2.3265	1.99e-05	0.00498169
ONT.1267.7	-3.35808	2.75e-05	0.00672944
ONT.11171.3	5.14319	3.04e-05	0.0072707
ONT.7106.19	2.88034	3.96e-05	0.00924366
ONT.5506.5	2.89905	4.12e-05	0.0093886
ONT.6799.10	-2.35392	4.47e-05	0.00972767
ONT.11473.103	-2.16963	4.51e-05	0.00972767
ONT.12957.1	-1.75688	4.63e-05	0.00972767
ONT.7235.51	-11.9183	4.65e-05	0.00972767
ONT.1302.6	-9.0434	5.48e-05	0.0112217
ONT.12981.9	1.54528	5.68e-05	0.0114054
ONT.14489.13	-2.10078	6.71e-05	0.013121
ONT.11012.26	-1.1492	6.8e-05	0.013121
ONT.15153.3	-2.07538	7.13e-05	0.013365
ONT.11722.12	3.50068	7.19e-05	0.013365
ONT.16074.8	-1.38064	7.77e-05	0.0141742
ONT.11257.5	2.66051	8.08e-05	0.0144728
ONT.12118.49	-1.25257	0.000106122	0.0186849
ONT.4294.9	-1.89984	0.000111538	0.0193
ONT.10461.9	-1.07445	0.000118216	0.0201088
ONT.10591.14	2.96507	0.000127908	0.021044
ONT.3574.5	2.13321	0.000131055	0.021214
ONT.13577.11	9.45953	0.000139994	0.0223013
ONT.13232.3	-1.32488	0.000142587	0.0223595
ONT.4294.3	-2.18309	0.00014499	0.0223865
ONT.14229.29	11.0472	0.00015268	0.0232166
ONT.15004.6	3.53776	0.000170655	0.0247201
ONT.7120.12	-2.1883	0.000189348	0.0267647
ONT.8386.3	2.62329	0.000197878	0.0268259
ONT.10744.19	2.80794	0.00019907	0.0268259
ONT.14524.8	-1.58882	0.000202265	0.0268259
ONT.7165.7	2.36808	0.00020268	0.0268259
ONT.9500.11	1.74446	0.000203146	0.0268259
ONT.13683.13	2.22159	0.000212543	0.0274774
ONT.9068.9	1.21901	0.000218058	0.0274774
ONT.9229.5	6.49606	0.000219031	0.0274774
ONT.14524.9	-2.09902	0.000226242	0.0280316
ONT.5054.14	2.66021	0.000233788	0.0286133
ONT.5824.56	2.02514	0.000247891	0.0299071
ONT.10017.3	4.95388	0.000250319	0.0299071
ONT.10763.6	-1.07978	0.000263857	0.0307915
ONT.11848.6	-2.48295	0.000289318	0.0329954
ONT.14739.11	-5.38853	0.000318247	0.0358868
ONT.3832.5	1.31583	0.00036114	0.0391015
ONT.16148.4	4.19296	0.000363182	0.0391015
ONT.5824.110	1.67696	0.000366236	0.0391015
ONT.15045.17	5.33888	0.000377978	0.0399303
ONT.4724.5	2.33348	0.000389894	0.0406183
ONT.7580.9	-1.06488	0.000392584	0.0406183
ONT.10888.45	-2.17918	0.000422772	0.0432953
ONT.106.5	-10.2595	0.000436962	0.0440927
ONT.7235.143	-2.48145	0.000440727	0.0440927
ONT.7120.13	-2.03455	0.000446155	0.0440927
ONT.12529.9	5.36349	0.000456131	0.0440927
ONT.687.11	2.23744	0.000456857	0.0440927
ONT.8067.5	-2.95272	0.00045692	0.0440927
ONT.10591.3	3.16264	0.000497066	0.04751
ONT.6403.2	1.3621	0.000505145	0.0478267
ONT.7235.171	-1.25429	0.000514005	0.0482108
