# Supplementary material for: Integrative Analysis of Nanopore and Illumina Sequencing Reveals Alternative Splicing Complexity in Pig Longissimus Dorsi Muscle
Source: Front Genet. 2022 Apr 11;13:877646. doi: 10.3389/fgene.2022.877646 (PMC9035893; doi:10.3389/fgene.2022.877646)
Supplement: Supplementary file 6 [file Table11.XLSX]

## Sheet: Supplementary Table S11
Supplementary Table S11 Top 30 in PPI of module black
Rank	GeneName	Score
1	TPI1	9
2	DDX55	7
3	MRPL27	6
3	PKM	6
3	PYGM	6
3	PSMA3	6
3	EIF4A3	6
3	MRPS6	6
9	EIF5A	5
9	PSMD4	5
9	PFKM	5
12	HNRNPDL	4
12	ETFB	4
12	PFDN6	4
12	NDUFS3	4
12	PSME2	4
12	OXSM	4
12	NGDN	4
19	HNRNPAB	3
19	DGCR8	3
19	NOP56	3
19	MYBPC1	3
19	MYBPC2	3
19	NSFL1C	3
19	PEBP4	3
19	MRPL48	3
19	AAR2	3
19	NAXE	3
19	SCNM1	3
19	BCAT2	3
