# Supplementary material for: Integrative Analysis of Nanopore and Illumina Sequencing Reveals Alternative Splicing Complexity in Pig Longissimus Dorsi Muscle
Source: Front Genet. 2022 Apr 11;13:877646. doi: 10.3389/fgene.2022.877646 (PMC9035893; doi:10.3389/fgene.2022.877646)
Supplement: Supplementary file 7 [file Table4.XLSX]

## Sheet: Supplementary Table S4
Supplementary Table S4 AS events analysis
TranscriptID	GeneName	AS event
ONT.10009.1	ACP1	Alternative 5' Splice Site
ONT.10009.1	ACP1	Mutually exclusive exon
ONT.10009.13	ACP1	Intron retention
ONT.10009.2	ACP1	Exon skipping
ONT.10009.2	ACP1	Alternative 3' splice site
ONT.10009.2	ACP1	Mutually exclusive exon
ONT.10009.3	ACP1	Alternative 5' Splice Site
ONT.10009.3	ACP1	Mutually exclusive exon
ONT.10009.4	ACP1	Alternative 5' Splice Site
ONT.10009.4	ACP1	Mutually exclusive exon
ONT.10009.5	ACP1	Exon skipping
ONT.10009.5	ACP1	Alternative 3' splice site
ONT.10009.5	ACP1	Mutually exclusive exon
ONT.10009.6	ACP1	Exon skipping
ONT.10009.6	ACP1	Alternative 3' splice site
ONT.10009.6	ACP1	Mutually exclusive exon
ONT.10012.18	C8orf33	Intron retention
ONT.10017.3	ZNF7	Alternative 5' Splice Site
ONT.10025.1	GPT	Exon skipping
ONT.10025.1	GPT	Intron retention
ONT.10025.10	MFSD3	Alternative 5' Splice Site
ONT.10025.12	GPT	Alternative 5' Splice Site
ONT.10025.13	GPT	Intron retention
ONT.10025.14	GPT	Mutually exclusive exon
ONT.10025.15	GPT	Alternative 5' Splice Site
ONT.10025.19	GPT	Intron retention
ONT.10025.2	GPT	Exon skipping
ONT.10025.2	GPT	Alternative 3' splice site
ONT.10025.2	GPT	Mutually exclusive exon
ONT.10025.3	GPT	Exon skipping
ONT.10025.3	GPT	Alternative 5' Splice Site
ONT.10025.4	GPT	Exon skipping
ONT.10025.4	GPT	Alternative 3' splice site
ONT.10031.11	VPS28	Intron retention
ONT.10031.16	VPS28	Alternative 5' Splice Site
ONT.10031.19	VPS28	Mutually exclusive exon
ONT.10031.28	VPS28	Alternative 3' splice site
ONT.10031.28	VPS28	Mutually exclusive exon
ONT.10031.3	VPS28	Alternative 3' splice site
ONT.10031.3	VPS28	Mutually exclusive exon
ONT.10031.33	VPS28	Mutually exclusive exon
ONT.10031.38	VPS28	Mutually exclusive exon
ONT.10031.4	VPS28	Mutually exclusive exon
ONT.10031.41	VPS28	Intron retention
ONT.10031.42	VPS28	Alternative 3' splice site
ONT.10031.42	VPS28	Mutually exclusive exon
ONT.10031.44	VPS28	Alternative 3' splice site
ONT.10031.44	VPS28	Mutually exclusive exon
ONT.10031.5	VPS28	Alternative 5' Splice Site
ONT.10039.2	HSF1	Alternative 3' splice site
ONT.10039.3	HSF1	Alternative 3' splice site
ONT.10046.1	MAF1	Alternative 5' Splice Site
ONT.10046.1	MAF1	Alternative 3' splice site
ONT.10046.10	MAF1	Alternative 5' Splice Site
ONT.10046.10	MAF1	Alternative 3' splice site
ONT.10046.11	MAF1	Alternative 3' splice site
ONT.10046.17	MAF1	Intron retention
ONT.10046.17	MAF1	Alternative 3' splice site
ONT.10046.2	MAF1	Alternative 5' Splice Site
ONT.10046.2	MAF1	Intron retention
ONT.10046.2	MAF1	Alternative 3' splice site
ONT.10046.3	MAF1	Alternative 5' Splice Site
ONT.10046.4	MAF1	Alternative 5' Splice Site
ONT.10046.4	MAF1	Alternative 3' splice site
ONT.10046.5	MAF1	Alternative 5' Splice Site
ONT.10046.5	MAF1	Alternative 3' splice site
ONT.10046.6	MAF1	Alternative 5' Splice Site
ONT.10046.7	MAF1	Intron retention
ONT.10046.7	MAF1	Alternative 3' splice site
ONT.10046.8	MAF1	Alternative 5' Splice Site
ONT.10046.8	MAF1	Alternative 3' splice site
ONT.10047.4	SHARPIN	Exon skipping
ONT.10047.5	SHARPIN	Alternative 3' splice site
ONT.10047.7	SHARPIN	Intron retention
ONT.10050.1	EXOSC4	Exon skipping
ONT.10050.1	EXOSC4	Alternative 5' Splice Site
ONT.10058.11	PUF60	Exon skipping
ONT.10058.2	PUF60	Exon skipping
ONT.10058.3	PUF60	Exon skipping
ONT.10058.4	PUF60	Exon skipping
ONT.10058.7	PUF60	Alternative 3' splice site
ONT.10068.3	TSTA3	Exon skipping
ONT.10068.4	TSTA3	Alternative 5' Splice Site
ONT.10068.4	TSTA3	Exon skipping
ONT.10068.5	TSTA3	Exon skipping
ONT.10068.7	TSTA3	Exon skipping
ONT.10068.9	TSTA3	Exon skipping
ONT.10069.10	EEF1D	Alternative 5' Splice Site
ONT.10069.11	EEF1D	Alternative 5' Splice Site
ONT.10069.17	EEF1D	Alternative 5' Splice Site
ONT.10069.17	EEF1D	Alternative 3' splice site
ONT.10069.18	EEF1D	Alternative 5' Splice Site
ONT.10069.20	EEF1D	Alternative 5' Splice Site
ONT.10069.7	EEF1D	Alternative 5' Splice Site
ONT.10080.1	GPIHBP1	Intron retention
ONT.10080.10	GPIHBP1	Alternative 5' Splice Site
ONT.10080.11	GPIHBP1	Intron retention
ONT.10080.13	GPIHBP1	Alternative 3' splice site
ONT.10080.15	GPIHBP1	Alternative 3' splice site
ONT.10080.5	GPIHBP1	Alternative 3' splice site
ONT.10080.8	GPIHBP1	Intron retention
ONT.10084.3	LYNX1	Exon skipping
ONT.10089.7	PTP4A3	Alternative 5' Splice Site
ONT.10099.1	CHRAC1	Exon skipping
ONT.10099.3	CHRAC1	Exon skipping
ONT.10099.5	CHRAC1	Exon skipping
ONT.1012.1	--	Exon skipping
ONT.1012.10	--	Exon skipping
ONT.1012.14	--	Exon skipping
ONT.1012.3	--	Exon skipping
ONT.1012.5	--	Exon skipping
ONT.1012.8	--	Exon skipping
ONT.1012.9	--	Exon skipping
ONT.10128.2	NDUFB9	Exon skipping
ONT.10129.1	TATDN1	Alternative 5' Splice Site
ONT.10129.5	TATDN1	Alternative 5' Splice Site
ONT.10138.3	--	Alternative 3' splice site
ONT.10150.2	C8orf76	Intron retention
ONT.10152.2	DERL1	Alternative 3' splice site
ONT.10182.1	UTP23	Exon skipping
ONT.10182.4	UTP23	Exon skipping
ONT.10182.6	UTP23	Exon skipping
ONT.10183.1	EIF3H	Alternative 3' splice site
ONT.10183.3	EIF3H	Alternative 3' splice site
ONT.10183.8	EIF3H	Alternative 3' splice site
ONT.10188.1	ENY2	Exon skipping
ONT.10188.1	ENY2	Alternative 5' Splice Site
ONT.10188.1	ENY2	Alternative 3' splice site
ONT.10188.11	ENY2	Alternative 3' splice site
ONT.10188.14	ENY2	Exon skipping
ONT.10188.14	ENY2	Alternative 5' Splice Site
ONT.10188.14	ENY2	Alternative 3' splice site
ONT.10188.15	ENY2	Exon skipping
ONT.10188.15	ENY2	Mutually exclusive exon
ONT.10188.2	ENY2	Exon skipping
ONT.10188.2	ENY2	Alternative 5' Splice Site
ONT.10188.2	ENY2	Alternative 3' splice site
ONT.10188.3	ENY2	Exon skipping
ONT.10188.3	ENY2	Alternative 5' Splice Site
ONT.10188.3	ENY2	Alternative 3' splice site
ONT.10188.4	ENY2	Exon skipping
ONT.10188.4	ENY2	Mutually exclusive exon
ONT.10188.5	ENY2	Mutually exclusive exon
ONT.10188.6	ENY2	Intron retention
ONT.10188.6	ENY2	Exon skipping
ONT.10188.6	ENY2	Alternative 5' Splice Site
ONT.10188.6	ENY2	Alternative 3' splice site
ONT.10188.8	ENY2	Intron retention
ONT.10188.8	ENY2	Exon skipping
ONT.10188.8	ENY2	Mutually exclusive exon
ONT.10188.9	ENY2	Alternative 5' Splice Site
ONT.10188.9	ENY2	Exon skipping
ONT.10188.9	ENY2	Alternative 3' splice site
ONT.10190.1	EMC2	Exon skipping
ONT.10190.1	EMC2	Alternative 5' Splice Site
ONT.10190.11	EMC2	Exon skipping
ONT.10190.14	EMC2	Exon skipping
ONT.10190.14	EMC2	Alternative 5' Splice Site
ONT.10190.15	EMC2	Exon skipping
ONT.10190.16	EMC2	Exon skipping
ONT.10190.17	EMC2	Exon skipping
ONT.10190.18	EMC2	Exon skipping
ONT.10190.19	EMC2	Exon skipping
ONT.10190.2	EMC2	Exon skipping
ONT.10190.2	EMC2	Alternative 5' Splice Site
ONT.10190.20	EMC2	Exon skipping
ONT.10190.5	EMC2	Exon skipping
ONT.10190.7	EMC2	Exon skipping
ONT.10190.9	EMC2	Exon skipping
ONT.10190.9	EMC2	Alternative 5' Splice Site
ONT.10191.1	EIF3E	Alternative 5' Splice Site
ONT.10191.2	EIF3E	Alternative 5' Splice Site
ONT.10191.3	EIF3E	Alternative 5' Splice Site
ONT.10191.4	EIF3E	Exon skipping
ONT.10191.7	EIF3E	Alternative 5' Splice Site
ONT.10191.9	EIF3E	Alternative 5' Splice Site
ONT.10194.1	OXR1	Exon skipping
ONT.10194.3	OXR1	Alternative 5' Splice Site
ONT.10194.5	OXR1	Exon skipping
ONT.10194.6	OXR1	Exon skipping
ONT.10194.6	OXR1	Alternative 3' splice site
ONT.10215.1	PABPC1	Alternative 5' Splice Site
ONT.10215.2	PABPC1	Alternative 5' Splice Site
ONT.10217.1	ANKRD46	Alternative 5' Splice Site
ONT.10217.2	ANKRD46	Alternative 5' Splice Site
ONT.10224.1	OSR2	Alternative 3' splice site
ONT.1023.4	DNAJB5	Intron retention
ONT.1023.6	DNAJB5	Intron retention
ONT.10231.8	RPL30	Alternative 3' splice site
ONT.10236.1	MTDH	Exon skipping
ONT.10236.2	MTDH	Exon skipping
ONT.10240.3	--	Exon skipping
ONT.10240.4	--	Exon skipping
ONT.10240.6	--	Exon skipping
ONT.10241.1	UQCRB	Exon skipping
ONT.10241.2	UQCRB	Exon skipping
ONT.10241.3	UQCRB	Exon skipping
ONT.10241.4	UQCRB	Exon skipping
ONT.10245.7	--	Alternative 5' Splice Site
ONT.10245.8	--	Alternative 5' Splice Site
ONT.10265.3	DECR1	Exon skipping
ONT.10270.2	RMDN1	Exon skipping
ONT.10270.2	RMDN1	Alternative 5' Splice Site
ONT.10270.2	RMDN1	Alternative 3' splice site
ONT.10270.4	RMDN1	Exon skipping
ONT.10270.6	RMDN1	Exon skipping
ONT.10276.1	RBIS	Exon skipping
ONT.10276.2	RBIS	Exon skipping
ONT.10276.4	RBIS	Exon skipping
ONT.10276.7	RBIS	Exon skipping
ONT.1028.1	PIGO	Intron retention
ONT.10280.1	IMPA1	Alternative 3' splice site
ONT.10281.2	FABP4	Exon skipping
ONT.10288.1	TPD52	Exon skipping
ONT.10288.3	TPD52	Exon skipping
ONT.10288.5	TPD52	Exon skipping
ONT.10288.6	TPD52	Exon skipping
ONT.1029.1	STOML2	Alternative 5' Splice Site
ONT.1029.10	STOML2	Alternative 5' Splice Site
ONT.1029.11	STOML2	Intron retention
ONT.1029.11	STOML2	Alternative 5' Splice Site
ONT.1029.3	STOML2	Intron retention
ONT.1029.6	STOML2	Alternative 5' Splice Site
ONT.1029.7	STOML2	Alternative 5' Splice Site
ONT.10290.1	MRPS28	Exon skipping
ONT.10290.1	MRPS28	Mutually exclusive exon
ONT.10290.2	MRPS28	Exon skipping
ONT.10290.4	MRPS28	Exon skipping
ONT.10290.5	MRPS28	Exon skipping
ONT.10290.5	MRPS28	Mutually exclusive exon
ONT.10290.6	MRPS28	Exon skipping
ONT.10290.6	MRPS28	Mutually exclusive exon
ONT.10290.7	MRPS28	Exon skipping
ONT.10290.7	MRPS28	Mutually exclusive exon
ONT.103.1	PCMT1	Exon skipping
ONT.103.10	PCMT1	Exon skipping
ONT.103.11	PCMT1	Exon skipping
ONT.103.12	PCMT1	Exon skipping
ONT.103.12	PCMT1	Alternative 5' Splice Site
ONT.103.15	PCMT1	Alternative 5' Splice Site
ONT.103.21	PCMT1	Alternative 5' Splice Site
ONT.103.3	PCMT1	Exon skipping
ONT.103.3	PCMT1	Alternative 5' Splice Site
ONT.103.4	PCMT1	Alternative 5' Splice Site
ONT.103.8	PCMT1	Exon skipping
ONT.103.8	PCMT1	Alternative 5' Splice Site
ONT.10304.2	TMEM70	Alternative 5' Splice Site
ONT.10304.3	TMEM70	Alternative 5' Splice Site
ONT.10304.4	TMEM70	Alternative 5' Splice Site
ONT.10304.6	TMEM70	Exon skipping
ONT.10304.6	TMEM70	Alternative 5' Splice Site
ONT.10306.2	UBE2W	Alternative 5' Splice Site
ONT.10307.2	STAU2	Exon skipping
ONT.10307.4	STAU2	Exon skipping
ONT.10309.7	RPL7	Alternative 3' splice site
ONT.10310.1	TERF1	Exon skipping
ONT.10310.11	TERF1	Alternative 3' splice site
ONT.10310.13	TERF1	Exon skipping
ONT.10310.8	TERF1	Exon skipping
ONT.10310.9	TERF1	Exon skipping
ONT.10315.1	LACTB2	Exon skipping
ONT.10315.2	LACTB2	Exon skipping
ONT.10315.3	LACTB2	Exon skipping
ONT.10315.4	LACTB2	Exon skipping
ONT.10315.5	LACTB2	Exon skipping
ONT.10315.6	LACTB2	Exon skipping
ONT.10315.8	LACTB2	Exon skipping
ONT.10321.1	CSPP1	Exon skipping
ONT.10322.1	COPS5	Alternative 5' Splice Site
ONT.10322.11	COPS5	Alternative 5' Splice Site
ONT.10322.2	COPS5	Alternative 5' Splice Site
ONT.10322.5	COPS5	Exon skipping
ONT.10322.5	COPS5	Alternative 5' Splice Site
ONT.10322.5	COPS5	Mutually exclusive exon
ONT.10322.6	COPS5	Exon skipping
ONT.10322.6	COPS5	Alternative 5' Splice Site
ONT.10322.6	COPS5	Mutually exclusive exon
ONT.10322.7	COPS5	Alternative 5' Splice Site
ONT.10322.8	COPS5	Alternative 5' Splice Site
ONT.10322.9	COPS5	Alternative 5' Splice Site
ONT.10323.1	--	Exon skipping
ONT.10323.2	--	Exon skipping
ONT.10323.3	--	Exon skipping
ONT.10323.3	--	Alternative 3' splice site
ONT.10323.4	--	Alternative 3' splice site
ONT.10323.9	--	Exon skipping
ONT.10323.9	--	Intron retention
ONT.10323.9	--	Alternative 3' splice site
ONT.10338.10	ASPH	Alternative 5' Splice Site
ONT.10338.26	ASPH	Alternative 5' Splice Site
ONT.10338.4	ASPH	Alternative 5' Splice Site
ONT.10338.9	ASPH	Exon skipping
ONT.10345.2	--	Alternative 5' Splice Site
ONT.10345.5	--	Alternative 5' Splice Site
ONT.10349.9	RAB2A	Exon skipping
ONT.10351.1	SDCBP	Alternative 3' splice site
ONT.10351.7	SDCBP	Exon skipping
ONT.10360.1	CHCHD7	Alternative 5' Splice Site
ONT.10360.1	CHCHD7	Alternative 3' splice site
ONT.10360.1	CHCHD7	Mutually exclusive exon
ONT.10360.2	CHCHD7	Alternative 5' Splice Site
ONT.10360.2	CHCHD7	Mutually exclusive exon
ONT.10360.3	CHCHD7	Alternative 3' splice site
ONT.10360.3	CHCHD7	Mutually exclusive exon
ONT.10360.4	CHCHD7	Mutually exclusive exon
ONT.10361.1	RPS20	Alternative 5' Splice Site
ONT.10361.1	RPS20	Mutually exclusive exon
ONT.10361.4	RPS20	Mutually exclusive exon
ONT.10361.7	RPS20	Mutually exclusive exon
ONT.10364.1	TMEM68	Alternative 3' splice site
ONT.10364.3	TMEM68	Exon skipping
ONT.10367.6	MRPL15	Exon skipping
ONT.1037.16	CCDC107	Intron retention
ONT.1037.18	CCDC107	Alternative 3' splice site
ONT.1037.3	CCDC107	Alternative 5' Splice Site
ONT.1037.3	CCDC107	Intron retention
ONT.1037.3	CCDC107	Alternative 3' splice site
ONT.1037.4	CCDC107	Alternative 5' Splice Site
ONT.1037.4	CCDC107	Exon skipping
ONT.1037.4	CCDC107	Alternative 3' splice site
ONT.1037.6	CCDC107	Alternative 5' Splice Site
ONT.1037.9	CCDC107	Intron retention
ONT.10370.5	TCEA1	Intron retention
ONT.10371.2	ATP6V1H	Exon skipping
ONT.10372.1	RB1CC1	Exon skipping
ONT.10373.2	RB1CC1	Alternative 5' Splice Site
ONT.10373.4	RB1CC1	Alternative 5' Splice Site
ONT.10373.6	RB1CC1	Alternative 5' Splice Site
ONT.10380.13	UBE2V2	Exon skipping
ONT.10380.13	UBE2V2	Mutually exclusive exon
ONT.10380.5	UBE2V2	Exon skipping
ONT.10380.5	UBE2V2	Mutually exclusive exon
ONT.10380.6	UBE2V2	Exon skipping
ONT.10380.7	UBE2V2	Exon skipping
ONT.10380.7	UBE2V2	Mutually exclusive exon
ONT.10389.3	METTL11B	Alternative 5' Splice Site
ONT.10389.3	METTL11B	Exon skipping
ONT.10389.4	METTL11B	Exon skipping
ONT.10389.6	METTL11B	Exon skipping
ONT.10389.8	METTL11B	Exon skipping
ONT.1039.3	CA9	Exon skipping
ONT.1039.4	CA9	Exon skipping
ONT.10400.1	--	Exon skipping
ONT.10404.1	XCL1	Exon skipping
ONT.10404.4	XCL1	Exon skipping
ONT.10407.5	TIPRL	Exon skipping
ONT.10409.14	DCAF6	Alternative 5' Splice Site
ONT.10409.17	DCAF6	Exon skipping
ONT.10409.19	DCAF6	Exon skipping
ONT.10409.19	DCAF6	Alternative 5' Splice Site
ONT.10409.21	DCAF6	Exon skipping
ONT.10409.22	DCAF6	Exon skipping
ONT.10409.23	DCAF6	Exon skipping
ONT.10409.3	DCAF6	Alternative 5' Splice Site
ONT.10409.4	DCAF6	Alternative 5' Splice Site
ONT.10409.6	DCAF6	Exon skipping
ONT.10409.6	DCAF6	Alternative 5' Splice Site
ONT.10409.9	DCAF6	Exon skipping
ONT.10409.9	DCAF6	Alternative 5' Splice Site
ONT.1041.1	TPM2	Alternative 5' Splice Site
ONT.1041.1	TPM2	Intron retention
ONT.1041.1	TPM2	Mutually exclusive exon
ONT.1041.11	TPM2	Alternative 5' Splice Site
ONT.1041.11	TPM2	Intron retention
ONT.1041.2	TPM2	Alternative 5' Splice Site
ONT.1041.2	TPM2	Intron retention
ONT.1041.2	TPM2	Mutually exclusive exon
ONT.1041.20	TPM2	Alternative 5' Splice Site
ONT.1041.20	TPM2	Intron retention
ONT.1041.20	TPM2	Mutually exclusive exon
ONT.1041.21	TPM2	Alternative 5' Splice Site
ONT.1041.21	TPM2	Intron retention
ONT.1041.21	TPM2	Mutually exclusive exon
ONT.1041.22	TPM2	Alternative 5' Splice Site
ONT.1041.22	TPM2	Intron retention
ONT.1041.22	TPM2	Mutually exclusive exon
ONT.1041.24	TPM2	Alternative 5' Splice Site
ONT.1041.24	TPM2	Intron retention
ONT.1041.24	TPM2	Mutually exclusive exon
ONT.1041.30	TPM2	Alternative 5' Splice Site
ONT.1041.30	TPM2	Mutually exclusive exon
ONT.1041.32	TPM2	Alternative 5' Splice Site
ONT.1041.32	TPM2	Mutually exclusive exon
ONT.1041.33	TPM2	Intron retention
ONT.1041.35	TPM2	Alternative 5' Splice Site
ONT.1041.35	TPM2	Intron retention
ONT.1041.37	TPM2	Alternative 5' Splice Site
ONT.1041.37	TPM2	Intron retention
ONT.1041.37	TPM2	Mutually exclusive exon
ONT.1041.38	TPM2	Alternative 5' Splice Site
ONT.1041.38	TPM2	Intron retention
ONT.1041.38	TPM2	Mutually exclusive exon
ONT.1041.39	TPM2	Alternative 5' Splice Site
ONT.1041.39	TPM2	Intron retention
ONT.1041.39	TPM2	Mutually exclusive exon
ONT.1041.41	TPM2	Alternative 5' Splice Site
ONT.1041.41	TPM2	Intron retention
ONT.1041.41	TPM2	Mutually exclusive exon
ONT.1041.46	TPM2	Alternative 5' Splice Site
ONT.1041.46	TPM2	Intron retention
ONT.1041.46	TPM2	Mutually exclusive exon
ONT.1041.47	TPM2	Alternative 5' Splice Site
ONT.1041.47	TPM2	Mutually exclusive exon
ONT.1041.48	TPM2	Alternative 5' Splice Site
ONT.1041.48	TPM2	Intron retention
ONT.1041.48	TPM2	Mutually exclusive exon
ONT.1041.51	TPM2	Alternative 5' Splice Site
ONT.1041.51	TPM2	Intron retention
ONT.1041.52	TPM2	Alternative 5' Splice Site
ONT.1041.52	TPM2	Intron retention
ONT.1041.54	TPM2	Alternative 5' Splice Site
ONT.1041.54	TPM2	Intron retention
ONT.1041.56	TPM2	Alternative 5' Splice Site
ONT.1041.56	TPM2	Intron retention
ONT.1041.58	TPM2	Alternative 5' Splice Site
ONT.1041.58	TPM2	Intron retention
ONT.1041.59	TPM2	Alternative 5' Splice Site
ONT.1041.59	TPM2	Intron retention
ONT.1041.6	TPM2	Alternative 5' Splice Site
ONT.1041.6	TPM2	Intron retention
ONT.1041.6	TPM2	Exon skipping
ONT.1041.6	TPM2	Mutually exclusive exon
ONT.1041.60	TPM2	Alternative 5' Splice Site
ONT.1041.60	TPM2	Intron retention
ONT.1041.62	TPM2	Alternative 5' Splice Site
ONT.1041.64	TPM2	Alternative 5' Splice Site
ONT.1041.7	TPM2	Alternative 5' Splice Site
ONT.1041.7	TPM2	Intron retention
ONT.1041.7	TPM2	Mutually exclusive exon
ONT.1041.9	TPM2	Alternative 5' Splice Site
ONT.1041.9	TPM2	Intron retention
ONT.1041.9	TPM2	Mutually exclusive exon
ONT.10410.10	MPC2	Alternative 5' Splice Site
ONT.10410.10	MPC2	Alternative 3' splice site
ONT.10410.13	MPC2	Alternative 3' splice site
ONT.10410.15	MPC2	Exon skipping
ONT.10410.15	MPC2	Alternative 3' splice site
ONT.10410.5	MPC2	Exon skipping
ONT.10410.5	MPC2	Alternative 3' splice site
ONT.10410.7	MPC2	Alternative 3' splice site
ONT.10428.1	MGST3	Exon skipping
ONT.10434.1	--	Exon skipping
ONT.10434.3	--	Exon skipping
ONT.10434.3	--	Alternative 3' splice site
ONT.10434.4	--	Exon skipping
ONT.10436.1	--	Exon skipping
ONT.10442.2	UAP1	Exon skipping
ONT.10442.7	UAP1	Alternative 3' splice site
ONT.10442.9	UAP1	Exon skipping
ONT.10448.1	DUSP12	Alternative 3' splice site
ONT.10448.2	DUSP12	Alternative 3' splice site
ONT.10448.3	DUSP12	Alternative 3' splice site
ONT.10448.4	DUSP12	Alternative 3' splice site
ONT.1045.2	CREB3	Exon skipping
ONT.1045.6	CREB3	Exon skipping
ONT.1045.7	CREB3	Exon skipping
ONT.10450.3	FCGR3	Exon skipping
ONT.10450.3	FCGR3	Alternative 3' splice site
ONT.10455.1	SDHC	Exon skipping
ONT.10455.10	SDHC	Exon skipping
ONT.10455.11	SDHC	Exon skipping
ONT.10455.9	SDHC	Exon skipping
ONT.10461.9	NDUFS2	Intron retention
ONT.10463.1	B4GALT3	Alternative 3' splice site
ONT.10463.3	B4GALT3	Intron retention
ONT.10464.3	PPOX	Intron retention
ONT.10466.6	UFC1	Intron retention
ONT.10466.8	UFC1	Exon skipping
ONT.10467.1	DEDD	Exon skipping
ONT.10467.2	DEDD	Alternative 3' splice site
ONT.10467.5	DEDD	Exon skipping
ONT.10467.6	DEDD	Exon skipping
ONT.10470.1	NIT1	Intron retention
ONT.10470.10	NIT1	Exon skipping
ONT.10470.11	NIT1	Exon skipping
ONT.10470.11	NIT1	Alternative 5' Splice Site
ONT.10470.18	NIT1	Exon skipping
ONT.10470.18	NIT1	Alternative 3' splice site
ONT.10470.2	NIT1	Exon skipping
ONT.10470.2	NIT1	Alternative 5' Splice Site
ONT.10470.5	NIT1	Alternative 5' Splice Site
ONT.10470.6	NIT1	Exon skipping
ONT.10470.6	NIT1	Alternative 3' splice site
ONT.10470.8	NIT1	Intron retention
ONT.10472.3	USF1	Alternative 5' Splice Site
ONT.10472.8	USF1	Intron retention
ONT.10472.8	USF1	Alternative 5' Splice Site
ONT.10475.1	F11R	Alternative 5' Splice Site
ONT.10481.1	PEX19	Exon skipping
ONT.10481.1	PEX19	Alternative 5' Splice Site
ONT.10481.1	PEX19	Alternative 3' splice site
ONT.10481.10	PEX19	Alternative 5' Splice Site
ONT.10481.12	PEX19	Alternative 5' Splice Site
ONT.10481.13	PEX19	Exon skipping
ONT.10481.13	PEX19	Alternative 5' Splice Site
ONT.10481.13	PEX19	Alternative 3' splice site
ONT.10481.15	PEX19	Exon skipping
ONT.10481.15	PEX19	Alternative 5' Splice Site
ONT.10481.15	PEX19	Alternative 3' splice site
ONT.10481.16	PEX19	Exon skipping
ONT.10481.16	PEX19	Alternative 5' Splice Site
ONT.10481.16	PEX19	Alternative 3' splice site
ONT.10481.17	PEX19	Exon skipping
ONT.10481.17	PEX19	Alternative 5' Splice Site
ONT.10481.17	PEX19	Alternative 3' splice site
ONT.10481.19	PEX19	Exon skipping
ONT.10481.19	PEX19	Alternative 5' Splice Site
ONT.10481.19	PEX19	Alternative 3' splice site
ONT.10481.2	PEX19	Exon skipping
ONT.10481.2	PEX19	Alternative 5' Splice Site
ONT.10481.2	PEX19	Alternative 3' splice site
ONT.10481.20	PEX19	Exon skipping
ONT.10481.20	PEX19	Alternative 5' Splice Site
ONT.10481.20	PEX19	Alternative 3' splice site
ONT.10481.3	PEX19	Exon skipping
ONT.10481.3	PEX19	Alternative 5' Splice Site
ONT.10481.3	PEX19	Alternative 3' splice site
ONT.10481.4	PEX19	Exon skipping
ONT.10481.4	PEX19	Alternative 5' Splice Site
ONT.10481.4	PEX19	Alternative 3' splice site
ONT.10481.5	PEX19	Intron retention
ONT.10481.5	PEX19	Alternative 5' Splice Site
ONT.10481.6	PEX19	Exon skipping
ONT.10481.6	PEX19	Alternative 5' Splice Site
ONT.10481.6	PEX19	Alternative 3' splice site
ONT.10481.7	PEX19	Exon skipping
ONT.10481.7	PEX19	Alternative 5' Splice Site
ONT.10481.7	PEX19	Alternative 3' splice site
ONT.10481.8	PEX19	Exon skipping
ONT.10481.8	PEX19	Alternative 5' Splice Site
ONT.10481.8	PEX19	Alternative 3' splice site
ONT.10481.9	PEX19	Exon skipping
ONT.10481.9	PEX19	Alternative 5' Splice Site
ONT.10481.9	PEX19	Intron retention
ONT.10481.9	PEX19	Alternative 3' splice site
ONT.10485.11	DCAF8	Exon skipping
ONT.10485.14	DCAF8	Exon skipping
ONT.10485.15	DCAF8	Exon skipping
ONT.10485.2	DCAF8	Exon skipping
ONT.10485.3	DCAF8	Exon skipping
ONT.10485.3	DCAF8	Alternative 5' Splice Site
ONT.10485.5	DCAF8	Exon skipping
ONT.10485.6	DCAF8	Alternative 5' Splice Site
ONT.10485.6	DCAF8	Exon skipping
ONT.10485.7	DCAF8	Exon skipping
ONT.10487.3	CASQ1	Alternative 3' splice site
ONT.10488.14	CASQ1	Alternative 3' splice site
ONT.10507.1	ARHGEF11	Exon skipping
ONT.10507.2	ARHGEF11	Exon skipping
ONT.10507.3	ARHGEF11	Exon skipping
ONT.10514.1	MRPL24	Exon skipping
ONT.10514.1	MRPL24	Alternative 5' Splice Site
ONT.10514.10	MRPL24	Exon skipping
ONT.10514.22	MRPL24	Exon skipping
ONT.10514.22	MRPL24	Intron retention
ONT.10514.24	MRPL24	Alternative 5' Splice Site
ONT.10514.26	MRPL24	Alternative 5' Splice Site
ONT.10514.27	MRPL24	Intron retention
ONT.10514.28	MRPL24	Alternative 5' Splice Site
ONT.10514.29	MRPL24	Alternative 5' Splice Site
ONT.10514.3	MRPL24	Alternative 5' Splice Site
ONT.10514.32	MRPL24	Alternative 5' Splice Site
ONT.10514.33	MRPL24	Intron retention
ONT.10514.34	MRPL24	Intron retention
ONT.10514.34	MRPL24	Alternative 5' Splice Site
ONT.10514.35	MRPL24	Intron retention
ONT.10514.4	MRPL24	Exon skipping
ONT.10514.4	MRPL24	Intron retention
ONT.10514.6	MRPL24	Exon skipping
ONT.10514.6	MRPL24	Alternative 5' Splice Site
ONT.10514.7	MRPL24	Exon skipping
ONT.10514.7	MRPL24	Alternative 5' Splice Site
ONT.10514.8	MRPL24	Exon skipping
ONT.10514.8	MRPL24	Alternative 5' Splice Site
ONT.10514.9	MRPL24	Exon skipping
ONT.10514.9	MRPL24	Alternative 5' Splice Site
ONT.1052.5	SPAG8	Alternative 3' splice site
ONT.1052.6	SPAG8	Alternative 3' splice site
ONT.10521.10	NAXE	Alternative 3' splice site
ONT.10524.12	CCT3	Exon skipping
ONT.10524.17	CCT3	Alternative 3' splice site
ONT.10524.2	CCT3	Exon skipping
ONT.10524.6	CCT3	Exon skipping
ONT.10525.1	GLMP	Mutually exclusive exon
ONT.10525.2	GLMP	Mutually exclusive exon
ONT.10530.2	PMF1	Alternative 3' splice site
ONT.10530.3	PMF1	Exon skipping
ONT.10530.3	PMF1	Alternative 3' splice site
ONT.10530.8	PMF1	Exon skipping
ONT.10533.9	LMNA	Alternative 3' splice site
ONT.10534.5	LAMTOR2	Exon skipping
ONT.10536.6	SSR2	Alternative 3' splice site
ONT.10536.7	SSR2	Intron retention
ONT.10542.5	MSTO1	Intron retention
ONT.10544.8	DAP3	Alternative 5' Splice Site
ONT.10544.8	DAP3	Alternative 3' splice site
ONT.10547.2	RUSC1	Alternative 3' splice site
ONT.10547.5	RUSC1	Exon skipping
ONT.10551.1	SCAMP3	Alternative 5' Splice Site
ONT.10551.2	SCAMP3	Alternative 5' Splice Site
ONT.10551.2	SCAMP3	Alternative 3' splice site
ONT.10557.8	KRTCAP2	Alternative 5' Splice Site
ONT.10561.2	EFNA1	Alternative 5' Splice Site
ONT.10561.2	EFNA1	Exon skipping
ONT.10561.6	EFNA1	Alternative 5' Splice Site
ONT.10561.6	EFNA1	Intron retention
ONT.10567.1	CKS1B	Exon skipping
ONT.10567.5	CKS1B	Alternative 3' splice site
ONT.10567.6	CKS1B	Exon skipping
ONT.10586.1	HAX1	Alternative 3' splice site
ONT.10586.5	HAX1	Intron retention
ONT.10586.5	HAX1	Alternative 3' splice site
ONT.10586.7	HAX1	Alternative 3' splice site
ONT.10586.8	HAX1	Intron retention
ONT.10590.1	C1orf43	Exon skipping
ONT.10590.2	C1orf43	Exon skipping
ONT.10590.4	C1orf43	Exon skipping
ONT.10590.5	C1orf43	Exon skipping
ONT.10591.1	TPM3	Alternative 5' Splice Site
ONT.10591.1	TPM3	Mutually exclusive exon
ONT.10591.13	TPM3	Alternative 5' Splice Site
ONT.10591.13	TPM3	Mutually exclusive exon
ONT.10591.14	TPM3	Alternative 5' Splice Site
ONT.10591.17	TPM3	Alternative 5' Splice Site
ONT.10591.17	TPM3	Mutually exclusive exon
ONT.10591.19	TPM3	Alternative 5' Splice Site
ONT.10591.19	TPM3	Mutually exclusive exon
ONT.10591.2	TPM3	Alternative 5' Splice Site
ONT.10591.20	TPM3	Alternative 5' Splice Site
ONT.10591.20	TPM3	Mutually exclusive exon
ONT.10591.21	TPM3	Alternative 5' Splice Site
ONT.10591.21	TPM3	Mutually exclusive exon
ONT.10591.25	TPM3	Alternative 5' Splice Site
ONT.10591.25	TPM3	Mutually exclusive exon
ONT.10591.26	TPM3	Alternative 5' Splice Site
ONT.10591.29	TPM3	Mutually exclusive exon
ONT.10591.3	TPM3	Alternative 5' Splice Site
ONT.10591.31	TPM3	Mutually exclusive exon
ONT.10591.32	TPM3	Mutually exclusive exon
ONT.10591.5	TPM3	Mutually exclusive exon
ONT.10591.7	TPM3	Alternative 5' Splice Site
ONT.10591.7	TPM3	Mutually exclusive exon
ONT.10591.8	TPM3	Alternative 5' Splice Site
ONT.10591.8	TPM3	Mutually exclusive exon
ONT.10591.9	TPM3	Alternative 5' Splice Site
ONT.10591.9	TPM3	Alternative 3' splice site
ONT.10591.9	TPM3	Mutually exclusive exon
ONT.10594.10	JTB	Intron retention
ONT.10594.14	JTB	Exon skipping
ONT.10594.18	JTB	Alternative 3' splice site
ONT.10594.18	JTB	Mutually exclusive exon
ONT.10594.26	JTB	Exon skipping
ONT.10594.3	JTB	Intron retention
ONT.10594.3	JTB	Alternative 3' splice site
ONT.10594.3	JTB	Mutually exclusive exon
ONT.10594.4	JTB	Intron retention
ONT.10594.4	JTB	Exon skipping
ONT.10594.4	JTB	Alternative 5' Splice Site
ONT.10594.4	JTB	Mutually exclusive exon
ONT.10594.5	JTB	Intron retention
ONT.10594.5	JTB	Alternative 3' splice site
ONT.10594.5	JTB	Mutually exclusive exon
ONT.10594.9	JTB	Intron retention
ONT.10595.2	CREB3L4	Exon skipping
ONT.10595.3	CREB3L4	Exon skipping
ONT.106.1	KATNA1	Exon skipping
ONT.106.3	KATNA1	Exon skipping
ONT.106.5	KATNA1	Exon skipping
ONT.10606.7	ILF2	Alternative 5' Splice Site
ONT.10608.4	SNAPIN	Intron retention
ONT.10608.5	SNAPIN	Exon skipping
ONT.10611.1	CHTOP	Intron retention
ONT.10611.1	CHTOP	Alternative 5' Splice Site
ONT.10611.1	CHTOP	Alternative 3' splice site
ONT.10611.1	CHTOP	Mutually exclusive exon
ONT.10611.14	CHTOP	Intron retention
ONT.10611.14	CHTOP	Exon skipping
ONT.10611.14	CHTOP	Mutually exclusive exon
ONT.10611.15	CHTOP	Exon skipping
ONT.10611.15	CHTOP	Alternative 5' Splice Site
ONT.10611.15	CHTOP	Alternative 3' splice site
ONT.10611.15	CHTOP	Mutually exclusive exon
ONT.10611.17	CHTOP	Exon skipping
ONT.10611.17	CHTOP	Mutually exclusive exon
ONT.10611.24	CHTOP	Intron retention
ONT.10611.24	CHTOP	Exon skipping
ONT.10611.24	CHTOP	Alternative 5' Splice Site
ONT.10611.28	CHTOP	Exon skipping
ONT.10611.28	CHTOP	Mutually exclusive exon
ONT.10611.3	CHTOP	Exon skipping
ONT.10611.3	CHTOP	Mutually exclusive exon
ONT.10611.4	CHTOP	Exon skipping
ONT.10611.4	CHTOP	Alternative 5' Splice Site
ONT.10611.8	CHTOP	Intron retention
ONT.10611.8	CHTOP	Exon skipping
ONT.10611.8	CHTOP	Alternative 5' Splice Site
ONT.10611.8	CHTOP	Mutually exclusive exon
ONT.10611.9	CHTOP	Exon skipping
ONT.10611.9	CHTOP	Alternative 3' splice site
ONT.10611.9	CHTOP	Mutually exclusive exon
ONT.10612.2	S100A13	Alternative 3' splice site
ONT.10612.4	S100A13	Alternative 3' splice site
ONT.10616.3	S100A1	Exon skipping
ONT.10618.2	S100A4	Alternative 5' Splice Site
ONT.1062.1	CLTA	Exon skipping
ONT.1062.10	CLTA	Exon skipping
ONT.1062.12	CLTA	Exon skipping
ONT.1062.14	CLTA	Exon skipping
ONT.1062.15	CLTA	Exon skipping
ONT.1062.18	CLTA	Exon skipping
ONT.1062.18	CLTA	Alternative 5' Splice Site
ONT.1062.2	CLTA	Exon skipping
ONT.1062.20	CLTA	Exon skipping
ONT.1062.26	CLTA	Exon skipping
ONT.1062.29	CLTA	Exon skipping
ONT.1062.3	CLTA	Exon skipping
ONT.1062.30	CLTA	Exon skipping
ONT.1062.30	CLTA	Alternative 5' Splice Site
ONT.1062.30	CLTA	Alternative 3' splice site
ONT.1062.4	CLTA	Exon skipping
ONT.1062.4	CLTA	Alternative 5' Splice Site
ONT.1062.6	CLTA	Exon skipping
ONT.1062.7	CLTA	Exon skipping
ONT.1062.7	CLTA	Alternative 5' Splice Site
ONT.1062.8	CLTA	Exon skipping
ONT.1062.9	CLTA	Exon skipping
ONT.10625.1	S100A10	Exon skipping
ONT.10625.2	S100A10	Exon skipping
ONT.10626.3	RORC	Alternative 5' Splice Site
ONT.10629.1	MRPL9	Exon skipping
ONT.10629.4	MRPL9	Intron retention
ONT.10634.3	PSMB4	Intron retention
ONT.10638.1	PSMD4	Alternative 5' Splice Site
ONT.10638.13	PSMD4	Alternative 3' splice site
ONT.10638.14	PSMD4	Alternative 5' Splice Site
ONT.10638.14	PSMD4	Alternative 3' splice site
ONT.10638.19	PSMD4	Alternative 5' Splice Site
ONT.10638.19	PSMD4	Alternative 3' splice site
ONT.10638.2	PSMD4	Alternative 5' Splice Site
ONT.10638.2	PSMD4	Intron retention
ONT.10638.21	PSMD4	Alternative 5' Splice Site
ONT.10638.23	PSMD4	Alternative 5' Splice Site
ONT.10638.24	PSMD4	Alternative 5' Splice Site
ONT.10638.8	PSMD4	Alternative 5' Splice Site
ONT.10638.8	PSMD4	Alternative 3' splice site
ONT.10640.2	VPS72	Intron retention
ONT.10640.3	VPS72	Intron retention
ONT.10640.4	VPS72	Alternative 5' Splice Site
ONT.10640.6	VPS72	Intron retention
ONT.10640.6	VPS72	Alternative 5' Splice Site
ONT.10640.8	VPS72	Alternative 5' Splice Site
ONT.10640.9	VPS72	Intron retention
ONT.10640.9	VPS72	Alternative 5' Splice Site
ONT.10642.1	TMOD4	Alternative 3' splice site
ONT.10642.10	TMOD4	Alternative 3' splice site
ONT.10642.11	TMOD4	Alternative 3' splice site
ONT.10642.12	TMOD4	Alternative 3' splice site
ONT.10642.13	TMOD4	Alternative 3' splice site
ONT.10642.14	TMOD4	Alternative 3' splice site
ONT.10642.17	TMOD4	Intron retention
ONT.10642.17	TMOD4	Alternative 3' splice site
ONT.10642.19	TMOD4	Intron retention
ONT.10642.2	TMOD4	Alternative 3' splice site
ONT.10642.20	TMOD4	Intron retention
ONT.10642.21	TMOD4	Mutually exclusive exon
ONT.10642.23	TMOD4	Alternative 5' Splice Site
ONT.10642.23	TMOD4	Mutually exclusive exon
ONT.10642.24	TMOD4	Alternative 5' Splice Site
ONT.10642.24	TMOD4	Alternative 3' splice site
ONT.10642.25	TMOD4	Alternative 5' Splice Site
ONT.10642.25	TMOD4	Alternative 3' splice site
ONT.10642.25	TMOD4	Mutually exclusive exon
ONT.10642.26	TMOD4	Alternative 3' splice site
ONT.10642.26	TMOD4	Mutually exclusive exon
ONT.10642.27	TMOD4	Alternative 3' splice site
ONT.10642.28	TMOD4	Alternative 3' splice site
ONT.10642.29	TMOD4	Alternative 3' splice site
ONT.10642.3	TMOD4	Exon skipping
ONT.10642.3	TMOD4	Alternative 5' Splice Site
ONT.10642.3	TMOD4	Alternative 3' splice site
ONT.10642.31	TMOD4	Alternative 3' splice site
ONT.10642.33	TMOD4	Alternative 3' splice site
ONT.10642.35	TMOD4	Alternative 3' splice site
ONT.10642.38	TMOD4	Intron retention
ONT.10642.4	TMOD4	Exon skipping
ONT.10642.4	TMOD4	Alternative 3' splice site
ONT.10642.40	TMOD4	Alternative 3' splice site
ONT.10642.41	TMOD4	Alternative 3' splice site
ONT.10642.42	TMOD4	Intron retention
ONT.10642.43	TMOD4	Mutually exclusive exon
ONT.10642.44	TMOD4	Intron retention
ONT.10642.44	TMOD4	Alternative 3' splice site
ONT.10642.45	TMOD4	Alternative 3' splice site
ONT.10642.46	TMOD4	Alternative 5' Splice Site
ONT.10642.46	TMOD4	Mutually exclusive exon
ONT.10642.48	TMOD4	Intron retention
ONT.10642.5	TMOD4	Alternative 3' splice site
ONT.10642.52	TMOD4	Alternative 5' Splice Site
ONT.10642.52	TMOD4	Mutually exclusive exon
ONT.10642.53	TMOD4	Alternative 3' splice site
ONT.10642.54	TMOD4	Intron retention
ONT.10642.6	TMOD4	Alternative 5' Splice Site
ONT.10642.6	TMOD4	Alternative 3' splice site
ONT.10642.7	TMOD4	Alternative 3' splice site
ONT.10642.9	TMOD4	Mutually exclusive exon
ONT.10643.1	SCNM1	Intron retention
ONT.10643.1	SCNM1	Alternative 3' splice site
ONT.10643.13	SCNM1	Alternative 3' splice site
ONT.10643.2	SCNM1	Alternative 3' splice site
ONT.10643.9	SCNM1	Intron retention
ONT.10649.2	CDC42SE1	Alternative 3' splice site
ONT.1066.3	GRHPR	Exon skipping
ONT.1066.5	GRHPR	Exon skipping
ONT.1066.6	GRHPR	Exon skipping
ONT.10667.1	PRPF3	Alternative 3' splice site
ONT.10670.1	MRPS21	Alternative 5' Splice Site
ONT.10670.13	MRPS21	Alternative 5' Splice Site
ONT.10670.16	MRPS21	Alternative 5' Splice Site
ONT.10670.8	MRPS21	Alternative 5' Splice Site
ONT.10671.1	CIART	Exon skipping
ONT.10671.3	CIART	Exon skipping
ONT.10671.6	CIART	Exon skipping
ONT.10672.1	CIART	Mutually exclusive exon
ONT.10672.10	CIART	Alternative 3' splice site
ONT.10672.10	CIART	Mutually exclusive exon
ONT.10672.2	CIART	Exon skipping
ONT.10672.7	CIART	Mutually exclusive exon
ONT.10675.1	CA14	Alternative 5' Splice Site
ONT.10675.10	CA14	Alternative 5' Splice Site
ONT.10675.10	CA14	Exon skipping
ONT.10675.10	CA14	Alternative 3' splice site
ONT.10675.11	CA14	Alternative 5' Splice Site
ONT.10675.11	CA14	Intron retention
ONT.10675.12	CA14	Alternative 5' Splice Site
ONT.10675.12	CA14	Alternative 3' splice site
ONT.10675.14	CA14	Alternative 5' Splice Site
ONT.10675.2	CA14	Alternative 5' Splice Site
ONT.10675.20	CA14	Exon skipping
ONT.10675.20	CA14	Alternative 5' Splice Site
ONT.10675.20	CA14	Intron retention
ONT.10675.20	CA14	Alternative 3' splice site
ONT.10675.30	CA14	Intron retention
ONT.10675.30	CA14	Alternative 5' Splice Site
ONT.10675.31	CA14	Alternative 5' Splice Site
ONT.10675.33	CA14	Alternative 5' Splice Site
ONT.10675.33	CA14	Intron retention
ONT.10675.34	CA14	Intron retention
ONT.10675.34	CA14	Alternative 5' Splice Site
ONT.10675.4	CA14	Alternative 5' Splice Site
ONT.10675.43	CA14	Alternative 5' Splice Site
ONT.10675.47	CA14	Intron retention
ONT.10675.47	CA14	Alternative 5' Splice Site
ONT.10675.5	CA14	Alternative 5' Splice Site
ONT.10675.5	CA14	Alternative 3' splice site
ONT.10675.7	CA14	Intron retention
ONT.10675.7	CA14	Alternative 5' Splice Site
ONT.10676.5	ANP32E	Alternative 3' splice site
ONT.1069.1	POLR1E	Alternative 3' splice site
ONT.10690.2	FCGR1A	Exon skipping
ONT.10692.1	HJV	Alternative 3' splice site
ONT.10692.10	HJV	Exon skipping
ONT.10692.11	HJV	Alternative 3' splice site
ONT.10692.12	HJV	Alternative 3' splice site
ONT.10692.13	HJV	Exon skipping
ONT.10692.13	HJV	Alternative 5' Splice Site
ONT.10692.14	HJV	Intron retention
ONT.10692.14	HJV	Alternative 3' splice site
ONT.10692.15	HJV	Exon skipping
ONT.10692.15	HJV	Alternative 5' Splice Site
ONT.10692.17	HJV	Intron retention
ONT.10692.18	HJV	Alternative 5' Splice Site
ONT.10692.18	HJV	Alternative 3' splice site
ONT.10692.2	HJV	Exon skipping
ONT.10692.24	HJV	Exon skipping
ONT.10692.25	HJV	Alternative 3' splice site
ONT.10692.5	HJV	Alternative 3' splice site
ONT.10692.6	HJV	Alternative 3' splice site
ONT.10692.7	HJV	Alternative 5' Splice Site
ONT.10692.7	HJV	Alternative 3' splice site
ONT.10692.9	HJV	Exon skipping
ONT.10694.10	TXNIP	Exon skipping
ONT.10694.10	TXNIP	Alternative 5' Splice Site
ONT.10694.11	TXNIP	Exon skipping
ONT.10694.11	TXNIP	Alternative 5' Splice Site
ONT.10694.5	TXNIP	Intron retention
ONT.10694.6	TXNIP	Intron retention
ONT.10694.7	TXNIP	Intron retention
ONT.10694.8	TXNIP	Intron retention
ONT.10694.9	TXNIP	Intron retention
ONT.10698.15	RBM8A	Alternative 5' Splice Site
ONT.10698.19	RBM8A	Alternative 5' Splice Site
ONT.10698.19	RBM8A	Alternative 3' splice site
ONT.10698.4	RBM8A	Alternative 5' Splice Site
ONT.10698.5	RBM8A	Intron retention
ONT.10698.6	RBM8A	Alternative 5' Splice Site
ONT.10698.7	RBM8A	Alternative 5' Splice Site
ONT.10698.8	RBM8A	Intron retention
ONT.10698.9	RBM8A	Alternative 5' Splice Site
ONT.10698.9	RBM8A	Alternative 3' splice site
ONT.10699.2	ITGA10	Exon skipping
ONT.1070.1	TOMM5	Exon skipping
ONT.1070.5	TOMM5	Exon skipping
ONT.10703.1	RNF115	Alternative 5' Splice Site
ONT.10703.13	RNF115	Alternative 5' Splice Site
ONT.10706.3	GPR89A	Exon skipping
ONT.10713.5	PRKAB2	Exon skipping
ONT.10717.1	PDE4DIP	Alternative 5' Splice Site
ONT.10717.11	PDE4DIP	Alternative 5' Splice Site
ONT.10717.11	PDE4DIP	Alternative 3' splice site
ONT.10717.22	PDE4DIP	Alternative 3' splice site
ONT.10717.23	PDE4DIP	Alternative 3' splice site
ONT.10717.24	PDE4DIP	Alternative 3' splice site
ONT.10717.26	PDE4DIP	Alternative 3' splice site
ONT.10717.27	PDE4DIP	Alternative 3' splice site
ONT.10717.28	PDE4DIP	Alternative 5' Splice Site
ONT.10717.28	PDE4DIP	Alternative 3' splice site
ONT.10717.30	PDE4DIP	Alternative 3' splice site
ONT.10717.31	PDE4DIP	Alternative 3' splice site
ONT.10717.32	PDE4DIP	Alternative 5' Splice Site
ONT.10717.32	PDE4DIP	Alternative 3' splice site
ONT.10717.33	PDE4DIP	Alternative 3' splice site
ONT.10717.34	PDE4DIP	Alternative 5' Splice Site
ONT.10717.34	PDE4DIP	Alternative 3' splice site
ONT.10717.35	PDE4DIP	Alternative 3' splice site
ONT.10717.36	PDE4DIP	Alternative 3' splice site
ONT.10717.37	PDE4DIP	Alternative 3' splice site
ONT.10717.38	PDE4DIP	Alternative 3' splice site
ONT.10717.39	PDE4DIP	Alternative 3' splice site
ONT.10717.4	PDE4DIP	Alternative 3' splice site
ONT.10717.42	PDE4DIP	Alternative 3' splice site
ONT.10717.44	PDE4DIP	Alternative 3' splice site
ONT.10717.46	PDE4DIP	Alternative 3' splice site
ONT.10717.49	PDE4DIP	Alternative 3' splice site
ONT.10717.51	PDE4DIP	Alternative 3' splice site
ONT.10717.52	PDE4DIP	Alternative 3' splice site
ONT.10717.53	PDE4DIP	Alternative 3' splice site
ONT.10717.57	PDE4DIP	Alternative 3' splice site
ONT.10717.58	PDE4DIP	Alternative 3' splice site
ONT.10717.59	PDE4DIP	Alternative 3' splice site
ONT.10717.6	PDE4DIP	Intron retention
ONT.10717.8	PDE4DIP	Alternative 5' Splice Site
ONT.10717.8	PDE4DIP	Exon skipping
ONT.10717.9	PDE4DIP	Alternative 5' Splice Site
ONT.10722.3	WARS2	Exon skipping
ONT.10742.1	SIKE1	Exon skipping
ONT.10744.1	CSDE1	Alternative 5' Splice Site
ONT.10744.13	CSDE1	Alternative 5' Splice Site
ONT.10744.19	CSDE1	Alternative 5' Splice Site
ONT.10744.2	CSDE1	Alternative 5' Splice Site
ONT.10744.20	CSDE1	Alternative 5' Splice Site
ONT.10744.3	CSDE1	Alternative 5' Splice Site
ONT.10744.4	CSDE1	Alternative 5' Splice Site
ONT.10744.5	CSDE1	Alternative 5' Splice Site
ONT.10745.1	CSDE1	Exon skipping
ONT.10745.3	CSDE1	Exon skipping
ONT.10747.1	AMPD1	Exon skipping
ONT.10747.1	AMPD1	Alternative 5' Splice Site
ONT.10747.11	AMPD1	Exon skipping
ONT.10747.11	AMPD1	Alternative 5' Splice Site
ONT.10747.11	AMPD1	Intron retention
ONT.10747.17	AMPD1	Intron retention
ONT.10747.18	AMPD1	Exon skipping
ONT.10747.18	AMPD1	Alternative 5' Splice Site
ONT.10747.2	AMPD1	Exon skipping
ONT.10747.2	AMPD1	Alternative 5' Splice Site
ONT.10747.2	AMPD1	Intron retention
ONT.10747.22	AMPD1	Exon skipping
ONT.10747.22	AMPD1	Alternative 5' Splice Site
ONT.10747.26	AMPD1	Alternative 5' Splice Site
ONT.10747.26	AMPD1	Alternative 3' splice site
ONT.10747.3	AMPD1	Alternative 5' Splice Site
ONT.10747.3	AMPD1	Alternative 3' splice site
ONT.10747.32	AMPD1	Alternative 5' Splice Site
ONT.10747.4	AMPD1	Exon skipping
ONT.10747.4	AMPD1	Alternative 5' Splice Site
ONT.10747.4	AMPD1	Intron retention
ONT.10747.5	AMPD1	Alternative 5' Splice Site
ONT.10747.6	AMPD1	Exon skipping
ONT.10747.6	AMPD1	Alternative 5' Splice Site
ONT.10747.6	AMPD1	Intron retention
ONT.10747.7	AMPD1	Exon skipping
ONT.10747.7	AMPD1	Alternative 5' Splice Site
ONT.10747.8	AMPD1	Exon skipping
ONT.10747.8	AMPD1	Alternative 5' Splice Site
ONT.10747.8	AMPD1	Intron retention
ONT.10747.8	AMPD1	Alternative 3' splice site
ONT.10749.10	BCAS2	Exon skipping
ONT.10749.13	BCAS2	Exon skipping
ONT.10749.13	BCAS2	Alternative 5' Splice Site
ONT.10749.14	BCAS2	Exon skipping
ONT.10749.3	BCAS2	Exon skipping
ONT.10749.3	BCAS2	Alternative 5' Splice Site
ONT.10749.4	BCAS2	Alternative 5' Splice Site
ONT.10749.4	BCAS2	Exon skipping
ONT.10749.5	BCAS2	Exon skipping
ONT.10749.5	BCAS2	Alternative 5' Splice Site
ONT.10749.7	BCAS2	Exon skipping
ONT.10751.1	HIPK1	Alternative 3' splice site
ONT.10762.1	SLC16A1	Alternative 5' Splice Site
ONT.10763.2	PPM1J	Alternative 5' Splice Site
ONT.10763.2	PPM1J	Intron retention
ONT.10763.3	PPM1J	Alternative 5' Splice Site
ONT.10763.3	PPM1J	Intron retention
ONT.10763.4	PPM1J	Alternative 5' Splice Site
ONT.10763.4	PPM1J	Intron retention
ONT.10763.5	PPM1J	Intron retention
ONT.10763.6	PPM1J	Intron retention
ONT.10772.11	RAP1A	Exon skipping
ONT.10772.15	RAP1A	Exon skipping
ONT.10772.16	RAP1A	Exon skipping
ONT.10772.17	RAP1A	Exon skipping
ONT.10772.3	RAP1A	Exon skipping
ONT.10772.3	RAP1A	Alternative 5' Splice Site
ONT.10772.4	RAP1A	Exon skipping
ONT.10772.9	RAP1A	Exon skipping
ONT.10773.11	ATP5PB	Alternative 3' splice site
ONT.10773.14	ATP5PB	Alternative 3' splice site
ONT.10773.9	ATP5PB	Exon skipping
ONT.10774.5	WDR77	Intron retention
ONT.10774.6	WDR77	Exon skipping
ONT.10780.5	SLC16A4	Exon skipping
ONT.10787.2	AHCYL1	Exon skipping
ONT.10790.1	GSTM1	Mutually exclusive exon
ONT.10790.13	GSTM1	Alternative 5' Splice Site
ONT.10790.2	GSTM1	Mutually exclusive exon
ONT.10790.23	GSTM1	Exon skipping
ONT.10790.23	GSTM1	Alternative 3' splice site
ONT.10790.25	GSTM1	Intron retention
ONT.10790.3	GSTM2	Mutually exclusive exon
ONT.10790.6	GSTM1	Mutually exclusive exon
ONT.10790.7	GSTM1	Mutually exclusive exon
ONT.108.11	GINM1	Exon skipping
ONT.108.3	GINM1	Exon skipping
ONT.108.5	GINM1	Exon skipping
ONT.10801.7	PSMA5	Intron retention
ONT.10801.8	PSMA5	Exon skipping
ONT.10806.15	SARS	Alternative 5' Splice Site
ONT.10806.6	SARS	Intron retention
ONT.10808.10	TAF13	Alternative 3' splice site
ONT.10810.2	AKNAD1	Exon skipping
ONT.10816.2	AMY2	Exon skipping
ONT.10818.3	RNPC3	Alternative 5' Splice Site
ONT.10818.6	RNPC3	Exon skipping
ONT.10828.1	RTCA	Alternative 3' splice site
ONT.10832.1	LRRC39	Alternative 5' Splice Site
ONT.10832.10	LRRC39	Alternative 5' Splice Site
ONT.10832.13	LRRC39	Alternative 5' Splice Site
ONT.10832.14	LRRC39	Alternative 5' Splice Site
ONT.10832.16	LRRC39	Alternative 5' Splice Site
ONT.10832.19	LRRC39	Alternative 5' Splice Site
ONT.10832.2	LRRC39	Alternative 5' Splice Site
ONT.10832.22	LRRC39	Alternative 5' Splice Site
ONT.10832.23	LRRC39	Alternative 5' Splice Site
ONT.10832.26	LRRC39	Alternative 5' Splice Site
ONT.10832.27	LRRC39	Alternative 5' Splice Site
ONT.10832.4	LRRC39	Alternative 5' Splice Site
ONT.10832.5	LRRC39	Exon skipping
ONT.10832.5	LRRC39	Alternative 5' Splice Site
ONT.10832.6	LRRC39	Alternative 5' Splice Site
ONT.10845.1	PALMD	Exon skipping
ONT.10845.2	PALMD	Exon skipping
ONT.10845.2	PALMD	Intron retention
ONT.10845.5	PALMD	Exon skipping
ONT.10845.6	PALMD	Exon skipping
ONT.10845.7	PALMD	Exon skipping
ONT.10845.9	PALMD	Exon skipping
ONT.10850.1	RWDD3	Exon skipping
ONT.10850.3	RWDD3	Exon skipping
ONT.10850.4	RWDD3	Exon skipping
ONT.10853.1	ALG14	Exon skipping
ONT.10857.1	ABCD3	Mutually exclusive exon
ONT.10857.2	ABCD3	Mutually exclusive exon
ONT.10868.10	TMED5	Alternative 5' Splice Site
ONT.10868.2	TMED5	Alternative 5' Splice Site
ONT.10868.4	TMED5	Alternative 5' Splice Site
ONT.10868.5	TMED5	Alternative 5' Splice Site
ONT.10868.5	TMED5	Intron retention
ONT.10868.6	TMED5	Alternative 5' Splice Site
ONT.1087.1	XPA	Exon skipping
ONT.1087.2	XPA	Exon skipping
ONT.10870.2	MTF2	Alternative 5' Splice Site
ONT.10871.1	DIPK1A	Alternative 5' Splice Site
ONT.10871.2	DIPK1A	Alternative 5' Splice Site
ONT.10871.4	DIPK1A	Alternative 5' Splice Site
ONT.10871.7	DIPK1A	Alternative 5' Splice Site
ONT.10872.17	RPL5	Exon skipping
ONT.10888.1	KYAT3	Exon skipping
ONT.10888.1	KYAT3	Alternative 5' Splice Site
ONT.10888.11	KYAT3	Exon skipping
ONT.10888.11	KYAT3	Alternative 5' Splice Site
ONT.10888.13	KYAT3	Alternative 5' Splice Site
ONT.10888.15	KYAT3	Alternative 5' Splice Site
ONT.10888.15	KYAT3	Exon skipping
ONT.10888.18	KYAT3	Alternative 5' Splice Site
ONT.10888.19	KYAT3	Alternative 5' Splice Site
ONT.10888.2	KYAT3	Exon skipping
ONT.10888.2	KYAT3	Alternative 5' Splice Site
ONT.10888.20	KYAT3	Alternative 5' Splice Site
ONT.10888.20	KYAT3	Exon skipping
ONT.10888.23	KYAT3	Alternative 5' Splice Site
ONT.10888.24	KYAT3	Exon skipping
ONT.10888.24	KYAT3	Alternative 5' Splice Site
ONT.10888.3	KYAT3	Exon skipping
ONT.10888.3	KYAT3	Alternative 5' Splice Site
ONT.10888.30	KYAT3	Exon skipping
ONT.10888.30	KYAT3	Alternative 5' Splice Site
ONT.10888.31	KYAT3	Exon skipping
ONT.10888.31	KYAT3	Alternative 5' Splice Site
ONT.10888.35	KYAT3	Exon skipping
ONT.10888.35	KYAT3	Alternative 5' Splice Site
ONT.10888.36	KYAT3	Exon skipping
ONT.10888.36	KYAT3	Alternative 5' Splice Site
ONT.10888.37	KYAT3	Alternative 5' Splice Site
ONT.10888.4	KYAT3	Exon skipping
ONT.10888.4	KYAT3	Alternative 5' Splice Site
ONT.10888.43	KYAT3	Alternative 5' Splice Site
ONT.10888.45	KYAT3	Alternative 5' Splice Site
ONT.10888.46	KYAT3	Alternative 5' Splice Site
ONT.10888.5	KYAT3	Exon skipping
ONT.10888.5	KYAT3	Alternative 5' Splice Site
ONT.10888.50	KYAT3	Alternative 5' Splice Site
ONT.10888.51	KYAT3	Alternative 5' Splice Site
ONT.10888.56	KYAT3	Alternative 5' Splice Site
ONT.10888.6	KYAT3	Exon skipping
ONT.10888.6	KYAT3	Alternative 5' Splice Site
ONT.10888.8	KYAT3	Exon skipping
ONT.10888.8	KYAT3	Alternative 5' Splice Site
ONT.10888.9	KYAT3	Alternative 5' Splice Site
ONT.10888.9	KYAT3	Exon skipping
ONT.1089.1	NANS	Alternative 5' Splice Site
ONT.1089.14	NANS	Alternative 5' Splice Site
ONT.1089.2	NANS	Alternative 5' Splice Site
ONT.1089.22	NANS	Alternative 5' Splice Site
ONT.1089.4	NANS	Alternative 5' Splice Site
ONT.1089.7	NANS	Alternative 5' Splice Site
ONT.10890.1	GTF2B	Exon skipping
ONT.10894.2	LMO4	Exon skipping
ONT.10895.5	SELENOF	Intron retention
ONT.10895.7	SELENOF	Intron retention
ONT.10897.4	SH3GLB1	Exon skipping
ONT.10899.1	CLCA2	Intron retention
ONT.1090.2	NANS	Exon skipping
ONT.10900.1	COL24A1	Exon skipping
ONT.10900.10	COL24A1	Exon skipping
ONT.10900.2	COL24A1	Exon skipping
ONT.10900.2	COL24A1	Alternative 5' Splice Site
ONT.10900.3	COL24A1	Alternative 5' Splice Site
ONT.10900.4	COL24A1	Exon skipping
ONT.10900.5	COL24A1	Alternative 5' Splice Site
ONT.10901.3	ZNHIT6	Exon skipping
ONT.10906.1	C1orf52	Exon skipping
ONT.10906.2	C1orf52	Exon skipping
ONT.10906.3	C1orf52	Exon skipping
ONT.10906.4	C1orf52	Exon skipping
ONT.10906.5	C1orf52	Exon skipping
ONT.10906.9	C1orf52	Exon skipping
ONT.10913.1	CHKB	Intron retention
ONT.10913.2	CHKB	Exon skipping
ONT.10913.2	CHKB	Intron retention
ONT.10913.4	CHKB	Intron retention
ONT.10914.13	CPT1B	Alternative 5' Splice Site
ONT.10914.13	CPT1B	Mutually exclusive exon
ONT.10914.15	CPT1B	Intron retention
ONT.10914.2	CPT1B	Intron retention
ONT.10914.2	CPT1B	Alternative 3' splice site
ONT.10914.2	CPT1B	Mutually exclusive exon
ONT.10914.4	CPT1B	Alternative 3' splice site
ONT.10914.6	CPT1B	Intron retention
ONT.10915.1	SCO2	Exon skipping
ONT.10920.1	PPP6R2	Alternative 3' splice site
ONT.10926.1	MAPK12	Alternative 5' Splice Site
ONT.10926.10	MAPK12	Alternative 5' Splice Site
ONT.10926.11	MAPK12	Alternative 5' Splice Site
ONT.10926.15	MAPK12	Alternative 5' Splice Site
ONT.10926.2	MAPK12	Alternative 5' Splice Site
ONT.10926.3	MAPK12	Alternative 5' Splice Site
ONT.10926.7	MAPK12	Alternative 5' Splice Site
ONT.10926.8	MAPK12	Alternative 5' Splice Site
ONT.10926.9	MAPK12	Alternative 3' splice site
ONT.10928.2	HDAC10	Intron retention
ONT.10929.2	TUBGCP6	Alternative 5' Splice Site
ONT.10932.1	TRABD	Alternative 5' Splice Site
ONT.10936.2	ALG12	Exon skipping
ONT.10936.2	ALG12	Alternative 5' Splice Site
ONT.10945.1	TRMU	Alternative 3' splice site
ONT.10945.3	TRMU	Intron retention
ONT.10945.3	TRMU	Alternative 3' splice site
ONT.10947.10	CDPF1	Alternative 5' Splice Site
ONT.10947.2	CDPF1	Alternative 5' Splice Site
ONT.1095.1	SEC61B	Exon skipping
ONT.1095.2	SEC61B	Exon skipping
ONT.1095.3	SEC61B	Exon skipping
ONT.1095.5	SEC61B	Exon skipping
ONT.1095.7	SEC61B	Exon skipping
ONT.1095.8	SEC61B	Exon skipping
ONT.10972.1	PARVB	Alternative 3' splice site
ONT.10972.4	PARVB	Exon skipping
ONT.10979.1	TTLL1	Exon skipping
ONT.10979.2	TTLL1	Alternative 5' Splice Site
ONT.10987.4	RRP7A	Intron retention
ONT.10988.2	SERHL2	Alternative 5' Splice Site
ONT.10992.3	NDUFA6	Exon skipping
ONT.11004.1	DESI1	Exon skipping
ONT.11012.26	ACO2	Intron retention
ONT.11013.11	PHF5A	Intron retention
ONT.11013.4	PHF5A	Alternative 3' splice site
ONT.11013.6	PHF5A	Alternative 3' splice site
ONT.11013.8	PHF5A	Alternative 3' splice site
ONT.11013.9	PHF5A	Alternative 3' splice site
ONT.1102.7	ERP44	Alternative 5' Splice Site
ONT.11027.10	RBX1	Exon skipping
ONT.11027.10	RBX1	Alternative 5' Splice Site
ONT.11027.11	RBX1	Alternative 5' Splice Site
ONT.11027.13	RBX1	Exon skipping
ONT.11027.16	RBX1	Alternative 5' Splice Site
ONT.11027.17	RBX1	Exon skipping
ONT.11027.19	RBX1	Exon skipping
ONT.11027.19	RBX1	Alternative 5' Splice Site
ONT.11027.2	RBX1	Exon skipping
ONT.11027.2	RBX1	Alternative 5' Splice Site
ONT.11027.3	RBX1	Exon skipping
ONT.11027.3	RBX1	Alternative 5' Splice Site
ONT.11027.4	RBX1	Exon skipping
ONT.11027.4	RBX1	Alternative 5' Splice Site
ONT.11027.8	RBX1	Exon skipping
ONT.11027.8	RBX1	Alternative 5' Splice Site
ONT.11029.18	ST13	Alternative 3' splice site
ONT.11033.1	SGSM3	Alternative 5' Splice Site
ONT.11033.6	SGSM3	Alternative 3' splice site
ONT.11034.15	ADSL	Intron retention
ONT.11034.20	ADSL	Alternative 3' splice site
ONT.11034.21	ADSL	Exon skipping
ONT.11034.28	ADSL	Alternative 3' splice site
ONT.11034.9	ADSL	Alternative 5' Splice Site
ONT.11034.9	ADSL	Alternative 3' splice site
ONT.11038.1	TNRC6B	Alternative 5' Splice Site
ONT.11039.6	RPS19BP1	Alternative 3' splice site
ONT.11041.2	ATF4	Alternative 3' splice site
ONT.11046.10	RPL3	Alternative 3' splice site
ONT.11046.12	RPL3	Alternative 3' splice site
ONT.11046.2	RPL3	Alternative 3' splice site
ONT.11046.3	RPL3	Alternative 3' splice site
ONT.11046.4	RPL3	Intron retention
ONT.11046.9	RPL3	Intron retention
ONT.11047.1	--	Exon skipping
ONT.11047.2	--	Exon skipping
ONT.11047.3	--	Exon skipping
ONT.1105.1	TEX10	Alternative 5' Splice Site
ONT.11062.2	TOMM22	Intron retention
ONT.11080.1	POLR2F	Exon skipping
ONT.11080.5	POLR2F	Exon skipping
ONT.11083.15	EIF3L	Alternative 5' Splice Site
ONT.111.1	--	Exon skipping
ONT.111.3	--	Exon skipping
ONT.11105.2	PVALB	Alternative 5' Splice Site
ONT.11107.1	EIF3D	Intron retention
ONT.11107.13	EIF3D	Alternative 5' Splice Site
ONT.11107.13	EIF3D	Intron retention
ONT.11107.14	EIF3D	Alternative 5' Splice Site
ONT.11107.16	EIF3D	Alternative 5' Splice Site
ONT.11107.17	EIF3D	Intron retention
ONT.11107.17	EIF3D	Alternative 5' Splice Site
ONT.11107.19	EIF3D	Alternative 5' Splice Site
ONT.11107.21	EIF3D	Alternative 5' Splice Site
ONT.11107.22	EIF3D	Alternative 5' Splice Site
ONT.11107.3	EIF3D	Alternative 5' Splice Site
ONT.11107.5	EIF3D	Alternative 5' Splice Site
ONT.11107.5	EIF3D	Alternative 3' splice site
ONT.11107.7	EIF3D	Alternative 5' Splice Site
ONT.11110.2	TXN2	Exon skipping
ONT.11110.2	TXN2	Mutually exclusive exon
ONT.11110.3	TXN2	Exon skipping
ONT.11110.3	TXN2	Mutually exclusive exon
ONT.11110.6	TXN2	Exon skipping
ONT.11110.6	TXN2	Mutually exclusive exon
ONT.11110.7	TXN2	Exon skipping
ONT.11114.3	RBFOX2	Alternative 3' splice site
ONT.11129.1	MTERF2	Exon skipping
ONT.11129.2	MTERF2	Exon skipping
ONT.11129.3	MTERF2	Exon skipping
ONT.11129.4	MTERF2	Alternative 3' splice site
ONT.11129.8	MTERF2	Alternative 3' splice site
ONT.11144.2	FKBP11	Alternative 5' Splice Site
ONT.11144.3	FKBP11	Alternative 3' splice site
ONT.11144.4	FKBP11	Exon skipping
ONT.11144.4	FKBP11	Alternative 5' Splice Site
ONT.11146.1	PRKAG1	Alternative 5' Splice Site
ONT.11146.1	PRKAG1	Intron retention
ONT.11146.2	PRKAG1	Alternative 5' Splice Site
ONT.11146.5	PRKAG1	Alternative 3' splice site
ONT.11146.8	PRKAG1	Exon skipping
ONT.11154.2	MCRS1	Exon skipping
ONT.11154.2	MCRS1	Alternative 3' splice site
ONT.11154.3	MCRS1	Intron retention
ONT.11157.1	TMBIM6	Alternative 5' Splice Site
ONT.11157.10	TMBIM6	Alternative 5' Splice Site
ONT.11157.19	TMBIM6	Intron retention
ONT.11157.2	TMBIM6	Alternative 5' Splice Site
ONT.11157.2	TMBIM6	Intron retention
ONT.11157.3	TMBIM6	Alternative 5' Splice Site
ONT.11157.4	TMBIM6	Alternative 5' Splice Site
ONT.11157.5	TMBIM6	Alternative 5' Splice Site
ONT.11164.9	GPD1	Alternative 3' splice site
ONT.11165.1	SMARCD1	Exon skipping
ONT.11165.7	SMARCD1	Exon skipping
ONT.11166.2	CERS5	Alternative 5' Splice Site
ONT.11166.4	CERS5	Alternative 5' Splice Site
ONT.11166.5	CERS5	Exon skipping
ONT.11166.8	CERS5	Exon skipping
ONT.11171.1	ATF1	Exon skipping
ONT.11171.12	ATF1	Exon skipping
ONT.11171.14	ATF1	Exon skipping
ONT.11171.3	ATF1	Exon skipping
ONT.11171.5	ATF1	Exon skipping
ONT.11171.7	ATF1	Exon skipping
ONT.11171.8	ATF1	Exon skipping
ONT.11178.1	ATG101	Alternative 3' splice site
ONT.1118.3	NIPSNAP3A	Alternative 3' splice site
ONT.11183.1	EIF4B	Alternative 5' Splice Site
ONT.11183.12	EIF4B	Alternative 5' Splice Site
ONT.11183.16	EIF4B	Alternative 5' Splice Site
ONT.11183.17	EIF4B	Alternative 5' Splice Site
ONT.11183.18	EIF4B	Alternative 5' Splice Site
ONT.11183.19	EIF4B	Alternative 5' Splice Site
ONT.11183.21	EIF4B	Alternative 5' Splice Site
ONT.11183.23	EIF4B	Alternative 5' Splice Site
ONT.11183.27	EIF4B	Alternative 5' Splice Site
ONT.11183.28	EIF4B	Alternative 5' Splice Site
ONT.11183.3	EIF4B	Alternative 5' Splice Site
ONT.11183.30	EIF4B	Alternative 5' Splice Site
ONT.11183.32	EIF4B	Alternative 5' Splice Site
ONT.11183.4	EIF4B	Alternative 5' Splice Site
ONT.11183.8	EIF4B	Alternative 5' Splice Site
ONT.11193.10	C12orf10	Exon skipping
ONT.11193.2	C12orf10	Exon skipping
ONT.11193.2	C12orf10	Alternative 5' Splice Site
ONT.11193.4	C12orf10	Exon skipping
ONT.11193.5	C12orf10	Alternative 5' Splice Site
ONT.11194.2	C12orf10	Exon skipping
ONT.11194.5	C12orf10	Exon skipping
ONT.11194.7	C12orf10	Exon skipping
ONT.11195.1	AAAS	Alternative 5' Splice Site
ONT.11200.10	PRR13	Alternative 5' Splice Site
ONT.11200.11	PRR13	Alternative 5' Splice Site
ONT.11200.2	PRR13	Alternative 5' Splice Site
ONT.11200.5	PRR13	Alternative 5' Splice Site
ONT.11202.1	PCBP2	Alternative 3' splice site
ONT.11202.3	PCBP2	Exon skipping
ONT.11202.6	PCBP2	Alternative 3' splice site
ONT.11203.10	TARBP2	Exon skipping
ONT.11203.5	TARBP2	Alternative 3' splice site
ONT.11203.8	TARBP2	Intron retention
ONT.11203.9	TARBP2	Exon skipping
ONT.11207.7	ATP5MC2	Exon skipping
ONT.11208.2	CALCOCO1	Alternative 5' Splice Site
ONT.11219.1	SMUG1	Intron retention
ONT.1122.11	TMEM38B	Alternative 3' splice site
ONT.1122.4	TMEM38B	Exon skipping
ONT.11222.1	CBX5	Exon skipping
ONT.11222.11	CBX5	Exon skipping
ONT.11222.13	CBX5	Exon skipping
ONT.11222.7	CBX5	Exon skipping
ONT.11222.9	CBX5	Exon skipping
ONT.11223.2	HNRNPA1	Exon skipping
ONT.11223.3	HNRNPA1	Exon skipping
ONT.11224.2	COPZ1	Exon skipping
ONT.11224.7	COPZ1	Exon skipping
ONT.11230.3	PPP1R1A	Exon skipping
ONT.11232.1	ITGA7	Exon skipping
ONT.11233.2	BLOC1S1	Exon skipping
ONT.11234.3	CD63	Alternative 5' Splice Site
ONT.11237.15	SARNP	Alternative 5' Splice Site
ONT.11237.15	SARNP	Mutually exclusive exon
ONT.11237.18	SARNP	Exon skipping
ONT.11237.18	SARNP	Alternative 5' Splice Site
ONT.11237.18	SARNP	Mutually exclusive exon
ONT.11237.22	SARNP	Mutually exclusive exon
ONT.11237.3	SARNP	Exon skipping
ONT.11237.3	SARNP	Alternative 5' Splice Site
ONT.11237.31	SARNP	Alternative 5' Splice Site
ONT.11237.31	SARNP	Mutually exclusive exon
ONT.11237.32	SARNP	Exon skipping
ONT.11237.32	SARNP	Alternative 5' Splice Site
ONT.11237.34	SARNP	Exon skipping
ONT.11237.34	SARNP	Alternative 5' Splice Site
ONT.11237.4	SARNP	Alternative 3' splice site
ONT.11237.4	SARNP	Mutually exclusive exon
ONT.11237.5	SARNP	Mutually exclusive exon
ONT.11237.6	SARNP	Exon skipping
ONT.11237.7	SARNP	Exon skipping
ONT.11238.1	ORMDL2	Exon skipping
ONT.11238.3	ORMDL2	Alternative 3' splice site
ONT.11245.1	CDK2	Exon skipping
ONT.11245.2	CDK2	Exon skipping
ONT.11245.3	CDK2	Exon skipping
ONT.11247.1	SUOX	Exon skipping
ONT.11248.1	RPS26	Alternative 5' Splice Site
ONT.11248.4	RPS26	Alternative 5' Splice Site
ONT.11250.3	--	Alternative 5' Splice Site
ONT.11250.4	--	Alternative 5' Splice Site
ONT.11252.3	--	Mutually exclusive exon
ONT.11252.5	--	Mutually exclusive exon
ONT.11256.10	MYL6	Alternative 5' Splice Site
ONT.11256.13	MYL3	Exon skipping
ONT.11256.13	MYL3	Alternative 5' Splice Site
ONT.11256.13	MYL3	Mutually exclusive exon
ONT.11256.16	MYL6	Alternative 3' splice site
ONT.11256.3	MYL6	Alternative 5' Splice Site
ONT.11256.4	MYL6	Alternative 5' Splice Site
ONT.11256.4	MYL6	Alternative 3' splice site
ONT.11256.8	MYL3	Intron retention
ONT.11256.9	MYL6	Exon skipping
ONT.11256.9	MYL6	Alternative 5' Splice Site
ONT.11256.9	MYL6	Alternative 3' splice site
ONT.11256.9	MYL6	Mutually exclusive exon
ONT.11257.1	MYL6	Exon skipping
ONT.11257.1	MYL6	Alternative 5' Splice Site
ONT.11257.1	MYL6	Alternative 3' splice site
ONT.11257.10	MYL6	Exon skipping
ONT.11257.10	MYL6	Intron retention
ONT.11257.10	MYL6	Alternative 3' splice site
ONT.11257.13	MYL6	Exon skipping
ONT.11257.13	MYL6	Alternative 5' Splice Site
ONT.11257.13	MYL6	Alternative 3' splice site
ONT.11257.15	MYL6	Exon skipping
ONT.11257.15	MYL6	Alternative 3' splice site
ONT.11257.16	MYL6	Exon skipping
ONT.11257.16	MYL6	Alternative 3' splice site
ONT.11257.17	MYL6	Exon skipping
ONT.11257.17	MYL6	Intron retention
ONT.11257.17	MYL6	Alternative 3' splice site
ONT.11257.2	MYL6	Exon skipping
ONT.11257.2	MYL6	Alternative 3' splice site
ONT.11257.22	MYL6	Exon skipping
ONT.11257.22	MYL6	Alternative 3' splice site
ONT.11257.23	MYL6	Intron retention
ONT.11257.23	MYL6	Alternative 3' splice site
ONT.11257.24	MYL6	Intron retention
ONT.11257.25	MYL6	Exon skipping
ONT.11257.25	MYL6	Alternative 5' Splice Site
ONT.11257.25	MYL6	Alternative 3' splice site
ONT.11257.26	MYL6	Exon skipping
ONT.11257.26	MYL6	Alternative 3' splice site
ONT.11257.28	MYL6	Exon skipping
ONT.11257.28	MYL6	Intron retention
ONT.11257.28	MYL6	Alternative 3' splice site
ONT.11257.29	MYL6	Exon skipping
ONT.11257.29	MYL6	Alternative 5' Splice Site
ONT.11257.29	MYL6	Alternative 3' splice site
ONT.11257.3	MYL6	Exon skipping
ONT.11257.3	MYL6	Alternative 3' splice site
ONT.11257.32	MYL6	Exon skipping
ONT.11257.32	MYL6	Alternative 5' Splice Site
ONT.11257.32	MYL6	Intron retention
ONT.11257.32	MYL6	Alternative 3' splice site
ONT.11257.33	MYL6	Exon skipping
ONT.11257.33	MYL6	Alternative 5' Splice Site
ONT.11257.33	MYL6	Alternative 3' splice site
ONT.11257.38	MYL6	Intron retention
ONT.11257.40	MYL6	Exon skipping
ONT.11257.40	MYL6	Alternative 5' Splice Site
ONT.11257.40	MYL6	Alternative 3' splice site
ONT.11257.43	MYL6	Intron retention
ONT.11257.46	MYL6	Exon skipping
ONT.11257.46	MYL6	Alternative 5' Splice Site
ONT.11257.46	MYL6	Alternative 3' splice site
ONT.11257.48	MYL6	Intron retention
ONT.11257.5	MYL6	Intron retention
ONT.11257.50	MYL6	Alternative 5' Splice Site
ONT.11257.51	MYL6	Alternative 3' splice site
ONT.11257.52	MYL6	Exon skipping
ONT.11257.52	MYL6	Alternative 5' Splice Site
ONT.11257.52	MYL6	Alternative 3' splice site
ONT.11257.53	MYL6	Exon skipping
ONT.11257.53	MYL6	Alternative 3' splice site
ONT.11257.6	MYL6	Intron retention
ONT.11257.7	MYL6	Exon skipping
ONT.11257.7	MYL6	Alternative 3' splice site
ONT.11264.1	NABP2	Exon skipping
ONT.11273.5	CNPY2	Intron retention
ONT.11285.13	PTGES3	Alternative 5' Splice Site
ONT.11285.13	PTGES3	Mutually exclusive exon
ONT.11285.2	PTGES3	Exon skipping
ONT.11285.2	PTGES3	Mutually exclusive exon
ONT.11285.4	PTGES3	Mutually exclusive exon
ONT.11285.5	PTGES3	Exon skipping
ONT.11285.5	PTGES3	Mutually exclusive exon
ONT.11285.9	PTGES3	Exon skipping
ONT.11285.9	PTGES3	Mutually exclusive exon
ONT.11288.1	NACA	Exon skipping
ONT.11288.1	NACA	Alternative 3' splice site
ONT.11288.12	NACA	Alternative 3' splice site
ONT.11288.16	NACA	Exon skipping
ONT.11288.17	NACA	Exon skipping
ONT.11288.17	NACA	Alternative 3' splice site
ONT.11288.4	NACA	Exon skipping
ONT.11290.1	HSD17B6	Exon skipping
ONT.11299.1	SHMT2	Exon skipping
ONT.11299.2	SHMT2	Exon skipping
ONT.11299.2	SHMT2	Alternative 5' Splice Site
ONT.11299.7	SHMT2	Alternative 5' Splice Site
ONT.11300.1	NDUFA4L2	Exon skipping
ONT.11300.5	NDUFA4L2	Intron retention
ONT.11301.1	STAC3	Alternative 3' splice site
ONT.11301.12	STAC3	Alternative 3' splice site
ONT.11301.14	STAC3	Alternative 3' splice site
ONT.11301.16	STAC3	Alternative 3' splice site
ONT.11301.17	STAC3	Alternative 3' splice site
ONT.11301.19	STAC3	Alternative 3' splice site
ONT.11301.20	STAC3	Alternative 3' splice site
ONT.11301.21	STAC3	Alternative 3' splice site
ONT.11301.22	STAC3	Alternative 3' splice site
ONT.11301.23	STAC3	Alternative 3' splice site
ONT.11301.24	STAC3	Alternative 3' splice site
ONT.11301.25	STAC3	Exon skipping
ONT.11301.29	STAC3	Intron retention
ONT.11301.29	STAC3	Alternative 3' splice site
ONT.11301.30	STAC3	Alternative 3' splice site
ONT.11301.31	STAC3	Alternative 3' splice site
ONT.11301.32	STAC3	Alternative 3' splice site
ONT.11301.34	STAC3	Alternative 3' splice site
ONT.11301.4	STAC3	Alternative 3' splice site
ONT.11301.6	STAC3	Exon skipping
ONT.11301.7	STAC3	Alternative 3' splice site
ONT.11301.8	STAC3	Intron retention
ONT.11301.8	STAC3	Alternative 3' splice site
ONT.11303.2	MARS	Exon skipping
ONT.11303.2	MARS	Alternative 5' Splice Site
ONT.11304.6	DDIT3	Intron retention
ONT.11307.1	DCTN2	Alternative 5' Splice Site
ONT.11307.12	DCTN2	Alternative 5' Splice Site
ONT.11307.14	DCTN2	Alternative 5' Splice Site
ONT.11307.2	DCTN2	Alternative 5' Splice Site
ONT.11311.1	SLC26A10	Alternative 5' Splice Site
ONT.11311.2	SLC26A10	Alternative 5' Splice Site
ONT.11311.5	SLC26A10	Alternative 5' Splice Site
ONT.11311.6	B4GALNT1	Alternative 5' Splice Site
ONT.11313.1	OS9	Exon skipping
ONT.11315.4	CDK4	Intron retention
ONT.11315.8	CDK4	Intron retention
ONT.11322.6	TSFM	Alternative 5' Splice Site
ONT.11322.6	TSFM	Alternative 3' splice site
ONT.11332.2	USP15	Exon skipping
ONT.11332.5	USP15	Exon skipping
ONT.11335.4	RXYLT1	Exon skipping
ONT.11338.3	TBK1	Alternative 5' Splice Site
ONT.11344.4	LLPH	Alternative 3' splice site
ONT.11361.3	CCT2	Intron retention
ONT.11361.7	CCT2	Alternative 3' splice site
ONT.11368.5	CNOT2	Alternative 5' Splice Site
ONT.11368.7	CNOT2	Alternative 5' Splice Site
ONT.11369.2	CNOT2	Exon skipping
ONT.11369.5	CNOT2	Exon skipping
ONT.11381.1	NAP1L1	Exon skipping
ONT.11381.1	NAP1L1	Alternative 5' Splice Site
ONT.11381.10	NAP1L1	Exon skipping
ONT.11381.10	NAP1L1	Alternative 5' Splice Site
ONT.11381.11	NAP1L1	Alternative 5' Splice Site
ONT.11381.12	NAP1L1	Alternative 5' Splice Site
ONT.11381.14	NAP1L1	Exon skipping
ONT.11381.14	NAP1L1	Alternative 5' Splice Site
ONT.11381.2	NAP1L1	Alternative 5' Splice Site
ONT.11381.32	NAP1L1	Exon skipping
ONT.11381.32	NAP1L1	Alternative 5' Splice Site
ONT.11381.34	NAP1L1	Alternative 5' Splice Site
ONT.11381.35	NAP1L1	Alternative 5' Splice Site
ONT.11381.36	NAP1L1	Exon skipping
ONT.11381.36	NAP1L1	Alternative 5' Splice Site
ONT.11381.37	NAP1L1	Exon skipping
ONT.11381.37	NAP1L1	Alternative 5' Splice Site
ONT.11381.38	NAP1L1	Alternative 5' Splice Site
ONT.11381.39	NAP1L1	Alternative 5' Splice Site
ONT.11381.4	NAP1L1	Exon skipping
ONT.11381.4	NAP1L1	Alternative 5' Splice Site
ONT.11381.40	NAP1L1	Alternative 5' Splice Site
ONT.11381.41	NAP1L1	Exon skipping
ONT.11381.41	NAP1L1	Alternative 5' Splice Site
ONT.11381.42	NAP1L1	Exon skipping
ONT.11381.42	NAP1L1	Alternative 5' Splice Site
ONT.11381.43	NAP1L1	Alternative 5' Splice Site
ONT.11381.5	NAP1L1	Exon skipping
ONT.11381.5	NAP1L1	Alternative 5' Splice Site
ONT.11381.51	NAP1L1	Exon skipping
ONT.11381.59	NAP1L1	Exon skipping
ONT.11381.6	NAP1L1	Alternative 5' Splice Site
ONT.11381.9	NAP1L1	Alternative 5' Splice Site
ONT.11385.1	DNM1L	Exon skipping
ONT.11385.2	DNM1L	Exon skipping
ONT.11385.5	DNM1L	Exon skipping
ONT.11385.7	DNM1L	Exon skipping
ONT.11385.8	DNM1L	Exon skipping
ONT.11389.2	RESF1	Exon skipping
ONT.11392.1	ETFBKMT	Exon skipping
ONT.11392.3	ETFBKMT	Exon skipping
ONT.11394.1	ERGIC2	Exon skipping
ONT.11394.2	ERGIC2	Exon skipping
ONT.11394.3	ERGIC2	Exon skipping
ONT.11394.5	ERGIC2	Exon skipping
ONT.11394.6	ERGIC2	Exon skipping
ONT.11394.6	ERGIC2	Alternative 3' splice site
ONT.11394.7	ERGIC2	Exon skipping
ONT.11394.8	ERGIC2	Exon skipping
ONT.11398.4	MRPS35	Exon skipping
ONT.11401.1	MED21	Exon skipping
ONT.11401.10	MED21	Exon skipping
ONT.11401.2	MED21	Exon skipping
ONT.11401.5	MED21	Alternative 3' splice site
ONT.11401.5	MED21	Mutually exclusive exon
ONT.11401.6	MED21	Exon skipping
ONT.11401.7	MED21	Alternative 3' splice site
ONT.11401.7	MED21	Mutually exclusive exon
ONT.11401.8	MED21	Exon skipping
ONT.11401.8	MED21	Alternative 3' splice site
ONT.11403.4	FGFR1OP2	Alternative 5' Splice Site
ONT.11414.4	ETFRF1	Intron retention
ONT.1142.5	TXN	Alternative 3' splice site
ONT.11430.3	LDHB	Alternative 3' splice site
ONT.11440.3	MGST1	Exon skipping
ONT.11441.11	STRAP	Exon skipping
ONT.11445.3	MGP	Alternative 5' Splice Site
ONT.11448.1	--	Alternative 5' Splice Site
ONT.11448.5	--	Alternative 5' Splice Site
ONT.11473.1	YBX3	Alternative 5' Splice Site
ONT.11473.1	YBX3	Alternative 3' splice site
ONT.11473.10	YBX3	Alternative 3' splice site
ONT.11473.100	YBX3	Alternative 5' Splice Site
ONT.11473.100	YBX3	Alternative 3' splice site
ONT.11473.103	YBX3	Exon skipping
ONT.11473.103	YBX3	Alternative 5' Splice Site
ONT.11473.103	YBX3	Alternative 3' splice site
ONT.11473.106	YBX3	Exon skipping
ONT.11473.106	YBX3	Intron retention
ONT.11473.108	YBX3	Exon skipping
ONT.11473.109	YBX3	Exon skipping
ONT.11473.109	YBX3	Intron retention
ONT.11473.11	YBX3	Alternative 3' splice site
ONT.11473.110	YBX3	Exon skipping
ONT.11473.110	YBX3	Alternative 5' Splice Site
ONT.11473.114	YBX3	Exon skipping
ONT.11473.114	YBX3	Alternative 5' Splice Site
ONT.11473.114	YBX3	Alternative 3' splice site
ONT.11473.119	YBX3	Exon skipping
ONT.11473.119	YBX3	Alternative 5' Splice Site
ONT.11473.119	YBX3	Alternative 3' splice site
ONT.11473.12	YBX3	Exon skipping
ONT.11473.12	YBX3	Alternative 5' Splice Site
ONT.11473.12	YBX3	Alternative 3' splice site
ONT.11473.120	YBX3	Exon skipping
ONT.11473.120	YBX3	Intron retention
ONT.11473.123	YBX3	Exon skipping
ONT.11473.123	YBX3	Alternative 5' Splice Site
ONT.11473.123	YBX3	Alternative 3' splice site
ONT.11473.124	YBX3	Exon skipping
ONT.11473.124	YBX3	Intron retention
ONT.11473.125	YBX3	Exon skipping
ONT.11473.125	YBX3	Alternative 5' Splice Site
ONT.11473.125	YBX3	Alternative 3' splice site
ONT.11473.127	YBX3	Alternative 5' Splice Site
ONT.11473.127	YBX3	Alternative 3' splice site
ONT.11473.128	YBX3	Exon skipping
ONT.11473.128	YBX3	Alternative 5' Splice Site
ONT.11473.128	YBX3	Alternative 3' splice site
ONT.11473.129	YBX3	Alternative 5' Splice Site
ONT.11473.129	YBX3	Alternative 3' splice site
ONT.11473.131	YBX3	Alternative 5' Splice Site
ONT.11473.131	YBX3	Alternative 3' splice site
ONT.11473.132	YBX3	Exon skipping
ONT.11473.132	YBX3	Alternative 5' Splice Site
ONT.11473.132	YBX3	Alternative 3' splice site
ONT.11473.136	YBX3	Exon skipping
ONT.11473.136	YBX3	Alternative 5' Splice Site
ONT.11473.136	YBX3	Alternative 3' splice site
ONT.11473.139	YBX3	Alternative 5' Splice Site
ONT.11473.139	YBX3	Alternative 3' splice site
ONT.11473.140	YBX3	Exon skipping
ONT.11473.140	YBX3	Intron retention
ONT.11473.141	YBX3	Exon skipping
ONT.11473.141	YBX3	Alternative 5' Splice Site
ONT.11473.141	YBX3	Alternative 3' splice site
ONT.11473.142	YBX3	Alternative 5' Splice Site
ONT.11473.142	YBX3	Alternative 3' splice site
ONT.11473.143	YBX3	Exon skipping
ONT.11473.143	YBX3	Alternative 5' Splice Site
ONT.11473.143	YBX3	Alternative 3' splice site
ONT.11473.144	YBX3	Alternative 5' Splice Site
ONT.11473.144	YBX3	Alternative 3' splice site
ONT.11473.148	YBX3	Exon skipping
ONT.11473.148	YBX3	Alternative 5' Splice Site
ONT.11473.148	YBX3	Alternative 3' splice site
ONT.11473.150	YBX3	Exon skipping
ONT.11473.150	YBX3	Alternative 5' Splice Site
ONT.11473.150	YBX3	Alternative 3' splice site
ONT.11473.151	YBX3	Exon skipping
ONT.11473.151	YBX3	Alternative 5' Splice Site
ONT.11473.151	YBX3	Alternative 3' splice site
ONT.11473.152	YBX3	Alternative 5' Splice Site
ONT.11473.152	YBX3	Alternative 3' splice site
ONT.11473.153	YBX3	Alternative 5' Splice Site
ONT.11473.153	YBX3	Alternative 3' splice site
ONT.11473.154	YBX3	Exon skipping
ONT.11473.154	YBX3	Alternative 5' Splice Site
ONT.11473.154	YBX3	Alternative 3' splice site
ONT.11473.155	YBX3	Exon skipping
ONT.11473.155	YBX3	Alternative 5' Splice Site
ONT.11473.155	YBX3	Alternative 3' splice site
ONT.11473.156	YBX3	Alternative 5' Splice Site
ONT.11473.156	YBX3	Alternative 3' splice site
ONT.11473.159	YBX3	Exon skipping
ONT.11473.159	YBX3	Alternative 5' Splice Site
ONT.11473.159	YBX3	Alternative 3' splice site
ONT.11473.162	YBX3	Alternative 3' splice site
ONT.11473.163	YBX3	Alternative 3' splice site
ONT.11473.164	YBX3	Alternative 3' splice site
ONT.11473.165	YBX3	Alternative 3' splice site
ONT.11473.20	YBX3	Alternative 5' Splice Site
ONT.11473.20	YBX3	Exon skipping
ONT.11473.22	YBX3	Exon skipping
ONT.11473.22	YBX3	Alternative 5' Splice Site
ONT.11473.22	YBX3	Alternative 3' splice site
ONT.11473.24	YBX3	Exon skipping
ONT.11473.24	YBX3	Alternative 3' splice site
ONT.11473.3	YBX3	Alternative 5' Splice Site
ONT.11473.3	YBX3	Alternative 3' splice site
ONT.11473.31	YBX3	Exon skipping
ONT.11473.31	YBX3	Alternative 5' Splice Site
ONT.11473.31	YBX3	Alternative 3' splice site
ONT.11473.32	YBX3	Alternative 5' Splice Site
ONT.11473.32	YBX3	Alternative 3' splice site
ONT.11473.33	YBX3	Alternative 5' Splice Site
ONT.11473.33	YBX3	Alternative 3' splice site
ONT.11473.36	YBX3	Exon skipping
ONT.11473.36	YBX3	Alternative 5' Splice Site
ONT.11473.36	YBX3	Alternative 3' splice site
ONT.11473.43	YBX3	Exon skipping
ONT.11473.43	YBX3	Alternative 5' Splice Site
ONT.11473.43	YBX3	Alternative 3' splice site
ONT.11473.45	YBX3	Alternative 5' Splice Site
ONT.11473.45	YBX3	Alternative 3' splice site
ONT.11473.49	YBX3	Exon skipping
ONT.11473.49	YBX3	Alternative 5' Splice Site
ONT.11473.49	YBX3	Alternative 3' splice site
ONT.11473.5	YBX3	Exon skipping
ONT.11473.5	YBX3	Alternative 5' Splice Site
ONT.11473.5	YBX3	Alternative 3' splice site
ONT.11473.50	YBX3	Exon skipping
ONT.11473.50	YBX3	Alternative 5' Splice Site
ONT.11473.50	YBX3	Alternative 3' splice site
ONT.11473.52	YBX3	Alternative 5' Splice Site
ONT.11473.52	YBX3	Alternative 3' splice site
ONT.11473.53	YBX3	Exon skipping
ONT.11473.53	YBX3	Alternative 5' Splice Site
ONT.11473.53	YBX3	Alternative 3' splice site
ONT.11473.55	YBX3	Alternative 5' Splice Site
ONT.11473.55	YBX3	Alternative 3' splice site
ONT.11473.57	YBX3	Alternative 5' Splice Site
ONT.11473.57	YBX3	Exon skipping
ONT.11473.57	YBX3	Alternative 3' splice site
ONT.11473.58	YBX3	Exon skipping
ONT.11473.58	YBX3	Alternative 5' Splice Site
ONT.11473.58	YBX3	Alternative 3' splice site
ONT.11473.59	YBX3	Alternative 5' Splice Site
ONT.11473.59	YBX3	Exon skipping
ONT.11473.59	YBX3	Alternative 3' splice site
ONT.11473.61	YBX3	Alternative 5' Splice Site
ONT.11473.61	YBX3	Alternative 3' splice site
ONT.11473.62	YBX3	Exon skipping
ONT.11473.62	YBX3	Alternative 5' Splice Site
ONT.11473.62	YBX3	Alternative 3' splice site
ONT.11473.63	YBX3	Exon skipping
ONT.11473.63	YBX3	Alternative 5' Splice Site
ONT.11473.63	YBX3	Alternative 3' splice site
ONT.11473.65	YBX3	Alternative 5' Splice Site
ONT.11473.65	YBX3	Alternative 3' splice site
ONT.11473.66	YBX3	Exon skipping
ONT.11473.66	YBX3	Alternative 5' Splice Site
ONT.11473.66	YBX3	Alternative 3' splice site
ONT.11473.67	YBX3	Exon skipping
ONT.11473.67	YBX3	Alternative 5' Splice Site
ONT.11473.67	YBX3	Alternative 3' splice site
ONT.11473.69	YBX3	Alternative 5' Splice Site
ONT.11473.69	YBX3	Exon skipping
ONT.11473.69	YBX3	Alternative 3' splice site
ONT.11473.7	YBX3	Exon skipping
ONT.11473.70	YBX3	Exon skipping
ONT.11473.70	YBX3	Intron retention
ONT.11473.72	YBX3	Exon skipping
ONT.11473.72	YBX3	Alternative 5' Splice Site
ONT.11473.72	YBX3	Alternative 3' splice site
ONT.11473.73	YBX3	Alternative 5' Splice Site
ONT.11473.73	YBX3	Alternative 3' splice site
ONT.11473.74	YBX3	Alternative 5' Splice Site
ONT.11473.74	YBX3	Alternative 3' splice site
ONT.11473.75	YBX3	Exon skipping
ONT.11473.75	YBX3	Alternative 5' Splice Site
ONT.11473.75	YBX3	Alternative 3' splice site
ONT.11473.76	YBX3	Exon skipping
ONT.11473.76	YBX3	Alternative 5' Splice Site
ONT.11473.76	YBX3	Alternative 3' splice site
ONT.11473.77	YBX3	Exon skipping
ONT.11473.77	YBX3	Alternative 5' Splice Site
ONT.11473.77	YBX3	Alternative 3' splice site
ONT.11473.78	YBX3	Exon skipping
ONT.11473.78	YBX3	Alternative 5' Splice Site
ONT.11473.78	YBX3	Alternative 3' splice site
ONT.11473.8	YBX3	Alternative 5' Splice Site
ONT.11473.8	YBX3	Alternative 3' splice site
ONT.11473.85	YBX3	Exon skipping
ONT.11473.85	YBX3	Alternative 5' Splice Site
ONT.11473.85	YBX3	Alternative 3' splice site
ONT.11473.87	YBX3	Exon skipping
ONT.11473.87	YBX3	Alternative 5' Splice Site
ONT.11473.87	YBX3	Alternative 3' splice site
ONT.11473.88	YBX3	Exon skipping
ONT.11473.88	YBX3	Alternative 5' Splice Site
ONT.11473.88	YBX3	Alternative 3' splice site
ONT.11473.89	YBX3	Exon skipping
ONT.11473.89	YBX3	Alternative 5' Splice Site
ONT.11473.89	YBX3	Alternative 3' splice site
ONT.11473.90	YBX3	Exon skipping
ONT.11473.90	YBX3	Alternative 5' Splice Site
ONT.11473.90	YBX3	Alternative 3' splice site
ONT.11473.91	YBX3	Exon skipping
ONT.11473.91	YBX3	Alternative 5' Splice Site
ONT.11473.91	YBX3	Alternative 3' splice site
ONT.11473.92	YBX3	Exon skipping
ONT.11473.92	YBX3	Intron retention
ONT.11473.93	YBX3	Exon skipping
ONT.11473.93	YBX3	Alternative 5' Splice Site
ONT.11473.93	YBX3	Alternative 3' splice site
ONT.11473.94	YBX3	Alternative 5' Splice Site
ONT.11473.94	YBX3	Alternative 3' splice site
ONT.11473.95	YBX3	Alternative 5' Splice Site
ONT.11473.95	YBX3	Alternative 3' splice site
ONT.11473.96	YBX3	Exon skipping
ONT.11473.96	YBX3	Alternative 5' Splice Site
ONT.11473.96	YBX3	Alternative 3' splice site
ONT.11473.98	YBX3	Exon skipping
ONT.11473.98	YBX3	Alternative 5' Splice Site
ONT.11473.98	YBX3	Alternative 3' splice site
ONT.11473.99	YBX3	Exon skipping
ONT.11473.99	YBX3	Alternative 5' Splice Site
ONT.11473.99	YBX3	Alternative 3' splice site
ONT.11474.1	YBX3	Exon skipping
ONT.11475.1	MAGOHB	Exon skipping
ONT.11475.2	MAGOHB	Exon skipping
ONT.11475.3	MAGOHB	Exon skipping
ONT.11476.2	KLRK1	Intron retention
ONT.11479.1	CLEC1A	Alternative 3' splice site
ONT.11479.4	CLEC1A	Alternative 3' splice site
ONT.11484.7	M6PR	Exon skipping
ONT.11486.13	MFAP5	Exon skipping
ONT.11486.13	MFAP5	Alternative 3' splice site
ONT.11486.13	MFAP5	Mutually exclusive exon
ONT.11486.16	MFAP5	Alternative 3' splice site
ONT.11486.2	MFAP5	Exon skipping
ONT.11486.2	MFAP5	Mutually exclusive exon
ONT.11486.5	MFAP5	Mutually exclusive exon
ONT.11486.7	MFAP5	Exon skipping
ONT.11486.7	MFAP5	Mutually exclusive exon
ONT.11486.8	MFAP5	Exon skipping
ONT.11486.8	MFAP5	Alternative 3' splice site
ONT.11489.1	NECAP1	Alternative 5' Splice Site
ONT.11492.1	CD163	Alternative 3' splice site
ONT.11492.3	CD163	Alternative 3' splice site
ONT.11492.5	CD163	Intron retention
ONT.11493.4	--	Exon skipping
ONT.11500.10	EMG1	Intron retention
ONT.11500.3	EMG1	Alternative 3' splice site
ONT.11500.6	EMG1	Intron retention
ONT.11500.8	EMG1	Intron retention
ONT.11501.1	PHB2	Exon skipping
ONT.11501.2	PHB2	Exon skipping
ONT.11501.2	PHB2	Alternative 3' splice site
ONT.11503.2	C12orf57	Alternative 5' Splice Site
ONT.11505.15	TPI1	Alternative 3' splice site
ONT.11505.7	TPI1	Intron retention
ONT.11507.5	USP5	Alternative 5' Splice Site
ONT.11508.2	P3H3	Intron retention
ONT.11512.1	COPS7A	Alternative 3' splice site
ONT.11512.10	COPS7A	Alternative 5' Splice Site
ONT.11512.10	COPS7A	Intron retention
ONT.11512.10	COPS7A	Alternative 3' splice site
ONT.11512.11	COPS7A	Intron retention
ONT.11512.12	COPS7A	Alternative 3' splice site
ONT.11512.18	COPS7A	Alternative 3' splice site
ONT.11512.20	COPS7A	Alternative 3' splice site
ONT.11512.22	COPS7A	Alternative 3' splice site
ONT.11512.24	COPS7A	Alternative 3' splice site
ONT.11512.27	COPS7A	Alternative 3' splice site
ONT.11512.3	COPS7A	Alternative 3' splice site
ONT.11512.31	COPS7A	Alternative 5' Splice Site
ONT.11512.31	COPS7A	Alternative 3' splice site
ONT.11512.32	COPS7A	Alternative 3' splice site
ONT.11512.4	COPS7A	Alternative 5' Splice Site
ONT.11512.4	COPS7A	Alternative 3' splice site
ONT.11512.5	COPS7A	Alternative 5' Splice Site
ONT.11512.5	COPS7A	Alternative 3' splice site
ONT.11512.9	COPS7A	Intron retention
ONT.11512.9	COPS7A	Alternative 3' splice site
ONT.11515.1	ACRBP	Intron retention
ONT.11515.10	ACRBP	Alternative 3' splice site
ONT.11515.17	ACRBP	Intron retention
ONT.11515.17	ACRBP	Alternative 3' splice site
ONT.11515.19	ACRBP	Mutually exclusive exon
ONT.11515.2	ACRBP	Alternative 5' Splice Site
ONT.11515.20	ACRBP	Alternative 5' Splice Site
ONT.11515.3	ACRBP	Alternative 3' splice site
ONT.11515.5	ACRBP	Intron retention
ONT.11515.6	ACRBP	Alternative 5' Splice Site
ONT.11515.7	ACRBP	Alternative 5' Splice Site
ONT.11515.8	ACRBP	Alternative 3' splice site
ONT.11515.8	ACRBP	Mutually exclusive exon
ONT.11527.3	LTBR	Alternative 3' splice site
ONT.11529.2	CD9	Exon skipping
ONT.11532.10	VWF	Alternative 3' splice site
ONT.11532.14	VWF	Alternative 3' splice site
ONT.11535.3	AKAP3	Alternative 5' Splice Site
ONT.11548.4	TEAD4	Exon skipping
ONT.11554.11	FKBP4	Alternative 5' Splice Site
ONT.11554.11	FKBP4	Alternative 3' splice site
ONT.11554.13	FKBP4	Alternative 5' Splice Site
ONT.11554.13	FKBP4	Alternative 3' splice site
ONT.11554.14	FKBP4	Alternative 5' Splice Site
ONT.11554.14	FKBP4	Intron retention
ONT.11554.15	FKBP4	Alternative 5' Splice Site
ONT.11554.15	FKBP4	Intron retention
ONT.11554.2	FKBP4	Alternative 3' splice site
ONT.11554.24	FKBP4	Alternative 5' Splice Site
ONT.11554.24	FKBP4	Alternative 3' splice site
ONT.11554.25	FKBP4	Alternative 5' Splice Site
ONT.11554.25	FKBP4	Alternative 3' splice site
ONT.11554.26	FKBP4	Alternative 5' Splice Site
ONT.11554.27	FKBP4	Alternative 5' Splice Site
ONT.11554.5	FKBP4	Alternative 5' Splice Site
ONT.11554.5	FKBP4	Intron retention
ONT.11581.3	ATP6V1E1	Alternative 5' Splice Site
ONT.11587.12	TUBA8	Alternative 5' Splice Site
ONT.11587.3	TUBA8	Alternative 5' Splice Site
ONT.11595.2	ZCRB1	Alternative 3' splice site
ONT.11596.4	PPHLN1	Exon skipping
ONT.11615.1	--	Alternative 5' Splice Site
ONT.11615.3	--	Alternative 3' splice site
ONT.11615.4	--	Alternative 5' Splice Site
ONT.1162.1	INIP	Alternative 3' splice site
ONT.11622.1	TMEM106C	Alternative 3' splice site
ONT.11625.1	PFKM	Alternative 5' Splice Site
ONT.11625.1	PFKM	Alternative 3' splice site
ONT.11625.10	PFKM	Alternative 5' Splice Site
ONT.11625.10	PFKM	Alternative 3' splice site
ONT.11625.13	PFKM	Alternative 3' splice site
ONT.11625.15	PFKM	Alternative 5' Splice Site
ONT.11625.15	PFKM	Alternative 3' splice site
ONT.11625.16	PFKM	Intron retention
ONT.11625.16	PFKM	Alternative 5' Splice Site
ONT.11625.16	PFKM	Alternative 3' splice site
ONT.11625.17	PFKM	Alternative 5' Splice Site
ONT.11625.17	PFKM	Alternative 3' splice site
ONT.11625.18	PFKM	Alternative 5' Splice Site
ONT.11625.20	PFKM	Intron retention
ONT.11625.20	PFKM	Alternative 5' Splice Site
ONT.11625.20	PFKM	Alternative 3' splice site
ONT.11625.22	PFKM	Alternative 5' Splice Site
ONT.11625.22	PFKM	Alternative 3' splice site
ONT.11625.23	PFKM	Intron retention
ONT.11625.23	PFKM	Alternative 5' Splice Site
ONT.11625.27	PFKM	Alternative 5' Splice Site
ONT.11625.30	PFKM	Alternative 5' Splice Site
ONT.11625.30	PFKM	Alternative 3' splice site
ONT.11625.36	PFKM	Alternative 5' Splice Site
ONT.11625.36	PFKM	Alternative 3' splice site
ONT.11625.37	PFKM	Alternative 5' Splice Site
ONT.11625.37	PFKM	Alternative 3' splice site
ONT.11625.39	PFKM	Alternative 5' Splice Site
ONT.11625.39	PFKM	Alternative 3' splice site
ONT.11625.4	PFKM	Alternative 5' Splice Site
ONT.11625.4	PFKM	Alternative 3' splice site
ONT.11625.41	PFKM	Alternative 5' Splice Site
ONT.11625.41	PFKM	Alternative 3' splice site
ONT.11625.44	PFKM	Alternative 5' Splice Site
ONT.11625.45	PFKM	Alternative 5' Splice Site
ONT.11625.47	PFKM	Alternative 5' Splice Site
ONT.11628.3	ASB8	Exon skipping
ONT.11628.8	ASB8	Alternative 3' splice site
ONT.11628.9	ASB8	Alternative 3' splice site
ONT.11630.1	KANSL2	Exon skipping
ONT.11630.1	KANSL2	Alternative 5' Splice Site
ONT.11630.3	KANSL2	Exon skipping
ONT.11630.6	KANSL2	Exon skipping
ONT.11630.9	KANSL2	Exon skipping
ONT.11634.1	C12orf45	Exon skipping
ONT.11634.3	C12orf45	Exon skipping
ONT.11634.4	C12orf45	Exon skipping
ONT.11636.1	NFYB	Alternative 5' Splice Site
ONT.11636.12	NFYB	Alternative 5' Splice Site
ONT.11636.2	NFYB	Alternative 5' Splice Site
ONT.11636.4	NFYB	Alternative 5' Splice Site
ONT.11642.11	C12orf73	Alternative 5' Splice Site
ONT.11642.13	C12orf73	Alternative 5' Splice Site
[truncated: 12,730 more rows]
