# Supplementary material for: Integrative Analysis of Nanopore and Illumina Sequencing Reveals Alternative Splicing Complexity in Pig Longissimus Dorsi Muscle
Source: Front Genet. 2022 Apr 11;13:877646. doi: 10.3389/fgene.2022.877646 (PMC9035893; doi:10.3389/fgene.2022.877646)
Supplement: Supplementary file 8 [file Table1.XLSX]

## Sheet: Supplementary Table S1
Supplementary Table S1 Overview of RNA-seq
SampleID	Number of reads	Overall alignment rate
H02	22932366	0.9581
H10	61936056	0.9687
H12	21916746	0.9535
H14	22537560	0.9603
H16	67581740	0.9636
H17	92217982	0.9717
H18	67875776	0.9671
H21	22230492	0.9552
H22	22500646	0.9594
H24	20932862	0.9589
H25	19877520	0.9546
H26	20625220	0.9494
H27	73578994	0.9715
H28	19986988	0.9485
H29	21327666	0.9476
L04	93872477	0.9677
L06	19242816	0.9505
L09	79008128	0.9648
L14	86190305	0.9672
L16	20829885	0.957
L19	20649598	0.9543
L21	21591925	0.9411
L22	20134642	0.9419
L23	22680722	0.9544
L24	18779765	0.9455
L25	78054673	0.9698
L26	21176551	0.9493
L27	21657025	0.9561
L28	79255191	0.9721
L31	21225485	0.9537
