# Supplementary material for: Integrative Analysis of Nanopore and Illumina Sequencing Reveals Alternative Splicing Complexity in Pig Longissimus Dorsi Muscle
Source: Front Genet. 2022 Apr 11;13:877646. doi: 10.3389/fgene.2022.877646 (PMC9035893; doi:10.3389/fgene.2022.877646)
Supplement: Supplementary file 9 [file Table10.XLSX]

## Sheet: Supplementary Table S10
Supplementary Table S10 Hub splicing isoforms of module black
NodeName	ModuleName
ONT.6603.3	black
ONT.9322.51	black
ONT.6131.1	black
ONT.5591.3	black
ONT.8888.7	black
ONT.7448.22	black
ONT.15984.5	black
ONT.1244.5	black
ONT.8117.9	black
ONT.5883.18	black
ONT.7094.6	black
ONT.4770.1	black
ONT.5365.83	black
ONT.15722.1	black
ONT.15079.18	black
ONT.2674.11	black
ONT.13691.1	black
ONT.2762.5	black
ONT.15612.9	black
ONT.15612.8	black
ONT.3985.9	black
ONT.13247.4	black
ONT.3985.11	black
ONT.10638.13	black
ONT.10638.14	black
ONT.5457.5	black
ONT.15779.2	black
ONT.9084.67	black
ONT.8386.11	black
ONT.7448.34	black
ONT.3669.13	black
ONT.5768.2	black
ONT.13239.3	black
ONT.813.3	black
ONT.5883.19	black
ONT.13121.3	black
ONT.5365.82	black
ONT.11307.12	black
ONT.12897.1	black
ONT.7429.12	black
ONT.7429.11	black
