# Supplementary material for: Integrative Analysis of Nanopore and Illumina Sequencing Reveals Alternative Splicing Complexity in Pig Longissimus Dorsi Muscle
Source: Front Genet. 2022 Apr 11;13:877646. doi: 10.3389/fgene.2022.877646 (PMC9035893; doi:10.3389/fgene.2022.877646)
Supplement: Supplementary file 10 [file Table12.XLSX]

## Sheet: Supplementary Table S12
Supplementary Table S12 Primers for validation of AS events
GeneID	Primers (5`-3`)
ONT.6732	TCTGAACGGAGGCATCACC
	GCTTCTGCTCCACTCTTTATTTT
ONT.15020	AACCAGGTCATCAAGTGC
	CAAGTAAATCTGCTAGTGCC
ONT.1066	TGCATGAGGCGAGTGAGA
	AATCGGCGACAGGTGGT
ONT.9799	CCTCACCTGGCTCATTTGG
	TATCGCCTACCCCTGGATC
ONT.8241	ACCGTAGAGGTTGTCTGAAGGC
	GCTGGAGGCAGAGCAAGGAT
ONT.9654	CATGAATCGAAAAGGTGG
	AATGGGGTTGATGACTGC
