# Supplementary material for: Integrative Analysis of Nanopore and Illumina Sequencing Reveals Alternative Splicing Complexity in Pig Longissimus Dorsi Muscle
Source: Front Genet. 2022 Apr 11;13:877646. doi: 10.3389/fgene.2022.877646 (PMC9035893; doi:10.3389/fgene.2022.877646)
Supplement: Supplementary file 11 [file Table5.XLSX]

## Sheet: Supplementary Table S5-1
Supplementary Table S5-1 GO analysis of splicing isoforms occurring only in group H
Ontology	ID	Description	GeneRatio	BgRatio	Pvalue	Padjust	Qvalue	GeneID	Count
BP	GO:0022613	ribonucleoprotein complex biogenesis	34/420	157/6187	7.23e-10	1.9e-06	1.83e-06	SNRPD3/LTO1/DENR/RPL6/SF3B1/GEMIN2/STRAP/PIH1D1/SNRPC/DHX30/EIF3M/NHP2/BUD23/RPL7/TARBP2/PTGES3/FBL/MRPL20/MRTO4/LSM6/SNRPE/DDX3X/UTP14A/USP4/RPS27L/RSL24D1/EIF3J/MTREX/RPS21/MRPL11/PRPF19/WDR55/GEMIN6/RPS7	34
BP	GO:0022618	ribonucleoprotein complex assembly	22/420	78/6187	4.71e-09	6.19e-06	5.96e-06	SNRPD3/DENR/RPL6/SF3B1/GEMIN2/STRAP/PIH1D1/SNRPC/DHX30/EIF3M/TARBP2/PTGES3/MRPL20/MRTO4/SNRPE/USP4/RPS27L/RSL24D1/EIF3J/MRPL11/PRPF19/GEMIN6	22
BP	GO:0071826	ribonucleoprotein complex subunit organization	22/420	81/6187	1.02e-08	7.99e-06	7.69e-06	SNRPD3/DENR/RPL6/SF3B1/GEMIN2/STRAP/PIH1D1/SNRPC/DHX30/EIF3M/TARBP2/PTGES3/MRPL20/MRTO4/SNRPE/USP4/RPS27L/RSL24D1/EIF3J/MRPL11/PRPF19/GEMIN6	22
BP	GO:0006396	RNA processing	49/420	310/6187	1.21e-08	7.99e-06	7.69e-06	SNRPD3/SF3B1/GEMIN2/CLK4/AHCYL1/STRAP/PIH1D1/URM1/SNRPC/RBM25/RBM3/RPP38/LSM1/SSB/SF3B2/HNRNPM/HNRNPH1/NHP2/BUD31/BUD23/SRSF7/RPL7/RBM8A/BCAS2/TARBP2/FBL/PUSL1/RPP21/SRSF5/LSM6/SNRPE/UTP14A/ELP5/USP4/THOC7/CCNL1/MTREX/RBM39/RPS21/LSM8/HNRNPA2B1/TBRG4/PRPF19/UBL5/PTBP1/WDR55/TPRKB/GEMIN6/RPS7	49
BP	GO:0043604	amide biosynthetic process	46/420	291/6187	3.54e-08	1.86e-05	1.79e-05	RPL9/LTO1/MRPS18B/DENR/RPL6/MTG1/EEF1B2/RPS20/MPC2/ZFP36/TRNAU1AP/PDHA1/RBM3/RPL22L1/NPM1/EIF3M/MRPS21/TARBP2/RPL13/MRPL20/RPL22/FH/RPS3/NARS2/ACAT1/DDX3X/RPL21/FXR1/EIF4A2/RPS27L/RPS24/RSL24D1/EIF3J/ASNSD1/ACSS2/RPS21/MRPL11/MRPL16/RPLP1/CALR/RPS29/RPS23/PTBP1/MRPS5/PUM3/RPS7	46
BP	GO:0006412	translation	40/420	239/6187	5.98e-08	2.62e-05	2.53e-05	RPL9/LTO1/MRPS18B/DENR/RPL6/MTG1/EEF1B2/RPS20/ZFP36/TRNAU1AP/RBM3/RPL22L1/NPM1/EIF3M/MRPS21/TARBP2/RPL13/MRPL20/RPL22/RPS3/NARS2/DDX3X/RPL21/FXR1/EIF4A2/RPS27L/RPS24/RSL24D1/EIF3J/RPS21/MRPL11/MRPL16/RPLP1/CALR/RPS29/RPS23/PTBP1/MRPS5/PUM3/RPS7	40
BP	GO:0043043	peptide biosynthetic process	40/420	245/6187	1.21e-07	4.53e-05	4.36e-05	RPL9/LTO1/MRPS18B/DENR/RPL6/MTG1/EEF1B2/RPS20/ZFP36/TRNAU1AP/RBM3/RPL22L1/NPM1/EIF3M/MRPS21/TARBP2/RPL13/MRPL20/RPL22/RPS3/NARS2/DDX3X/RPL21/FXR1/EIF4A2/RPS27L/RPS24/RSL24D1/EIF3J/RPS21/MRPL11/MRPL16/RPLP1/CALR/RPS29/RPS23/PTBP1/MRPS5/PUM3/RPS7	40
BP	GO:0006397	mRNA processing	28/420	147/6187	4.3e-07	0.000141383	0.000136153	SNRPD3/SF3B1/GEMIN2/AHCYL1/STRAP/SNRPC/RBM25/RBM3/LSM1/SF3B2/HNRNPM/BUD31/SRSF7/RBM8A/BCAS2/SRSF5/LSM6/SNRPE/USP4/THOC7/RBM39/LSM8/HNRNPA2B1/TBRG4/PRPF19/UBL5/PTBP1/GEMIN6	28
BP	GO:0006518	peptide metabolic process	43/420	292/6187	7.81e-07	0.000225262	0.00021693	RPL9/LTO1/MRPS18B/DENR/RPL6/MTG1/EEF1B2/RPS20/ZFP36/TRNAU1AP/RBM3/RPL22L1/NPM1/EIF3M/MRPS21/TARBP2/MGST1/RPL13/MRPL20/RPL22/RPS3/NARS2/DDX3X/RPL21/FXR1/EIF4A2/RPS27L/RPS24/RSL24D1/EIF3J/RPS21/GSTK1/MRPL11/MRPL16/RPLP1/CALR/RPS29/RPS23/PTBP1/MRPS5/PUM3/CHAC2/RPS7	43
BP	GO:0043603	cellular amide metabolic process	51/420	375/6187	8.56e-07	0.000225262	0.00021693	RPL9/LTO1/MRPS18B/DENR/RPL6/MTG1/EEF1B2/RPS20/MPC2/ZFP36/TRNAU1AP/PDHA1/RBM3/RPL22L1/NPM1/EIF3M/SUCLG1/MRPS21/TARBP2/MGST1/RPL13/MRPL20/RPL22/FH/RPS3/NARS2/ACAT1/DDX3X/RPL21/FXR1/EIF4A2/RPS27L/RPS24/RSL24D1/EIF3J/ASNSD1/PLPP1/ACSS2/RPS21/GSTK1/MRPL11/MRPL16/RPLP1/CALR/RPS29/RPS23/PTBP1/MRPS5/PUM3/CHAC2/RPS7	51
BP	GO:0051603	proteolysis involved in cellular protein catabolic process	36/420	229/6187	1.37e-06	0.000287736	0.000277093	FBXO6/UBE2D3/PSMC2/PSMA1/FAF2/PSMB7/PSME1/PSMD3/CTNNB1/ARIH2/UBC/DDRGK1/DNAJB9/PSMA2/DDIT3/ATP5IF1/PSMA4/UBL7/PSME2/RNF4/UCHL1/CTSV/SNF8/USP4/CRBN/RNF13/UBE2D1/PSMD14/NSFL1C/PSMA7/PRPF19/RAD23A/PSMC6/PSMA3/NTAN1/RPS7	36
BP	GO:0044265	cellular macromolecule catabolic process	46/420	329/6187	1.42e-06	0.000287736	0.000277093	FBXO6/UBE2D3/PSMC2/PSMA1/FAF2/ZFP36/PSMB7/PSME1/DNASE1L1/PSMD3/CTNNB1/ARIH2/UBC/LSM1/SSB/NPM1/DDRGK1/DNAJB9/PSMA2/RBM8A/DDIT3/ATP5IF1/PSMA4/UBL7/PSME2/RNF4/UCHL1/CTSV/SNF8/USP4/CRBN/RNF13/ANXA2/UBE2D1/PSMD14/MTREX/NSFL1C/PSMA7/TBRG4/PRPF19/RAD23A/PSMC6/PSMA3/NTAN1/RPS7/RNASEH1	46
BP	GO:0044257	cellular protein catabolic process	37/420	239/6187	1.42e-06	0.000287736	0.000277093	FBXO6/UBE2D3/PSMC2/PSMA1/FAF2/PSMB7/PSME1/PSMD3/CTNNB1/ARIH2/UBC/DDRGK1/DNAJB9/PSMA2/DDIT3/ATP5IF1/PSMA4/UBL7/PSME2/RNF4/UCHL1/CTSV/SNF8/USP4/CRBN/RNF13/ANXA2/UBE2D1/PSMD14/NSFL1C/PSMA7/PRPF19/RAD23A/PSMC6/PSMA3/NTAN1/RPS7	37
BP	GO:0034622	cellular protein-containing complex assembly	46/420	331/6187	1.69e-06	0.000316993	0.000305268	SNRPD3/TMOD4/NAP1L1/PSMC2/DENR/RPL6/SF3B1/GEMIN2/STRAP/COPS7A/PIH1D1/PSMG2/SNRPC/DHX30/BRK1/NPM1/NAP1L4/EIF3M/TERF1/CASQ1/TARBP2/PTGES3/DMAC2/MRPL20/MRTO4/RNF4/H3F3A/RDX/ESAM/SNRPE/CD36/CLTC/RANGRF/USP4/RPS27L/TOMM20/GTF2A2/RSL24D1/EIF3J/NDUFAF5/CAPZA2/MRPL11/PRPF19/CALR/NDUFAB1/GEMIN6	46
BP	GO:0000375	RNA splicing via transesterification reactions	22/420	109/6187	2.81e-06	0.000419202	0.000403696	SNRPD3/SF3B1/GEMIN2/STRAP/SNRPC/RBM25/RBM3/SF3B2/HNRNPM/BUD31/SRSF7/RBM8A/BCAS2/SRSF5/LSM6/SNRPE/USP4/LSM8/PRPF19/UBL5/PTBP1/GEMIN6	22
BP	GO:0000377	RNA splicing via transesterification reactions with bulged adenosine as nucleophile	22/420	109/6187	2.81e-06	0.000419202	0.000403696	SNRPD3/SF3B1/GEMIN2/STRAP/SNRPC/RBM25/RBM3/SF3B2/HNRNPM/BUD31/SRSF7/RBM8A/BCAS2/SRSF5/LSM6/SNRPE/USP4/LSM8/PRPF19/UBL5/PTBP1/GEMIN6	22
BP	GO:0000398	mRNA splicing via spliceosome	22/420	109/6187	2.81e-06	0.000419202	0.000403696	SNRPD3/SF3B1/GEMIN2/STRAP/SNRPC/RBM25/RBM3/SF3B2/HNRNPM/BUD31/SRSF7/RBM8A/BCAS2/SRSF5/LSM6/SNRPE/USP4/LSM8/PRPF19/UBL5/PTBP1/GEMIN6	22
BP	GO:0055001	muscle cell development	15/420	56/6187	2.87e-06	0.000419202	0.000403696	TNNT3/TNNT1/TMOD4/MYOZ2/KLHL40/CAV3/CASQ1/MYF6/UCHL1/MYOG/ATP2A2/MYL2/KLHL41/CFLAR/CSRP3	15
BP	GO:0055002	striated muscle cell development	14/420	53/6187	7.37e-06	0.00102083	0.000983068	TNNT3/TNNT1/TMOD4/MYOZ2/KLHL40/CAV3/CASQ1/MYF6/UCHL1/MYOG/MYL2/KLHL41/CFLAR/CSRP3	14
BP	GO:0030239	myofibril assembly	10/420	28/6187	8.08e-06	0.00106251	0.00102321	TNNT3/TNNT1/TMOD4/MYOZ2/CAV3/CASQ1/MYL2/KLHL41/CFLAR/CSRP3	10
BP	GO:0008380	RNA splicing	24/420	134/6187	8.93e-06	0.00111867	0.00107729	SNRPD3/SF3B1/GEMIN2/CLK4/STRAP/SNRPC/RBM25/RBM3/SF3B2/HNRNPM/HNRNPH1/BUD31/SRSF7/RBM8A/BCAS2/SRSF5/LSM6/SNRPE/USP4/LSM8/PRPF19/UBL5/PTBP1/GEMIN6	24
BP	GO:0016071	mRNA metabolic process	32/420	212/6187	1.29e-05	0.00154236	0.00148531	SNRPD3/SF3B1/GEMIN2/AHCYL1/STRAP/ZFP36/SNRPC/RBM25/RBM3/LSM1/SSB/NPM1/SF3B2/HNRNPM/BUD31/SRSF7/RBM8A/BCAS2/DDIT3/SRSF5/LSM6/SNRPE/USP4/THOC7/RBM39/LSM8/HNRNPA2B1/TBRG4/PRPF19/UBL5/PTBP1/GEMIN6	32
BP	GO:0006099	tricarboxylic acid cycle	7/420	14/6187	1.43e-05	0.00163412	0.00157367	ACO2/SDHD/IDH3G/SUCLG1/SDHC/FH/IDH3B	7
BP	GO:0000387	spliceosomal snRNP assembly	8/420	19/6187	1.64e-05	0.00179659	0.00173013	SNRPD3/GEMIN2/STRAP/SNRPC/SNRPE/USP4/PRPF19/GEMIN6	8
BP	GO:0019941	modification-dependent protein catabolic process	30/420	199/6187	2.48e-05	0.00261059	0.00251403	FBXO6/UBE2D3/PSMC2/PSMA1/FAF2/PSMB7/PSMD3/CTNNB1/ARIH2/UBC/DDRGK1/DNAJB9/PSMA2/DDIT3/PSMA4/UBL7/RNF4/UCHL1/SNF8/USP4/CRBN/RNF13/UBE2D1/NSFL1C/PSMA7/RAD23A/PSMC6/PSMA3/NTAN1/RPS7	30
BP	GO:0042254	ribosome biogenesis	20/420	107/6187	2.64e-05	0.00267072	0.00257193	LTO1/RPL6/PIH1D1/DHX30/NHP2/BUD23/RPL7/FBL/MRPL20/MRTO4/LSM6/DDX3X/UTP14A/RPS27L/RSL24D1/MTREX/RPS21/MRPL11/WDR55/RPS7	20
BP	GO:0042692	muscle cell differentiation	21/420	116/6187	2.76e-05	0.00268522	0.0025859	TNNT3/TNNT1/TMOD4/MYOZ2/CTNNB1/KLHL40/CAV3/CASQ1/TARBP2/MYF6/UCHL1/H3F3A/MYOG/IFT20/ATP2A2/MYL2/KLHL41/CFLAR/IGF2/CSRP3/PTBP1	21
BP	GO:0043632	modification-dependent macromolecule catabolic process	30/420	201/6187	3.02e-05	0.00283691	0.00273198	FBXO6/UBE2D3/PSMC2/PSMA1/FAF2/PSMB7/PSMD3/CTNNB1/ARIH2/UBC/DDRGK1/DNAJB9/PSMA2/DDIT3/PSMA4/UBL7/RNF4/UCHL1/SNF8/USP4/CRBN/RNF13/UBE2D1/NSFL1C/PSMA7/RAD23A/PSMC6/PSMA3/NTAN1/RPS7	30
BP	GO:0065003	protein-containing complex assembly	53/420	447/6187	3.18e-05	0.00288287	0.00277624	SNRPD3/TMOD4/NAP1L1/PSMC2/DENR/RPL6/B2M/SF3B1/GEMIN2/STRAP/COPS7A/PIH1D1/PSMG2/SNRPC/DHX30/BRK1/NPM1/NAP1L4/EIF3M/TERF1/CASQ1/CCT3/TARBP2/PTGES3/PFKM/DMAC2/MRPL20/MRTO4/RNF4/H3F3A/RDX/ESAM/SNRPE/CD36/DDX3X/CLTC/RANGRF/USP4/RPS27L/TOMM20/ANXA2/GTF2A2/RSL24D1/EIF3J/NDUFAF5/CAPZA2/MRPL11/PRPF19/CALR/SAR1B/CD74/NDUFAB1/GEMIN6	53
BP	GO:0006511	ubiquitin-dependent protein catabolic process	29/420	195/6187	4.39e-05	0.00385089	0.00370845	FBXO6/UBE2D3/PSMC2/PSMA1/FAF2/PSMB7/PSMD3/CTNNB1/ARIH2/DDRGK1/DNAJB9/PSMA2/DDIT3/PSMA4/UBL7/RNF4/UCHL1/SNF8/USP4/CRBN/RNF13/UBE2D1/NSFL1C/PSMA7/RAD23A/PSMC6/PSMA3/NTAN1/RPS7	29
BP	GO:0010927	cellular component assembly involved in morphogenesis	11/420	40/6187	4.73e-05	0.00401646	0.0038679	TNNT3/TNNT1/TMOD4/MYOZ2/CAV3/CASQ1/ACRBP/MYL2/KLHL41/CFLAR/CSRP3	11
BP	GO:0030163	protein catabolic process	38/420	291/6187	5.88e-05	0.00477741	0.0046007	FBXO6/UBE2D3/PSMC2/PSMA1/FAF2/PSMB7/PSME1/PSMC1/PSMD3/CTNNB1/ARIH2/UBC/DDRGK1/DNAJB9/PSMA2/DDIT3/ATP5IF1/PSMA4/UBL7/PSME2/RNF4/UCHL1/CTSV/SNF8/USP4/CRBN/RNF13/ANXA2/UBE2D1/PSMD14/NSFL1C/PSMA7/PRPF19/RAD23A/PSMC6/PSMA3/NTAN1/RPS7	38
BP	GO:0006508	proteolysis	49/420	412/6187	5.99e-05	0.00477741	0.0046007	COPS4/PSENEN/FBXO6/UBE2D3/PSMC2/PSMA1/FAF2/PSMB7/PIH1D1/PSME1/PSMD3/CTNNB1/ARIH2/UBC/DDRGK1/DNAJB9/PSMA2/ENY2/COPS5/DDIT3/CAPNS1/ATP5IF1/PSMA4/UBL7/PSME2/RNF4/UCHL1/CTSV/DDX3X/BRCC3/SNF8/USP4/CRBN/RNF13/ANXA2/UBE2D1/COPS2/PSMD14/STAT1/CFLAR/NSFL1C/PSMA7/PRPF19/IMMP1L/RAD23A/PSMC6/PSMA3/NTAN1/RPS7	49
BP	GO:0009057	macromolecule catabolic process	47/420	391/6187	6.57e-05	0.00508425	0.0048962	FBXO6/UBE2D3/PSMC2/PSMA1/FAF2/ZFP36/PSMB7/PSME1/PSMC1/DNASE1L1/PSMD3/CTNNB1/ARIH2/UBC/LSM1/SSB/NPM1/DDRGK1/DNAJB9/PSMA2/RBM8A/DDIT3/ATP5IF1/PSMA4/UBL7/PSME2/RNF4/UCHL1/CTSV/SNF8/USP4/CRBN/RNF13/ANXA2/UBE2D1/PSMD14/MTREX/NSFL1C/PSMA7/TBRG4/PRPF19/RAD23A/PSMC6/PSMA3/NTAN1/RPS7/RNASEH1	47
BP	GO:0070925	organelle assembly	33/420	243/6187	8.49e-05	0.00637983	0.00614386	TNNT3/TNNT1/TMOD4/RPL6/MYOZ2/CETN2/DHX30/CAV3/NPM1/VDAC3/CDKN3/DYNC2LI1/CASQ1/ACRBP/MRPL20/MRTO4/PRKAA2/RNF4/DDX3X/WDR45/CHMP5/IFT20/CEP19/MYL2/RPS27L/RSL24D1/KLHL41/CFLAR/NSFL1C/MRPL11/BSCL2/RAB11A/CSRP3	33
BP	GO:0061061	muscle structure development	27/420	184/6187	0.00010188	0.00744573	0.00717033	TNNT3/TNNT1/PDLIM3/TMOD4/YBX3/MYOZ2/CTNNB1/KLHL40/CAV3/CASQ1/TARBP2/DDIT3/MYF6/UCHL1/H3F3A/MYOG/FHL1/IFT20/ATP2A2/MYL2/COPS2/KLHL41/CFLAR/IGF2/CSRP3/NMRK2/PTBP1	27
BP	GO:0006941	striated muscle contraction	11/420	45/6187	0.000152494	0.0108436	0.0104425	TNNT3/TNNT1/CAV3/TPM1/TNNI2/CASQ1/TMEM38B/RANGRF/ATP2A2/MYL2/CSRP3	11
BP	GO:0034394	protein localization to cell surface	6/420	14/6187	0.000177453	0.0122863	0.0118318	CTNNB1/TYROBP/PIGK/RANGRF/USP4/PIGU	6
BP	GO:0055114	oxidation-reduction process	25/420	172/6187	0.000213971	0.0144348	0.0139009	ACO2/PRXL2B/SDHD/NDUFA7/HADHA/IDH3G/HMOX2/SUCLG1/SDHC/PTGES3/MGST1/PFKM/ETFB/FH/ADH5/ACAT1/SLC37A4/NDUFB6/ACADVL/MRPS36/IDH3B/NDUFA5/CYB5A/NDUFV1/PLIN5	25
BP	GO:0002181	cytoplasmic translation	11/420	47/6187	0.000231249	0.0152104	0.0146478	RPL9/DENR/RPL6/EIF3M/RPL22/EIF4A2/EIF3J/RPS21/RPLP1/RPS29/RPS23	11
BP	GO:0042273	ribosomal large subunit biogenesis	9/420	33/6187	0.000249942	0.0160389	0.0154457	LTO1/RPL6/DHX30/NHP2/RPL7/MRPL20/MRTO4/RSL24D1/MRPL11	9
BP	GO:0031032	actomyosin structure organization	11/420	48/6187	0.00028204	0.0176678	0.0170143	TNNT3/TNNT1/TMOD4/MYOZ2/CAV3/CASQ1/ACTG1/MYL2/KLHL41/CFLAR/CSRP3	11
BP	GO:0000027	ribosomal large subunit assembly	6/420	16/6187	0.000420949	0.0251708	0.0242398	RPL6/DHX30/MRPL20/MRTO4/RSL24D1/MRPL11	6
BP	GO:0045214	sarcomere organization	6/420	16/6187	0.000420949	0.0251708	0.0242398	TNNT3/TNNT1/MYOZ2/CAV3/CASQ1/KLHL41	6
BP	GO:1901565	organonitrogen compound catabolic process	44/420	389/6187	0.000450923	0.0257109	0.0247599	FBXO6/UBE2D3/PSMC2/PSMA1/FAF2/PSMB7/PSME1/PSMC1/PSMD3/CTNNB1/ARIH2/UBC/HOGA1/DDRGK1/DNAJB9/PSMA2/HMOX2/DDIT3/ATP5IF1/PSMA4/UBL7/PSME2/RNF4/UCHL1/ACAT1/CTSV/SAT1/SNF8/USP4/CRBN/RNF13/ANXA2/UBE2D1/PSMD14/NSFL1C/PSMA7/BLVRA/PRPF19/RAD23A/PSMC6/PSMA3/NTAN1/CHAC2/RPS7	44
BP	GO:0003009	skeletal muscle contraction	5/420	11/6187	0.00046176	0.0257109	0.0247599	TNNT3/TNNT1/CAV3/TNNI2/CASQ1	5
BP	GO:0006479	protein methylation	10/420	43/6187	0.00046907	0.0257109	0.0247599	PIH1D1/NTMT1/METTL11B/CHTOP/MTF2/FBL/WDR61/FH/SMYD2/DPY30	10
BP	GO:0008213	protein alkylation	10/420	43/6187	0.00046907	0.0257109	0.0247599	PIH1D1/NTMT1/METTL11B/CHTOP/MTF2/FBL/WDR61/FH/SMYD2/DPY30	10
BP	GO:0034613	cellular protein localization	53/420	497/6187	0.000507312	0.0272395	0.026232	ZDHHC9/HIKESHI/FAF2/AHCYL1/PIH1D1/RAB9A/CTNNB1/CAV3/SSB/DDRGK1/DYNC2LI1/ENY2/TERF1/CCT3/CHTOP/TXNIP/RAP1A/DDIT3/NUTF2/TYROBP/ATP5IF1/PIGK/PRKAA2/USO1/ESAM/VPS26B/CD36/DDX3X/WDR45/KPNA3/SNF8/CLTC/IFT20/TIMM22/RANGRF/USP4/APPL1/PDCD10/AP2M1/CHCHD10/TOMM20/ANXA2/SRP14/NSFL1C/PIGU/HNRNPA2B1/PRPF19/RAB11A/IMMP1L/CSRP3/CALR/SAR1B/CD74	53
BP	GO:0051186	cofactor metabolic process	20/420	132/6187	0.000526393	0.0274778	0.0264615	UROS/MPC2/AHCYL1/PDHA1/HMOX2/NUBP2/SUCLG1/MGST1/COQ9/PANK4/ATP5IF1/COQ6/ACAT1/DCAKD/MAT2B/ACSS2/GSTK1/BLVRA/APIP/CHAC2	20
BP	GO:0070727	cellular macromolecule localization	53/420	498/6187	0.000532637	0.0274778	0.0264615	ZDHHC9/HIKESHI/FAF2/AHCYL1/PIH1D1/RAB9A/CTNNB1/CAV3/SSB/DDRGK1/DYNC2LI1/ENY2/TERF1/CCT3/CHTOP/TXNIP/RAP1A/DDIT3/NUTF2/TYROBP/ATP5IF1/PIGK/PRKAA2/USO1/ESAM/VPS26B/CD36/DDX3X/WDR45/KPNA3/SNF8/CLTC/IFT20/TIMM22/RANGRF/USP4/APPL1/PDCD10/AP2M1/CHCHD10/TOMM20/ANXA2/SRP14/NSFL1C/PIGU/HNRNPA2B1/PRPF19/RAB11A/IMMP1L/CSRP3/CALR/SAR1B/CD74	53
BP	GO:0006091	generation of precursor metabolites and energy	21/420	143/6187	0.000589991	0.0293551	0.0282693	ACO2/SDHD/NDUFA7/IDH3G/ENO3/SUCLG1/SDHC/ATP5PB/PTGES3/PFKM/GPI/FH/ADH5/ACAT1/SLC37A4/PGK1/NDUFB6/OXCT1/IDH3B/NDUFA5/NDUFV1	21
BP	GO:0033866	nucleoside bisphosphate biosynthetic process	6/420	17/6187	0.000613656	0.0293551	0.0282693	MPC2/PDHA1/PANK4/ACAT1/DCAKD/ACSS2	6
BP	GO:0034030	ribonucleoside bisphosphate biosynthetic process	6/420	17/6187	0.000613656	0.0293551	0.0282693	MPC2/PDHA1/PANK4/ACAT1/DCAKD/ACSS2	6
BP	GO:0034033	purine nucleoside bisphosphate biosynthetic process	6/420	17/6187	0.000613656	0.0293551	0.0282693	MPC2/PDHA1/PANK4/ACAT1/DCAKD/ACSS2	6
BP	GO:0060048	cardiac muscle contraction	9/420	37/6187	0.000632191	0.0297017	0.0286031	TNNT3/TNNT1/CAV3/TPM1/TMEM38B/RANGRF/ATP2A2/MYL2/CSRP3	9
BP	GO:0010499	proteasomal ubiquitin-independent protein catabolic process	5/420	12/6187	0.000747733	0.0345138	0.0332372	PSMA1/PSMB7/PSMA2/PSMA7/PSMA3	5
BP	GO:0034470	ncRNA processing	19/420	126/6187	0.000766113	0.0347525	0.033467	PIH1D1/URM1/RPP38/SSB/NHP2/BUD23/RPL7/TARBP2/FBL/PUSL1/RPP21/LSM6/UTP14A/ELP5/MTREX/RPS21/WDR55/TPRKB/RPS7	19
BP	GO:0042255	ribosome assembly	8/420	31/6187	0.000829066	0.0369707	0.0356032	RPL6/DHX30/MRPL20/MRTO4/DDX3X/RPS27L/RSL24D1/MRPL11	8
BP	GO:0010498	proteasomal protein catabolic process	20/420	138/6187	0.000939093	0.0411792	0.0396561	FBXO6/PSMA1/FAF2/PSMB7/PSME1/CTNNB1/DDRGK1/DNAJB9/PSMA2/DDIT3/PSME2/RNF4/CRBN/PSMD14/NSFL1C/PSMA7/PRPF19/RAD23A/PSMC6/PSMA3	20
BP	GO:0016571	histone methylation	8/420	32/6187	0.00104102	0.0449006	0.0432398	PIH1D1/CHTOP/MTF2/FBL/WDR61/FH/SMYD2/DPY30	8
BP	GO:0051146	striated muscle cell differentiation	15/420	91/6187	0.00107317	0.0452296	0.0435567	TNNT3/TNNT1/TMOD4/MYOZ2/KLHL40/CAV3/CASQ1/MYF6/UCHL1/MYOG/IFT20/MYL2/KLHL41/CFLAR/CSRP3	15
BP	GO:0003012	muscle system process	17/420	110/6187	0.00108304	0.0452296	0.0435567	TNNT3/TNNT1/TMOD4/MYOZ2/CAV3/TPM1/TNNI2/CASQ1/TMEM38B/MYL6/MYOG/RANGRF/ATP2A2/MYL2/ACTA2/CFLAR/CSRP3	17
BP	GO:0050879	multicellular organismal movement	5/420	13/6187	0.00114786	0.046462	0.0447434	TNNT3/TNNT1/CAV3/TNNI2/CASQ1	5
BP	GO:0050881	musculoskeletal movement	5/420	13/6187	0.00114786	0.046462	0.0447434	TNNT3/TNNT1/CAV3/TNNI2/CASQ1	5
CC	GO:1990904	ribonucleoprotein complex	54/428	273/7007	3.38e-15	1.2e-12	9.39e-13	RPL9/SNRPD3/MRPS18B/RPL6/SF3B1/GEMIN2/RPS20/ZFP36/PIH1D1/SNRPC/RBM3/RPP38/SSB/NPM1/MRPS26/SF3B2/EIF3M/HNRNPH1/NHP2/BUD31/RPL7/MRPS21/RBM8A/BCAS2/TARBP2/RPL13/FBL/MRPL20/RPL22/RPP21/LSM6/MRPL48/RPS3/SNRPE/DDX3X/UTP14A/RPL21/RPS27L/RSL24D1/EIF3J/MTREX/MRPS36/SRP14/RPS21/LSM8/MRPL11/PRPF19/RPLP1/CALR/RPS29/RPS23/NDUFAB1/MRPS5/RPS7	54
CC	GO:0005840	ribosome	30/428	127/7007	6.67e-11	1.19e-08	9.27e-09	RPL9/MRPS18B/RPL6/MTG1/RPS20/RPL22L1/MRPS26/RPL7/MRPS21/RPL13/MRPL20/RPL22/MRPL48/RPS3/RPS25/DDX3X/RPL21/RPS27L/RPS24/RSL24D1/MRPS36/RPS21/MRPL11/MRPL16/RPLP1/RPS29/RPS23/NDUFAB1/MRPS5/RPS7	30
CC	GO:0044391	ribosomal subunit	24/428	98/7007	2.61e-09	3.1e-07	2.42e-07	RPL9/MRPS18B/RPL6/RPS20/MRPS26/RPL7/MRPS21/RPL13/MRPL20/RPL22/MRPL48/RPS3/DDX3X/RPL21/RPS27L/RSL24D1/MRPS36/RPS21/MRPL11/RPLP1/RPS29/RPS23/NDUFAB1/RPS7	24
CC	GO:0000502	proteasome complex	14/428	39/7007	3e-08	2.14e-06	1.67e-06	PSMC2/PSMA1/PSMB7/PSME1/PSMC1/PSMD3/PSMA2/PSMA4/PSME2/PSMD2/PSMD14/PSMA7/PSMC6/PSMA3	14
CC	GO:1905369	endopeptidase complex	14/428	39/7007	3e-08	2.14e-06	1.67e-06	PSMC2/PSMA1/PSMB7/PSME1/PSMC1/PSMD3/PSMA2/PSMA4/PSME2/PSMD2/PSMD14/PSMA7/PSMC6/PSMA3	14
CC	GO:1905368	peptidase complex	15/428	48/7007	8.15e-08	4.84e-06	3.78e-06	PSMC2/PSMA1/PSMB7/PSME1/PSMC1/PSMD3/PSMA2/ENY2/PSMA4/PSME2/PSMD2/PSMD14/PSMA7/PSMC6/PSMA3	15
CC	GO:0098798	mitochondrial protein complex	23/428	117/7007	4.41e-07	2.24e-05	1.75e-05	ATP5MC2/MRPS18B/SDHD/HADHA/MRPS26/SDHC/MRPS21/ATP5PB/DMAC2/MRPL20/MRPL48/APOO/APOOL/NDUFB6/TIMM22/TOMM20/MTX2/MRPS36/NDUFA5/NDUFV1/MRPL11/IMMP1L/NDUFAB1	23
CC	GO:0043292	contractile fiber	15/428	57/7007	9.87e-07	4.18e-05	3.26e-05	TNNT3/TNNT1/PDLIM3/TMOD4/MYOZ2/CTNNB1/TNNI2/ARF1/CASQ1/TNNI3/PECAM1/MYL2/ACTA2/DES/CSRP3	15
CC	GO:0015935	small ribosomal subunit	12/428	37/7007	1.06e-06	4.18e-05	3.26e-05	MRPS18B/RPS20/MRPS26/MRPS21/RPS3/DDX3X/RPS27L/MRPS36/RPS21/RPS29/RPS23/RPS7	12
CC	GO:0022626	cytosolic ribosome	15/428	58/7007	1.26e-06	4.48e-05	3.5e-05	RPL9/RPL6/RPS20/RPL7/RPL13/RPS3/DDX3X/RPL21/RPS27L/RSL24D1/RPS21/RPLP1/RPS29/RPS23/RPS7	15
CC	GO:0022624	proteasome accessory complex	8/428	17/7007	2.71e-06	8.76e-05	6.84e-05	PSMC2/PSME1/PSMC1/PSMD3/PSME2/PSMD2/PSMD14/PSMC6	8
CC	GO:0030016	myofibril	13/428	54/7007	1.52e-05	0.00045039	0.000351576	TNNT3/TNNT1/PDLIM3/TMOD4/MYOZ2/CTNNB1/TNNI2/ARF1/CASQ1/TNNI3/MYL2/DES/CSRP3	13
CC	GO:0099080	supramolecular complex	37/428	296/7007	2.06e-05	0.000545743	0.000426008	TNNT3/TNNT1/PDLIM3/TMOD4/PSMC2/RPL6/MYOZ2/CTNNB1/DHX30/TPM1/LSM1/PSMA2/TNNI2/ARF1/CSPP1/CASQ1/CCT3/CHTOP/TUBA8/TNNI3/PRKAA2/RNF4/LSM6/DDX3X/LOC100624590/TPT1/ACTG1/PECAM1/SMTNL2/MYL2/ACTA2/DES/KNSTRN/DYNLRB1/RAB11A/CSRP3/KIF3A	37
CC	GO:0030017	sarcomere	12/428	48/7007	2.15e-05	0.000545743	0.000426008	TNNT3/TNNT1/PDLIM3/TMOD4/MYOZ2/CTNNB1/TNNI2/ARF1/CASQ1/TNNI3/DES/CSRP3	12
CC	GO:0005743	mitochondrial inner membrane	22/428	137/7007	2.47e-05	0.00058568	0.000457184	ATP5MC2/SDHD/MTG1/NDUFA7/HADHA/MPC2/HIGD1A/SDHC/ATP5PB/DMAC2/COQ6/UCP3/RPS3/APOO/APOOL/NDUFB6/TIMM22/NDUFAF5/NDUFA5/NDUFV1/IMMP1L/NDUFAB1	22
CC	GO:0005759	mitochondrial matrix	18/428	101/7007	3.27e-05	0.000727184	0.000567642	MRPS18B/MTG1/HADHA/DHX30/MRPS26/LACTB2/CASQ1/MRPS21/ETFB/MRPL20/MRPL48/PDK4/ACADVL/ACADS/MRPS36/TBRG4/MRPL11/NDUFAB1	18
CC	GO:0031966	mitochondrial membrane	28/428	205/7007	4.45e-05	0.000931167	0.000726872	ATP5MC2/SDHD/PEMT/MTG1/NDUFA7/HADHA/MPC2/HIGD1A/VDAC3/SDHC/ATP5PB/MGST1/DMAC2/COQ6/UCP3/RPS3/APOO/APOOL/NDUFB6/TIMM22/ACADVL/TOMM20/MTX2/NDUFAF5/NDUFA5/NDUFV1/IMMP1L/NDUFAB1	28
CC	GO:0022627	cytosolic small ribosomal subunit	8/428	25/7007	7.8e-05	0.00147546	0.00115175	RPS20/RPS3/DDX3X/RPS27L/RPS21/RPS29/RPS23/RPS7	8
CC	GO:0005681	spliceosomal complex	14/428	71/7007	7.87e-05	0.00147546	0.00115175	SNRPD3/SF3B1/GEMIN2/SNRPC/RBM3/SF3B2/HNRNPH1/BUD31/RBM8A/BCAS2/SNRPE/MTREX/LSM8/PRPF19	14
CC	GO:0005740	mitochondrial envelope	29/428	224/7007	8.77e-05	0.00156126	0.00121873	ATP5MC2/SDHD/PEMT/MTG1/NDUFA7/HADHA/MPC2/HIGD1A/VDAC3/SDHC/ATP5PB/MGST1/DMAC2/COQ6/UCP3/RPS3/APOO/APOOL/NDUFB6/TIMM22/ACADVL/TOMM20/MTX2/NDUFAF5/PRELID3B/NDUFA5/NDUFV1/IMMP1L/NDUFAB1	29
CC	GO:0005838	proteasome regulatory particle	6/428	14/7007	9.89e-05	0.00167601	0.0013083	PSMC2/PSMC1/PSMD3/PSMD2/PSMD14/PSMC6	6
CC	GO:0005684	U2-type spliceosomal complex	9/428	33/7007	0.000112418	0.00181913	0.00142001	SF3B1/SNRPC/SF3B2/BUD31/RBM8A/BCAS2/SNRPE/LSM8/PRPF19	9
CC	GO:0019866	organelle inner membrane	22/428	154/7007	0.000150847	0.00233485	0.00182259	ATP5MC2/SDHD/MTG1/NDUFA7/HADHA/MPC2/HIGD1A/SDHC/ATP5PB/DMAC2/COQ6/UCP3/RPS3/APOO/APOOL/NDUFB6/TIMM22/NDUFAF5/NDUFA5/NDUFV1/IMMP1L/NDUFAB1	22
CC	GO:0099081	supramolecular polymer	26/428	200/7007	0.000189677	0.002701	0.00210841	TNNT3/TNNT1/PDLIM3/TMOD4/MYOZ2/CTNNB1/TPM1/TNNI2/ARF1/CSPP1/CASQ1/CCT3/TUBA8/TNNI3/RNF4/TPT1/ACTG1/PECAM1/SMTNL2/MYL2/ACTA2/DES/DYNLRB1/RAB11A/CSRP3/KIF3A	26
CC	GO:0099512	supramolecular fiber	26/428	200/7007	0.000189677	0.002701	0.00210841	TNNT3/TNNT1/PDLIM3/TMOD4/MYOZ2/CTNNB1/TPM1/TNNI2/ARF1/CSPP1/CASQ1/CCT3/TUBA8/TNNI3/RNF4/TPT1/ACTG1/PECAM1/SMTNL2/MYL2/ACTA2/DES/DYNLRB1/RAB11A/CSRP3/KIF3A	26
CC	GO:0098800	inner mitochondrial membrane protein complex	13/428	69/7007	0.000228454	0.0029613	0.0023116	ATP5MC2/SDHD/SDHC/ATP5PB/DMAC2/APOO/APOOL/NDUFB6/TIMM22/NDUFA5/NDUFV1/IMMP1L/NDUFAB1	13
CC	GO:0000313	organellar ribosome	9/428	36/7007	0.000232911	0.0029613	0.0023116	MRPS18B/MTG1/MRPS26/MRPS21/MRPL20/MRPL48/MRPS36/MRPL11/NDUFAB1	9
CC	GO:0005761	mitochondrial ribosome	9/428	36/7007	0.000232911	0.0029613	0.0023116	MRPS18B/MTG1/MRPS26/MRPS21/MRPL20/MRPL48/MRPS36/MRPL11/NDUFAB1	9
CC	GO:0015934	large ribosomal subunit	12/428	61/7007	0.000259856	0.00318996	0.00249009	RPL9/RPL6/RPL7/RPL13/MRPL20/RPL22/MRPL48/RPL21/RSL24D1/MRPL11/RPLP1/NDUFAB1	12
CC	GO:0005865	striated muscle thin filament	5/428	11/7007	0.000282181	0.00334667	0.00261242	TNNT3/TNNT1/TMOD4/TNNI2/TNNI3	5
CC	GO:0071013	catalytic step 2 spliceosome	9/428	37/7007	0.000291423	0.00334667	0.00261242	SF3B1/SF3B2/HNRNPH1/BUD31/RBM8A/BCAS2/SNRPE/MTREX/PRPF19	9
CC	GO:0005839	proteasome core complex	6/428	17/7007	0.000348042	0.00387197	0.00302247	PSMA1/PSMB7/PSMA2/PSMA4/PSMA7/PSMA3	6
CC	GO:0120114	Sm-like protein family complex	9/428	38/7007	0.000361589	0.00390078	0.00304496	SF3B1/STRAP/SNRPC/LSM1/SF3B2/LSM6/SNRPE/LSM8/GEMIN6	9
CC	GO:0036379	myofilament	5/428	12/7007	0.000459596	0.00481224	0.00375645	TNNT3/TNNT1/TMOD4/TNNI2/TNNI3	5
CC	GO:0098556	cytoplasmic side of rough endoplasmic reticulum membrane	7/428	26/7007	0.000718803	0.00731125	0.00570719	RPL6/RPS20/RPL22/RPS3/RPS21/RPS29/RPS23	7
CC	GO:0031967	organelle envelope	36/428	341/7007	0.000809814	0.00779172	0.00608224	ATP5MC2/SDHD/PEMT/MTG1/NDUFA7/HADHA/MPC2/HIGD1A/VDAC3/ENY2/SDCBP/SDHC/CREB3L4/ATP5PB/MGST1/NUTF2/DMAC2/COQ6/UCP3/RPS3/CACYBP/APOO/APOOL/NDUFB6/KPNA3/TIMM22/ACADVL/TOMM20/MTX2/NDUFAF5/PRELID3B/NDUFA5/NDUFV1/IMMP1L/CALR/NDUFAB1	36
CC	GO:0031975	envelope	36/428	341/7007	0.000809814	0.00779172	0.00608224	ATP5MC2/SDHD/PEMT/MTG1/NDUFA7/HADHA/MPC2/HIGD1A/VDAC3/ENY2/SDCBP/SDHC/CREB3L4/ATP5PB/MGST1/NUTF2/DMAC2/COQ6/UCP3/RPS3/CACYBP/APOO/APOOL/NDUFB6/KPNA3/TIMM22/ACADVL/TOMM20/MTX2/NDUFAF5/PRELID3B/NDUFA5/NDUFV1/IMMP1L/CALR/NDUFAB1	36
CC	GO:1990234	transferase complex	30/428	271/7007	0.0010305	0.00965418	0.00753608	ZDHHC9/FBXO6/UBE2D3/CXXC1/GTF2F2/ARIH2/ANAPC13/NAA50/ANAPC16/YPEL5/ENY2/TAF13/MTF2/POLR2F/PRKAG1/PFKM/KANSL2/INO80C/WDR61/CHD8/DCUN1D5/SNRPE/CACYBP/CRBN/GTF2A2/UBE2D1/MRPS36/RPN2/DPF2/DPY30	30
CC	GO:0015629	actin cytoskeleton	17/428	122/7007	0.00111296	0.0101593	0.00793039	TNNT3/TNNT1/PDLIM3/TMOD4/MYOZ2/TPM1/TNNI2/MYL6/KANSL2/TNNI3/HSPB7/ACTG1/SMTNL2/MYL2/ACTA2/DCTN6/CAPZA2	17
CC	GO:0098554	cytoplasmic side of endoplasmic reticulum membrane	7/428	30/7007	0.00179894	0.0160106	0.0124979	RPL6/RPS20/RPL22/RPS3/RPS21/RPS29/RPS23	7
CC	GO:0022625	cytosolic large ribosomal subunit	7/428	31/7007	0.00220377	0.0191352	0.014937	RPL9/RPL6/RPL7/RPL13/RPL21/RSL24D1/RPLP1	7
CC	GO:0030867	rough endoplasmic reticulum membrane	7/428	32/7007	0.00267547	0.0226778	0.0177023	RPL6/RPS20/RPL22/RPS3/RPS21/RPS29/RPS23	7
CC	GO:0098796	membrane protein complex	40/428	419/7007	0.00288553	0.0238895	0.0186482	ATP5MC2/PSENEN/SDHD/SGCA/B2M/FAF2/ATP6V0D1/CTNNB1/CAV3/VDAC3/SDCBP/SDHC/HJV/ATP5PB/DMAC2/PIGK/SLA-DRB1/FXYD2/SGCE/APOO/APOOL/NDUFB6/CACNB1/SNF8/CLTC/TIMM22/AP2M1/VPS29/TOMM20/MTX2/CFLAR/PIGU/RPN2/NDUFA5/NDUFV1/IMMP1L/CALR/SAR1B/NDUFAB1/ATP6V0C	40
CC	GO:0000314	organellar small ribosomal subunit	4/428	11/7007	0.00320953	0.0248389	0.0193894	MRPS18B/MRPS26/MRPS21/MRPS36	4
CC	GO:0005763	mitochondrial small ribosomal subunit	4/428	11/7007	0.00320953	0.0248389	0.0193894	MRPS18B/MRPS26/MRPS21/MRPS36	4
CC	GO:0071007	U2-type catalytic step 2 spliceosome	4/428	11/7007	0.00320953	0.0248389	0.0193894	BUD31/BCAS2/SNRPE/PRPF19	4
CC	GO:0005791	rough endoplasmic reticulum	8/428	42/7007	0.00340414	0.0257845	0.0201275	RPL6/RPS20/RPL22/RPS3/RANGRF/RPS21/RPS29/RPS23	8
CC	GO:0005783	endoplasmic reticulum	33/428	332/7007	0.00355508	0.0263669	0.0205821	ZDHHC9/PRXL2B/FBXO6/RPL6/B2M/FAF2/RPS20/DNASE1L1/CAV3/PLCD4/DNAJB9/USE1/CASQ1/CREB3L4/TMEM38B/MGST1/RPL22/PIGK/RPS3/RPL21/RANGRF/RNF13/ATP2A2/SELENOM/POFUT1/PIGU/RPN2/RPS21/CALR/RPS29/RPS23/SAR1B/PUM3	33
CC	GO:0008180	COP9 signalosome	4/428	12/7007	0.00458449	0.0333077	0.0260001	COPS4/COPS7A/COPS5/COPS2	4
CC	GO:0030018	Z disc	6/428	28/7007	0.00597432	0.0425371	0.0332046	PDLIM3/MYOZ2/CTNNB1/CASQ1/DES/CSRP3	6
CC	GO:0044291	cell-cell contact zone	4/428	13/7007	0.00630665	0.0440229	0.0343644	CTNNB1/PECAM1/RANGRF/DES	4
CC	GO:0097525	spliceosomal snRNP complex	6/428	29/7007	0.00715346	0.0489737	0.038229	SF3B1/SNRPC/SF3B2/LSM6/SNRPE/LSM8	6
MF	GO:0003723	RNA binding	67/410	473/6851	9.55e-12	4.04e-09	3.66e-09	RPL9/YBX3/DENR/RPL6/SF3B1/EEF1B2/RPS20/ZFP36/TRNAU1AP/SNRPC/RBM25/AIMP1/RBM3/RPP38/DHX30/LSM1/SSB/NPM1/EIF3M/HNRNPM/EEF2/HNRNPH1/NHP2/SRSF7/LACTB2/RBM8A/RNPC3/TARBP2/RPL13/RBM18/FBL/PUSL1/MRPL20/RPL22/PPIE/SERBP1/RPP21/HNRNPC/SRSF5/LSM6/RPS3/SNRPE/DDX3X/LOC100624590/FXR1/EIF4A2/DDX55/RPS27L/DGCR8/GTF2A2/RSL24D1/EIF3J/MTREX/SRP14/RBM39/NELFCD/LSM8/HNRNPA2B1/MRPL11/MRPL16/CALR/CIRBP/PTBP1/RNPS1/MRP…	67
MF	GO:0003735	structural constituent of ribosome	23/410	104/6851	3.06e-08	6.46e-06	5.85e-06	RPL9/MRPS18B/RPL6/RPS20/RPL22L1/RPL7/MRPS21/RPL13/MRPL20/RPL22/RPS3/RPL21/RPS27L/RPS24/RSL24D1/RPS21/MRPL11/MRPL16/RPLP1/RPS29/RPS23/MRPS5/RPS7	23
MF	GO:0005198	structural molecule activity	29/410	218/6851	3.63e-05	0.00512317	0.00464062	RPL9/PDLIM3/MRPS18B/RPL6/RPS20/RPL22L1/RPL7/MRPS21/MYL6/TUBA8/RPL13/NUTF2/MRPL20/RPL22/RPS3/RPL21/CLTC/RPS27L/RPS24/RSL24D1/RPS21/MRPL11/MRPL16/CSRP3/RPLP1/RPS29/RPS23/MRPS5/RPS7	29
MF	GO:0003729	mRNA binding	16/410	99/6851	0.000230426	0.0243675	0.0220724	YBX3/DENR/SF3B1/ZFP36/SNRPC/RBM25/SSB/RBM8A/SERBP1/SRSF5/DDX3X/FXR1/CALR/PTBP1/PUM3/RPS7	16
MF	GO:0004298	threonine-type endopeptidase activity	6/410	18/6851	0.000443457	0.0312637	0.028319	PSMA1/PSMB7/PSMA2/PSMA4/PSMA7/PSMA3	6
MF	GO:0070003	threonine-type peptidase activity	6/410	18/6851	0.000443457	0.0312637	0.028319	PSMA1/PSMB7/PSMA2/PSMA4/PSMA7/PSMA3	6

## Sheet: Supplementary Table S5-2
Supplementary Table S5-2 KEGG analysis of splicing isoforms occurring only in group H
ID	Description	GeneRatio	BgRatio	Pvalue	Padjust	Qvalue	GeneID	Count
ssc03010	Ribosome	31/427	151/8835	4.11e-12	1.18e-09	1.04e-09	RPL9/MRPS15/RPL6/FAU/RPS20/RPL22L1/RPL7/MRPS21/RPL13/RPS9/MRPL20/RPL22/MRPS18C/RPS3/RPS25/RPL21/RPL19/RPL24/RPS27L/RPS24/RSL24D1/RPS21/MRPL11/MRPL16/RPLP1/RPS29/RPS23/RPS2/RPL3L/MRPS5/RPS7	31
ssc03040	Spliceosome	27/427	125/8835	3.02e-11	4.33e-09	3.8e-09	SNRPD3/SF3B1/PUF60/SNRPC/RBM25/SF3B2/HNRNPM/BUD31/SRSF7/RBM8A/BCAS2/PHF5A/PPIE/THOC1/PPIH/SRSF3/HNRNPC/SRSF5/LSM6/CWC15/SNRPE/HNRNPK/DDX42/CCDC12/U2AF1/LSM8/PRPF19	27
ssc03050	Proteasome	16/427	46/8835	1.75e-10	1.67e-08	1.47e-08	PSMC2/PSMA1/PSMB7/PSME1/PSMC1/PSMD3/PSMA2/PSMB2/PSMA4/PSME2/PSMD2/PSMD14/PSMA7/PSMC3/PSMC6/PSMA3	16
ssc01200	Carbon metabolism	24/427	112/8835	4.63e-10	3.32e-08	2.91e-08	ALDOA/ACO2/SDHD/PKM/PDHA1/IDH3G/SUCLA2/ENO3/SUCLG1/SDHC/PFKM/GPI/FH/ADH5/ACAT1/PGK1/ESD/TKT/PFKL/ACADS/SDHA/IDH3B/ACSS2/TALDO1	24
ssc05012	Parkinson disease	38/427	268/8835	1.64e-09	9.4e-08	8.24e-08	ATP5MC2/SDHD/PSMC2/ATP5F1C/PSMA1/NDUFA7/PSMB7/PSMC1/PSMD3/ATP5PF/UBC/VDAC3/PPIF/PSMA2/SDHC/ATP5PB/ATF4/TXN2/DDIT3/TUBA8/PSMB2/PSMA4/CALM1/UCHL1/KLC1/NDUFB6/PSMD2/PSMD14/NFE2L2/SDHA/PSMA7/NDUFA5/NDUFV1/PSMC3/CALML4/PSMC6/PSMA3/NDUFAB1	38
ssc05014	Amyotrophic lateral sclerosis	44/427	364/8835	1.29e-08	6.16e-07	5.4e-07	ATP5MC2/SDHD/PSMC2/ATP5F1C/PSMA1/NDUFA7/MAPK12/PSMB7/ANG/PSMC1/PSMD3/ATP5PF/PSMA2/SRSF7/DERL1/SDHC/ATP5PB/ATF4/DDIT3/TUBA8/MAP1LC3B/PSMB2/SRSF3/PSMA4/NRG4/KLC1/NDUFB6/ACTG1/PSMD2/CHCHD10/DCTN6/PSMD14/GPX8/SDHA/PSMA7/NDUFA5/HNRNPA2B1/NDUFV1/NXF1/PSMC3/SQSTM1/PSMC6/PSMA3/NDUFAB1	44
ssc05020	Prion disease	36/427	273/8835	3.15e-08	1.29e-06	1.13e-06	ATP5MC2/SDHD/PSMC2/ATP5F1C/PSMA1/NDUFA7/MAPK12/PSMB7/PSMC1/PSMD3/CAV3/ATP5PF/VDAC3/PPIF/PSMA2/STIP1/SDHC/CREB3L4/ATP5PB/ATF4/DDIT3/TUBA8/PSMB2/PSMA4/KLC1/NDUFB6/PSMD2/PSMD14/SDHA/PSMA7/NDUFA5/NDUFV1/PSMC3/PSMC6/PSMA3/NDUFAB1	36
ssc05016	Huntington disease	37/427	308/8835	2.33e-07	8.35e-06	7.32e-06	ATP5MC2/SDHD/PSMC2/ATP5F1C/PSMA1/NDUFA7/PSMB7/PSMC1/PSMD3/ATP5PF/VDAC3/PPIF/PSMA2/SDHC/CREB3L4/CLTA/ATP5PB/POLR2F/TUBA8/PSMB2/PSMA4/KLC1/NDUFB6/CLTC/AP2M1/PSMD2/DCTN6/PSMD14/GPX8/SDHA/PSMA7/NDUFA5/NDUFV1/PSMC3/PSMC6/PSMA3/NDUFAB1	37
ssc00020	Citrate cycle (TCA cycle)	10/427	29/8835	5.48e-07	1.75e-05	1.53e-05	ACO2/SDHD/PDHA1/IDH3G/SUCLA2/SUCLG1/SDHC/FH/SDHA/IDH3B	10
ssc05022	Pathways of neurodegeneration - multiple diseases	47/427	474/8835	1.66e-06	4.77e-05	4.18e-05	ATP5MC2/SDHD/PSMC2/ATP5F1C/PSMA1/NDUFA7/MAPK12/PSMB7/PSMC1/PSMD3/CTNNB1/ATP5PF/UBC/VDAC3/PPIF/PSMA2/CSNK1A1/DERL1/SDHC/ATP5PB/ATF4/DDIT3/TUBA8/MAP1LC3B/PSMB2/PSMA4/CALM1/UCHL1/CAPN2/KLC1/NDUFB6/PSMD2/ATP2A2/DCTN6/PSMD14/GPX8/SDHA/PSMA7/CDK5/NDUFA5/NDUFV1/PSMC3/CALML4/SQSTM1/PSMC6/PSMA3/NDUFAB1	47
ssc05010	Alzheimer disease	40/427	384/8835	3.12e-06	8.13e-05	7.13e-05	ATP5MC2/PSENEN/SDHD/PSMC2/ATP5F1C/PSMA1/NDUFA7/PSMB7/PSMC1/PSMD3/CTNNB1/ATP5PF/VDAC3/PPIF/PSMA2/CSNK1A1/SDHC/ATP5PB/ATF4/DDIT3/TUBA8/PSMB2/PSMA4/CALM1/CAPN2/KLC1/NDUFB6/PSMD2/ATP2A2/PSMD14/SDHA/PSMA7/CDK5/NDUFA5/NDUFV1/PSMC3/CALML4/PSMC6/PSMA3/NDUFAB1	40
ssc01230	Biosynthesis of amino acids	13/427	72/8835	3.41e-05	0.000815944	0.000715242	ALDOA/ACO2/PKM/IDH3G/ENO3/PFKM/PGK1/ACY1/TKT/PFKL/MAT2B/IDH3B/TALDO1	13
ssc05415	Diabetic cardiomyopathy	24/427	205/8835	4.96e-05	0.00109472	0.000959608	ATP5MC2/SDHD/COL1A2/ATP5F1C/PPP1CA/NDUFA7/MPC2/MAPK12/PDHA1/ATP5PF/VDAC3/PPIF/SDHC/ATP5PB/CPT1B/TNNI3/PDK4/CD36/NDUFB6/ATP2A2/SDHA/NDUFA5/NDUFV1/NDUFAB1	24
ssc05171	Coronavirus disease - COVID-19	27/427	250/8835	7.06e-05	0.00144747	0.00126883	RPL9/RPL6/FAU/RPS20/MAPK12/RPL22L1/RPL7/RPL13/RPS9/RPL22/RPS3/RPS25/RPL21/RPL19/RPL24/RPS27L/RPS24/RSL24D1/STAT1/RPS21/RPLP1/RPS29/CFD/RPS23/RPS2/RPL3L/RPS7	27
ssc04141	Protein processing in endoplasmic reticulum	20/427	167/8835	0.000153206	0.00288609	0.00252989	UBXN1/FBXO6/UBE2D3/SSR2/RBX1/DERL1/ATF4/DDIT3/CAPN2/DNAJA1/P4HB/DERL2/UFD1/UBE2D1/NFE2L2/NSFL1C/RPN2/RAD23A/CALR/SAR1B	20
ssc00010	Glycolysis / Gluconeogenesis	11/427	62/8835	0.000160897	0.00288609	0.00252989	ALDOA/G6PC3/PKM/PDHA1/ENO3/PFKM/GPI/ADH5/PGK1/PFKL/ACSS2	11
ssc00190	Oxidative phosphorylation	17/427	137/8835	0.000309936	0.00523244	0.00458666	ATP5MC2/SDHD/ATP5F1C/NDUFA7/ATP6V0D1/ATP5PF/SDHC/ATP5PB/ATP6V0B/PPA2/NDUFB6/PPA1/SDHA/NDUFA5/NDUFV1/NDUFAB1/ATP6V0C	17
ssc01212	Fatty acid metabolism	10/427	57/8835	0.000349933	0.00536663	0.00470429	HADHA/CPT1B/HSD17B8/ACAT1/HACD1/ACADVL/OXSM/ACADS/HACD3/HADHB	10
ssc05410	Hypertrophic cardiomyopathy	13/427	90/8835	0.000358155	0.00536663	0.00470429	SGCA/TPM1/TPM2/PRKAG1/TNNI3/PRKAA2/ACTG1/CACNB1/DAG1/ATP2A2/MYL2/DES/PRKAA1	13
ssc03018	RNA degradation	12/427	79/8835	0.000373981	0.00536663	0.00470429	ENO3/LSM1/PFKM/EXOSC5/WDR61/LSM6/EXOSC9/EXOSC8/EXOSC7/PFKL/MTREX/LSM8	12
ssc05017	Spinocerebellar ataxia	17/427	146/8835	0.000655166	0.00895394	0.00784886	PSMC2/PSMA1/PSMB7/PSMC1/PSMD3/VDAC3/PPIF/PSMA2/PSMB2/PSMA4/PSMD2/ATP2A2/PSMD14/PSMA7/PSMC3/PSMC6/PSMA3	17
ssc04714	Thermogenesis	23/427	232/8835	0.000818515	0.0106779	0.00936006	ATP5MC2/SDHD/ATP5F1C/NDUFA7/MAPK12/ATP5PF/SDHC/CREB3L4/ATP5PB/CPT1B/PRKAG1/PRKAA2/NDUFB6/ACTG1/NDUFAF8/RPS6KB1/PRKAA1/SDHA/NDUFAF5/NDUFA5/PNPLA2/NDUFV1/NDUFAB1	23
ssc04922	Glucagon signaling pathway	13/427	101/8835	0.00109826	0.0137043	0.012013	G6PC3/PKM/PDHA1/CREB3L4/CPT1B/ATF4/PRKAG1/PFKM/PRKAA2/CALM1/PFKL/PRKAA1/CALML4	13
ssc00030	Pentose phosphate pathway	6/427	29/8835	0.00226238	0.0270543	0.0237153	ALDOA/PFKM/GPI/TKT/PFKL/TALDO1	6
ssc00640	Propanoate metabolism	6/427	32/8835	0.00381835	0.0427583	0.0374811	HADHA/SUCLA2/SUCLG1/ECHDC1/ACADS/ACSS2	6
ssc00071	Fatty acid degradation	7/427	43/8835	0.00417154	0.0427583	0.0374811	HADHA/CPT1B/ADH5/ACAT1/ACADVL/ACADS/HADHB	7
ssc00620	Pyruvate metabolism	7/427	43/8835	0.00417154	0.0427583	0.0374811	PKM/PDHA1/FH/ADH5/ACAT1/ACSS2/ACYP2	7
ssc03420	Nucleotide excision repair	7/427	43/8835	0.00417154	0.0427583	0.0374811	RBX1/CETN2/POLE3/ERCC1/RFC4/RAD23A/RFC2	7

## Sheet: Supplementary Table S5-3
Supplementary Table S5-3 GO analysis of splicing isoforms occurring only in group L
Ontology	ID	Description	GeneRatio	BgRatio	Pvalue	Padjust	Qvalue	GeneID	Count
BP	GO:0006412	translation	48/516	239/6187	4.69e-09	1.21e-05	1.19e-05	MRPL24/METTL17/EIF5A/MTG1/EIF4A2/MAPKAPK5/RPS21/MRPL55/RPL3/TRNAU1AP/EIF3I/RPS17/RPS3/LOC100624149/FXR1/DENR/DRG1/RPS23/PAIP2/MRPS11/EIF3H/RPS20/RPL5/RPL12/RPL11/MRPS18B/RPS18/NARS2/EIF2S3/FTSJ1/RBM3/RPS4X/EIF1/MRPL27/MRPL3/RPL14/RPUSD3/RPS24/PAIP1/EIF2S2/RPLP2/MRPL11/RACK1/MRPS17/RPS6/MRPS5/MRPL33/RPS7	48
BP	GO:0043043	peptide biosynthetic process	48/516	245/6187	1.09e-08	1.41e-05	1.39e-05	MRPL24/METTL17/EIF5A/MTG1/EIF4A2/MAPKAPK5/RPS21/MRPL55/RPL3/TRNAU1AP/EIF3I/RPS17/RPS3/LOC100624149/FXR1/DENR/DRG1/RPS23/PAIP2/MRPS11/EIF3H/RPS20/RPL5/RPL12/RPL11/MRPS18B/RPS18/NARS2/EIF2S3/FTSJ1/RBM3/RPS4X/EIF1/MRPL27/MRPL3/RPL14/RPUSD3/RPS24/PAIP1/EIF2S2/RPLP2/MRPL11/RACK1/MRPS17/RPS6/MRPS5/MRPL33/RPS7	48
BP	GO:0034622	cellular protein-containing complex assembly	57/516	331/6187	5.73e-08	4.91e-05	4.84e-05	TMOD4/DHX30/COPS7A/DMAC2/SF3A3/PSMD10/SF3B1/FMC1/RPL3/GMFG/EIF3I/SNRPD1/RNF4/PSMC2/LOC100624149/RANGRF/DENR/DRG1/SRP19/MRPS11/NDUFAB1/EIF3H/TERF1/PSMD4/PTGES3/CCT2/PIH1D1/RPL11/SNRPC/SMIM20/H3F3A/CD36/EIF2S3/SRPK3/MSRB2/PSMC5/NDUFAF3/RHOA/ARPC4/BRK1/GTF2A2/NCKAP1/NDUFB3/MAPRE1/EIF2S2/CAPZA2/PSMD13/NAP1L4/MRPL11/NDUFA13/GEMIN2/NDUFA11/PRPF39/NDUFS7/GPX4/ARPC1A/RTN4	57
BP	GO:0051603	proteolysis involved in cellular protein catabolic process	44/516	229/6187	8.45e-08	5.44e-05	5.36e-05	PSMB3/DDRGK1/PSME1/UBE2D3/PSMD10/NSFL1C/PSMA7/RAD23A/PSMA5/USP5/PSME2/RNF4/UCHL1/PSMC2/CTSV/RNF13/UBE2L3/UBE2B/PSMA3/VPS28/PSMD4/USP15/PSMD8/FBXO6/RPL11/NRDC/RNF5/UCHL5/USP2/NDFIP2/PSMC5/PSMD3/SNF8/ARIH2/CRBN/PSMD14/PSMA2/PSMD13/PSMA1/RACK1/KEAP1/RNF128/PSMC6/RPS7	44
BP	GO:0044257	cellular protein catabolic process	45/516	239/6187	1.12e-07	5.76e-05	5.68e-05	PSMB3/DDRGK1/PSME1/UBE2D3/PSMD10/NSFL1C/PSMA7/RAD23A/PSMA5/USP5/PSME2/RNF4/UCHL1/PSMC2/CTSV/RNF13/UBE2L3/ANXA2/UBE2B/PSMA3/VPS28/PSMD4/USP15/PSMD8/FBXO6/RPL11/NRDC/RNF5/UCHL5/USP2/NDFIP2/PSMC5/PSMD3/SNF8/ARIH2/CRBN/PSMD14/PSMA2/PSMD13/PSMA1/RACK1/KEAP1/RNF128/PSMC6/RPS7	45
BP	GO:0006511	ubiquitin-dependent protein catabolic process	39/516	195/6187	1.58e-07	6.28e-05	6.19e-05	PSMB3/DDRGK1/UBE2D3/PSMD10/NSFL1C/PSMA7/RAD23A/PSMA5/USP5/RNF4/UCHL1/PSMC2/RNF13/UBE2L3/UBE2B/PSMA3/VPS28/PSMD4/USP15/PSMD8/FBXO6/RPL11/RNF5/UCHL5/USP2/NDFIP2/PSMC5/PSMD3/SNF8/ARIH2/CRBN/PSMA2/PSMD13/PSMA1/RACK1/KEAP1/RNF128/PSMC6/RPS7	39
BP	GO:0043604	amide biosynthetic process	51/516	291/6187	1.71e-07	6.28e-05	6.19e-05	MRPL24/METTL17/EIF5A/MTG1/EIF4A2/MAPKAPK5/RPS21/MRPL55/RPL3/TRNAU1AP/EIF3I/RPS17/RPS3/LOC100624149/FXR1/DENR/DRG1/RPS23/PAIP2/MRPS11/EIF3H/RPS20/RPL5/RPL12/RPL11/MRPS18B/RPS18/FH/NARS2/ACAT1/EIF2S3/FTSJ1/RBM3/RPS4X/EIF1/MRPL27/MRPL3/RPL14/PDHB/RPUSD3/RPS24/PAIP1/EIF2S2/RPLP2/MRPL11/RACK1/MRPS17/RPS6/MRPS5/MRPL33/RPS7	51
BP	GO:0019941	modification-dependent protein catabolic process	39/516	199/6187	2.77e-07	8.92e-05	8.79e-05	PSMB3/DDRGK1/UBE2D3/PSMD10/NSFL1C/PSMA7/RAD23A/PSMA5/USP5/RNF4/UCHL1/PSMC2/RNF13/UBE2L3/UBE2B/PSMA3/VPS28/PSMD4/USP15/PSMD8/FBXO6/RPL11/RNF5/UCHL5/USP2/NDFIP2/PSMC5/PSMD3/SNF8/ARIH2/CRBN/PSMA2/PSMD13/PSMA1/RACK1/KEAP1/RNF128/PSMC6/RPS7	39
BP	GO:0043632	modification-dependent macromolecule catabolic process	39/516	201/6187	3.64e-07	0.000104169	0.000102622	PSMB3/DDRGK1/UBE2D3/PSMD10/NSFL1C/PSMA7/RAD23A/PSMA5/USP5/RNF4/UCHL1/PSMC2/RNF13/UBE2L3/UBE2B/PSMA3/VPS28/PSMD4/USP15/PSMD8/FBXO6/RPL11/RNF5/UCHL5/USP2/NDFIP2/PSMC5/PSMD3/SNF8/ARIH2/CRBN/PSMA2/PSMD13/PSMA1/RACK1/KEAP1/RNF128/PSMC6/RPS7	39
BP	GO:0006518	peptide metabolic process	50/516	292/6187	4.77e-07	0.000122814	0.00012099	MRPL24/METTL17/EIF5A/MTG1/EIF4A2/MAPKAPK5/RPS21/MRPL55/RPL3/TRNAU1AP/EIF3I/RPS17/RPS3/LOC100624149/FXR1/DENR/DRG1/RPS23/PAIP2/MRPS11/EIF3H/RPS20/RPL5/RPL12/RPL11/NRDC/MRPS18B/RPS18/NARS2/EIF2S3/FTSJ1/RBM3/RPS4X/EIF1/MRPL27/MRPL3/RPL14/RPUSD3/RPS24/PAIP1/EIF2S2/GSTK1/RPLP2/MRPL11/RACK1/MRPS17/RPS6/MRPS5/MRPL33/RPS7	50
BP	GO:0006508	proteolysis	62/516	412/6187	2.07e-06	0.000485421	0.000478215	PSMB3/FAM162A/DDRGK1/PSME1/UBE2D3/PSMD10/NSFL1C/PSMA7/RAD23A/ENY2/PSMA5/USP5/CAPNS1/PSME2/RNF4/UCHL1/COPS4/PSMC2/CTSV/RNF13/UBE2L3/ANXA2/UBE2B/PSMA3/VPS28/COPS5/PSMD4/USP15/METAP2/PSENEN/PSMD8/PIH1D1/BCL2L12/FBXO6/RPL11/NRDC/RNF5/UCHL5/USP2/BRCC3/NDFIP2/PCID2/PSMC5/PSMD3/SNF8/CLEC3B/ARIH2/RHOA/CRBN/COPS2/PSMD14/PSMA2/PSMD13/NR1H3/IMMP1L/PSMA1/RACK1/NDUFA13/KEAP1/RNF128/PSMC6/RPS7	62
BP	GO:0030163	protein catabolic process	48/516	291/6187	2.49e-06	0.000534685	0.000526748	PSMB3/DDRGK1/MAD2L2/PSME1/UBE2D3/PSMD10/NSFL1C/PSMA7/RAD23A/PSMA5/USP5/PSME2/RNF4/UCHL1/PSMC2/CTSV/RNF13/UBE2L3/ANXA2/UBE2B/PSMA3/VPS28/PSMD4/USP15/PSMD8/FBXO6/RPL11/NRDC/RNF5/UCHL5/USP2/NDFIP2/PSMC5/PSMD3/SNF8/ARIH2/CRBN/PSMD14/PSMA2/PSMD13/PSMA1/RACK1/NDUFA13/KEAP1/OAZ1/RNF128/PSMC6/RPS7	48
BP	GO:0022618	ribonucleoprotein complex assembly	20/516	78/6187	3.7e-06	0.000732291	0.00072142	DHX30/SF3A3/SF3B1/RPL3/EIF3I/SNRPD1/LOC100624149/DENR/MRPS11/EIF3H/PTGES3/PIH1D1/RPL11/SNRPC/EIF2S3/SRPK3/EIF2S2/MRPL11/GEMIN2/PRPF39	20
BP	GO:0022613	ribonucleoprotein complex biogenesis	31/516	157/6187	4.06e-06	0.000747206	0.000736114	DHX30/SF3A3/RRP9/SF3B1/RPS21/RPL3/NIP7/EIF3I/SNRPD1/RPS17/TSR2/LOC100624149/DENR/WDR74/MRPS11/EIF3H/PTGES3/PIH1D1/RPL11/SNRPC/EIF2S3/SRPK3/RPL14/NPM3/EIF2S2/MRPL11/GEMIN2/PRPF39/BUD23/RPS6/RPS7	31
BP	GO:0071826	ribonucleoprotein complex subunit organization	20/516	81/6187	6.91e-06	0.00118609	0.00116848	DHX30/SF3A3/SF3B1/RPL3/EIF3I/SNRPD1/LOC100624149/DENR/MRPS11/EIF3H/PTGES3/PIH1D1/RPL11/SNRPC/EIF2S3/SRPK3/EIF2S2/MRPL11/GEMIN2/PRPF39	20
BP	GO:0044265	cellular macromolecule catabolic process	51/516	329/6187	7.68e-06	0.00123484	0.00121651	RNASEH1/PSMB3/DDRGK1/PSME1/UBE2D3/PSMD10/NSFL1C/PSMA7/RAD23A/PSMA5/USP5/PSME2/RNF4/UCHL1/PSMC2/CTSV/DNASE1L1/RNF13/UBE2L3/ANXA2/SSB/UBE2B/PSMA3/VPS28/PSMD4/RBM8A/USP15/PSMD8/FBXO6/RPL11/NRDC/RNF5/UCHL5/USP2/NDFIP2/PCID2/PSMC5/PSMD3/SNF8/ARIH2/CRBN/PSMD14/PSMA2/PSMD13/RNASEH2C/PSMA1/RACK1/KEAP1/RNF128/PSMC6/RPS7	51
BP	GO:0043603	cellular amide metabolic process	56/516	375/6187	8.58e-06	0.00129947	0.00128018	MRPL24/METTL17/EIF5A/MTG1/EIF4A2/MAPKAPK5/PLPP1/RPS21/MRPL55/RPL3/TRNAU1AP/EIF3I/RPS17/RPS3/LOC100624149/FXR1/DENR/DRG1/RPS23/PAIP2/MRPS11/EIF3H/RPS20/RPL5/RPL12/RPL11/NRDC/MRPS18B/RPS18/FH/NARS2/ACAT1/EIF2S3/FTSJ1/RBM3/RPS4X/EIF1/MRPL27/MRPL3/RPL14/PDHB/RPUSD3/NIT2/RPS24/PAIP1/EIF2S2/GSTK1/RPLP2/MRPL11/RACK1/MRPS17/RPS6/MRPS5/SUCLG1/MRPL33/RPS7	56
BP	GO:0008380	RNA splicing	27/516	134/6187	1.16e-05	0.00165751	0.0016329	U2AF1L4/SF3A3/SF3B1/SF3B6/SNRPD1/SRSF5/PQBP1/RBM5/SCNM1/RBM8A/BCAS2/RBFOX2/HNRNPA1/SRSF10/SNRPC/TRA2A/RBM3/SRPK3/TRA2B/LSM8/UBL5/GEMIN2/HNRNPM/PRPF39/CLK4/SNRNP27/SRSF7	27
BP	GO:0006396	RNA processing	48/516	310/6187	1.49e-05	0.00198876	0.00195924	RPP21/TPRKB/U2AF1L4/PUSL1/SF3A3/RRP9/SF3B1/RPS21/QTRT1/SF3B6/SNRPD1/RPS17/OSGEP/SRSF5/PQBP1/TSR2/RBM5/SSB/OSGEPL1/RBM39/MRPS11/SCNM1/RBM8A/BCAS2/RBFOX2/HNRNPA1/PIH1D1/SRSF10/SNRPC/TRA2A/FTSJ1/RBM3/SRPK3/CCNL1/TRA2B/NPM3/LSM8/HNRNPA2B1/UBL5/GEMIN2/HNRNPM/PRPF39/CLK4/BUD23/RPS6/SNRNP27/SRSF7/RPS7	48
BP	GO:0065003	protein-containing complex assembly	63/516	447/6187	1.55e-05	0.00198876	0.00195924	TMOD4/DHX30/COPS7A/DMAC2/SF3A3/PSMD10/SF3B1/FMC1/RPL3/PFKM/GMFG/EIF3I/SNRPD1/RNF4/PSMC2/LOC100624149/RANGRF/TP63/DENR/DRG1/ANXA2/B2M/SRP19/MRPS11/NDUFAB1/EIF3H/TERF1/CCT3/PSMD4/PTGES3/CCT2/PIH1D1/RPL11/SNRPC/SMIM20/H3F3A/CD36/EIF2S3/SRPK3/MSRB2/PSMC5/NDUFAF3/RHOA/ARPC4/BRK1/GTF2A2/NCKAP1/NDUFB3/MAPRE1/EIF2S2/CAPZA2/PSMD13/NAP1L4/MRPL11/RACK1/NDUFA13/GEMIN2/NDUFA11/PRPF39/NDUFS7/GPX4/ARPC1A/RTN4	63
BP	GO:1901565	organonitrogen compound catabolic process	56/516	389/6187	2.58e-05	0.0031661	0.00311911	PSMB3/DDRGK1/MAD2L2/PSME1/UBE2D3/PSMD10/NSFL1C/PSMA7/RAD23A/PSMA5/USP5/GOT2/PSME2/RNF4/UCHL1/PSMC2/CTSV/RNF13/UBE2L3/ANXA2/UBE2B/PSMA3/VPS28/PSMD4/USP15/PSMD8/FBXO6/RPL11/NRDC/RNF5/UCHL5/ACAT1/USP2/SAT1/NDFIP2/NT5C/PSMC5/PSMD3/SNF8/ARIH2/HYAL3/CRBN/NUDT13/DUT/PSMD14/PSMA2/PSMD13/PSMA1/RACK1/NDUFA13/KEAP1/OAZ1/RNF128/PSMC6/HMOX2/RPS7	56
BP	GO:0009057	macromolecule catabolic process	55/516	391/6187	5.92e-05	0.00692648	0.00682366	RNASEH1/PSMB3/DDRGK1/MAD2L2/PSME1/UBE2D3/PSMD10/NSFL1C/PSMA7/RAD23A/PSMA5/USP5/PSME2/RNF4/UCHL1/PSMC2/CTSV/DNASE1L1/RNF13/UBE2L3/ANXA2/SSB/UBE2B/PSMA3/VPS28/PSMD4/RBM8A/USP15/PSMD8/FBXO6/RPL11/NRDC/RNF5/UCHL5/USP2/NDFIP2/PCID2/PSMC5/PSMD3/SNF8/ARIH2/HYAL3/CRBN/PSMD14/PSMA2/PSMD13/RNASEH2C/PSMA1/RACK1/NDUFA13/KEAP1/OAZ1/RNF128/PSMC6/RPS7	55
BP	GO:0000375	RNA splicing via transesterification reactions	22/516	109/6187	7.28e-05	0.00749792	0.00738662	U2AF1L4/SF3A3/SF3B1/SF3B6/SNRPD1/SRSF5/PQBP1/RBM5/RBM8A/BCAS2/HNRNPA1/SNRPC/TRA2A/RBM3/SRPK3/TRA2B/LSM8/UBL5/GEMIN2/HNRNPM/PRPF39/SRSF7	22
BP	GO:0000377	RNA splicing via transesterification reactions with bulged adenosine as nucleophile	22/516	109/6187	7.28e-05	0.00749792	0.00738662	U2AF1L4/SF3A3/SF3B1/SF3B6/SNRPD1/SRSF5/PQBP1/RBM5/RBM8A/BCAS2/HNRNPA1/SNRPC/TRA2A/RBM3/SRPK3/TRA2B/LSM8/UBL5/GEMIN2/HNRNPM/PRPF39/SRSF7	22
BP	GO:0000398	mRNA splicing via spliceosome	22/516	109/6187	7.28e-05	0.00749792	0.00738662	U2AF1L4/SF3A3/SF3B1/SF3B6/SNRPD1/SRSF5/PQBP1/RBM5/RBM8A/BCAS2/HNRNPA1/SNRPC/TRA2A/RBM3/SRPK3/TRA2B/LSM8/UBL5/GEMIN2/HNRNPM/PRPF39/SRSF7	22
BP	GO:0002183	cytoplasmic translational initiation	7/516	16/6187	0.000158256	0.0156674	0.0154348	EIF4A2/EIF3I/LOC100624149/DENR/EIF3H/EIF2S3/EIF2S2	7
BP	GO:0006367	transcription initiation from RNA polymerase II promoter	8/516	21/6187	0.00016987	0.0161639	0.0159239	PSMC2/MED4/POLR2I/GTF2F2/PSMC5/GTF2A2/GTF2E2/GTF2F1	8
BP	GO:0051054	positive regulation of DNA metabolic process	12/516	44/6187	0.000175831	0.0161639	0.0159239	MAD2L2/MAPKAPK5/TNFSF13/UBE2B/CCT4/CCT3/HNRNPA1/PTGES3/CCT2/CEBPG/FH/STPG4	12
BP	GO:0010257	NADH dehydrogenase complex assembly	7/516	18/6187	0.000379725	0.0323356	0.0318556	DMAC2/NDUFAB1/NDUFAF3/NDUFB3/NDUFA13/NDUFA11/NDUFS7	7
BP	GO:0032981	mitochondrial respiratory chain complex I assembly	7/516	18/6187	0.000379725	0.0323356	0.0318556	DMAC2/NDUFAB1/NDUFAF3/NDUFB3/NDUFA13/NDUFA11/NDUFS7	7
BP	GO:0010498	proteasomal protein catabolic process	24/516	138/6187	0.000389434	0.0323356	0.0318556	PSMB3/DDRGK1/PSME1/PSMD10/NSFL1C/PSMA7/RAD23A/PSMA5/PSME2/RNF4/UBE2B/PSMA3/PSMD4/PSMD8/FBXO6/RPL11/RNF5/PSMC5/CRBN/PSMD14/PSMA2/PSMA1/RACK1/PSMC6	24
BP	GO:0006397	mRNA processing	25/516	147/6187	0.000421409	0.0338971	0.0333939	U2AF1L4/SF3A3/SF3B1/SF3B6/SNRPD1/SRSF5/PQBP1/RBM5/RBM39/RBM8A/BCAS2/RBFOX2/HNRNPA1/SNRPC/TRA2A/RBM3/SRPK3/TRA2B/LSM8/HNRNPA2B1/UBL5/GEMIN2/HNRNPM/PRPF39/SRSF7	25
BP	GO:0006403	RNA localization	11/516	42/6187	0.000479325	0.0373873	0.0368323	ENY2/CHTOP/FYTTD1/SSB/CCT4/TERF1/RBM8A/CCT2/PIH1D1/RAE1/HNRNPA2B1	11
BP	GO:0043484	regulation of RNA splicing	12/516	49/6187	0.000523063	0.0395989	0.0390111	SRSF5/PQBP1/RBM5/RBM8A/RBFOX2/HNRNPA1/SRSF10/TRA2A/RBM3/TRA2B/CLK4/SRSF7	12
BP	GO:0006368	transcription elongation from RNA polymerase II promoter	6/516	14/6187	0.000548904	0.040368	0.0397687	ENY2/POLR2I/NELFE/WDR61/GTF2F2/GTF2F1	6
BP	GO:0006091	generation of precursor metabolites and energy	24/516	143/6187	0.000666145	0.0474244	0.0467204	GPI/NDUFB6/PFKM/NDUFA12/ADH5/ENO3/PGAM2/NDUFA7/ATP5PB/PTGES3/PHB2/TPI1/NDUFV2/IDH3A/FH/ACAT1/SDHD/SLC37A4/IDH3G/RHOA/NDUFB3/NDUFV1/NDUFS7/SUCLG1	24
BP	GO:0032212	positive regulation of telomere maintenance via telomerase	5/516	10/6187	0.000700127	0.0474244	0.0467204	MAPKAPK5/CCT4/CCT3/HNRNPA1/CCT2	5
BP	GO:1904358	positive regulation of telomere maintenance via telomere lengthening	5/516	10/6187	0.000700127	0.0474244	0.0467204	MAPKAPK5/CCT4/CCT3/HNRNPA1/CCT2	5
CC	GO:1990904	ribonucleoprotein complex	57/534	273/7007	8.13e-13	2.91e-10	2.4e-10	RPP21/MRPL24/ACTN4/SF3A3/RRP9/SF3B1/RALY/RPS21/MRPL55/SF3B6/RPL3/CBX5/NIP7/EIF3I/SNRPD1/RPS17/RPS3/RBM5/DRG1/SSB/SRP14/RPS23/SRP19/MRPS11/NDUFAB1/EIF3H/RPL30/RPS20/ILF2/RBM8A/BCAS2/HNRNPA1/PIH1D1/RPL11/MRPS18B/RPS18/SNRPC/MRPL48/TRA2A/RBM3/MRPL27/MRPL3/RPL14/TRA2B/HNRNPA3/MRPS36/LSM8/MRPL11/RACK1/GEMIN2/PRPF39/EIF4H/MRPS17/RPS6/MRPS5/MRPL33/RPS7	57
CC	GO:0000502	proteasome complex	19/534	39/7007	6.86e-12	6.47e-10	5.33e-10	PSMB3/PSME1/PSMD10/PSMD2/PSMA7/PSMA5/PSME2/PSMC2/PSMA3/PSMD4/PSMD8/UCHL5/PSMC5/PSMD3/PSMD14/PSMA2/PSMD13/PSMA1/PSMC6	19
CC	GO:1905369	endopeptidase complex	19/534	39/7007	6.86e-12	6.47e-10	5.33e-10	PSMB3/PSME1/PSMD10/PSMD2/PSMA7/PSMA5/PSME2/PSMC2/PSMA3/PSMD4/PSMD8/UCHL5/PSMC5/PSMD3/PSMD14/PSMA2/PSMD13/PSMA1/PSMC6	19
CC	GO:1905368	peptidase complex	21/534	48/7007	7.23e-12	6.47e-10	5.33e-10	PSMB3/PSME1/PSMD10/TADA3/PSMD2/PSMA7/ENY2/PSMA5/PSME2/PSMC2/PSMA3/PSMD4/PSMD8/UCHL5/PSMC5/PSMD3/PSMD14/PSMA2/PSMD13/PSMA1/PSMC6	21
CC	GO:0005840	ribosome	34/534	127/7007	3.77e-11	2.7e-09	2.22e-09	MRPL24/MTG1/RPS25/RPS21/RPS13/MRPL55/RPL3/RPS17/RPS3/RPS23/MRPS11/NDUFAB1/RPL30/RPS20/RPL5/RPL12/RPL11/MRPS18B/RPS18/MRPL48/RPS4X/MRPL27/MRPL3/RPL14/RPS24/MRPS36/RPLP2/MRPL11/RACK1/MRPS17/RPS6/MRPS5/MRPL33/RPS7	34
CC	GO:0022624	proteasome accessory complex	12/534	17/7007	1.48e-10	8.84e-09	7.28e-09	PSME1/PSMD10/PSMD2/PSME2/PSMC2/PSMD4/PSMD8/PSMC5/PSMD3/PSMD14/PSMD13/PSMC6	12
CC	GO:0098798	mitochondrial protein complex	31/534	117/7007	3.75e-10	1.92e-08	1.58e-08	MRPL24/APOO/DMAC2/NDUFB6/MRPL55/NDUFA12/ATP5MF/MRPS11/NDUFAB1/HADHA/ATP5PB/NDUFV2/MRPS18B/MRPL48/SDHD/MRPL27/MRPL3/PDHB/NDUFV3/MTX2/NDUFB3/MRPS36/NDUFB2/NDUFV1/MRPL11/IMMP1L/NDUFA13/NDUFA11/NDUFS7/MRPS17/MRPL33	31
CC	GO:0005838	proteasome regulatory particle	10/534	14/7007	4.61e-09	2.06e-07	1.7e-07	PSMD10/PSMD2/PSMC2/PSMD4/PSMD8/PSMC5/PSMD3/PSMD14/PSMD13/PSMC6	10
CC	GO:0044391	ribosomal subunit	25/534	98/7007	4.46e-08	1.78e-06	1.46e-06	MRPL24/RPS21/MRPL55/RPL3/RPS17/RPS3/RPS23/MRPS11/NDUFAB1/RPL30/RPS20/RPL11/MRPS18B/RPS18/MRPL48/MRPL27/MRPL3/RPL14/MRPS36/MRPL11/RACK1/MRPS17/RPS6/MRPL33/RPS7	25
CC	GO:0005759	mitochondrial matrix	24/534	101/7007	3.52e-07	1.26e-05	1.04e-05	MRPL24/DHX30/MTG1/MRPL55/GOT2/COASY/ACADVL/MRPS11/NDUFAB1/HADHA/LACTB2/MRPS18B/ETFA/MRPL48/PDK4/MRPL27/MRPL3/PDHB/MRPS36/BCL2L1/MRPL11/ATG4D/MRPS17/MRPL33	24
CC	GO:0005743	mitochondrial inner membrane	28/534	137/7007	1.05e-06	2.8e-05	2.3e-05	APOO/MTG1/DMAC2/NDUFB6/NDUFA12/GOT2/RPS3/SLC25A4/NDUFA7/ATP5MF/NDUFAB1/HADHA/ATP5PB/PHB2/NDUFV2/UCP3/SDHD/CCDC51/NDUFAF3/ATP5F1A/NDUFV3/NDUFB3/NDUFB2/NDUFV1/IMMP1L/NDUFA13/NDUFA11/NDUFS7	28
CC	GO:0000313	organellar ribosome	13/534	36/7007	1.14e-06	2.8e-05	2.3e-05	MRPL24/MTG1/MRPL55/MRPS11/NDUFAB1/MRPS18B/MRPL48/MRPL27/MRPL3/MRPS36/MRPL11/MRPS17/MRPL33	13
CC	GO:0005761	mitochondrial ribosome	13/534	36/7007	1.14e-06	2.8e-05	2.3e-05	MRPL24/MTG1/MRPL55/MRPS11/NDUFAB1/MRPS18B/MRPL48/MRPL27/MRPL3/MRPS36/MRPL11/MRPS17/MRPL33	13
CC	GO:0005747	mitochondrial respiratory chain complex I	12/534	31/7007	1.25e-06	2.8e-05	2.3e-05	DMAC2/NDUFB6/NDUFA12/NDUFAB1/NDUFV2/NDUFV3/NDUFB3/NDUFB2/NDUFV1/NDUFA13/NDUFA11/NDUFS7	12
CC	GO:0030964	NADH dehydrogenase complex	12/534	31/7007	1.25e-06	2.8e-05	2.3e-05	DMAC2/NDUFB6/NDUFA12/NDUFAB1/NDUFV2/NDUFV3/NDUFB3/NDUFB2/NDUFV1/NDUFA13/NDUFA11/NDUFS7	12
CC	GO:0045271	respiratory chain complex I	12/534	31/7007	1.25e-06	2.8e-05	2.3e-05	DMAC2/NDUFB6/NDUFA12/NDUFAB1/NDUFV2/NDUFV3/NDUFB3/NDUFB2/NDUFV1/NDUFA13/NDUFA11/NDUFS7	12
CC	GO:0031966	mitochondrial membrane	36/534	205/7007	1.52e-06	3.2e-05	2.63e-05	APOO/MTG1/DMAC2/NDUFB6/QTRT1/TOMM22/NDUFA12/GOT2/RPS3/ACADVL/SLC25A4/NDUFA7/ATP5MF/NDUFAB1/HADHA/ATP5PB/PHB2/NDUFV2/UCP3/SDHD/ARMCX3/FUNDC2/PEMT/CCDC51/NDUFAF3/ATP5F1A/NDUFV3/MTX2/NDUFB3/BCL2L1/NDUFB2/NDUFV1/IMMP1L/NDUFA13/NDUFA11/NDUFS7	36
CC	GO:0015935	small ribosomal subunit	13/534	37/7007	1.64e-06	3.26e-05	2.68e-05	RPS21/RPS17/RPS3/RPS23/MRPS11/RPS20/MRPS18B/RPS18/MRPS36/RACK1/MRPS17/RPS6/RPS7	13
CC	GO:0005740	mitochondrial envelope	38/534	224/7007	1.87e-06	3.52e-05	2.9e-05	APOO/MTG1/DMAC2/NDUFB6/QTRT1/TOMM22/NDUFA12/GOT2/RPS3/ACADVL/SLC25A4/NDUFA7/ATP5MF/NDUFAB1/HADHA/ATP5PB/PHB2/NDUFV2/UCP3/TIMM8B/SDHD/ARMCX3/FUNDC2/PEMT/CCDC51/NDUFAF3/ATP5F1A/NDUFV3/MTX2/NDUFB3/BCL2L1/PRELID3B/NDUFB2/NDUFV1/IMMP1L/NDUFA13/NDUFA11/NDUFS7	38
CC	GO:0019866	organelle inner membrane	29/534	154/7007	3.89e-06	6.34e-05	5.22e-05	APOO/MTG1/DMAC2/NDUFB6/NDUFA12/GOT2/RPS3/SLC25A4/NDUFA7/ATP5MF/NDUFAB1/HADHA/ATP5PB/PHB2/NDUFV2/UCP3/SDHD/CCDC51/NDUFAF3/TRA2B/ATP5F1A/NDUFV3/NDUFB3/NDUFB2/NDUFV1/IMMP1L/NDUFA13/NDUFA11/NDUFS7	29
CC	GO:0031967	organelle envelope	50/534	341/7007	3.94e-06	6.34e-05	5.22e-05	CDK4/APOO/MTG1/DMAC2/NDUFB6/QTRT1/ENY2/TOMM22/NDUFA12/GOT2/RPS3/ACADVL/SLC25A4/NDUFA7/ATP5MF/NDUFAB1/HADHA/HAX1/ATP5PB/PHB2/AKIRIN1/NDUFV2/NPC1/UCP3/TIMM8B/SDHD/CACYBP/ARMCX3/FUNDC2/KPNA3/PCID2/PEMT/CCDC51/NDUFAF3/TRA2B/ATP5F1A/NDUFV3/MTX2/NDUFB3/BCL2L1/RAE1/PRELID3B/NDUFB2/NDUFV1/IMMP1L/NDUFA13/NDUFA11/NDUFS7/GPX4/RTN4	50
CC	GO:0031975	envelope	50/534	341/7007	3.94e-06	6.34e-05	5.22e-05	CDK4/APOO/MTG1/DMAC2/NDUFB6/QTRT1/ENY2/TOMM22/NDUFA12/GOT2/RPS3/ACADVL/SLC25A4/NDUFA7/ATP5MF/NDUFAB1/HADHA/HAX1/ATP5PB/PHB2/AKIRIN1/NDUFV2/NPC1/UCP3/TIMM8B/SDHD/CACYBP/ARMCX3/FUNDC2/KPNA3/PCID2/PEMT/CCDC51/NDUFAF3/TRA2B/ATP5F1A/NDUFV3/MTX2/NDUFB3/BCL2L1/RAE1/PRELID3B/NDUFB2/NDUFV1/IMMP1L/NDUFA13/NDUFA11/NDUFS7/GPX4/RTN4	50
CC	GO:1990204	oxidoreductase complex	16/534	58/7007	4.07e-06	6.34e-05	5.22e-05	DMAC2/NDUFB6/NDUFA12/GMPR/NDUFAB1/NDUFV2/SDHD/PDHB/NDUFV3/NDUFB3/MRPS36/NDUFB2/NDUFV1/NDUFA13/NDUFA11/NDUFS7	16
CC	GO:0098800	inner mitochondrial membrane protein complex	17/534	69/7007	1.09e-05	0.000162344	0.000133656	APOO/DMAC2/NDUFB6/NDUFA12/ATP5MF/NDUFAB1/ATP5PB/NDUFV2/SDHD/NDUFV3/NDUFB3/NDUFB2/NDUFV1/IMMP1L/NDUFA13/NDUFA11/NDUFS7	17
CC	GO:0005681	spliceosomal complex	17/534	71/7007	1.64e-05	0.000234433	0.000193006	SF3A3/SF3B1/RALY/SF3B6/SNRPD1/RBM5/RBM8A/BCAS2/HNRNPA1/SNRPC/TRA2A/RBM3/TRA2B/HNRNPA3/LSM8/GEMIN2/PRPF39	17
CC	GO:0030016	myofibril	14/534	54/7007	3.52e-05	0.000485128	0.0003994	TMOD4/TNNI2/TNNT3/ACTN4/CSRP3/TNNT1/MYOM1/MYH7/MYH4/PDLIM3/DES/MYL2/MYOZ1/VCL	14
CC	GO:0015629	actin cytoskeleton	23/534	122/7007	3.83e-05	0.000508452	0.000418602	TMOD4/MYH7B/TNNI2/TNNT3/ACTN4/MYL6/TNNT1/MYH7/MYH4/TPM1/PDLIM3/ACTR10/KANSL2/HSPB7/DCTN3/ARPC4/MYL2/MYOZ1/VCL/NPM3/CAPZA2/KEAP1/ARPC1A	23
CC	GO:0005746	mitochondrial respirasome	13/534	49/7007	5.15e-05	0.000658083	0.000541791	DMAC2/NDUFB6/NDUFA12/NDUFAB1/NDUFV2/SDHD/NDUFV3/NDUFB3/NDUFB2/NDUFV1/NDUFA13/NDUFA11/NDUFS7	13
CC	GO:0022627	cytosolic small ribosomal subunit	9/534	25/7007	5.47e-05	0.000674979	0.000555702	RPS21/RPS17/RPS3/RPS23/RPS20/RPS18/RACK1/RPS6/RPS7	9
CC	GO:0043292	contractile fiber	14/534	57/7007	6.75e-05	0.000805347	0.000663032	TMOD4/TNNI2/TNNT3/ACTN4/CSRP3/TNNT1/MYOM1/MYH7/MYH4/PDLIM3/DES/MYL2/MYOZ1/VCL	14
CC	GO:0098803	respiratory chain complex	13/534	52/7007	0.000100648	0.00116233	0.000956929	DMAC2/NDUFB6/NDUFA12/NDUFAB1/NDUFV2/SDHD/NDUFV3/NDUFB3/NDUFB2/NDUFV1/NDUFA13/NDUFA11/NDUFS7	13
CC	GO:1990234	transferase complex	38/534	271/7007	0.000155945	0.00174463	0.00143633	CDK4/MAD2L2/MAX/UBE2D3/TADA3/ENY2/CBX5/PFKM/DDOST/SNRPD1/UBE2L3/ANAPC16/UBE2B/KANSL2/POLR2I/RUVBL2/FBXO6/INO80C/WDR61/DCUN1D5/CACYBP/PFKFB1/GTF2F2/ARIH2/CRBN/ANAPC13/CXXC1/POLR3D/GTF2A2/GTF2E2/MRPS36/POLR3F/RPN2/POLD2/DPF2/TMEM258/DDB2/KEAP1	38
CC	GO:0000315	organellar large ribosomal subunit	8/534	23/7007	0.000189524	0.00199558	0.00164293	MRPL24/MRPL55/NDUFAB1/MRPL48/MRPL27/MRPL3/MRPL11/MRPL33	8
CC	GO:0005762	mitochondrial large ribosomal subunit	8/534	23/7007	0.000189524	0.00199558	0.00164293	MRPL24/MRPL55/NDUFAB1/MRPL48/MRPL27/MRPL3/MRPL11/MRPL33	8
CC	GO:0022626	cytosolic ribosome	13/534	58/7007	0.000327329	0.00334811	0.00275646	RPS21/RPL3/RPS17/RPS3/RPS23/RPL30/RPS20/RPL11/RPS18/RPL14/RACK1/RPS6/RPS7	13
CC	GO:0101031	chaperone complex	5/534	10/7007	0.000460509	0.0045795	0.00377025	STIP1/CCT4/CCT3/CCT2/CDC37	5
CC	GO:0098556	cytoplasmic side of rough endoplasmic reticulum membrane	8/534	26/7007	0.000492197	0.00476234	0.00392078	RPS21/RPS17/RPS3/RPS23/RPS20/RPL11/RPS18/RPL14	8
CC	GO:0070469	respirasome	13/534	62/7007	0.000650066	0.00612431	0.00504206	DMAC2/NDUFB6/NDUFA12/NDUFAB1/NDUFV2/SDHD/NDUFV3/NDUFB3/NDUFB2/NDUFV1/NDUFA13/NDUFA11/NDUFS7	13
CC	GO:0030017	sarcomere	11/534	48/7007	0.000764532	0.00701801	0.00577784	TMOD4/TNNI2/TNNT3/ACTN4/CSRP3/TNNT1/MYOM1/MYH7/PDLIM3/DES/MYOZ1	11
CC	GO:0005839	proteasome core complex	6/534	17/7007	0.00113852	0.0101897	0.00838908	PSMB3/PSMA7/PSMA5/PSMA3/PSMA2/PSMA1	6
CC	GO:0098554	cytoplasmic side of endoplasmic reticulum membrane	8/534	30/7007	0.00140529	0.0122706	0.0101022	RPS21/RPS17/RPS3/RPS23/RPS20/RPL11/RPS18/RPL14	8
CC	GO:0015934	large ribosomal subunit	12/534	61/7007	0.00186606	0.0159059	0.0130951	MRPL24/MRPL55/RPL3/NDUFAB1/RPL30/RPL11/MRPL48/MRPL27/MRPL3/RPL14/MRPL11/MRPL33	12
CC	GO:0016607	nuclear speck	17/534	104/7007	0.00205278	0.0170906	0.0140704	SF3A3/STK19/SF3B1/CHTOP/OSGEP/SRSF5/PQBP1/FYTTD1/RBM39/VPS72/RBM8A/BCAS2/NAMPT/CXXC1/POLR3D/FIBP/SRSF7	17
CC	GO:0030867	rough endoplasmic reticulum membrane	8/534	32/7007	0.00220564	0.0179459	0.0147746	RPS21/RPS17/RPS3/RPS23/RPS20/RPL11/RPS18/RPL14	8
CC	GO:0005684	U2-type spliceosomal complex	8/534	33/7007	0.00272117	0.0214666	0.0176732	SF3A3/SF3B1/SNRPD1/RBM8A/BCAS2/SNRPC/LSM8/PRPF39	8
CC	GO:0005730	nucleolus	31/534	242/7007	0.00275828	0.0214666	0.0176732	CDK4/RPP21/DDRGK1/MAD2L2/RRP9/RPL3/CBX5/NIP7/SRSF5/RPS3/ACADVL/WDR74/SRP19/OXR1/TERF1/ILF2/RPS19BP1/POLR2I/PIH1D1/RPL11/RCN2/TRA2A/EDF1/DCTN3/NLE1/CLEC3B/NPM3/MTX2/RPS6/SNAPC3/RPS7	31
CC	GO:0005791	rough endoplasmic reticulum	9/534	42/7007	0.00371353	0.0282861	0.0232876	RPS21/RPS17/RPS3/RANGRF/RPS23/RPS20/RPL11/RPS18/RPL14	9
CC	GO:0071013	catalytic step 2 spliceosome	8/534	37/7007	0.00577874	0.0430997	0.0354835	SF3A3/SF3B1/RALY/SNRPD1/RBM8A/BCAS2/HNRNPA1/HNRNPA3	8
CC	GO:0005783	endoplasmic reticulum	38/534	332/7007	0.0069691	0.0491573	0.0404706	TMEM38B/CAMK2D/RPS21/PDIA6/DDOST/RPS17/RPS3/TRAPPC4/DNASE1L1/RANGRF/RNF13/B2M/RPS23/RPS20/HAX1/TMED5/PRXL2B/FBXO6/RPL11/NPC1/PIGK/RNF5/RPS18/RCN2/SRPX/NDFIP2/RPL14/HYAL3/SELENOM/MRLN/INSIG2/PLCD4/RPN2/DPM1/TMEM258/KEAP1/RNF128/RPS6	38
CC	GO:0000314	organellar small ribosomal subunit	4/534	11/7007	0.00714017	0.0491573	0.0404706	MRPS11/MRPS18B/MRPS36/MRPS17	4
CC	GO:0005763	mitochondrial small ribosomal subunit	4/534	11/7007	0.00714017	0.0491573	0.0404706	MRPS11/MRPS18B/MRPS36/MRPS17	4
CC	GO:0005865	striated muscle thin filament	4/534	11/7007	0.00714017	0.0491573	0.0404706	TMOD4/TNNI2/TNNT3/TNNT1	4
MF	GO:0003723	RNA binding	82/501	473/6851	2.65e-14	1.15e-11	1.07e-11	RPP21/LOC100624590/EIF5A/DHX30/YBX3/U2AF1L4/PUSL1/SF3A3/RRP9/EIF4A2/SF3B1/RALY/SF3B6/RPL3/NIP7/TRNAU1AP/EIF3I/PPIE/SNRPD1/SERBP1/SRSF5/RPS3/LOC100624149/MYH4/RBM5/FXR1/FYTTD1/DENR/DGCR8/SSB/SRP14/RBM39/EEF2/SRP19/MRPS11/RNPS1/EIF3H/RPL30/LACTB2/RPS20/ILF2/RBM8A/RPL5/RBFOX2/PCBP2/HNRNPA1/RBM18/RPL11/SRSF10/EXOSC2/NELFE/RPS18/SNRPC/HNRNPC/SLIRP/AIMP1/TRA2A/EIF2S3/RBM3/RPS4X/EIF1/RPL14/RPUSD3/TRA2B/…	82
MF	GO:0003735	structural constituent of ribosome	27/501	104/6851	3.43e-09	7.44e-07	6.93e-07	MRPL24/RPS21/MRPL55/RPL3/RPS17/RPS3/RPS23/MRPS11/RPL30/RPS20/RPL5/RPL12/RPL11/MRPS18B/RPS18/RPS4X/MRPL27/MRPL3/RPL14/RPS24/RPLP2/MRPL11/MRPS17/RPS6/MRPS5/MRPL33/RPS7	27
MF	GO:0005198	structural molecule activity	35/501	218/6851	6.74e-06	0.000974828	0.000907916	MRPL24/MYL6/RPS21/CSRP3/MRPL55/RPL3/RPS17/RPS3/PDLIM3/RPS23/MRPS11/RPL30/RPS20/RPL5/TUBA8/RPL12/RPL11/MRPS18B/TUBB/RPS18/RPS4X/MRPL27/MRPL3/RPL14/ARPC4/VCL/RPS24/PSMD13/RPLP2/MRPL11/MRPS17/RPS6/MRPS5/MRPL33/RPS7	35
MF	GO:0090079	translation regulator activity nucleic acid binding	15/501	59/6851	1.46e-05	0.00158318	0.00147451	EIF5A/EIF4A2/EIF3I/LOC100624149/DENR/EEF2/PAIP2/EIF3H/EIF2S3/EIF1/GTF2A2/GTF2E2/PAIP1/EIF2S2/EIF4H	15
MF	GO:0003743	translation initiation factor activity	11/501	36/6851	3.2e-05	0.00277853	0.00258782	EIF4A2/EIF3I/LOC100624149/DENR/EIF3H/EIF2S3/EIF1/GTF2A2/GTF2E2/EIF2S2/EIF4H	11
MF	GO:0008135	translation factor activity RNA binding	13/501	52/6851	6.57e-05	0.00454082	0.00422914	EIF5A/EIF4A2/EIF3I/LOC100624149/DENR/EEF2/EIF3H/EIF2S3/EIF1/GTF2A2/GTF2E2/EIF2S2/EIF4H	13
MF	GO:0045182	translation regulator activity	15/501	67/6851	7.32e-05	0.00454082	0.00422914	EIF5A/EIF4A2/EIF3I/LOC100624149/DENR/EEF2/PAIP2/EIF3H/EIF2S3/EIF1/GTF2A2/GTF2E2/PAIP1/EIF2S2/EIF4H	15
MF	GO:0003729	mRNA binding	18/501	99/6851	0.000252264	0.0136853	0.012746	YBX3/SF3B1/SF3B6/SERBP1/SRSF5/FXR1/FYTTD1/DENR/SSB/MRPS11/RBM8A/HNRNPA1/SNRPC/SLIRP/TRA2B/HNRNPA3/EIF2S2/RPS7	18

## Sheet: Supplementary Table S5-4
Supplementary Table S5-4 KEGG analysis of splicing isoforms occurring only in group L
ID	Description	GeneRatio	BgRatio	Pvalue	Padjust	Qvalue	GeneID	Count
ssc03010	Ribosome	39/503	151/8835	3.9e-16	1.19e-13	1.04e-13	MRPL24/RPS25/RPL37A/RPS21/RPS13/RPL3/RPS17/RPS3/RPS23/MRPS11/RPL3L/RPL30/RPS20/RPL5/RPS19/RPL12/RPL11/MRPS15/RPS18/MRPS10/MRPS18C/RPS4X/MRPL12/MRPL27/MRPL3/RPL14/RPL24/RPS24/RPL37/MRPL22/RPLP2/MRPL11/FAU/RPL4/MRPS17/RPS6/MRPS5/MRPL33/RPS7	39
ssc05012	Parkinson disease	52/503	268/8835	2.07e-15	3.15e-13	2.75e-13	PSMB3/CAMK2D/NDUFB6/PSMD2/NDUFS4/GNAS/PSMA7/SLC39A3/PSMA5/TXN2/NDUFA12/UCHL1/PSMC2/KLC1/ATP5MC1/UBE2G1/UBE2L3/CAMK2G/SLC25A4/NDUFA7/PSMA3/NDUFAB1/PSMD4/ATP5PB/TUBA8/PSMD8/BAX/NDUFV2/TUBB/SDHD/ATP5F1C/PSMC5/PSMD3/ITPR1/ATP5F1A/NDUFV3/PSMD14/NFE2L2/NDUFB3/BCL2L1/NDUFB2/PSMA2/PSMD13/NDUFV1/NDUFS3/PSMC3/PSMA1/NDUFA13/KEAP1/NDUFA11/NDUFS7/PSMC6	52
ssc05016	Huntington disease	53/503	308/8835	1.93e-13	1.96e-11	1.71e-11	PSMB3/ATG2A/CLTA/NDUFB6/PSMD2/NDUFS4/PSMA7/RB1CC1/PSMA5/NDUFA12/PSMC2/KLC1/ATP5MC1/AP2M1/SLC25A4/NDUFA7/ACTR10/PSMA3/NDUFAB1/PSMD4/ATP5PB/TUBA8/POLR2I/PSMD8/BAX/HDAC1/NDUFV2/GPX7/TUBB/SDHD/DCTN3/ATP5F1C/PSMC5/PSMD3/ITPR1/ATP5F1A/NDUFV3/SOD2/PSMD14/NDUFB3/GPX8/NDUFB2/PSMA2/PSMD13/NDUFV1/NDUFS3/PSMC3/PSMA1/NDUFA13/NDUFA11/NDUFS7/CLTB/PSMC6	53
ssc05014	Amyotrophic lateral sclerosis	57/503	364/8835	1.37e-12	9.7e-11	8.47e-11	PSMB3/ATG2A/MAPK12/NDUFB6/PSMD2/NDUFS4/PSMA7/RB1CC1/PSMA5/NDUFA12/PSMC2/KLC1/ATP5MC1/NDUFA7/ACTR10/PSMA3/NDUFAB1/PSMD4/ATP5PB/HNRNPA1/TBK1/TUBA8/MAP1LC3B/PSMD8/BAX/NDUFV2/GPX7/TUBB/SDHD/DCTN3/ATP5F1C/PSMC5/PSMD3/ATP5F1A/CHMP2B/NDUFV3/PPP3CC/PSMD14/HNRNPA3/NDUFB3/GPX8/BCL2L1/RAE1/NDUFB2/HNRNPA2B1/PSMA2/PSMD13/NDUFV1/NXF1/NDUFS3/PSMC3/PSMA1/NDUFA13/NDUFA11/NDUFS7/PSMC6/SRSF7	57
ssc03050	Proteasome	19/503	46/8835	1.59e-12	9.7e-11	8.47e-11	PSMB3/PSME1/PSMD2/PSMF1/PSMA7/PSMA5/PSME2/PSMC2/PSMA3/PSMD4/PSMD8/PSMC5/PSMD3/PSMD14/PSMA2/PSMD13/PSMC3/PSMA1/PSMC6	19
ssc03040	Spliceosome	29/503	125/8835	4.65e-11	2.37e-09	2.07e-09	U2AF1L4/SF3A3/SF3B1/SF3B6/PHF5A/PPIE/SNRPD1/SRSF5/PQBP1/CCDC12/PUF60/RBM8A/BCAS2/HNRNPA1/SRSF10/THOC1/SNRPC/HNRNPC/CWC15/TRA2A/HNRNPK/TRA2B/HNRNPA3/LSM8/LSM4/HNRNPM/RBM22/SNRNP27/SRSF7	29
ssc05020	Prion disease	45/503	273/8835	6.47e-11	2.82e-09	2.46e-09	PSMB3/MAPK12/NDUFB6/PSMD2/NDUFS4/PSMA7/STIP1/PSMA5/NDUFA12/PSMC2/KLC1/ATP5MC1/SLC25A4/NDUFA7/PSMA3/NDUFAB1/PSMD4/ATP5PB/TUBA8/PSMD8/BAX/NDUFV2/TUBB/CACNA1S/SDHD/ATP5F1C/PSMC5/PSMD3/ITPR1/ATP5F1A/NDUFV3/PPP3CC/PSMD14/NDUFB3/NDUFB2/PSMA2/PSMD13/NDUFV1/NDUFS3/PSMC3/PSMA1/NDUFA13/NDUFA11/NDUFS7/PSMC6	45
ssc05022	Pathways of neurodegeneration - multiple diseases	61/503	474/8835	9.56e-10	3.65e-08	3.18e-08	PSMB3/ATG2A/MAPK12/CAMK2D/NDUFB6/PSMD2/NDUFS4/PSMA7/RB1CC1/PSMA5/NDUFA12/UCHL1/PSMC2/KLC1/ATP5MC1/UBE2G1/UBE2L3/CAMK2G/SLC25A4/NDUFA7/ACTR10/PSMA3/NDUFAB1/PSMD4/ATP5PB/TBK1/TUBA8/MAP1LC3B/PSMD8/BAX/NDUFV2/GPX7/TUBB/PPID/CACNA1S/SDHD/DCTN3/ATP5F1C/PSMC5/PSMD3/ITPR1/ATP5F1A/CHMP2B/NDUFV3/PPP3CC/PSMD14/NDUFB3/GPX8/BCL2L1/NDUFB2/PSMA2/PSMD13/NDUFV1/NDUFS3/PSMC3/PSMA1/NDUFA13/NDUFA11/NDUFS7/PSMC6/ATP2…	61
ssc01200	Carbon metabolism	25/503	112/8835	2.46e-09	8.33e-08	7.27e-08	ALDOA/GPI/PFKM/GOT2/ADH5/ENO3/PGAM2/GPT/SHMT2/TPI1/GCSH/ENO1/IDH3A/PKM/FH/ACAT1/SDHD/FBP2/IDH3G/ESD/ACOX1/PDHB/SUCLG2/OGDH/SUCLG1	25
ssc05010	Alzheimer disease	49/503	384/8835	6.45e-08	1.97e-06	1.72e-06	PSMB3/ATG2A/NDUFB6/PSMD2/NDUFS4/PSMA7/SLC39A3/RB1CC1/PSMA5/NDUFA12/PSMC2/KLC1/ATP5MC1/SLC25A4/NDUFA7/PSMA3/NDUFAB1/PSMD4/ATP5PB/TUBA8/PSENEN/PSMD8/NDUFV2/TUBB/PPID/CACNA1S/SDHD/ATP5F1C/PSMC5/PSMD3/ITPR1/ATP5F1A/NDUFV3/PPP3CC/PSMD14/NDUFB3/NDUFB2/PSMA2/PSMD13/NDUFV1/NDUFS3/PSMC3/PSMA1/NDUFA13/NDUFA11/NDUFS7/PSMC6/ATP2A1/RTN4	49
ssc05415	Diabetic cardiomyopathy	31/503	205/8835	4.95e-07	1.37e-05	1.2e-05	MAPK12/CAMK2D/NDUFB6/NDUFS4/CPT1B/NDUFA12/ATP5MC1/CAMK2G/SLC25A4/NDUFA7/NDUFAB1/ATP5PB/NDUFV2/SDHD/COL1A2/PDK4/CD36/ATP5F1C/PDK2/SLC2A4/PDHB/ATP5F1A/NDUFV3/NDUFB3/NDUFB2/NDUFV1/NDUFS3/NDUFA13/NDUFA11/NDUFS7/ATP2A1	31
ssc04922	Glucagon signaling pathway	18/503	101/8835	1.31e-05	0.000334181	0.000291796	CAMK2D/GNAS/CPT1B/PFKM/CAMK2G/PGAM2/LDHB/LDHB/PHKB/PRMT1/PKM/FBP2/PFKFB1/PHKA1/PDHB/ITPR1/PPP3CC/PYGM	18
ssc00190	Oxidative phosphorylation	21/503	137/8835	2.85e-05	0.000667892	0.000583181	NDUFB6/NDUFS4/NDUFA12/ATP5MC1/NDUFA7/ATP5MF/NDUFAB1/ATP5PB/NDUFV2/ATP6V0B/SDHD/ATP5F1C/ATP5F1A/NDUFV3/NDUFB3/NDUFB2/NDUFV1/NDUFS3/NDUFA13/NDUFA11/NDUFS7	21
ssc00010	Glycolysis / Gluconeogenesis	13/503	62/8835	3.58e-05	0.000780129	0.000681183	ALDOA/GPI/PFKM/ADH5/ENO3/PGAM2/LDHB/LDHB/TPI1/ENO1/PKM/FBP2/PDHB	13
ssc05017	Spinocerebellar ataxia	21/503	146/8835	7.44e-05	0.00151372	0.00132173	PSMB3/ATG2A/PSMD2/PSMA7/RB1CC1/PSMA5/PSMC2/SLC25A4/PSMA3/PSMD4/PSMD8/PSMC5/PSMD3/ITPR1/PSMD14/PSMA2/PSMD13/PSMC3/PSMA1/PSMC6/ATP2A1	21
ssc04714	Thermogenesis	28/503	232/8835	0.000125785	0.00239777	0.00209365	MAPK12/NDUFB6/NDUFS4/GNAS/CPT1B/NDUFA12/ATP5MC1/NDUFA7/ATP5MF/NDUFAB1/ATP5PB/NDUFV2/SDHD/ATP5F1C/SLC25A20/NDUFAF3/ATP5F1A/NDUFV3/NDUFB3/RHEB/NDUFB2/PNPLA2/NDUFV1/NDUFS3/NDUFA13/NDUFA11/NDUFS7/RPS6	28
ssc00020	Citrate cycle (TCA cycle)	8/503	29/8835	0.000154577	0.0027733	0.00242155	IDH3A/FH/SDHD/IDH3G/PDHB/SUCLG2/OGDH/SUCLG1	8
ssc01230	Biosynthesis of amino acids	13/503	72/8835	0.000181186	0.0030701	0.00268071	ALDOA/PFKM/GOT2/ENO3/PGAM2/GPT/SHMT2/TPI1/ENO1/IDH3A/PKM/IDH3G/ALDH18A1	13
ssc05171	Coronavirus disease - COVID-19	29/503	250/8835	0.000192418	0.00308881	0.00269704	MAPK12/RPS25/RPL37A/RPS21/RPS13/RPL3/RPS17/RPS3/RPS23/RPL3L/RPL30/RPS20/RPL5/TBK1/VWF/RPS19/RPL12/RPL11/RPS18/RPS4X/RPL14/RPL24/RPS24/RPL37/RPLP2/FAU/RPL4/RPS6/RPS7	29
ssc00051	Fructose and mannose metabolism	8/503	32/8835	0.000325633	0.0049659	0.00433606	ALDOA/PFKM/TSTA3/TPI1/FBP2/PFKFB1/GMPPA/AKR1B1	8
ssc05208	Chemical carcinogenesis - reactive oxygen species	26/503	227/8835	0.000497599	0.00722704	0.00631041	MAPK12/NDUFB6/AKR1C2/NDUFS4/NDUFA12/ATP5MC1/SLC25A4/NDUFA7/NDUFAB1/ATP5PB/NDUFV2/SDHD/ATP5F1C/ATP5F1A/NDUFV3/SOD2/GSTO1/NFE2L2/NDUFB3/NDUFB2/NDUFV1/NDUFS3/NDUFA13/KEAP1/NDUFA11/NDUFS7	26
ssc05132	Salmonella infection	28/503	253/8835	0.000535619	0.00742563	0.00648381	MAPK12/MYLPF/TXN2/RPS3/IL18/KLC1/RAB9A/ANXA2/DYNLT1/ACTR10/TUBA8/BAX/TUBB/FBXO22/DCTN3/KPNA3/EXOC7/RHOA/ARPC4/BRK1/RAB7A/KPNA4/MYL2/NCKAP1/VPS39/SKP1/ARPC1A/DYNC2LI1	28
ssc05414	Dilated cardiomyopathy	14/503	95/8835	0.00090402	0.0119881	0.0104676	TPM2/TPM3/GNAS/ITGA10/MYH7/SGCA/TPM1/DES/MYL3/CACNG6/CACNA1S/EMD/MYL2/ATP2A1	14
ssc04146	Peroxisome	13/503	86/8835	0.00107282	0.0136338	0.0119046	PRDX1/CRAT/PEX19/ECH1/PHYH/NUDT7/DHRS4/ACOX1/HACL1/SOD2/PECR/GSTK1/DECR2	13
ssc01212	Fatty acid metabolism	10/503	57/8835	0.00125383	0.0152967	0.0133566	OXSM/CPT1B/HSD17B8/ACADVL/CBR4/HADHA/ACAT1/ACOX1/HACD3/HADHB	10
ssc05410	Hypertrophic cardiomyopathy	13/503	90/8835	0.0016459	0.0193077	0.0168588	TPM2/TPM3/ITGA10/MYH7/SGCA/TPM1/DES/MYL3/CACNG6/CACNA1S/EMD/MYL2/ATP2A1	13
ssc05169	Epstein-Barr virus infection	23/503	209/8835	0.0017697	0.0199911	0.0174555	CDK4/MAPK12/SLA-DRB1/PSMD2/SLA-DMA/PSMC2/B2M/B2M/GADD45B/PSMD4/CDK2/TBK1/PSMD8/BAX/HDAC1/PSMC5/PSMD3/GADD45G/PSMD14/PSMD13/PSMC3/DDB2/PSMC6	23
ssc04723	Retrograde endocannabinoid signaling	18/503	149/8835	0.00195216	0.0212646	0.0185675	MAPK12/NDUFB6/NDUFS4/NDUFA12/NDUFA7/NDUFAB1/NDUFV2/CACNA1S/ITPR1/NDUFV3/NDUFB3/NDUFB2/NDUFV1/NDUFS3/NDUFA13/NDUFA11/GNG7/NDUFS7	18
ssc04137	Mitophagy - animal	11/503	71/8835	0.00208443	0.0219225	0.019142	FUNDC1/FIS1/USP15/TBK1/MAP1LC3B/TBC1D17/CALCOCO2/RAB7A/PGAM5/BCL2L1/TAX1BP1	11
ssc00620	Pyruvate metabolism	8/503	43/8835	0.00258573	0.0262883	0.022954	ADH5/ACYP2/LDHB/LDHB/PKM/FH/ACAT1/PDHB	8
ssc04141	Protein processing in endoplasmic reticulum	19/503	167/8835	0.0029659	0.0291806	0.0254795	SSR2/UBE2D3/NGLY1/NSFL1C/RAD23A/PDIA6/DDOST/UBE2G1/UFD1/UBXN1/RBX1/BAX/FBXO6/RNF5/NFE2L2/DNAJC10/RPN2/UBXN6/SKP1	19
ssc00760	Nicotinate and nicotinamide metabolism	7/503	35/8835	0.0031025	0.0295707	0.0258201	NMNAT1/NMRK2/SIRT5/NAMPT/NT5C/NT5C2/NNT	7
ssc04260	Cardiac muscle contraction	12/503	87/8835	0.00362915	0.0333995	0.0291634	TRDN/TPM2/TPM3/MYH7/TPM1/ASPH/MYL3/CACNG6/CACNA1S/ATP1B3/MYL2/ATP2A1	12
ssc04932	Non-alcoholic fatty liver disease	18/503	158/8835	0.00372323	0.0333995	0.0291634	MAPK12/NDUFB6/NDUFS4/NDUFA12/NDUFA7/NDUFAB1/BAX/NDUFV2/SDHD/NDUFV3/NDUFB3/NDUFB2/NDUFV1/NDUFS3/NR1H3/NDUFA13/NDUFA11/NDUFS7	18
ssc01250	Biosynthesis of nucleotide sugars	7/503	38/8835	0.00502427	0.0437829	0.0382298	GPI/TSTA3/UAP1/NANS/GALT/GALK2/GMPPA	7
