# Supplementary material for: Integrative Analysis of Nanopore and Illumina Sequencing Reveals Alternative Splicing Complexity in Pig Longissimus Dorsi Muscle
Source: Front Genet. 2022 Apr 11;13:877646. doi: 10.3389/fgene.2022.877646 (PMC9035893; doi:10.3389/fgene.2022.877646)
Supplement: Supplementary file 12 [file Table13.XLSX]

## Sheet: Sheet1
Supplementary Table S13 All sample IMF content details
SampleID	IMF content
H02	4.05
H10	4.98
H12	4.2
H14	5.4
H16	5.43
H17	4.40165
H18	4.5571
H21	12.1843
H22	4.71951
H24	5.55213
H25	8.26244
H26	4.37004
H27	4.07472
H28	5.58339
H29	4.48383
L04	1.6
L06	1.14
L09	1.57
L14	1.05
L16	1.49
L19	1.35
L21	0.97
L22	1.3
L23	0.78
L24	1.3
L25	1.28
L26	1.4
L27	1.32
L28	1.17978
L31	1.38431
