# Supplementary material for: Integrative Analysis of Nanopore and Illumina Sequencing Reveals Alternative Splicing Complexity in Pig Longissimus Dorsi Muscle
Source: Front Genet. 2022 Apr 11;13:877646. doi: 10.3389/fgene.2022.877646 (PMC9035893; doi:10.3389/fgene.2022.877646)
Supplement: Supplementary file 13 [file Table7.XLSX]

## Sheet: Supplementary Table S7
Supplementary Table S7 Result of DEGs
GeneID	Log2FoldChange	Pvalue	Padjust
ONT.9918	-3.51021	1.32002e-09	1.70546e-05
ONT.11069	-4.05472	4.67967e-09	3.02307e-05
ONT.3490	-1.44652	7.41571e-08	0.00031937
ONT.3791	12.1318	3.00342e-07	0.000939507
ONT.4294	-1.29607	2.03182e-06	0.00375017
ONT.507	-1.75415	2.6982e-06	0.00435759
ONT.5046	-1.2451	1.94538e-05	0.0193341
ONT.13352	-1.34874	2.41961e-05	0.0198764
ONT.12957	-1.82227	2.46147e-05	0.0198764
ONT.5184	-1.15031	2.8072e-05	0.0213347
ONT.2091	-1.87222	5.51618e-05	0.0308508
ONT.5770	-1.4518	9.40877e-05	0.0357533
ONT.16117	2.22963	9.87596e-05	0.0364564
ONT.14314	-1.37512	0.000162653	0.0492223
ONT.12092	1.28178	0.00016382	0.0492223
