# Supplementary material for: Integrative Analysis of Nanopore and Illumina Sequencing Reveals Alternative Splicing Complexity in Pig Longissimus Dorsi Muscle
Source: Front Genet. 2022 Apr 11;13:877646. doi: 10.3389/fgene.2022.877646 (PMC9035893; doi:10.3389/fgene.2022.877646)
Supplement: Supplementary file 14 [file Table8.XLSX]

## Sheet: Supplementary Table S8
Supplementary Table S8 The proportion of the expression of each transcript
TranscriptID	Count%_H	Count%_L	Pvalue
ONT.9523.1	0.366988	0.440627	0.165613
ONT.9523.10	0.0127032	0.0107749	0.779363
ONT.9523.11	0.000520353	0.0003909	0.148868
ONT.9523.2	0.0356058	0.0696895	0.0377791
ONT.9523.3	0.153798	0.0263257	0.00251113
ONT.9523.4	0.00858772	0.0149448	0.105294
ONT.9523.5	0.0545538	0.00347378	0.000234038
ONT.9523.7	0.0210865	0.0487965	0.00713859
ONT.9523.8	0.267778	0.311573	0.149287
ONT.9523.9	0.0783782	0.073404	0.835802
ONT.3832.1	0.229372	0.381071	0.0233442
ONT.3832.12	0.189419	0.16227	0.389475
ONT.3832.14	0.224673	0.210828	0.888028
ONT.3832.16	0.00425185	0.00338809	0.509561
ONT.3832.18	0.00864142	0.0103714	0.683896
ONT.3832.3	0.0382544	0.0475441	0.63594
ONT.3832.5	0.223313	0.0777005	0.00688687
ONT.3832.6	0.0820744	0.106827	0.526955
ONT.191.1	0.230921	0.321863	0.151038
ONT.191.10	0.118074	0.0479224	0.00458397
ONT.191.3	0.204051	0.340129	0.0188199
ONT.191.4	0.0825508	0.057658	0.400033
ONT.191.5	0.105354	0.0408841	0.0272076
ONT.191.6	0.123053	0.0838418	0.181702
ONT.191.8	0.135995	0.107702	0.5031
ONT.15153.1	0.798079	0.682641	0.00744905
ONT.15153.12	0.0508457	0.0332179	0.217109
ONT.15153.14	0.0145342	0.0177012	0.677411
ONT.15153.15	0.00642922	0.00615771	0.902816
ONT.15153.3	0.0372962	0.17003	0.000110466
ONT.15153.4	0.0153091	0.00589975	0.15365
ONT.15153.6	0.0409944	0.049317	0.505647
ONT.15153.8	0.023817	0.0160276	0.385843
ONT.15153.9	0.0126954	0.019008	0.429904
ONT.11047.1	0.662194	0.584977	0.452286
ONT.11047.2	0.204239	0.104301	0.182381
ONT.11047.3	0.0392479	0.176782	0.000667006
ONT.11047.4	0.0943191	0.133941	0.376875
ONT.16074.1	0.336884	0.228306	0.188892
ONT.16074.11	0.0406035	0.0155431	0.218608
ONT.16074.12	0.0224802	0.0276044	0.678755
ONT.16074.2	0.0753509	0.0479362	0.100249
ONT.16074.4	0.130944	0.118078	0.615396
ONT.16074.5	0.000708387	0.000741345	0.904212
ONT.16074.6	0.160214	0.119403	0.168188
ONT.16074.7	0.000904588	0.0079929	0.30523
ONT.16074.8	0.226728	0.432455	0.0108793
ONT.16074.9	0.00518385	0.00194041	0.279586
ONT.10763.1	0.0917471	0.0730021	0.119837
ONT.10763.11	0.00741632	0.009455	0.535737
ONT.10763.12	0.000685038	0.000568654	0.594485
ONT.10763.3	0.0496823	0.0533133	0.708676
ONT.10763.4	0.168991	0.115262	0.0157559
ONT.10763.5	0.518048	0.503569	0.72147
ONT.10763.6	0.163431	0.24483	0.0127675
ONT.10349.10	0	0.00042631	0.195641
ONT.10349.2	0.918225	0.632161	0.0229029
ONT.10349.26	0.0812086	0.0662883	0.644174
ONT.10349.27	6.49795e-05	3.46281e-05	0.266613
ONT.10349.9	0.000500918	0.30109	0.0135364
ONT.7120.11	0.0404832	0.0312175	0.521816
ONT.7120.12	0.128813	0.280339	0.0156404
ONT.7120.13	0.0505376	0.108993	0.0225767
ONT.7120.2	0.140976	0.126867	0.698513
ONT.7120.3	0.274195	0.192451	0.09296
ONT.7120.6	0.172676	0.0976592	0.0300548
ONT.7120.7	0.0442782	0.0619305	0.440308
ONT.7120.8	0.0590459	0.0365742	0.119716
ONT.7120.9	0.0889956	0.0639697	0.116181
ONT.14524.1	0.0332459	0.0938239	0.0723114
ONT.14524.11	0.00214082	0.00355255	0.379079
ONT.14524.12	0.0241775	0.0249924	0.917257
ONT.14524.13	3.25521e-05	0.000262688	0.073497
ONT.14524.15	0.0129595	0.0179147	0.355245
ONT.14524.17	0.00993822	0.0167079	0.299295
ONT.14524.2	0.702023	0.508841	6.74535e-05
ONT.14524.3	0.00481216	0.00758582	0.27771
ONT.14524.5	0.00123141	0.00158976	0.488551
ONT.14524.8	0.172016	0.239546	0.0281437
ONT.14524.9	0.0374239	0.0851834	0.00759018
